# Supplementary material for: How many people will need palliative care in Scotland by 2040? A mixed-method study of projected palliative care need and recommendations for service delivery
Source: PubMed Central journal article supplement — BMJ Open. 2021 Feb 3;11(2):e041317. doi: 10.1136/bmjopen-2020-041317 (PMC7868264; doi:10.1136/bmjopen-2020-041317), 2021-02-03
Supplement: bmjopen-2020-041317.draft_revisions.pdf [file bmjopen-2020-041317.draft_revisions.pdf]

# BMJ Open

BMJ Open is committed to open peer review. As part of this commitment we make the peer review history of every article we publish publicly available.

When an article is published we post the peer reviewers' comments and the authors' responses online. We also post the versions of the paper that were used during peer review. These are the versions that the peer review comments apply to.

The versions of the paper that follow are the versions that were submitted during the peer review process. They are not the versions of record or the final published versions. They should not be cited or distributed as the published version of this manuscript.

BMJ Open is an open access journal and the full, final, typeset and author-corrected version of record of the manuscript is available on our site with no access controls, subscription charges or pay-per-view fees (<http://bmjopen.bmj.com>).

If you have any questions on BMJ Open's open peer review process please email [info.bmjopen@bmj.com](mailto:info.bmjopen@bmj.com)

# BMJ Open

## Growing need, growing complexity: projections of palliative care need and multimorbidity in Scotland

|                               |                                                                                                                                                                                                                                                                                                                                                                                                                                                                                                                                                                                                                                                                                                                                             |
|-------------------------------|---------------------------------------------------------------------------------------------------------------------------------------------------------------------------------------------------------------------------------------------------------------------------------------------------------------------------------------------------------------------------------------------------------------------------------------------------------------------------------------------------------------------------------------------------------------------------------------------------------------------------------------------------------------------------------------------------------------------------------------------|
| Journal:                      | <i>BMJ Open</i>                                                                                                                                                                                                                                                                                                                                                                                                                                                                                                                                                                                                                                                                                                                             |
| Manuscript ID                 | bmjopen-2020-041317                                                                                                                                                                                                                                                                                                                                                                                                                                                                                                                                                                                                                                                                                                                         |
| Article Type:                 | Original research                                                                                                                                                                                                                                                                                                                                                                                                                                                                                                                                                                                                                                                                                                                           |
| Date Submitted by the Author: | 04-Jun-2020                                                                                                                                                                                                                                                                                                                                                                                                                                                                                                                                                                                                                                                                                                                                 |
| Complete List of Authors:     | <p>Finucane, Anne; Marie Curie Hospice Edinburgh, Research; The Usher Institute of Population Health Sciences and Informatics, University of Edinburgh</p> <p>Bone, Anna; King's College London, Cicely Saunders Institute of Palliative Care, Policy and Rehabilitation</p> <p>Etkind, Simon ; King's College London, Carr, David; Public Health Scotland</p> <p>Meade, Richard; Marie Curie, Policy</p> <p>Munoz-Arroyo, Rosalia; Public Health Scotland</p> <p>Iyayi-igbinovia, Aghimien; Public Health Scotland</p> <p>Moine, Sébastien ; University of Edinburgh</p> <p>Evans, Catherine ; King's College London, Higginson, Irene; Kings College London, Palliative Care and Policy</p> <p>Murray, Scott; University of Edinburgh</p> |
| Keywords:                     | Adult palliative care < PALLIATIVE CARE, PUBLIC HEALTH, Health policy < HEALTH SERVICES ADMINISTRATION & MANAGEMENT, GERIATRIC MEDICINE, Dementia < NEUROLOGY                                                                                                                                                                                                                                                                                                                                                                                                                                                                                                                                                                               |
|                               |                                                                                                                                                                                                                                                                                                                                                                                                                                                                                                                                                                                                                                                                                                                                             |

SCHOLARONE™  
Manuscripts

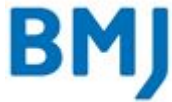

I, the Submitting Author has the right to grant and does grant on behalf of all authors of the Work (as defined in the below author licence), an exclusive licence and/or a non-exclusive licence for contributions from authors who are: i) UK Crown employees; ii) where BMJ has agreed a CC-BY licence shall apply, and/or iii) in accordance with the terms applicable for US Federal Government officers or employees acting as part of their official duties; on a worldwide, perpetual, irrevocable, royalty-free basis to BMJ Publishing Group Ltd ("BMJ") its licensees and where the relevant Journal is co-owned by BMJ to the co-owners of the Journal, to publish the Work in this journal and any other BMJ products and to exploit all rights, as set out in our [licence](#).

The Submitting Author accepts and understands that any supply made under these terms is made by BMJ to the Submitting Author unless you are acting as an employee on behalf of your employer or a postgraduate student of an affiliated institution which is paying any applicable article publishing charge ("APC") for Open Access articles. Where the Submitting Author wishes to make the Work available on an Open Access basis (and intends to pay the relevant APC), the terms of reuse of such Open Access shall be governed by a Creative Commons licence – details of these licences and which [Creative Commons](#) licence will apply to this Work are set out in our licence referred to above.

Other than as permitted in any relevant BMJ Author's Self Archiving Policies, I confirm this Work has not been accepted for publication elsewhere, is not being considered for publication elsewhere and does not duplicate material already published. I confirm all authors consent to publication of this Work and authorise the granting of this licence.

# Growing need, growing complexity: projections of palliative care need and multimorbidity in Scotland

## Authors

Anne M. Finucane

Research Lead

Marie Curie Hospice Edinburgh,

45 Frogston Road West,

Scotland,

UK.

Second affiliation: Usher Institute, University of Edinburgh, Scotland, UK.

Email: [Anne.finucane@mariecurie.org.uk](mailto:Anne.finucane@mariecurie.org.uk)

Anna E. Bone

Research Associate

King's College London,

Cicely Saunders Institute of Palliative Care, Policy and Rehabilitation,

Bessemer Road, Denmark Hill,

London SE5 9PJ,

UK

Email: [anna.bone@kcl.ac.uk](mailto:anna.bone@kcl.ac.uk)

Simon Etkind

Visiting Researcher

King's College London,

Cicely Saunders Institute of Palliative Care, Policy and Rehabilitation,

Bessemer Road, Denmark Hill,

London SE5 9PJ,

UK

Email: [simon.etkind@kcl.ac.uk](mailto:simon.etkind@kcl.ac.uk)

Second affiliation: Specialist registrar in palliative medicine, Guy's and St Thomas' NHS Foundation Trust, London, UK

David Carr

Senior Information Analyst

Public Health Scotland

Meridian Court,

5 Cadogan Street,

Glasgow G2 6QE

Scotland, UK

E-mail: [david.carr9@nhs.net](mailto:david.carr9@nhs.net)

1  
2  
3 Richard Meade  
4 Head of Policy and Public Affairs for Scotland  
5  
6 Marie Curie,  
7 Edinburgh,  
8 Scotland,  
9  
10 UK  
11 Email: Richard.Meade@mariecurie.org.uk  
12

13 Rosalia Munoz-Arroyo,  
14 Principal Information Analyst  
15 Public Health Scotland  
16 Meridian Court,  
17 5 Cadogan Street,  
18 Glasgow G2 6QE  
19 Scotland, UK  
20  
21 Email: rosalia.munoz-arroyo@nhs.net  
22

23  
24 Sebastien Moine  
25 Visiting Fellow,  
26 Usher Institute,  
27 University of Edinburgh,  
28 Scotland, UK  
29  
30 Email: sebastien.moine.75@gmail.com  
31

32  
33 Aghimien Iyayi-Igbinovia,  
34 Principal Information Analyst  
35 Public Health Scotland  
36 Meridian Court,  
37 5 Cadogan Street,  
38 Glasgow G2 6QE  
39 Scotland, UK  
40  
41 Email: aghimien.iyayi-igbinovia@nhs.net  
42

43  
44 Catherine J. Evans  
45 HEE/NIHR Senior Clinical Lecturer in Palliative Care,  
46 King's College London,  
47 Cicely Saunders Institute of Palliative Care, Policy and Rehabilitation,  
48 Bessemer Road, Denmark Hill,  
49 London SE5 9PJ,  
50  
51 UK  
52  
53 Email: Catherine.evans@kcl.ac.uk  
54  
55  
56  
57  
58  
59  
60

1  
2  
3 Irene J. Higginson  
4 Professor of Palliative Care  
5 King's College London,  
6 Cicely Saunders Institute of Palliative Care, Policy and Rehabilitation,  
7 Bessemer Road, Denmark Hill,  
8 London SE5 9PJ,  
9 UK  
10 Email: irene.higginson@kcl.ac.uk  
11  
12  
13  
14

15 Scott A. Murray  
16 Emeritus Professor of Primary Palliative Care  
17 Usher Institute,  
18 University of Edinburgh,  
19 Scotland,  
20 UK  
21 Email: scott.murray@ed.ac.uk  
22  
23  
24  
25  
26  
27

28 **Corresponding author: Anne M. Finucane.**

29 Email: [Anne.finucane@mariecurie.org.uk](mailto:Anne.finucane@mariecurie.org.uk)  
30  
31  
32  
33  
34  
35  
36  
37  
38  
39  
40  
41  
42  
43  
44  
45  
46  
47  
48  
49  
50  
51  
52  
53  
54  
55  
56  
57  
58  
59  
60

## Abstract

### Objective

To estimate future palliative care need and complexity of need in Scotland, and to identify priorities for future service delivery.

### Design

We estimated the prevalence of palliative care need by analysing the proportion of deaths from defined chronic progressive illnesses. We described linear projections up to 2040 using national death registry data and official mortality forecasts. An expert consultation and subsequent online consensus survey generated recommendations on meeting future palliative care need.

### Setting

Scotland, population of 5.4m.

### Participants

All decedents in Scotland over 11 years (2007-2017). The consultation had 34 participants; 24 completed the consensus survey.

### Primary and secondary outcomes

Estimates of past and future palliative care need in Scotland from 2007 up to 2040.

Multimorbidity was operationalised as two or more registered causes of death from different disease groups (cancer, organ failure, dementia, other). Consultation and survey data were analysed descriptively.

### Results

We project that by 2040, the number of people requiring palliative care will increase by at least 14%; and by 20% if we factor in multimorbidity. The number of people dying from

1  
2  
3 multiple diseases associated with different disease groups is projected to increase from 27%  
4  
5 of all deaths in 2017 to 43% by 2040. To address increased need and complexity, experts  
6  
7 prioritised sustained investment in a national digital platform, roll-out of integrated electronic  
8  
9 health and social care records; and approaches that remain person-centred.  
10  
11  
12  
13  
14

## 15 **Conclusions**

16  
17 By 2040 more people in Scotland are projected to die with palliative care needs, and the  
18  
19 complexity of need will increase markedly. Service delivery models must adapt to serve  
20  
21 growing demand and complexity associated with dying from multiple diseases from different  
22  
23 disease groups. We need sustained investment in secure, accessible, integrated and person-  
24  
25 centred health and social care digital systems, to improve care co-ordination and optimise  
26  
27 palliative care for people across care settings.  
28  
29  
30  
31  
32  
33  
34

## 35 **Keywords**

36  
37 Forecasting, multimorbidity, palliative care, needs assessment, chronic disease, aging, frailty,  
38  
39 health policy  
40  
41  
42  
43  
44  
45  
46  
47  
48  
49  
50  
51  
52  
53  
54  
55  
56  
57  
58  
59  
60



### Strengths and limitations of this study

- First study to project population mortality for people dying from two or more diseases from different disease groups.
- First study to project estimates of future palliative care need for Scotland.
- Used a range of estimation methods accounting for both underlying and contributory causes of deaths, to produce robust projections.
- The expert consultation, including public and patient representatives, and consensus method ensured implications of the quantitative findings are grounded in policy practice.
- Models draw on trends over an 11-year period and project these trends forward.
- Estimates did not adjust for the impact of the COVID-19 pandemic on mortality risks for older populations and people with underlying health conditions. Although, the longer-term effects of the pandemic on morbidity and mortality trends is unknown, these are anticipated to wane over time and are not likely to alter the main conclusions of this paper.

## Background

Worldwide, deaths are expected to rise from 55 million in 2016 to 75 million by 2040<sup>1</sup>. Non-communicable diseases accounted for 72% of global deaths in 2016, and are forecast to account for 81% of deaths by 2040.<sup>1</sup> Globally, the proportion of people aged 80 or over increased by 76.5% between 2000 and 2015.<sup>2</sup> The growing number of older people and increased prevalence of chronic conditions indicate that more people would benefit from a palliative approach to care over the next two decades.

Demographic changes and shifts in disease patterns at a national level will impact population palliative care need. An analysis based on data from 2006 to 2014 in England and Wales projected that up to 87.6% of people who die could benefit from palliative care by 2040.<sup>3</sup> In Ireland, a similar analysis based on data from 2007 to 2015 projected that palliative care need will increase, and will be indicated for 83% of those who die by 2046.<sup>4</sup> However, existing projection studies use data based on 'main underlying cause of death' only, excluding people who may have had a contributory cause of death (but not a main underlying cause) associated with palliative care need. For instance, population palliative care need estimates using 'main underlying cause of death' would only include people who died from Alzheimer's disease when it is listed as the 'main underlying cause' on their death certificate. Models that use data on 'main underlying cause of death' may therefore underestimate the true extent of population palliative care need; models that incorporate both main underlying and contributory causes of death are required.

Increased longevity in developed and developing countries comes with greater multimorbidity. Multimorbidity describes the co-existence of two or more chronic conditions which may be a physical non-communicable disease, a mental health condition or infectious

1  
2  
3 disease of long duration.<sup>5 6</sup> Data from Scotland has shown that 65% of people aged 65 to 84  
4  
5 years have two or more long term disorders; rising to 81.5% for people aged 85 and over.<sup>7</sup>  
6  
7 Only 5.3% of people with dementia have no other long term disorder.<sup>8</sup> Despite the  
8  
9 recognition that multimorbidity is the norm in high income countries,<sup>5</sup> there has been little  
10  
11 consideration of the implications for palliative care. To inform future palliative care service  
12  
13 design, there is a need to better understand multimorbidity due to the presence of advanced  
14  
15 progressive diseases. As a starting point, we need estimates of the number of people dying  
16  
17 from multiple diseases associated with palliative care need now and in the future.  
18  
19  
20  
21  
22  
23

24 The aim of this study was to estimate, and project future palliative care need and complexity  
25  
26 of need in Scotland up to 2040. Extending previous work, we sought to estimate and project  
27  
28 the number of people dying from more than one disease associated with palliative care need.  
29  
30 Furthermore, we planned an expert consultation and consensus survey to generate  
31  
32 recommendations for future palliative care service delivery. This novel analysis sought to  
33  
34 provide a more comprehensive picture of future palliative care need and complexity of need  
35  
36 than previously described.  
37  
38  
39  
40  
41  
42  
43  
44

## 45 **Methods**

### 48 **Design**

49  
50  
51 Mixed methods consisting of: i) simple linear modelling of routinely available national death  
52  
53 registry data and mortality projections for Scotland; ii) expert consultation and online  
54  
55 consensus survey to generate recommendations for service design and delivery based on our  
56  
57 projections.  
58  
59  
60

## Setting

Scotland, a high-income Western European country with a population of 5.4 million; 57,870 people died in 2017.<sup>9</sup> Mortality forecasts project that annual deaths will increase by 13.6% to 65,756 by 2040.<sup>10</sup>

## Data sources

**Deaths by age, gender and cause 2007 to 2017.** We obtained aggregate level data on deaths by age, gender and cause for an 11-year period (2007-2017 inclusive) from Public Health Scotland (previously known as Information Services Division (ISD) Scotland). The aggregate data were derived from the National Records of Scotland (NRS) individual-level deaths database held by Public Health Scotland.

**Mortality projections** for Scotland are published by the Office for National Statistics.<sup>10</sup> The mortality projections used in this analysis were based on the 2016 principal population projections for Scotland up to 2040. We used projections up to 2040 to allow comparison with studies in other countries.

## Generating estimates of population palliative care need

Palliative care need at a population level has been estimated using a variety of methods. Gomez-Batiste et al. estimated that 75% of all those who die have palliative care needs.<sup>11</sup> Other approaches use disease specific mortality data and identify diseases using International Classification of Disease codes (ICD-10) that are associated with palliative care need to generate estimates.<sup>12 13</sup> Murtagh et al. estimated that in high income countries 63% to 97% of people who die might benefit from palliative care depending on the estimation method used.<sup>13</sup>

1  
2  
3 Based on this previous work, we estimated and projected palliative care need in three ways  
4  
5 as described below.  
6  
7  
8  
9

### 10 11 ***Estimation Method 1: 75% of all deaths*** 12

13  
14 Method 1 is based on that used by Gomez-Batiste et al.<sup>11</sup> It assumes that 75% of people in  
15  
16 high-income countries die from chronic progressive diseases with evolving and increasing  
17  
18 healthcare needs. Consequently, 75% of people at the end of life may benefit from a  
19  
20 palliative care approach, irrespective of whether that is delivered by palliative care specialists  
21  
22 or other health professionals. We calculated palliative care need as 75% of all deaths in  
23  
24 2017, and projected this proportion up to 2040, assuming the proportion of deaths requiring  
25  
26 palliative care would remain constant at 2017 levels.  
27  
28  
29  
30  
31  
32  
33

### 34 ***Estimation Method 2: Palliative care need based on ICD-10 codes associated with main*** 35 36 ***underlying cause of death*** 37 38

39  
40 Method 2 takes a diagnosis-based approach, applying ICD-10 diagnostic codes previously  
41  
42 used to estimate population palliative care need (Supplementary file 1).<sup>3 13</sup> To project future  
43  
44 palliative care need, we modelled two scenarios (2A and 2B). For Method 2A we calculated  
45  
46 the number and proportion of age and gender specific deaths in 2017 where an ICD-10 code  
47  
48 associated with palliative care was recorded as the main underlying cause of death, then  
49  
50 applied this proportion to mortality forecasts for each year up to 2040, with no adjustments.  
51  
52 For Method 2B we calculated the mean annual change in the proportion of deaths requiring  
53  
54 palliative care between 2007 and 2017. We assumed the mean annual change would continue  
55  
56 in a linear fashion and applied the resulting proportion to mortality forecasts up to 2040. We  
57  
58  
59  
60

1  
2  
3 chose Method 2B for sub-analyses projecting future needs by age and disease group as it  
4 enabled comparison with data reported in other published studies.<sup>3 4</sup>  
5  
6  
7  
8  
9

10  
11 ***Estimation Method 3: Palliative care need based on ICD-10 codes associated with main***  
12  
13 ***underlying and all contributory cause(s) of death***  
14  
15

16 Method 3 adopts a diagnostic based approach, using the same ICD-10 diagnostic codes  
17 outlined in Method 2 to estimate the number of people dying from diseases associated with  
18 palliative care need. However, for Method 3, our estimate of palliative care need was the  
19 number of people for whom a palliative care relevant disease was recorded as *either* the main  
20 underlying cause of death, or a contributory cause. Thus, Method 3 provides the least  
21 conservative estimate of deaths associated with palliative care need in a calendar year. To  
22 project future need using Method 3, we calculated the number and proportion of age and  
23 gender specific deaths from 2007 to 2017 where an ICD-10 code associated with palliative  
24 care was recorded as *either* the main underlying or contributory cause of death. As for  
25 Method 2B we assumed the mean annual change in the proportion of deaths associated  
26 with palliative care need over the baseline period would continue to occur in a linear  
27 fashion, and applied the resulting mean annual change to mortality forecasts up to 2040.  
28  
29  
30  
31  
32  
33  
34  
35  
36  
37  
38  
39  
40  
41  
42  
43  
44  
45  
46  
47

48 **Defining, estimating, and projecting multimorbidity associated with advanced**  
49 **progressive diseases**  
50  
51

52 We wanted to estimate and project the number of people dying from multimorbidity  
53 associated with palliative care need. Given that some diseases are closely related and may  
54 represent similar disease processes (e.g. related cancers), we chose to define multimorbidity  
55  
56  
57  
58  
59  
60

1  
2  
3 as people dying from two or more diseases associated with palliative care need from more  
4 than one of four disease groups - cancer, organ failure, dementia or other (includes  
5 neurological conditions and stroke). This definition indicates care complexity, given the  
6 distinct illness trajectories, needs and configuration of services associated with diseases from  
7 each group, which when experienced together greatly increase symptom burden and need for  
8 care co-ordination. To generate this estimate we calculated the mean annual change in the  
9 proportion of deaths due to two or more diseases from different disease groups over the 11-  
10 year period. We assumed the mean annual change would continue to occur in a linear  
11 fashion and applied the resulting mean annual change in the proportion of deaths  
12 associated with diseases from different disease groups to mortality forecasts up to 2040.  
13  
14  
15  
16  
17  
18  
19  
20  
21  
22  
23  
24  
25  
26  
27  
28

### 29 **Expert consultation and consensus survey**

30  
31 We used an abbreviated MORECare Transparent Expert Consultation (TEC) event consisting  
32 of a modified nominal group technique to generate recommendations, and subsequent  
33 consensus survey to rank and ascertain consensus on each recommendation for the future  
34 delivery of palliative care.<sup>14</sup> A purposive sample of approximately 50 stakeholders from  
35 palliative care, primary care and social care along with commissioners, service providers,  
36 government representatives, researchers, patient/ carer groups and charities were invited to  
37 take part. Four multidisciplinary groups discussed the palliative care need projections,  
38 critical issues emerging from the data, and then generated recommendations in response.  
39  
40 Participants received a follow-up survey by email based on the data generated at the event  
41 asking them to rate the extent to which they agreed with recommendations from one to nine  
42 (strongly disagree to strongly agree), using free-text spaces to add comments explaining their  
43 judgements. One completion reminder was sent after two weeks.  
44  
45  
46  
47  
48  
49  
50  
51  
52  
53  
54  
55  
56  
57  
58  
59  
60

1  
2  
3 Survey data was analysed in MS EXCEL using descriptive statistics. Informed by guidance  
4 on consensus methods,<sup>15</sup> we categorised each recommendation as follows to ascertain level  
5 of agreement for each statement: scores of 1-3 (recommendation not indicated), 4 – 6  
6 (equivocal) and 7 to 9 (recommendation indicated). We then examined the dispersion of  
7 scores for each statement to determine degree of consensus. Where the interquartile range  
8 fell within each 3-point region outlined we judged there to be ‘*close agreement*’ for the  
9 recommendation; but where ratings fell across each of these regions, we judged that there  
10 was ‘*broad agreement*’.

### 23 **Patient and public involvement (PPI)**

24 A member of the Marie Curie Voices group (patient and carer representative group)  
25 participated in the expert consultation and survey and shared his perspectives on the meaning  
26 of the findings for patient and family care at the expert consultation event. Three PPI  
27 representatives from the Marie Curie Voices group commented on the draft manuscript and  
28 survey findings. These comments were used to inform study implications.  
29  
30  
31  
32  
33  
34  
35  
36  
37  
38  
39

### 40 **Reporting guidelines**

41 We used the Strengthening the Reporting of Observational Studies in Epidemiology  
42 guidelines to inform reporting (see online supplementary file 1).  
43  
44  
45  
46  
47  
48

### 49 **Ethical approval**

50 For the trend analysis, we used anonymised, aggregate level data, generated by Public Health  
51 Scotland; consequently, ethical approval was not required. The Usher Research Ethics  
52 Committee at the University of Edinburgh approved the expert consultation and consensus  
53 survey (No: 1938).  
54  
55  
56  
57  
58  
59  
60



## RESULTS

### Estimated palliative care need in Scotland 2007 to 2017

During this 11 year period, registered deaths in Scotland rose by 3.4% (55,984 to 57,870).<sup>9</sup>

Using various methods to estimate population level palliative care need, we estimated that the number of people who died with palliative care needs in Scotland in 2017 ranged from 43,403 (Method 1) to 52,148 (Method 3), an increase from 2007 irrespective of method used (Table 1).

### Projections of population level palliative care need in Scotland from 2018 to 2040

Deaths in Scotland are projected to reach 65,756 by 2040, a 13.6% increase from 2017.<sup>16</sup>

Irrespective of the projection method used, the number of people dying of a disease associated with palliative care need is projected to increase. By 2040, we estimate that between 74% and 95% of those who die might benefit from a palliative care approach (Table 1).

Table 1: Number and percentage of people who die with palliative care (PC) needs in Scotland based on different estimation and projection methods

| Projection Method | Description                                                                                                                         | 2007<br>No. of deaths<br>with PC need<br>(total deaths<br>55,984) | 2007<br>% of all<br>deaths<br>with PC<br>need | 2017<br>No. of deaths<br>with PC need<br>(total deaths<br>57,870) | 2017<br>% of all<br>deaths<br>with PC<br>need | 2030<br>No. of deaths<br>with PC need<br>(projected<br>deaths 60,310) | 2030<br>% of all<br>deaths<br>with PC<br>need | 2040<br>No. of projected<br>deaths with PC<br>needs<br>(projected deaths<br>65,756) | 2040<br>% of all<br>projected<br>deaths<br>with PC<br>need |
|-------------------|-------------------------------------------------------------------------------------------------------------------------------------|-------------------------------------------------------------------|-----------------------------------------------|-------------------------------------------------------------------|-----------------------------------------------|-----------------------------------------------------------------------|-----------------------------------------------|-------------------------------------------------------------------------------------|------------------------------------------------------------|
| 1                 | 75% of all deaths                                                                                                                   | 41,988                                                            | 75%                                           | 43,403                                                            | 75%                                           | 45,233                                                                | 75%                                           | 49,317                                                                              | 75%                                                        |
| 2A                | ICD-10 codes associated with <b>underlying cause of death only</b> , assuming proportion of palliative care needs remains constant  | 41,310                                                            | 74%                                           | 42,816                                                            | 74%                                           | 44,912                                                                | 74%                                           | 48,869                                                                              | 74%                                                        |
| 2B                | ICD-10 codes associated with <b>underlying cause of death only</b> , assuming an annual change based on annual change 2007-17       | 41,310                                                            | 74%                                           | 42,816                                                            | 74%                                           | 45,256                                                                | 75%                                           | 50,084                                                                              | 76%                                                        |
| 3                 | ICD codes associated with <b>underlying OR contributory cause of death</b> assuming an annual change based on annual change 2007-17 | 49,476                                                            | 88.0%                                         | 52,148                                                            | 90%                                           | 56,033                                                                | 93%                                           | 62,757                                                                              | 95%                                                        |

### Projections of palliative care need by age group up to 2040

Based on projection method 2B, the number of people who die aged 0 to 74 years with palliative care needs is projected to fall, while those aged 75 and over will increase (Figure 1). The greatest increase will occur for those aged 85 and above. People aged 85 or older will account for just under half (47%) of those dying with palliative care needs by 2040 (23,491 of 50,084 projected deaths associated with palliative care need).

**Insert Figure 1 about here.**

**Figure 1: Projected estimates of the number of people dying in Scotland with palliative care needs by age up to 2040 using method 2B**

*Note: Data for 2007 and 2017 is actual deaths; data for 2030 and 2040 is projected deaths based on method 2B.*

### Projections of underlying cause of death by disease group up to 2040

Based on projection method 2B, deaths with cancer as the main underlying cause of death are projected to rise from 16,203 in 2017 to 19,535 in 2040 (21% increase). Deaths where dementia is the main underlying cause of death are projected to rise from 6,776 in 2017 to 19,284 (185% increase); while deaths from organ failure are projected to continue to fall (from 14,928 in 2017 to 9,957 by 2040) as are deaths from other conditions requiring palliative care (4,909 in 2017 to 1,668 in 2040) (Figure 2).

**Insert Figure 2 about here.**

**Figure 2: Projected underlying cause of death associated with palliative care need by disease group up to 2040 using method 2B**

*Note: Data for 2007 and 2017 is actual deaths; data for 2030 and 2040 is projected deaths based on method 2B.*

## **Proportion of people dying with multimorbidity associated with advanced progressive diseases across different disease groups**

In 2017, overall, 15,725 people died with multimorbidity, i.e. at least two diseases associated with palliative care need from different disease groups (27.2% of all deaths). The number of people projected to die with multimorbidity is projected to increase by 82% to 28,629 by 2040, accounting for 43.5% of all deaths or 45.6% of all palliative care deaths using projection method 3 (Figure 3). The proportion of those who die with multimorbidity is projected to increase by 60% (27.2% to 43.5%). The increases will mainly occur for those in the older age groups (Figure 4). If current trends continue, by 2040, we project that 52% of those aged 85-99 will die from two or more diseases associated with palliative care need from different disease groups.

### **Insert Figure 3 about here**

**Figure 3: Projected number and percentage of people in Scotland dying from multimorbidity associated with palliative care need, 2017 to 2040**

*Note: Data for 2007 and 2017 is actual deaths; data for 2030 and 2040 is projected deaths.*

### **Insert Figure 4 about here.**

**Figure 4: Projected number of people in Scotland dying from multimorbidity associated with palliative care need by age, 2017 to 2040**

*Note: Data for 2007 and 2017 is actual deaths; data for 2030 and 2040 is projected. Given the small number of deaths, the data for the 0-44 age group are too small to be visible.*

## Expert consultation and consensus survey

34 participants participated in the consultation (Supplementary file 1) and 24 completed the follow-up online survey (70.5% response rate). Following de-duplication and synthesis of initial consultation data, 33 potential recommendations relating to nine areas were identified and included in the online survey (Supplementary file 1). Two participants were judged to have misunderstood the survey rating scale as their agreement scores were in the opposite direction of their free-text comments; these were excluded.

There was close or broad agreement that 32 of the 33 proposed recommendations across all nine areas are indicated (Supplementary file 1). Recommendations relating to digital health and person-centred care scored most highly. Agreement scores were highest for: investment in a national digital health platform (M = 8.5, SD = 0.7); roll-out of shared electronic health and social care records across all settings so they can be accessed by all relevant care professionals as well as the patients themselves (M = 8.5, SD = 0.9), prioritising the patient or family perspective when providing services to meet their needs (M = 8.5, SD = 1.0) and encouraging systems promoting person centred as opposed to task oriented care (M = 8.3, SD = 1.1).

## Discussion

### Principal findings

This study projects an estimate of palliative care need in Scotland, showing that between 14% (method 2) and 20% (method 3) more people may need palliative care by 2040. Cancer and dementia will increase as the main underlying causes of death. For the first time, we project

1  
2  
3 multimorbidity associated with palliative care needs, operationalised as the proportion of  
4 people dying from multiple chronic progressive diseases across different disease groups. We  
5 show that this proportion will rise by 60%, accounting for nearly half of all palliative care  
6 deaths (46%) by 2040. Over half of those aged between 85 and 89 are projected to die from  
7 multimorbidity associated with palliative care need, indicating increased complexity of needs.  
8 Experts recommended sustained investment in digital systems to improve care coordination,  
9 alongside prioritisation of person-centred approaches.

### 10 11 12 13 14 15 16 17 18 19 20 **Strengths and weaknesses**

21  
22  
23 We used a range of estimation methods accounting for both main underlying and contributory  
24 causes of deaths, which increases the robustness of our findings to inform policy and practice.  
25 However, the projections outlined here are not a forecast, rather they are projections of what  
26 may occur under different assumptions, based on data available at the time of analysis. We  
27 used a disease count approach to estimate multimorbidity relevant to population palliative  
28 care need as this is straight-forward to estimate and replicate. Alternative approaches based  
29 on multimorbidity indices are increasingly common,<sup>17</sup> though cannot be used with cause of  
30 death data alone. Our definition of multimorbidity was relatively restrictive – decedents were  
31 required to have two major illnesses from different disease groups both of which would  
32 individually confer palliative care need. This definition better captures complexity at the end-  
33 of-life and increases the consequence of our finding that multimorbidity will rapidly increase.  
34 Our models draw on trends over an 11-year period up to and including 2017 and project these  
35 trends forward. We have drawn on death registry data that relies on accurate completion of  
36 death certificates. We cannot account for changes in how cause of death is recorded over  
37 time, though previous changes have had minor impact on population level coding.<sup>18</sup> Nor can  
38 we account for changes in medical treatments that may change the distribution of deaths by  
39 underlying cause in the future. Significant advances in the treatment of cancer or dementia  
40  
41  
42  
43  
44  
45  
46  
47  
48  
49  
50  
51  
52  
53  
54  
55  
56  
57  
58  
59  
60

1  
2  
3 might result in lower numbers dying from these diseases than is currently projected. We also  
4  
5 need to be prepared for more sudden increases in mortality as we have seen with COVID-19.  
6  
7 Our estimates make no adjustment for the ongoing COVID-19 pandemic which has  
8  
9 particularly affected people aged 75 or over who accounted for 76% of the 3,546 COVID-  
10  
11 related deaths registered in Scotland by 17 May 2020.<sup>19</sup> Excess deaths relating to, but not  
12  
13 directly caused by, COVID-19 have also occurred. The long-term consequences of the virus  
14  
15 are not yet known though recovery for some is often slow and may result in longer lasting  
16  
17 morbidities. This spike in deaths may be followed by changes in age-specific mortality rates  
18  
19 in following months and years. We judge that the impact of this will not change the main  
20  
21 conclusions of this paper, that the need for palliative care will significantly rise over the next  
22  
23 20 years, with the number of people dying with complex needs increasing markedly.  
24  
25  
26  
27  
28

### 29 **Findings in relation to existing evidence**

30  
31  
32 Our findings that palliative care need in Scotland is projected to increase by 2040 reflect  
33  
34 findings from other population palliative care projections in England and Wales<sup>3</sup> and  
35  
36 Ireland.<sup>4</sup> As in these studies, in Scotland we projected that the greatest increase in palliative  
37  
38 care need will be for people aged 85 and above, reflecting an ageing population in each  
39  
40 country. As for England and Wales,<sup>3</sup> deaths where cancer and dementia is the main  
41  
42 underlying cause are projected to increase while the numbers dying from organ failure as the  
43  
44 main underlying cause are projected to fall. We extended previous work, by modelling future  
45  
46 palliative care need using both main underlying cause of death and contributory causes  
47  
48 (Model 3). Examining both main underlying and contributory causes of death we estimated  
49  
50 that in 2017, 90% of all deaths were associated with palliative care need, and that this is  
51  
52 projected to increase to 95% by 2040. These higher estimates are aligned with the maximal  
53  
54 estimates reported by Murtagh colleagues, who also used contributory cause of death to  
55  
56 estimate palliative care in England and Wales for 2006 to 2008.<sup>13</sup> In contrast to more  
57  
58  
59  
60

1  
2  
3 conservative estimates based on main underlying cause only, our findings show that the vast  
4 majority of people dying now, and in the future, may benefit from a palliative care approach.  
5  
6  
7  
8  
9

### 10 11 **Implications for clinicians, service managers and policymakers** 12

13  
14 Multimorbidity is becoming the norm, starting earlier in the life course and rising steeply  
15 with age.<sup>7 20</sup> It is widely recognised that health and social care services need to move away  
16 from a focus on care of people with single diseases towards systems that meet the needs of  
17 people with multiple diseases.<sup>6 21</sup> Palliative care services also need to adapt. The hospice  
18 model is still based predominantly on care of people with a primary diagnosis of cancer;<sup>22</sup>  
19 specialist services need to evolve to that take account of multimorbidity and the associated  
20 symptom burden and uncertainty as end of life approaches. Dementia is increasingly  
21 common and previous research has shown that mental health comorbidities frequently occur  
22 alongside physical comorbidities.<sup>7</sup> The palliative care service needs of patients or family  
23 members with dementia or mental health conditions need to be explicitly considered as new  
24 services are designed. More people are expected to die in care homes over the next two  
25 decades, and care homes may become the most common place of death in England and Wales  
26 by 2040.<sup>23 24</sup> Multimorbidity, including dementia, is common amongst residents.<sup>25-27</sup> Models  
27 whereby specialist palliative care services support care homes to identify and provide  
28 palliative care for residents approaching end of life, alongside the broad expertise from  
29 multiple disciplines, need to be commonplace.  
30  
31  
32  
33  
34  
35  
36  
37  
38  
39  
40  
41  
42  
43  
44  
45  
46  
47  
48  
49  
50

51  
52 Primary care providers will be trained as ‘expert generalists’<sup>21</sup> and will work more closely  
53 with palliative care specialists to enhance communication and coordination across the health  
54 and social care system. Electronic care co-ordination systems are vital to support co-  
55 ordinated care, enabling the sharing of key clinical information and personal preferences  
56  
57  
58  
59  
60



1  
2  
3 across all care settings and unscheduled care services; sustained investment in these systems  
4 is a priority.<sup>28 29</sup> As identified previously,<sup>30-32</sup> there is a need for palliative care education  
5 and training for non-specialist health and social care workers in all settings. Training and  
6 education in the challenges of caring for people dying with multimorbidity is required. This  
7 might usefully involve exposure to primary care, geriatrics, mental health and dementia  
8 care.<sup>33</sup> As found previously,<sup>24</sup> greater investment in increasing and retaining the community  
9 health and social care workforce to meet the projected increases in palliative care need is  
10 recommended.  
11  
12  
13  
14  
15  
16  
17  
18  
19  
20  
21  
22  
23  
24

### 25 **Unanswered questions and future research**

26  
27  
28 Research on dying from multiple chronic diseases requiring palliative care input is needed –  
29 which combinations of diseases are most prevalent, and how well served are those who die  
30 from multimorbidity compared to those with a single or dominant illness. Research focusing  
31 on the co-existence of mental health disorders with physical disorders at the end of life was  
32 not addressed here but needs to be prioritised in the future. We also need to better understand  
33 how well equipped health and social care professionals are to care for people with  
34 multimorbidity at the end of life; what types of care models are needed; what education,  
35 training and support is required, and for whom. Since the COVID-19 pandemic, research is  
36 required to examine the extent to which COVID-19 has influenced mortality trends and  
37 future projections of palliative care need across the UK.  
38  
39  
40  
41  
42  
43  
44  
45  
46  
47  
48  
49  
50  
51  
52  
53  
54  
55  
56  
57  
58  
59  
60

## Conclusion

By 2040, we project that many more people in Scotland will die with palliative care needs, particularly in the oldest age groups, and care complexity will increase. Current models of palliative care must adapt to meet increased need amongst those aged 85 and over, most dying from multiple diseases, often including dementia. There is a need for sustained investment in a national digital health and social care system, that remains person centred, to improve care co-ordination and optimise palliative care for people wherever they reside.

1  
2  
3 **Author contributions:** AMF, RM, AEB and SE conceived the study. AMF obtained the  
4 funding. All authors were involved in study design. DC, RMA and AA sourced the data.  
5  
6 DC undertook the data analysis under the supervision of AMF, AEB, SE and RMA. AMF  
7  
8 wrote the first draft of the manuscript, with all authors contributing to the subsequent and  
9  
10 final drafts.  
11  
12  
13  
14

15  
16 **Funding statement:** This work was supported by a grant from Marie Curie. The posts of  
17  
18 AMF and RM are funded by Marie Curie. AEB is supported by Cicely Saunders International  
19  
20 and the Dunhill Medical Trust. CJE is funded by HEE/NIHR Senior Clinical Lectureship  
21  
22 (ICA-SCL-2015-01-001). The views expressed are those of the author(s) and not necessarily  
23  
24 those of the NIHR, the Department of Health and Social Care, Cicely Saunders International,  
25  
26 Dunhill Medical Trust or Marie Curie.  
27  
28  
29

30  
31 **Competing Interests:** None declared  
32  
33

34 **Patient consent:** Not required  
35  
36

37 **Data sharing statement:** Additional data can be accessed in the Supplementary File 2. Any  
38  
39 queries about Public Health Scotland data sources should be directed to Rosalia Munoz-  
40  
41 Arroyo at [rosalia.munoz-arroyo@nhs.net](mailto:rosalia.munoz-arroyo@nhs.net).  
42  
43  
44

45 **Acknowledgements:** We are particularly grateful to Dr Kirsty Boyd for assistance with the  
46  
47 expert consultation, and for commenting on a draft of this manuscript. We are very grateful  
48  
49 to Harry Bunch (HB), Diana Robinson (DR) and Peter Buckle (PB), members of the Marie  
50  
51 Curie Voices group, for PPI input. We thank the participants in our expert consultation for  
52  
53 contributions at the expert consultation and for completing the follow-up survey. Special  
54  
55 thanks to Dr Peter May at Trinity College Dublin for assisting at our consultation.  
56  
57  
58  
59  
60

## References

1. Foreman KJ, Marquez N, Dolgert A, et al. Forecasting life expectancy, years of life lost, and all-cause and cause-specific mortality for 250 causes of death: reference and alternative scenarios for 2016–40 for 195 countries and territories. *The Lancet* 2018 doi: [https://doi.org/10.1016/S0140-6736\(18\)31694-5](https://doi.org/10.1016/S0140-6736(18)31694-5)
2. World Population Ageing: United Nations, Department of Economic and Social Affairs, Population Division, 2015.
3. Etkind SN, Bone AE, Gomes B, et al. How many people will need palliative care in 2040? Past trends, future projections and implications for services. *BMC Medicine* 2017;15(1):1-10. doi: 10.1186/s12916-017-0860-2
4. May P, Johnston B, Normand C, et al. Population-based palliative care planning in Ireland: how many people will live and die with serious illness to 2046? [version 2; peer review: 2 approved]. *HRB Open Research* 2020;2(35) doi: 10.12688/hrbopenres.12975.2
5. Academy of Medical Sciences. Multimorbidity: a priority for global health research, 2018.
6. Banerjee S. Multimorbidity—older adults need health care that can count past one. *The Lancet* 2015;385(9968):587-89. doi: 10.1016/S0140-6736(14)61596-8
7. Barnett K, Mercer SW, Norbury M, et al. Epidemiology of multimorbidity and implications for health care, research, and medical education: a cross-sectional study. *The Lancet* 2012;380(9836):37-43. doi: 10.1016/S0140-6736(12)60240-2
8. Guthrie B, Payne K, Alderson P, et al. Adapting clinical guidelines to take account of multimorbidity. *BMJ* 2012;345(7878):22-24.
9. National Records of Scotland. Vital Events Reference Tables 2017. Available from <https://www.nrscotland.gov.uk/statistics-and-data/statistics/statistics-by-theme/vital-events/deaths>. Accessed on 15/8/2018, 2018.
10. National Records of Scotland. Projected Population of Scotland (2016-based) 2016 [Available from: <https://www.nrscotland.gov.uk/statistics-and-data/statistics/statistics-by->

[theme/population/population-projections/population-projections-scotland/2016-based/list-of-tables.](#)

11. Gómez-Batiste CX, Martínez-Muñoz CM, Blay CC, et al. Identifying needs and improving palliative care of chronically ill patients: a community-oriented, population-based, public-health approach. *Current Opinion in Supportive and Palliative Care* 2012;6(3):371-78. doi: 10.1097/SPC.0b013e328356aaed
12. Rosenwax L, McNamara B, Blackmore A, et al. Estimating the size of a potential palliative care population. *Palliative Medicine* 2005;19(7):556-62. doi: 10.1191/0269216305pm1067oa
13. Murtagh FEM, Verne J, Bausewein C, et al. How many people need palliative care? A study developing and comparing methods for population-based estimates. 2014 doi: <https://doi.org/10.1177/0269216313489367>
14. Higginson IJ, Evans CJ, Grande G, et al. Evaluating complex interventions in End of Life Care: the MORECare Statement on good practice generated by a synthesis of transparent expert consultations and systematic reviews. *BMC Medicine* 2013;11(1):111. doi: 10.1186/1741-7015-11-111
15. Jones J, Hunter DL. Consensus methods for medical and health services research.(Qualitative Research, part 6). *British Medical Journal* 1995;311(7001):376. doi: 10.1136/bmj.311.7001.376
16. Central Statistics Office (Ireland). Current Population and Labour Force Projections (2016 Based) 2018 [Available from: [https://statbank.cso.ie/px/pxeirestat/Database/eirestat/Current%20Population%20and%20Labour%20Force%20Projections%20\(2016%20Based\)/Current%20Population%20and%20Labour%20Force%20Projections%20\(2016%20Based\)\\_statbank.asp?SP=Current%20Population%20and%20Labour%20Force%20Projections%20\(2016%20Based\)&Planguage=0](https://statbank.cso.ie/px/pxeirestat/Database/eirestat/Current%20Population%20and%20Labour%20Force%20Projections%20(2016%20Based)/Current%20Population%20and%20Labour%20Force%20Projections%20(2016%20Based)_statbank.asp?SP=Current%20Population%20and%20Labour%20Force%20Projections%20(2016%20Based)&Planguage=0)

- 1  
2  
3 17. Stirland LE, González-Saavedra L, Mullin DS, et al. Measuring multimorbidity beyond counting  
4  
5 diseases: systematic review of community and population studies and guide to index choice.  
6  
7 *BMJ* 2020;368:m160. doi: 10.1136/bmj.m160  
8  
9
- 10 18. National Records of Scotland. The Impact of the implementation of IRIS software for ICD-10  
11  
12 cause of death coding on mortality statistics in Scotland 2020 [Available from:  
13  
14 [https://www.nrscotland.gov.uk/files//statistics/vital-events/impact-of-implementation-iris-  
17  
18 for-icd.pdf](https://www.nrscotland.gov.uk/files//statistics/vital-events/impact-of-implementation-iris-<br/>15<br/>16 for-icd.pdf) accessed 26th May 2020.  
19
- 20 19. National Records of Scotland. Deaths involving coronavirus (COVID-19) in Scotland: Week 20  
21  
22 11th May to 20th May 2020 [Available from:  
23  
24 <https://www.nrscotland.gov.uk/files//statistics/covid19/covid-deaths-report-week-20.pdf>.  
25
- 26 20. Canizares M, Hogg-Johnson S, Gignac MAM, et al. Increasing Trajectories of Multimorbidity Over  
27  
28 Time: Birth Cohort Differences and the Role of Changes in Obesity and Income. *The Journals*  
29  
30 *of Gerontology: Series B* 2017;73(7):1303-14. doi: 10.1093/geronb/gbx004  
31
- 32 21. WHO. Multimorbidity: Technical Series on Safer Primary Care. Geneva: World Health  
33  
34 Organisation 2016. Licence: CC BY-NC-SA 3.0 IGO, 2016.  
35
- 36 22. Allsop MJ, Ziegler LE, Mulvey MR, et al. Duration and determinants of hospice-based specialist  
37  
38 palliative care: A national retrospective cohort study. *Palliative Medicine* 2018;32(8):1322-  
39  
40 33. doi: 10.1177/0269216318781417  
41  
42
- 43 23. Bone AE, Gomes B, Etkind SN, et al. What is the impact of population ageing on the future  
44  
45 provision of end-of-life care? Population-based projections of place of death. *Palliative*  
46  
47 *Medicine* 2018;32(2):329-36. doi: 10.1177/0269216317734435  
48  
49
- 50 24. Finucane AM, Bone A, Evans CJ, et al. The impact of population ageing on end-of-life care in  
51  
52 Scotland: Population-based projections of place of death and recommendations for future  
53  
54 service provision. *BMC Palliative Care* 2019 doi: <https://doi.org/10.1186/s12904-019-0490-x>  
55  
56  
57  
58  
59  
60

- 1  
2  
3 25. Finucane AM, Stevenson B, Murray SA. Gradual physical decline characterises the illness  
4 trajectories of care home residents. *International Journal of Palliative Nursing*  
5 2017;23(9):457-61. doi: 10.12968/ijpn.2017.23.9.457  
6  
7  
8  
9  
10 26. Gordon AL, Franklin M, Bradshaw L, et al. Health status of UK care home residents: a cohort  
11 study. *Age and Ageing* 2014;43(1):97-103. doi: 10.1093/ageing/aft077  
12  
13  
14 27. Information Services Division Scotland. Care Home Census for Adults in Scotland: Figures for  
15 2007-2017, 2018.  
16  
17  
18  
19 28. Finucane AM, Davydaitis D, Horseman Z, et al. Electronic care coordination systems for people  
20 with advanced progressive illness: a mixed-methods evaluation in Scottish primary care. *The*  
21 *British journal of general practice : the journal of the Royal College of General Practitioners*  
22 2019;70(690) doi: 10.3399/bjgp19X707117  
23  
24  
25  
26  
27  
28 29. Coordinate My Care 2020 [Available from: <https://www.coordinatemycare.co.uk/>].  
29  
30 30. Scottish Care. Trees that bend in the wind: Exploring the Experiences of Front Line Support  
31 Workers Delivering Palliative and End of Life Care 2017 [Available from:  
32 <http://www.scottishcare.org/wp-content/uploads/2017/02/PEOLC-Report-final-.pdf>.  
33  
34  
35  
36  
37 31. Magee C, Koffman J. Out-of-hours palliative care: what are the educational needs and  
38 preferences of general practitioners? *BMJ Supportive & Palliative Care* 2016;6(3):362-68.  
39 doi: 10.1136/bmjspcare-2014-000764  
40  
41  
42  
43 32. Anstey S, Powell T, Coles B, et al. Education and training to enhance end-of-life care for nursing  
44 home staff: a systematic literature review. *BMJ Supportive & Palliative Care* 2016;6(3):353-  
45 61. doi: 10.1136/bmjspcare-2015-000956  
46  
47  
48  
49  
50 33. Oliver D. Manifesto for multimorbidity. *BMJ* 2018;360 (K1044)  
51  
52  
53  
54  
55  
56  
57  
58  
59  
60

## Figures

Figure 1: Projected estimates of the number of people dying in Scotland with palliative care needs by age up to 2040 using method 2B

Figure 2: Projected underlying cause of death associated with palliative care need by disease group up to 2040 using method 2B

Figure 3: Projected number and percentage of people in Scotland dying from multimorbidity associated with palliative care need, 2017 to 2040

Figure 4: Projected number of people in Scotland dying from multimorbidity associated with palliative care need by age, 2017 to 2040



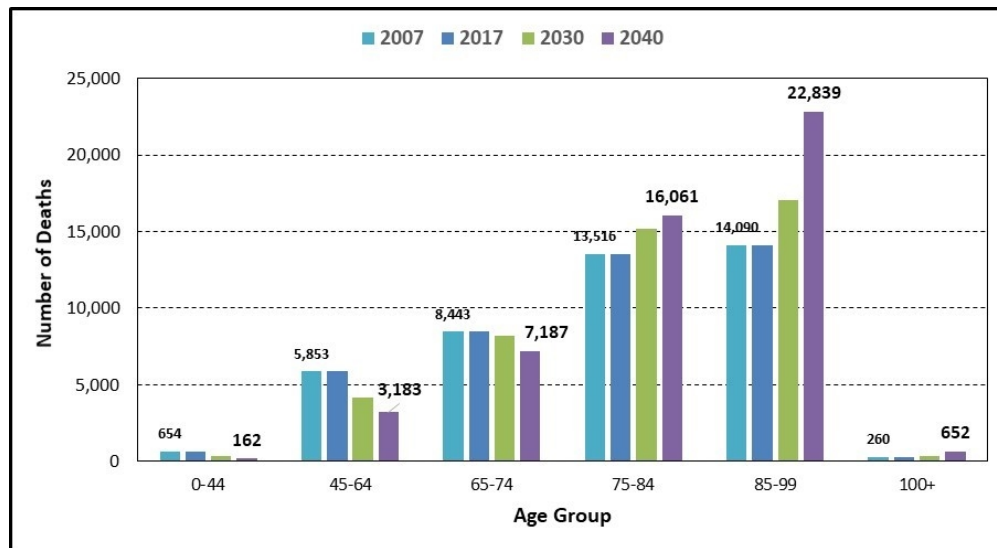

Figure 1: Projected estimates of the number of people dying in Scotland with palliative care needs by age up to 2040 using method 2B

191x104mm (120 x 120 DPI)

1  
2  
3  
4  
5  
6  
7  
8  
9  
10  
11  
12  
13  
14  
15  
16  
17  
18  
19  
20  
21  
22  
23  
24  
25  
26  
27  
28  
29  
30  
31  
32  
33  
34  
35  
36  
37  
38  
39  
40  
41  
42  
43  
44  
45  
46  
47  
48  
49  
50  
51  
52  
53  
54  
55  
56  
57  
58  
59  
60

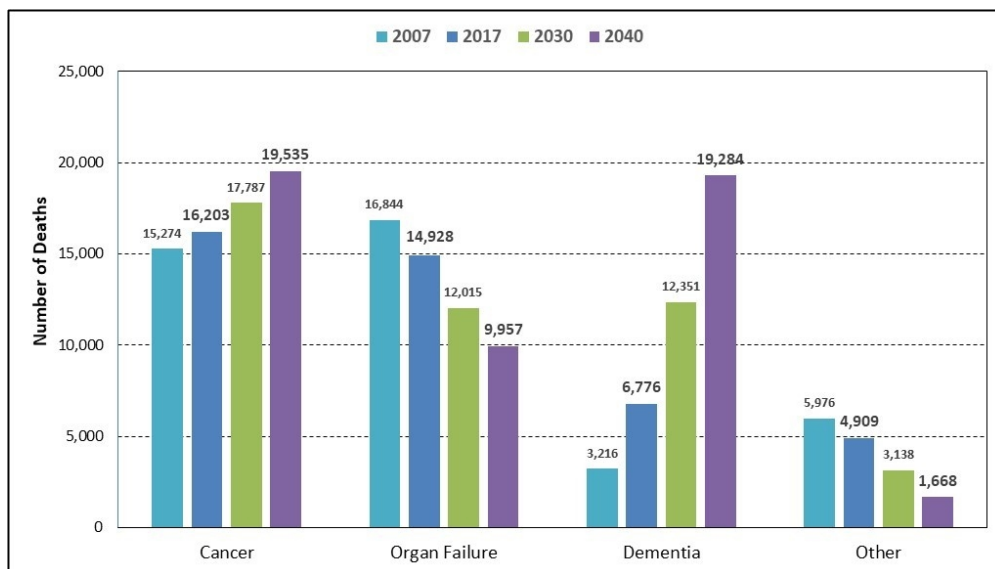

Figure 2: Projected underlying cause of death associated with palliative care need by disease group up to 2040 using method 2B

216x122mm (120 x 120 DPI)

1  
2  
3  
4  
5  
6  
7  
8  
9  
10  
11  
12  
13  
14  
15  
16  
17  
18  
19  
20  
21  
22  
23  
24  
25  
26  
27  
28  
29  
30  
31  
32  
33  
34  
35  
36  
37  
38  
39  
40  
41  
42  
43  
44  
45  
46  
47  
48  
49  
50  
51  
52  
53  
54  
55  
56  
57  
58  
59  
60

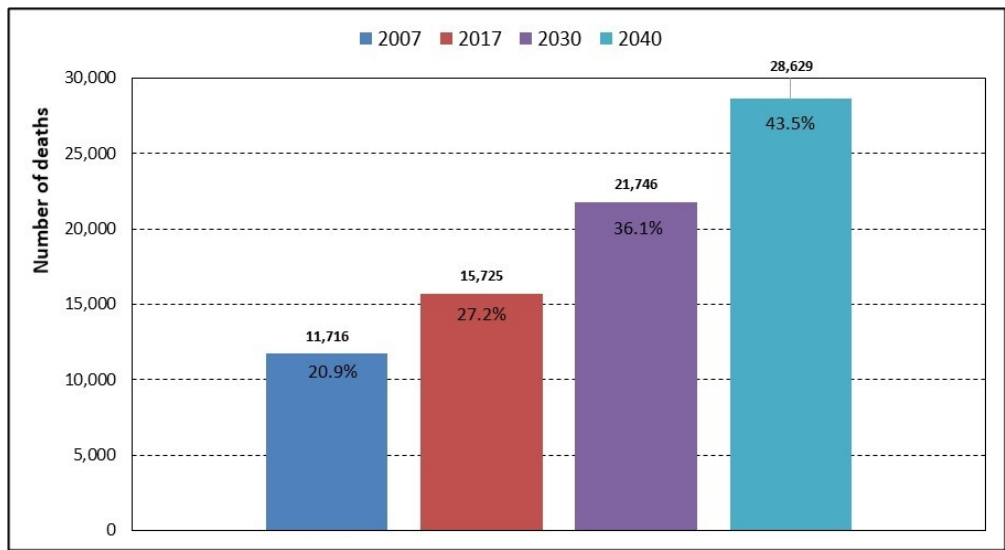

Figure 3: Projected number and percentage of people in Scotland dying from multimorbidity associated with palliative care need, 2017 to 2040

191x104mm (120 x 120 DPI)

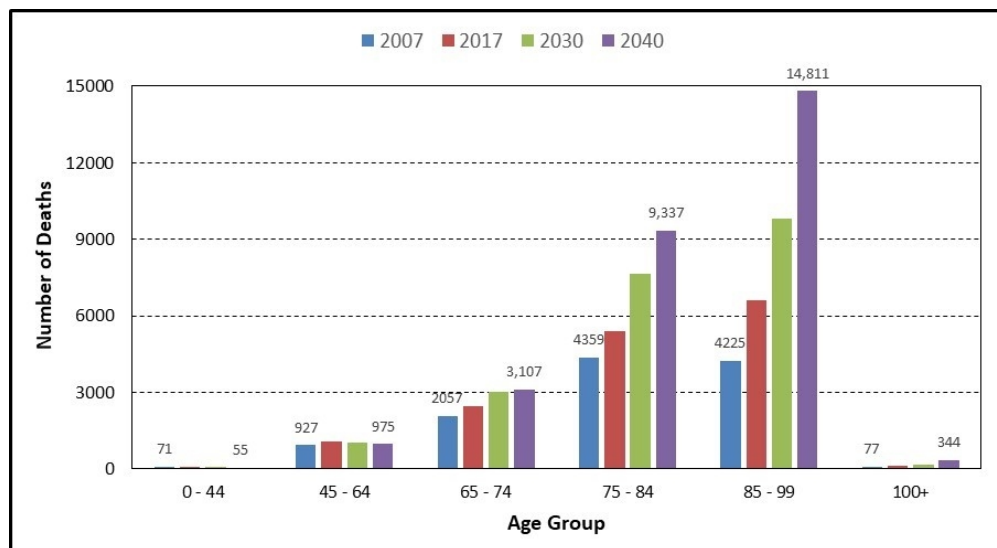

Figure 4: Projected number of people in Scotland dying from multimorbidity associated with palliative care need by age, 2017 to 2040

191x104mm (120 x 120 DPI)

1  
2  
3  
4  
5  
6  
7  
8  
9  
10  
11  
12  
13  
14  
15  
16  
17  
18  
19  
20  
21  
22  
23  
24  
25  
26  
27  
28  
29  
30  
31  
32  
33  
34  
35  
36  
37  
38  
39  
40  
41  
42  
43  
44  
45  
46  
47  
48  
49  
50  
51  
52  
53  
54  
55  
56  
57  
58  
59  
60

## Supplementary File 1

**Page 2:**

International Classification of Disease-10 codes used to estimate palliative care need

**Page 3:**

Role of participants in the expert consultation

**Page 4 - 8:**

Strength of agreement with survey items

**Page 4 - 8:**

STROBE Statement

For peer review only

### International Classification of Disease-10 codes used to estimate palliative care need

| Disease Group | ICD10 Code                                                                        | Conditions included                                                                                                                                                                                   |
|---------------|-----------------------------------------------------------------------------------|-------------------------------------------------------------------------------------------------------------------------------------------------------------------------------------------------------|
| Cancer        | C00 – C97                                                                         | All deaths from malignant neoplasms.                                                                                                                                                                  |
| Organ Failure | I00 – I52 (excl. I12 & I13)<br>J40-47, J96<br>I12, I13, N17, N18, N28<br>K70 - 77 | Heart disease and heart failure.<br>Chronic lower respiratory disease, respiratory failure.<br>Reno-vascular disease, renal failure.<br>Liver disease.                                                |
| Dementia      | F01, F03, G30, R54                                                                | Dementia, vascular dementia, Alzheimer's disease, senility.                                                                                                                                           |
| Other         | G10, G12.2, G20, G23.1, G35, G90.3<br>I60 – I69<br>B20-24                         | Huntington's disease, motor neurone disease, Parkinson's disease, progressive supranuclear palsy, multiple sclerosis, multi-system atrophy.<br>Haemorrhagic, ischaemic and unspecified stroke.<br>HIV |

**Source:** Murtagh FEM, Verne J, Bausewein C, et al. How many people need palliative care? 2014.

DOI: <https://doi.org/10.1177/0269216313489367>.

## Role of participants in the expert consultation

| Area/role                                                                                                 | Number of participants |
|-----------------------------------------------------------------------------------------------------------|------------------------|
| Service manager (3 x NHS; 2 x Hospices)                                                                   | 5                      |
| Policy (Government x 1, Specialist palliative care x 2; palliative care x 1; independent care sector x 1) | 4                      |
| Data analyst (Government)                                                                                 | 4                      |
| GP                                                                                                        | 4                      |
| Researcher (University x 2; charity x 2)                                                                  | 4                      |
| Palliative care specialist (doctor x 2; nurse x 2)                                                        | 4                      |
| Quality Improvement Facilitator (NHS)                                                                     | 2                      |
| Hospice manager                                                                                           | 2                      |
| PPI                                                                                                       | 1                      |
| Project manager (Advocacy organisation)                                                                   | 1                      |
| Volunteer (Hospice)                                                                                       | 1                      |
| Administrator                                                                                             | 1                      |
| Chief Executive (advocacy organisation)                                                                   | 1                      |
| <b>Grand Total</b>                                                                                        | <b>34</b>              |

## Strength of agreement with survey items

| Area                    | Recommended actions                                                                                                                                                     | Agreement rating 1 (strongly disagree) to 9 (strongly agree) |     |        |     |     |     | Action indicated, equivocal or not indicated | Consensus / Strength of agreement |
|-------------------------|-------------------------------------------------------------------------------------------------------------------------------------------------------------------------|--------------------------------------------------------------|-----|--------|-----|-----|-----|----------------------------------------------|-----------------------------------|
|                         |                                                                                                                                                                         | Mean                                                         | SD  | Median | IQR | Min | Max |                                              |                                   |
| Digital technology      | Invest in the national digital platform so it is fully resourced and can be used by all                                                                                 | 8.5                                                          | 0.7 | 9      | 1   | 7   | 9   | Indicated                                    | Close agreement                   |
|                         | Ensure that integrated electronic care records are accessible to all health and social care professionals involved in the care of the person, and the person themselves | 8.5                                                          | 0.9 | 9      | 1   | 6   | 9   | Indicated                                    | Close agreement                   |
|                         | Adopt digital technology such as videoconferencing and telemedicine to facilitate access to support for people with palliative care needs and their carers at home      | 7.6                                                          | 1.5 | 8      | 3   | 4   | 9   | Indicated                                    | Broad agreement                   |
| Person centred approach | Prioritise the patient/carer perspective, value the views of the person receiving care and use this information to provide services tailored to their needs.            | 8.5                                                          | 1.0 | 9      | 1   | 5   | 9   | Indicated                                    | Close agreement                   |
|                         | Encourage systems that promote person centred rather than task-oriented care                                                                                            | 8.3                                                          | 1.1 | 9      | 1   | 5   | 9   | Indicated                                    | Close agreement                   |
|                         | Personalise settings that aren't home (hospices, care home, hospital)                                                                                                   | 7.8                                                          | 1.3 | 8      | 2   | 5   | 9   | Indicated                                    | Close agreement                   |



|                                               |                                                                                                                                                                                                                |     |     |     |   |   |   |           |                 |
|-----------------------------------------------|----------------------------------------------------------------------------------------------------------------------------------------------------------------------------------------------------------------|-----|-----|-----|---|---|---|-----------|-----------------|
| <b>Specialist/generalist palliative care</b>  | Increase capacity and enhance community specialist palliative care services to support primary care                                                                                                            | 7.8 | 1.1 | 8   | 2 | 6 | 9 | Indicated | Close agreement |
|                                               | Prioritise models that improve communication between specialist and non-specialist services to improve the patient journey                                                                                     | 7.7 | 1.4 | 8   | 2 | 5 | 9 | Indicated | Close agreement |
|                                               | Build specialist palliative care capacity to provide education and support to generalists.                                                                                                                     | 7.3 | 1.2 | 7.5 | 2 | 5 | 9 | Indicated | Close agreement |
| <b>Informal carer &amp; community support</b> | Create opportunities to facilitate and improve conversations around death and dying both in clinical practice and in society in general.                                                                       | 8.0 | 1.2 | 8.5 | 2 | 5 | 9 | Indicated | Close agreement |
|                                               | Support communities to start compassionate community initiatives with a focus on improving people's experiences of deteriorating health, death, dying and bereavement, by providing advice on ways to do this. | 7.9 | 1.2 | 8   | 2 | 5 | 9 | Indicated | Close agreement |
|                                               | Build community capacity for informal care; not just formal volunteers, but also "active, engaged citizens"                                                                                                    | 7.9 | 1.2 | 8   | 2 | 5 | 9 | Indicated | Close agreement |
| <b>Research, data &amp; evidence</b>          | Collect and collate care data to increase understanding of unmet needs in order to inform service design and workforce planning                                                                                | 7.9 | 1.0 | 8   | 2 | 5 | 9 | Indicated | Close agreement |
|                                               | Access and use evidence to improve our understanding of people's needs                                                                                                                                         | 7.8 | 1.1 | 8   | 2 | 5 | 9 | Indicated | Close agreement |

|                                     |                                                                                                                                                 |     |     |     |   |   |   |           |                 |
|-------------------------------------|-------------------------------------------------------------------------------------------------------------------------------------------------|-----|-----|-----|---|---|---|-----------|-----------------|
|                                     | and outcomes in palliative care and inform service planning.                                                                                    |     |     |     |   |   |   |           |                 |
| <b>Workforce</b>                    | Better integrate workforce planning and investment to meet projected increases in future palliative care need                                   | 8.0 | 1.4 | 8.5 | 2 | 4 | 9 | Indicated | Close agreement |
|                                     | Increase investment in the community-based workforce including GPs, community nurses, social care staff and nurse specialists                   | 7.9 | 1.5 | 8.5 | 2 | 4 | 9 | Indicated | Close agreement |
|                                     | Prioritise investment in recruitment, retention, education and training for social care staff                                                   | 7.7 | 1.5 | 8   | 2 | 4 | 9 | Indicated | Close agreement |
|                                     | Promote approaches that make both health and social care professionals feel part of the same team.                                              | 7.5 | 1.5 | 8   | 3 | 4 | 9 | Indicated | Broad agreement |
| <b>Governance and commissioning</b> | Encourage Scottish Government to invest in palliative care and to re-establish palliative care policy framework and recommendations             | 8.1 | 1.4 | 9   | 1 | 5 | 9 | Indicated | Close agreement |
|                                     | Conduct evidence based strategic planning to facilitate decision-making regarding models of care and resource use                               | 7.5 | 1.4 | 8   | 3 | 4 | 9 | Indicated | Broad agreement |
|                                     | Increase accountability for embedding existing evidence based good practice                                                                     | 6.9 | 1.5 | 7   | 2 | 4 | 9 | Indicated | Broad agreement |
| <b>Models or approaches to care</b> | Realign palliative care in the health service system. Move away from focus on disease specific and episodic care to management of complex needs | 7.5 | 1.3 | 8   | 2 | 5 | 9 | Indicated | Close agreement |

|                                     |                                                                                                                                                                 |     |     |     |   |   |   |           |                 |
|-------------------------------------|-----------------------------------------------------------------------------------------------------------------------------------------------------------------|-----|-----|-----|---|---|---|-----------|-----------------|
|                                     | Improve efficiency and flexibility of bed use in community settings (e.g. respite admissions to NHS complex care units or care homes) to benefit more people    | 7.5 | 1.4 | 8   | 2 | 4 | 9 | Indicated | Close agreement |
|                                     | Improve coordination and greater use of multi-disciplinary teams for people with dementia                                                                       | 7.4 | 1.5 | 7.5 | 2 | 4 | 9 | Indicated | Close agreement |
|                                     | Reform commissioning processes in social care to enable compassion-led, relationship-centred, time flexible care.                                               | 7.4 | 1.4 | 7   | 3 | 5 | 9 | Indicated | Broad agreement |
|                                     | Promote use of formal tools and approaches to improve early identification for a palliative care approach                                                       | 7.3 | 1.4 | 7   | 3 | 5 | 9 | Indicated | Broad agreement |
| <b>Staff training and wellbeing</b> | Train care home and social care staff in the principles of palliative care to increase their confidence in identifying and caring for people at the end of life | 8.1 | 0.9 | 8   | 2 | 6 | 9 | Indicated | Close agreement |
|                                     | Promote and encourage self-compassion, self-reliance and empathy amongst staff                                                                                  | 7.3 | 1.8 | 8   | 3 | 4 | 9 | Indicated | Broad agreement |
|                                     | Invest in palliative care training for generalists in all settings                                                                                              | 7.6 | 1.5 | 8   | 3 | 5 | 9 | Indicated | Broad agreement |
|                                     | Increase social care staff training to recognise and respond to clients' psychological needs                                                                    | 7.2 | 1.5 | 7   | 3 | 5 | 9 | Indicated | Broad agreement |
|                                     | Prioritise education and training in communication and listening skills                                                                                         | 7.2 | 1.7 | 7   | 3 | 3 | 9 | Indicated | Broad agreement |

|  |                                                                                                    |     |     |     |   |   |   |           |                 |
|--|----------------------------------------------------------------------------------------------------|-----|-----|-----|---|---|---|-----------|-----------------|
|  | Organisations providing care should invest in compassionate and supportive systems for their staff | 7.3 | 1.4 | 7   | 3 | 5 | 9 | Indicated | Broad agreement |
|  | Provide education and training for leaders including compassionate care.                           | 6.5 | 1.6 | 6.5 | 2 | 3 | 9 | Equivocal | Broad agreement |

For peer review only

## STROBE Statement

|                              | Item No | Recommendation                                                                                                                                                                       | Page No                                                           |
|------------------------------|---------|--------------------------------------------------------------------------------------------------------------------------------------------------------------------------------------|-------------------------------------------------------------------|
| <b>Title and abstract</b>    | 1       | (a) Indicate the study's design with a commonly used term in the title or the abstract                                                                                               | P4                                                                |
|                              |         | (b) Provide in the abstract an informative and balanced summary of what was done and what was found                                                                                  | P4-5                                                              |
| <b>Introduction</b>          |         |                                                                                                                                                                                      |                                                                   |
| Background/rationale         | 2       | Explain the scientific background and rationale for the investigation being reported                                                                                                 | P7-8                                                              |
| Objectives                   | 3       | State specific objectives, including any prespecified hypotheses                                                                                                                     | P8                                                                |
| <b>Methods</b>               |         |                                                                                                                                                                                      |                                                                   |
| Study design                 | 4       | Present key elements of study design early in the paper                                                                                                                              | P8                                                                |
| Setting                      | 5       | Describe the setting, locations, and relevant dates, including periods of recruitment, exposure, follow-up, and data collection                                                      | P9 & P12                                                          |
| Participants                 | 6       | (a) Give the eligibility criteria, and the sources and methods of selection of participants. Describe methods of follow-up                                                           | P9                                                                |
|                              |         | (b) For matched studies, give matching criteria and number of exposed and unexposed                                                                                                  | NA                                                                |
| Variables                    | 7       | Clearly define all outcomes, exposures, predictors, potential confounders, and effect modifiers. Give diagnostic criteria, if applicable                                             | P10-12                                                            |
| Data sources/<br>measurement | 8*      | For each variable of interest, give sources of data and details of methods of assessment (measurement). Describe comparability of assessment methods if there is more than one group | P9 Datasources, and Supplementary file 2                          |
| Bias                         | 9       | Describe any efforts to address potential sources of bias                                                                                                                            | Use of a range of methods to estimate future palliative care need |
| Study size                   | 10      | Explain how the study size was arrived at                                                                                                                                            | National dataset – P9                                             |
| Quantitative variables       | 11      | Explain how quantitative variables were handled in the analyses. If applicable, describe which groupings were chosen and why                                                         | NA                                                                |
| Statistical methods          | 12      | (a) Describe all statistical methods, including those used to control for confounding                                                                                                | P10-11                                                            |

|                  |     |                                                                                                                                                                                                   |                                                                                                         |
|------------------|-----|---------------------------------------------------------------------------------------------------------------------------------------------------------------------------------------------------|---------------------------------------------------------------------------------------------------------|
|                  |     | (b) Describe any methods used to examine subgroups and interactions                                                                                                                               | NA                                                                                                      |
|                  |     | (c) Explain how missing data were addressed                                                                                                                                                       | NA                                                                                                      |
|                  |     | (d) If applicable, explain how loss to follow-up was addressed                                                                                                                                    | NA                                                                                                      |
|                  |     | (e) Describe any sensitivity analyses                                                                                                                                                             | Alternative models described                                                                            |
| <b>Results</b>   |     |                                                                                                                                                                                                   |                                                                                                         |
| Participants     | 13* | (a) Report numbers of individuals at each stage of study—eg numbers potentially eligible, examined for eligibility, confirmed eligible, included in the study, completing follow-up, and analysed | NA for quantitative analysis; P18 for and supplementary file 1 for participation in expert consultation |
|                  |     | (b) Give reasons for non-participation at each stage                                                                                                                                              | NA for quantitative analysis' not known for expert consultation/survey.                                 |
|                  |     | (c) Consider use of a flow diagram                                                                                                                                                                | NA                                                                                                      |
| Descriptive data | 14* | (a) Give characteristics of study participants (eg demographic, clinical, social) and information on exposures and potential confounders                                                          | For expert consultation see supplementary material 1                                                    |
|                  |     | (b) Indicate number of participants with missing data for each variable of interest                                                                                                               | NA                                                                                                      |
|                  |     | (c) Summarise follow-up time (eg, average and total amount)                                                                                                                                       | NA                                                                                                      |
| Outcome data     | 15* | Report numbers of outcome events or summary measures over time                                                                                                                                    | Estimates of palliative care need over time shown in results.                                           |

**Data Sources (blue tabs)**

[All Deaths - extracted from the NRS deaths database held by PHS](#)

[PC Deaths \(Underlying Cause\) - extracted from the NRS deaths database held by PHS, based on 'underly](#)

[PC Deaths \(All Causes\) - extracted from the NRS deaths database held by PHS, based on both 'underlyin](#)

[ONS Mortality Projections - published by the ONS](#)

**Projection Methods (orange tabs)**

[Method 1](#)

[Method 2A](#)

[Method 2B](#)

[Method 3](#)

**Projections by Condition Using Method 2B (green tabs)**

[Cancer](#)

[Organ Failure](#)

[Dementia](#)

[Other PC Deaths](#)

**Projection of Multimorbidity Using Method 3 (red tab)**

[Multimorbidity](#)

**Acronyms**

NRS National Records of Scotland

ONS Office for National Statistics

PC Palliative care

PHS Public Health Scotland

1  
2  
3  
4  
5 ring cause of death' only  
6 g cause of death' and 'contributory causes of death'  
7  
8  
9  
10  
11  
12  
13  
14  
15  
16  
17  
18  
19  
20  
21  
22  
23  
24  
25  
26  
27  
28  
29  
30  
31  
32  
33  
34  
35  
36  
37  
38  
39  
40  
41  
42  
43  
44  
45  
46  
47  
48  
49  
50  
51  
52  
53  
54  
55  
56  
57  
58  
59  
60

For peer review only



|    | <b>Gender</b> | <b>Age Group</b> | <b>2007</b> | <b>2008</b> | <b>2009</b> | <b>2010</b> | <b>2011</b> | <b>2012</b> | <b>2013</b> |
|----|---------------|------------------|-------------|-------------|-------------|-------------|-------------|-------------|-------------|
| 1  |               |                  |             |             |             |             |             |             |             |
| 2  |               |                  |             |             |             |             |             |             |             |
| 3  | Female        | 0 - 4            | 144         | 130         | 113         | 118         | 117         | 101         | 107         |
| 4  | Female        | 5 - 9            | 11          | 11          | 11          | 6           | 10          | 13          | 5           |
| 5  | Female        | 10 - 14          | 14          | 18          | 19          | 13          | 12          | 7           | 11          |
| 6  | Female        | 15 - 19          | 50          | 55          | 47          | 52          | 43          | 30          | 44          |
| 7  | Female        | 20 - 24          | 52          | 68          | 64          | 59          | 52          | 55          | 38          |
| 8  | Female        | 25 - 29          | 62          | 70          | 75          | 70          | 89          | 87          | 60          |
| 9  | Female        | 30 - 34          | 104         | 102         | 109         | 121         | 104         | 99          | 113         |
| 10 | Female        | 35 - 39          | 197         | 194         | 181         | 165         | 188         | 141         | 152         |
| 11 | Female        | 40 - 44          | 293         | 303         | 327         | 287         | 269         | 292         | 246         |
| 12 | Female        | 45 - 49          | 483         | 449         | 448         | 427         | 470         | 419         | 422         |
| 13 | Female        | 50 - 54          | 641         | 634         | 663         | 640         | 691         | 660         | 658         |
| 14 | Female        | 55 - 59          | 918         | 930         | 863         | 846         | 860         | 851         | 884         |
| 15 | Female        | 60 - 64          | 1393        | 1385        | 1388        | 1426        | 1359        | 1298        | 1242        |
| 16 | Female        | 65 - 69          | 1980        | 1851        | 1785        | 1824        | 1767        | 1836        | 1871        |
| 17 | Female        | 70 - 74          | 2752        | 2709        | 2610        | 2621        | 2501        | 2619        | 2585        |
| 18 | Female        | 75 - 79          | 3877        | 4111        | 3766        | 3684        | 3623        | 3753        | 3671        |
| 19 | Female        | 80 - 84          | 5206        | 5188        | 4859        | 4923        | 4735        | 5081        | 4844        |
| 20 | Female        | 85 - 89          | 5347        | 5557        | 5506        | 5220        | 5248        | 5422        | 5341        |
| 21 | Female        | 90 - 94          | 3714        | 3584        | 3385        | 3591        | 3730        | 4177        | 4203        |
| 22 | Female        | 95 - 99          | 1552        | 1579        | 1498        | 1600        | 1569        | 1649        | 1531        |
| 23 | Female        | 100+             | 301         | 268         | 311         | 311         | 311         | 332         | 347         |
| 24 |               |                  |             |             |             |             |             |             |             |
| 25 |               |                  |             |             |             |             |             |             |             |
| 26 | Male          | 0 - 4            | 177         | 162         | 161         | 142         | 158         | 153         | 119         |
| 27 | Male          | 5 - 9            | 13          | 19          | 14          | 18          | 17          | 19          | 9           |
| 28 | Male          | 10 - 14          | 31          | 16          | 13          | 11          | 14          | 17          | 18          |
| 29 | Male          | 15 - 19          | 127         | 106         | 105         | 95          | 78          | 61          | 71          |
| 30 | Male          | 20 - 24          | 207         | 174         | 149         | 151         | 153         | 107         | 112         |
| 31 | Male          | 25 - 29          | 188         | 224         | 221         | 196         | 188         | 194         | 155         |
| 32 | Male          | 30 - 34          | 273         | 279         | 227         | 234         | 251         | 257         | 227         |
| 33 | Male          | 35 - 39          | 371         | 376         | 336         | 318         | 334         | 312         | 280         |
| 34 | Male          | 40 - 44          | 537         | 492         | 548         | 481         | 513         | 436         | 492         |
| 35 | Male          | 45 - 49          | 674         | 746         | 665         | 669         | 635         | 655         | 666         |
| 36 | Male          | 50 - 54          | 1011        | 969         | 963         | 972         | 850         | 896         | 924         |
| 37 | Male          | 55 - 59          | 1471        | 1418        | 1282        | 1343        | 1256        | 1267        | 1303        |
| 38 | Male          | 60 - 64          | 2101        | 2063        | 2030        | 2045        | 1955        | 1884        | 1764        |
| 39 | Male          | 65 - 69          | 2540        | 2649        | 2538        | 2423        | 2460        | 2508        | 2609        |
| 40 | Male          | 70 - 74          | 3542        | 3403        | 3272        | 3224        | 3291        | 3172        | 3157        |
| 41 | Male          | 75 - 79          | 4238        | 4063        | 3908        | 4012        | 3817        | 3949        | 3940        |
| 42 | Male          | 80 - 84          | 4309        | 4227        | 4153        | 4258        | 4300        | 4168        | 4375        |
| 43 | Male          | 85 - 89          | 3152        | 3230        | 3444        | 3271        | 3513        | 3612        | 3588        |
| 44 | Male          | 90 - 94          | 1505        | 1421        | 1305        | 1579        | 1630        | 1832        | 2025        |
| 45 | Male          | 95 - 99          | 393         | 407         | 441         | 452         | 448         | 459         | 438         |
| 46 | Male          | 100+             | 33          | 60          | 51          | 69          | 52          | 57          | 53          |
| 47 |               |                  |             |             |             |             |             |             |             |
| 48 |               |                  |             |             |             |             |             |             |             |
| 49 |               |                  |             |             |             |             |             |             |             |
| 50 |               |                  |             |             |             |             |             |             |             |
| 51 |               |                  |             |             |             |             |             |             |             |
| 52 |               |                  |             |             |             |             |             |             |             |
| 53 |               |                  |             |             |             |             |             |             |             |
| 54 |               |                  |             |             |             |             |             |             |             |
| 55 |               |                  |             |             |             |             |             |             |             |
| 56 |               |                  |             |             |             |             |             |             |             |
| 57 |               |                  |             |             |             |             |             |             |             |
| 58 |               |                  |             |             |             |             |             |             |             |
| 59 |               |                  |             |             |             |             |             |             |             |
| 60 |               |                  |             |             |             |             |             |             |             |

|    | <b>2014</b> | <b>2015</b> | <b>2016</b> | <b>2017</b> |
|----|-------------|-------------|-------------|-------------|
| 1  |             |             |             |             |
| 2  |             |             |             |             |
| 3  | 105         | 90          | 106         | 84          |
| 4  | 7           | 3           | 10          | 10          |
| 5  | 12          | 7           | 13          | 17          |
| 6  |             |             |             |             |
| 7  | 29          | 24          | 31          | 31          |
| 8  | 57          | 35          | 57          | 44          |
| 9  | 62          | 75          | 70          | 58          |
| 10 | 104         | 120         | 125         | 102         |
| 11 | 129         | 176         | 178         | 207         |
| 12 |             |             |             |             |
| 13 | 273         | 258         | 292         | 264         |
| 14 | 433         | 462         | 452         | 403         |
| 15 | 629         | 677         | 668         | 687         |
| 16 | 910         | 904         | 935         | 952         |
| 17 | 1220        | 1179        | 1275        | 1277        |
| 18 |             |             |             |             |
| 19 | 1851        | 1965        | 1923        | 1887        |
| 20 | 2391        | 2617        | 2573        | 2636        |
| 21 | 3630        | 3666        | 3619        | 3726        |
| 22 | 4828        | 4992        | 4800        | 4894        |
| 23 | 5308        | 5596        | 5505        | 5730        |
| 24 |             |             |             |             |
| 25 | 4160        | 4689        | 4209        | 4422        |
| 26 | 1459        | 1739        | 1764        | 1871        |
| 27 | 353         | 399         | 363         | 323         |
| 28 |             |             |             |             |
| 29 | 127         | 117         | 115         | 118         |
| 30 | 16          | 12          | 19          | 7           |
| 31 | 20          | 12          | 13          | 19          |
| 32 | 52          | 59          | 67          | 53          |
| 33 | 113         | 100         | 108         | 98          |
| 34 | 146         | 159         | 206         | 167         |
| 35 | 176         | 234         | 238         | 259         |
| 36 | 291         | 288         | 292         | 339         |
| 37 | 472         | 448         | 530         | 446         |
| 38 | 659         | 683         | 721         | 735         |
| 39 | 890         | 946         | 1031        | 982         |
| 40 | 1249        | 1329        | 1367        | 1304        |
| 41 | 1750        | 1795        | 1807        | 1799        |
| 42 | 2624        | 2805        | 2844        | 2603        |
| 43 | 3163        | 3404        | 3245        | 3403        |
| 44 | 3924        | 4079        | 3843        | 4128        |
| 45 | 4316        | 4535        | 4547        | 4619        |
| 46 | 3732        | 3946        | 3827        | 4064        |
| 47 | 2049        | 2319        | 2223        | 2334        |
| 48 | 454         | 568         | 624         | 679         |
| 49 | 65          | 62          | 86          | 89          |
| 50 |             |             |             |             |
| 51 |             |             |             |             |
| 52 |             |             |             |             |
| 53 |             |             |             |             |
| 54 |             |             |             |             |
| 55 |             |             |             |             |
| 56 |             |             |             |             |
| 57 |             |             |             |             |
| 58 |             |             |             |             |
| 59 |             |             |             |             |
| 60 |             |             |             |             |

|    | <b>Gender</b> | <b>Age Group</b> | <b>2007</b> | <b>2008</b> | <b>2009</b> | <b>2010</b> | <b>2011</b> | <b>2012</b> | <b>2013</b> |
|----|---------------|------------------|-------------|-------------|-------------|-------------|-------------|-------------|-------------|
| 1  |               |                  |             |             |             |             |             |             |             |
| 2  |               |                  |             |             |             |             |             |             |             |
| 3  | Female        | 0 - 4            | 5           | 3           | 4           | 2           | 7           | 6           | 6           |
| 4  | Female        | 5 - 9            | 4           | 7           | 5           | 2           | 2           | 3           | 1           |
| 5  | Female        | 10 - 14          | 6           | 8           | 4           | 4           | 5           | 1           | 5           |
| 6  | Female        | 15 - 19          | 8           | 11          | 9           | 9           | 11          | 4           | 11          |
| 7  | Female        | 20 - 24          | 15          | 12          | 10          | 11          | 12          | 9           | 8           |
| 8  | Female        | 25 - 29          | 23          | 14          | 21          | 14          | 24          | 27          | 19          |
| 9  | Female        | 30 - 34          | 49          | 39          | 45          | 40          | 39          | 39          | 48          |
| 10 | Female        | 35 - 39          | 103         | 103         | 90          | 85          | 96          | 66          | 84          |
| 11 | Female        | 40 - 44          | 192         | 186         | 200         | 192         | 160         | 180         | 150         |
| 12 | Female        | 45 - 49          | 360         | 311         | 314         | 297         | 330         | 291         | 287         |
| 13 | Female        | 50 - 54          | 490         | 460         | 498         | 482         | 510         | 500         | 502         |
| 14 | Female        | 55 - 59          | 706         | 741         | 690         | 671         | 665         | 691         | 688         |
| 15 | Female        | 60 - 64          | 1147        | 1141        | 1121        | 1133        | 1088        | 1058        | 1037        |
| 16 | Female        | 65 - 69          | 1592        | 1509        | 1455        | 1478        | 1431        | 1529        | 1546        |
| 17 | Female        | 70 - 74          | 2181        | 2180        | 2106        | 2099        | 1995        | 2125        | 2085        |
| 18 | Female        | 75 - 79          | 3014        | 3181        | 2906        | 2845        | 2834        | 2952        | 2878        |
| 19 | Female        | 80 - 84          | 3913        | 3867        | 3639        | 3744        | 3662        | 3897        | 3721        |
| 20 | Female        | 85 - 89          | 3872        | 4061        | 4007        | 3790        | 3837        | 4074        | 4020        |
| 21 | Female        | 90 - 94          | 2575        | 2431        | 2375        | 2475        | 2661        | 2990        | 3023        |
| 22 | Female        | 95 - 99          | 1040        | 1066        | 998         | 1080        | 1093        | 1127        | 1066        |
| 23 | Female        | 100+             | 179         | 170         | 218         | 202         | 209         | 224         | 226         |
| 24 |               |                  |             |             |             |             |             |             |             |
| 25 |               |                  |             |             |             |             |             |             |             |
| 26 |               |                  |             |             |             |             |             |             |             |
| 27 |               |                  |             |             |             |             |             |             |             |
| 28 |               |                  |             |             |             |             |             |             |             |
| 29 | Male          | 0 - 4            | 10          | 5           | 3           | 7           | 5           | 10          | 6           |
| 30 | Male          | 5 - 9            | 1           | 4           | 5           | 6           | 4           | 3           | 3           |
| 31 | Male          | 10 - 14          | 9           | 5           | 2           | 1           | 5           | 4           | 8           |
| 32 | Male          | 15 - 19          | 10          | 10          | 10          | 9           | 10          | 11          | 7           |
| 33 | Male          | 20 - 24          | 23          | 15          | 9           | 15          | 15          | 6           | 8           |
| 34 | Male          | 25 - 29          | 23          | 27          | 21          | 36          | 32          | 18          | 22          |
| 35 | Male          | 30 - 34          | 65          | 40          | 44          | 46          | 52          | 61          | 52          |
| 36 | Male          | 35 - 39          | 127         | 132         | 111         | 109         | 92          | 92          | 77          |
| 37 | Male          | 40 - 44          | 276         | 229         | 251         | 216         | 245         | 182         | 217         |
| 38 | Male          | 45 - 49          | 408         | 472         | 397         | 406         | 363         | 380         | 386         |
| 39 | Male          | 50 - 54          | 743         | 672         | 699         | 707         | 593         | 615         | 648         |
| 40 | Male          | 55 - 59          | 1156        | 1112        | 979         | 1010        | 967         | 967         | 984         |
| 41 | Male          | 60 - 64          | 1665        | 1647        | 1612        | 1619        | 1572        | 1507        | 1392        |
| 42 | Male          | 65 - 69          | 2094        | 2187        | 2059        | 1946        | 1975        | 2058        | 2101        |
| 43 | Male          | 70 - 74          | 2879        | 2763        | 2651        | 2550        | 2675        | 2554        | 2582        |
| 44 | Male          | 75 - 79          | 3378        | 3116        | 3123        | 3201        | 3050        | 3123        | 3120        |
| 45 | Male          | 80 - 84          | 3311        | 3233        | 3152        | 3285        | 3324        | 3203        | 3412        |
| 46 | Male          | 85 - 89          | 2352        | 2382        | 2513        | 2399        | 2600        | 2707        | 2688        |
| 47 | Male          | 90 - 94          | 1044        | 992         | 888         | 1095        | 1160        | 1298        | 1431        |
| 48 | Male          | 95 - 99          | 241         | 256         | 293         | 282         | 292         | 288         | 297         |
| 49 | Male          | 100+             | 21          | 37          | 29          | 31          | 28          | 34          | 33          |
| 50 |               |                  |             |             |             |             |             |             |             |
| 51 |               |                  |             |             |             |             |             |             |             |
| 52 |               |                  |             |             |             |             |             |             |             |
| 53 |               |                  |             |             |             |             |             |             |             |
| 54 |               |                  |             |             |             |             |             |             |             |
| 55 |               |                  |             |             |             |             |             |             |             |
| 56 |               |                  |             |             |             |             |             |             |             |
| 57 |               |                  |             |             |             |             |             |             |             |
| 58 |               |                  |             |             |             |             |             |             |             |
| 59 |               |                  |             |             |             |             |             |             |             |
| 60 |               |                  |             |             |             |             |             |             |             |

|    | <b>2014</b> | <b>2015</b> | <b>2016</b> | <b>2017</b> |
|----|-------------|-------------|-------------|-------------|
| 1  |             |             |             |             |
| 2  |             |             |             |             |
| 3  | 2           | 2           | 2           | 7           |
| 4  | 2           | 1           | 2           | 3           |
| 5  | 5           | 2           | 4           | 6           |
| 6  | 8           | 5           | 7           | 7           |
| 7  | 8           | 9           | 10          | 10          |
| 8  | 14          | 26          | 20          | 14          |
| 9  | 37          | 45          | 42          | 39          |
| 10 | 59          | 79          | 80          | 73          |
| 11 | 169         | 134         | 163         | 131         |
| 12 | 286         | 312         | 268         | 249         |
| 13 | 462         | 482         | 478         | 513         |
| 14 | 719         | 701         | 702         | 720         |
| 15 | 959         | 932         | 986         | 1021        |
| 16 | 1504        | 1576        | 1538        | 1513        |
| 17 | 1945        | 2100        | 2070        | 2119        |
| 18 | 2810        | 2871        | 2843        | 2930        |
| 19 | 3648        | 3771        | 3612        | 3736        |
| 20 | 3945        | 4184        | 4123        | 4316        |
| 21 | 3030        | 3387        | 3037        | 3311        |
| 22 | 1025        | 1210        | 1213        | 1316        |
| 23 | 239         | 241         | 228         | 205         |
| 24 |             |             |             |             |
| 25 | 5           | 3           | 3           | 4           |
| 26 | 6           | 4           | 7           | 3           |
| 27 | 4           | 7           | 3           | 5           |
| 28 | 6           | 9           | 7           | 10          |
| 29 | 10          | 10          | 12          | 7           |
| 30 | 17          | 28          | 36          | 20          |
| 31 | 36          | 59          | 44          | 54          |
| 32 | 91          | 82          | 67          | 98          |
| 33 | 203         | 188         | 191         | 163         |
| 34 | 367         | 371         | 389         | 390         |
| 35 | 603         | 639         | 655         | 602         |
| 36 | 947         | 953         | 1022        | 945         |
| 37 | 1379        | 1435        | 1398        | 1413        |
| 38 | 2131        | 2252        | 2237        | 2085        |
| 39 | 2526        | 2679        | 2582        | 2726        |
| 40 | 3095        | 3187        | 3005        | 3256        |
| 41 | 3306        | 3482        | 3499        | 3594        |
| 42 | 2803        | 2898        | 2841        | 3054        |
| 43 | 1462        | 1654        | 1572        | 1639        |
| 44 | 307         | 354         | 398         | 454         |
| 45 | 41          | 37          | 56          | 55          |
| 46 |             |             |             |             |
| 47 |             |             |             |             |
| 48 |             |             |             |             |
| 49 |             |             |             |             |
| 50 |             |             |             |             |
| 51 |             |             |             |             |
| 52 |             |             |             |             |
| 53 |             |             |             |             |
| 54 |             |             |             |             |
| 55 |             |             |             |             |
| 56 |             |             |             |             |
| 57 |             |             |             |             |
| 58 |             |             |             |             |
| 59 |             |             |             |             |
| 60 |             |             |             |             |

|    | <b>Gender</b> | <b>Age Group</b> | <b>2007</b> | <b>2008</b> | <b>2009</b> | <b>2010</b> | <b>2011</b> | <b>2012</b> | <b>2013</b> |
|----|---------------|------------------|-------------|-------------|-------------|-------------|-------------|-------------|-------------|
| 1  |               |                  |             |             |             |             |             |             |             |
| 2  |               |                  |             |             |             |             |             |             |             |
| 3  | Female        | 0 - 4            | 17          | 10          | 13          | 10          | 11          | 14          | 12          |
| 4  | Female        | 5 - 9            | 6           | 7           | 5           | 4           | 6           | 5           | 2           |
| 5  | Female        | 10 - 14          | 7           | 9           | 7           | 7           | 8           | 2           | 6           |
| 6  | Female        | 15 - 19          | 12          | 16          | 11          | 16          | 15          | 5           | 17          |
| 7  | Female        | 20 - 24          | 20          | 18          | 17          | 16          | 18          | 13          | 11          |
| 8  | Female        | 25 - 29          | 28          | 19          | 29          | 23          | 37          | 33          | 22          |
| 9  | Female        | 30 - 34          | 54          | 52          | 53          | 58          | 46          | 53          | 59          |
| 10 | Female        | 35 - 39          | 125         | 125         | 106         | 102         | 109         | 80          | 96          |
| 11 | Female        | 40 - 44          | 216         | 212         | 230         | 217         | 182         | 216         | 172         |
| 12 | Female        | 45 - 49          | 412         | 353         | 352         | 339         | 369         | 327         | 332         |
| 13 | Female        | 50 - 54          | 550         | 539         | 565         | 542         | 574         | 562         | 562         |
| 14 | Female        | 55 - 59          | 800         | 831         | 769         | 759         | 754         | 769         | 788         |
| 15 | Female        | 60 - 64          | 1,288       | 1,278       | 1,284       | 1,297       | 1,244       | 1,180       | 1,145       |
| 16 | Female        | 65 - 69          | 1,820       | 1,713       | 1,659       | 1,691       | 1,629       | 1,705       | 1,738       |
| 17 | Female        | 70 - 74          | 2,537       | 2,510       | 2,433       | 2,427       | 2,334       | 2,413       | 2,412       |
| 18 | Female        | 75 - 79          | 3,590       | 3,790       | 3,466       | 3,434       | 3,349       | 3,474       | 3,387       |
| 19 | Female        | 80 - 84          | 4,811       | 4,735       | 4,494       | 4,543       | 4,345       | 4,685       | 4,466       |
| 20 | Female        | 85 - 89          | 4,857       | 5,084       | 5,039       | 4,785       | 4,769       | 4,993       | 4,936       |
| 21 | Female        | 90 - 94          | 3,307       | 3,175       | 3,067       | 3,260       | 3,396       | 3,788       | 3,808       |
| 22 | Female        | 95 - 99          | 1,377       | 1,395       | 1,326       | 1,429       | 1,409       | 1,475       | 1,383       |
| 23 | Female        | 100+             | 247         | 237         | 279         | 274         | 265         | 300         | 313         |
| 24 |               |                  |             |             |             |             |             |             |             |
| 25 |               |                  |             |             |             |             |             |             |             |
| 26 |               |                  |             |             |             |             |             |             |             |
| 27 |               |                  |             |             |             |             |             |             |             |
| 28 |               |                  |             |             |             |             |             |             |             |
| 29 | Male          | 0 - 4            | 19          | 16          | 8           | 13          | 12          | 14          | 14          |
| 30 | Male          | 5 - 9            | 4           | 7           | 7           | 9           | 9           | 5           | 5           |
| 31 | Male          | 10 - 14          | 10          | 6           | 3           | 2           | 9           | 5           | 11          |
| 32 | Male          | 15 - 19          | 17          | 21          | 15          | 15          | 18          | 16          | 12          |
| 33 | Male          | 20 - 24          | 35          | 27          | 20          | 25          | 23          | 12          | 13          |
| 34 | Male          | 25 - 29          | 35          | 37          | 32          | 43          | 44          | 26          | 31          |
| 35 | Male          | 30 - 34          | 82          | 58          | 57          | 61          | 66          | 76          | 71          |
| 36 | Male          | 35 - 39          | 159         | 159         | 133         | 134         | 113         | 127         | 108         |
| 37 | Male          | 40 - 44          | 324         | 267         | 307         | 275         | 296         | 218         | 287         |
| 38 | Male          | 45 - 49          | 464         | 535         | 471         | 463         | 429         | 444         | 450         |
| 39 | Male          | 50 - 54          | 834         | 784         | 786         | 810         | 681         | 704         | 738         |
| 40 | Male          | 55 - 59          | 1,277       | 1,245       | 1,115       | 1,170       | 1,094       | 1,081       | 1,113       |
| 41 | Male          | 60 - 64          | 1,893       | 1,849       | 1,820       | 1,840       | 1,775       | 1,699       | 1,561       |
| 42 | Male          | 65 - 69          | 2,355       | 2,466       | 2,354       | 2,231       | 2,280       | 2,319       | 2,420       |
| 43 | Male          | 70 - 74          | 3,299       | 3,184       | 3,045       | 3,010       | 3,091       | 2,963       | 2,928       |
| 44 | Male          | 75 - 79          | 3,977       | 3,763       | 3,671       | 3,741       | 3,565       | 3,670       | 3,661       |
| 45 | Male          | 80 - 84          | 3,996       | 3,923       | 3,874       | 3,992       | 3,979       | 3,896       | 4,082       |
| 46 | Male          | 85 - 89          | 2,918       | 2,973       | 3,168       | 3,029       | 3,235       | 3,335       | 3,302       |
| 47 | Male          | 90 - 94          | 1,337       | 1,263       | 1,177       | 1,433       | 1,467       | 1,665       | 1,835       |
| 48 | Male          | 95 - 99          | 330         | 342         | 395         | 396         | 394         | 395         | 383         |
| 49 | Male          | 100+             | 30          | 49          | 46          | 59          | 45          | 53          | 47          |
| 50 |               |                  |             |             |             |             |             |             |             |
| 51 |               |                  |             |             |             |             |             |             |             |
| 52 |               |                  |             |             |             |             |             |             |             |
| 53 |               |                  |             |             |             |             |             |             |             |
| 54 |               |                  |             |             |             |             |             |             |             |
| 55 |               |                  |             |             |             |             |             |             |             |
| 56 |               |                  |             |             |             |             |             |             |             |
| 57 |               |                  |             |             |             |             |             |             |             |
| 58 |               |                  |             |             |             |             |             |             |             |
| 59 |               |                  |             |             |             |             |             |             |             |
| 60 |               |                  |             |             |             |             |             |             |             |

|    | <b>2014</b> | <b>2015</b> | <b>2016</b> | <b>2017</b> |
|----|-------------|-------------|-------------|-------------|
| 1  |             |             |             |             |
| 2  |             |             |             |             |
| 3  | 6           | 10          | 11          | 14          |
| 4  | 3           | 1           | 3           | 3           |
| 5  | 5           | 3           | 6           | 8           |
| 6  | 9           | 11          | 8           | 9           |
| 7  |             |             |             |             |
| 8  | 14          | 14          | 19          | 18          |
| 9  | 19          | 31          | 26          | 20          |
| 10 | 43          | 61          | 61          | 53          |
| 11 | 72          | 99          | 97          | 100         |
| 12 |             |             |             |             |
| 13 | 197         | 157         | 202         | 163         |
| 14 | 329         | 357         | 333         | 301         |
| 15 | 537         | 561         | 563         | 585         |
| 16 | 816         | 795         | 816         | 849         |
| 17 | 1,103       | 1,067       | 1,155       | 1,169       |
| 18 | 1,703       | 1,812       | 1,774       | 1,750       |
| 19 | 2,253       | 2,471       | 2,403       | 2,494       |
| 20 | 3,344       | 3,453       | 3,385       | 3,496       |
| 21 | 4,446       | 4,628       | 4,470       | 4,580       |
| 22 | 4,899       | 5,190       | 5,134       | 5,331       |
| 23 | 3,812       | 4,302       | 3,881       | 4,134       |
| 24 | 1,318       | 1,589       | 1,594       | 1,725       |
| 25 | 321         | 345         | 327         | 288         |
| 26 |             |             |             |             |
| 27 |             |             |             |             |
| 28 |             |             |             |             |
| 29 | 10          | 9           | 10          | 9           |
| 30 | 8           | 6           | 9           | 4           |
| 31 | 7           | 8           | 5           | 8           |
| 32 | 9           | 15          | 12          | 13          |
| 33 | 14          | 18          | 21          | 13          |
| 34 | 29          | 37          | 44          | 30          |
| 35 | 52          | 86          | 69          | 78          |
| 36 | 126         | 121         | 125         | 140         |
| 37 | 256         | 238         | 265         | 248         |
| 38 | 449         | 456         | 491         | 497         |
| 39 | 691         | 759         | 814         | 752         |
| 40 | 1,077       | 1,135       | 1,190       | 1,107       |
| 41 | 1,582       | 1,603       | 1,620       | 1,619       |
| 42 | 2,427       | 2,591       | 2,608       | 2,416       |
| 43 | 2,939       | 3,159       | 3,042       | 3,206       |
| 44 | 3,676       | 3,818       | 3,609       | 3,882       |
| 45 | 4,024       | 4,229       | 4,281       | 4,367       |
| 46 | 3,470       | 3,685       | 3,591       | 3,815       |
| 47 | 1,869       | 2,127       | 2,066       | 2,155       |
| 48 | 395         | 499         | 560         | 620         |
| 49 | 55          | 55          | 69          | 79          |
| 50 |             |             |             |             |
| 51 |             |             |             |             |
| 52 |             |             |             |             |
| 53 |             |             |             |             |
| 54 |             |             |             |             |
| 55 |             |             |             |             |
| 56 |             |             |             |             |
| 57 |             |             |             |             |
| 58 |             |             |             |             |
| 59 |             |             |             |             |
| 60 |             |             |             |             |

|    | <b>Gender</b> | <b>Age Group</b> | <b>2018 - 2019</b> | <b>2019 - 2020</b> | <b>2020 - 2021</b> | <b>2021 - 2022</b> | <b>2022 - 2023</b> | <b>2023 - 2024</b> |
|----|---------------|------------------|--------------------|--------------------|--------------------|--------------------|--------------------|--------------------|
| 1  |               |                  |                    |                    |                    |                    |                    |                    |
| 2  |               |                  |                    |                    |                    |                    |                    |                    |
| 3  | Female        | 0 - 4            | 92                 | 91                 | 88                 | 87                 | 85                 | 83                 |
| 4  | Female        | 5 - 9            | 5                  | 5                  | 5                  | 5                  | 5                  | 5                  |
| 5  | Female        | 10 - 14          | 11                 | 11                 | 11                 | 11                 | 11                 | 11                 |
| 6  | Female        | 15 - 19          | 26                 | 24                 | 24                 | 24                 | 24                 | 23                 |
| 7  | Female        | 20 - 24          | 42                 | 42                 | 41                 | 38                 | 37                 | 35                 |
| 8  | Female        | 25 - 29          | 73                 | 74                 | 73                 | 71                 | 68                 | 67                 |
| 9  | Female        | 30 - 34          | 116                | 118                | 119                | 121                | 122                | 122                |
| 10 | Female        | 35 - 39          | 166                | 167                | 168                | 167                | 168                | 168                |
| 11 | Female        | 40 - 44          | 220                | 217                | 217                | 220                | 226                | 229                |
| 12 | Female        | 45 - 49          | 404                | 384                | 369                | 349                | 329                | 317                |
| 13 | Female        | 50 - 54          | 661                | 646                | 626                | 612                | 595                | 570                |
| 14 | Female        | 55 - 59          | 941                | 941                | 944                | 936                | 923                | 904                |
| 15 | Female        | 60 - 64          | 1225               | 1233               | 1240               | 1248               | 1255               | 1261               |
| 16 | Female        | 65 - 69          | 1820               | 1777               | 1754               | 1745               | 1754               | 1763               |
| 17 | Female        | 70 - 74          | 2791               | 2833               | 2882               | 2912               | 2746               | 2660               |
| 18 | Female        | 75 - 79          | 3591               | 3602               | 3595               | 3644               | 3852               | 3949               |
| 19 | Female        | 80 - 84          | 4911               | 4911               | 4900               | 4838               | 4813               | 4832               |
| 20 | Female        | 85 - 89          | 5594               | 5623               | 5646               | 5663               | 5671               | 5730               |
| 21 | Female        | 90 - 94          | 4145               | 4184               | 4239               | 4297               | 4383               | 4427               |
| 22 | Female        | 95 - 99          | 1754               | 1794               | 1777               | 1792               | 1794               | 1801               |
| 23 | Female        | 100+             | 286                | 273                | 316                | 335                | 348                | 348                |
| 24 |               |                  |                    |                    |                    |                    |                    |                    |
| 25 |               |                  |                    |                    |                    |                    |                    |                    |
| 26 |               |                  |                    |                    |                    |                    |                    |                    |
| 27 |               |                  |                    |                    |                    |                    |                    |                    |
| 28 |               |                  |                    |                    |                    |                    |                    |                    |
| 29 | Male          | 0 - 4            | 111                | 109                | 106                | 104                | 102                | 101                |
| 30 | Male          | 5 - 9            | 10                 | 10                 | 10                 | 10                 | 10                 | 10                 |
| 31 | Male          | 10 - 14          | 15                 | 14                 | 14                 | 14                 | 14                 | 14                 |
| 32 | Male          | 15 - 19          | 49                 | 47                 | 43                 | 42                 | 40                 | 40                 |
| 33 | Male          | 20 - 24          | 97                 | 92                 | 88                 | 82                 | 75                 | 71                 |
| 34 | Male          | 25 - 29          | 144                | 140                | 136                | 129                | 124                | 119                |
| 35 | Male          | 30 - 34          | 218                | 219                | 219                | 220                | 220                | 218                |
| 36 | Male          | 35 - 39          | 312                | 311                | 312                | 311                | 311                | 313                |
| 37 | Male          | 40 - 44          | 400                | 398                | 402                | 407                | 415                | 423                |
| 38 | Male          | 45 - 49          | 597                | 572                | 549                | 524                | 500                | 481                |
| 39 | Male          | 50 - 54          | 887                | 862                | 826                | 802                | 771                | 738                |
| 40 | Male          | 55 - 59          | 1312               | 1303               | 1296               | 1272               | 1246               | 1214               |
| 41 | Male          | 60 - 64          | 1740               | 1737               | 1743               | 1742               | 1743               | 1743               |
| 42 | Male          | 65 - 69          | 2505               | 2432               | 2381               | 2361               | 2365               | 2364               |
| 43 | Male          | 70 - 74          | 3615               | 3659               | 3721               | 3737               | 3514               | 3389               |
| 44 | Male          | 75 - 79          | 3897               | 3942               | 3960               | 4061               | 4345               | 4494               |
| 45 | Male          | 80 - 84          | 4481               | 4522               | 4532               | 4493               | 4511               | 4540               |
| 46 | Male          | 85 - 89          | 4007               | 4082               | 4176               | 4243               | 4290               | 4392               |
| 47 | Male          | 90 - 94          | 2194               | 2250               | 2306               | 2387               | 2496               | 2591               |
| 48 | Male          | 95 - 99          | 630                | 683                | 713                | 747                | 765                | 783                |
| 49 | Male          | 100+             | 59                 | 57                 | 70                 | 82                 | 89                 | 94                 |
| 50 |               |                  |                    |                    |                    |                    |                    |                    |
| 51 |               |                  |                    |                    |                    |                    |                    |                    |
| 52 |               |                  |                    |                    |                    |                    |                    |                    |
| 53 |               |                  |                    |                    |                    |                    |                    |                    |
| 54 |               |                  |                    |                    |                    |                    |                    |                    |
| 55 |               |                  |                    |                    |                    |                    |                    |                    |
| 56 |               |                  |                    |                    |                    |                    |                    |                    |
| 57 |               |                  |                    |                    |                    |                    |                    |                    |
| 58 |               |                  |                    |                    |                    |                    |                    |                    |
| 59 |               |                  |                    |                    |                    |                    |                    |                    |
| 60 |               |                  |                    |                    |                    |                    |                    |                    |

|    | 2024 - 2025 | 2025 - 2026 | 2026 - 2027 | 2027 - 2028 | 2028 - 2029 | 2029 - 2030 | 2030 - 2031 | 2031 - 2032 |
|----|-------------|-------------|-------------|-------------|-------------|-------------|-------------|-------------|
| 1  |             |             |             |             |             |             |             |             |
| 2  |             |             |             |             |             |             |             |             |
| 3  | 82          | 79          | 77          | 75          | 74          | 72          | 70          | 69          |
| 4  | 5           | 5           | 5           | 5           | 5           | 5           | 5           | 5           |
| 5  | 11          | 9           | 9           | 9           | 9           | 9           | 9           | 8           |
| 6  | 23          | 23          | 23          | 22          | 23          | 21          | 21          | 21          |
| 7  | 33          | 33          | 33          | 33          | 33          | 33          | 33          | 33          |
| 8  | 65          | 63          | 62          | 58          | 56          | 53          | 53          | 52          |
| 9  | 123         | 122         | 120         | 116         | 114         | 109         | 106         | 103         |
| 10 | 170         | 170         | 171         | 174         | 172         | 171         | 169         | 164         |
| 11 | 231         | 231         | 230         | 228         | 228         | 230         | 228         | 230         |
| 12 | 314         | 313         | 315         | 322         | 328         | 328         | 328         | 326         |
| 13 | 539         | 517         | 489         | 461         | 443         | 438         | 437         | 439         |
| 14 | 883         | 855         | 837         | 812         | 777         | 738         | 705         | 667         |
| 15 | 1264        | 1270        | 1260        | 1246        | 1224        | 1197        | 1161        | 1137        |
| 16 | 1779        | 1803        | 1825        | 1839        | 1853        | 1861        | 1873        | 1864        |
| 17 | 2607        | 2583        | 2580        | 2601        | 2623        | 2654        | 2683        | 2713        |
| 18 | 4018        | 4098        | 4153        | 3929        | 3817        | 3755        | 3732        | 3739        |
| 19 | 4861        | 4869        | 4946        | 5251        | 5405        | 5518        | 5643        | 5731        |
| 20 | 5762        | 5777        | 5730        | 5729        | 5792        | 5861        | 5900        | 6017        |
| 21 | 4475        | 4526        | 4588        | 4643        | 4729        | 4796        | 4849        | 4845        |
| 22 | 1829        | 1865        | 1911        | 1968        | 2001        | 2046        | 2099        | 2163        |
| 23 | 353         | 356         | 366         | 368         | 372         | 385         | 399         | 418         |
| 24 |             |             |             |             |             |             |             |             |
| 25 | 99          | 97          | 95          | 91          | 89          | 88          | 85          | 84          |
| 26 | 10          | 10          | 10          | 10          | 10          | 10          | 10          | 10          |
| 27 | 14          | 13          | 13          | 13          | 12          | 12          | 11          | 11          |
| 28 | 39          | 39          | 39          | 38          | 37          | 36          | 35          | 34          |
| 29 | 68          | 67          | 65          | 64          | 65          | 65          | 62          | 63          |
| 30 | 114         | 109         | 103         | 97          | 93          | 89          | 86          | 85          |
| 31 | 215         | 210         | 205         | 198         | 191         | 185         | 179         | 171         |
| 32 | 315         | 318         | 322         | 325         | 323         | 319         | 315         | 307         |
| 33 | 424         | 424         | 424         | 425         | 429         | 435         | 437         | 442         |
| 34 | 477         | 477         | 481         | 488         | 494         | 491         | 491         | 488         |
| 35 | 703         | 670         | 638         | 606         | 580         | 573         | 571         | 573         |
| 36 | 1180        | 1133        | 1100        | 1059        | 1013        | 966         | 924         | 879         |
| 37 | 1736        | 1732        | 1707        | 1675        | 1638        | 1598        | 1540        | 1499        |
| 38 | 2371        | 2399        | 2423        | 2433        | 2442        | 2442        | 2445        | 2420        |
| 39 | 3308        | 3260        | 3253        | 3274        | 3291        | 3315        | 3353        | 3381        |
| 40 | 4571        | 4670        | 4710        | 4457        | 4323        | 4247        | 4207        | 4218        |
| 41 | 4624        | 4673        | 4821        | 5196        | 5410        | 5537        | 5690        | 5770        |
| 42 | 4473        | 4522        | 4516        | 4569        | 4653        | 4793        | 4885        | 5072        |
| 43 | 2672        | 2769        | 2856        | 2929        | 3041        | 3137        | 3211        | 3239        |
| 44 | 819         | 855         | 906         | 964         | 1014        | 1065        | 1125        | 1182        |
| 45 | 100         | 108         | 115         | 120         | 125         | 135         | 145         | 160         |
| 46 |             |             |             |             |             |             |             |             |
| 47 |             |             |             |             |             |             |             |             |
| 48 |             |             |             |             |             |             |             |             |
| 49 |             |             |             |             |             |             |             |             |
| 50 |             |             |             |             |             |             |             |             |
| 51 |             |             |             |             |             |             |             |             |
| 52 |             |             |             |             |             |             |             |             |
| 53 |             |             |             |             |             |             |             |             |
| 54 |             |             |             |             |             |             |             |             |
| 55 |             |             |             |             |             |             |             |             |
| 56 |             |             |             |             |             |             |             |             |
| 57 |             |             |             |             |             |             |             |             |
| 58 |             |             |             |             |             |             |             |             |
| 59 |             |             |             |             |             |             |             |             |
| 60 |             |             |             |             |             |             |             |             |



|    | 2032 - 2033 | 2033 - 2034 | 2034 - 2035 | 2035 - 2036 | 2036 - 2037 | 2037 - 2038 | 2038 - 2039 | 2039 - 2040 |
|----|-------------|-------------|-------------|-------------|-------------|-------------|-------------|-------------|
| 1  |             |             |             |             |             |             |             |             |
| 2  |             |             |             |             |             |             |             |             |
| 3  | 67          | 66          | 66          | 65          | 63          | 62          | 60          | 60          |
| 4  | 5           | 5           | 5           | 5           | 5           | 5           | 5           | 5           |
| 5  | 9           | 8           | 8           | 8           | 8           | 8           | 8           | 8           |
| 6  |             |             |             |             |             |             |             |             |
| 7  | 19          | 19          | 19          | 19          | 18          | 18          | 18          | 18          |
| 8  | 33          | 32          | 32          | 31          | 30          | 28          | 28          | 28          |
| 9  | 52          | 54          | 56          | 55          | 55          | 55          | 54          | 53          |
| 10 | 97          | 95          | 91          | 91          | 90          | 90          | 92          | 92          |
| 11 | 159         | 155         | 150         | 145         | 139         | 133         | 127         | 125         |
| 12 | 233         | 229         | 228         | 224         | 218         | 210         | 204         | 197         |
| 13 | 323         | 324         | 326         | 324         | 326         | 329         | 325         | 322         |
| 14 | 450         | 458         | 458         | 456         | 454         | 449         | 451         | 452         |
| 15 | 629         | 607         | 598         | 596         | 600         | 615         | 624         | 625         |
| 16 |             |             |             |             |             |             |             |             |
| 17 | 1104        | 1059        | 1008        | 965         | 912         | 862         | 831         | 820         |
| 18 | 1847        | 1819        | 1780        | 1730        | 1696        | 1652        | 1588        | 1514        |
| 19 | 2739        | 2765        | 2784        | 2808        | 2798        | 2778        | 2740        | 2688        |
| 20 | 3784        | 3831        | 3890        | 3943        | 3999        | 4049        | 4097        | 4134        |
| 21 | 5448        | 5319        | 5256        | 5247        | 5282        | 5369        | 5458        | 5563        |
| 22 | 6444        | 6677        | 6849        | 7015        | 7131        | 6831        | 6717        | 6682        |
| 23 | 4888        | 5000        | 5114        | 5187        | 5322        | 5802        | 6072        | 6260        |
| 24 | 2226        | 2297        | 2360        | 2418        | 2444        | 2502        | 2606        | 2707        |
| 25 | 437         | 449         | 472         | 497         | 527         | 554         | 584         | 614         |
| 26 |             |             |             |             |             |             |             |             |
| 27 |             |             |             |             |             |             |             |             |
| 28 |             |             |             |             |             |             |             |             |
| 29 | 83          | 82          | 80          | 79          | 77          | 77          | 76          | 76          |
| 30 | 8           | 8           | 7           | 7           | 6           | 6           | 5           | 5           |
| 31 | 11          | 11          | 11          | 10          | 10          | 10          | 10          | 10          |
| 32 | 33          | 32          | 31          | 31          | 30          | 30          | 30          | 29          |
| 33 | 61          | 61          | 59          | 58          | 57          | 54          | 53          | 52          |
| 34 | 86          | 85          | 85          | 85          | 86          | 85          | 84          | 83          |
| 35 | 163         | 156         | 152         | 149         | 147         | 149         | 150         | 149         |
| 36 | 298         | 290         | 281         | 273         | 262         | 249         | 239         | 234         |
| 37 | 447         | 443         | 439         | 433         | 421         | 410         | 399         | 386         |
| 38 | 488         | 492         | 497         | 498         | 504         | 507         | 503         | 497         |
| 39 | 581         | 588         | 586         | 584         | 581         | 578         | 583         | 588         |
| 40 | 834         | 801         | 791         | 790         | 792         | 805         | 817         | 815         |
| 41 | 1447        | 1391        | 1329        | 1274        | 1216        | 1158        | 1113        | 1102        |
| 42 | 2387        | 2342        | 2292        | 2214        | 2165        | 2095        | 2019        | 1935        |
| 43 | 3410        | 3437        | 3450        | 3467        | 3441        | 3407        | 3351        | 3290        |
| 44 | 4271        | 4315        | 4371        | 4441        | 4498        | 4556        | 4613        | 4647        |
| 45 | 5498        | 5372        | 5311        | 5296        | 5345        | 5445        | 5535        | 5636        |
| 46 | 5538        | 5821        | 6002        | 6180        | 6274        | 6043        | 5960        | 5948        |
| 47 | 3316        | 3430        | 3587        | 3694        | 3872        | 4309        | 4578        | 4758        |
| 48 | 1237        | 1310        | 1376        | 1432        | 1459        | 1522        | 1611        | 1721        |
| 49 | 175         | 188         | 202         | 220         | 235         | 256         | 282         | 301         |
| 50 |             |             |             |             |             |             |             |             |
| 51 |             |             |             |             |             |             |             |             |
| 52 |             |             |             |             |             |             |             |             |
| 53 |             |             |             |             |             |             |             |             |
| 54 |             |             |             |             |             |             |             |             |
| 55 |             |             |             |             |             |             |             |             |
| 56 |             |             |             |             |             |             |             |             |
| 57 |             |             |             |             |             |             |             |             |
| 58 |             |             |             |             |             |             |             |             |
| 59 |             |             |             |             |             |             |             |             |
| 60 |             |             |             |             |             |             |             |             |

|    |                    |
|----|--------------------|
| 1  |                    |
| 2  | <b>2040 - 2041</b> |
| 3  | 60                 |
| 4  | 5                  |
| 5  | 7                  |
| 6  | 18                 |
| 7  | 28                 |
| 8  | 53                 |
| 9  | 92                 |
| 10 | 122                |
| 11 | 190                |
| 12 | 316                |
| 13 | 452                |
| 14 | 624                |
| 15 | 819                |
| 16 | 1451               |
| 17 | 2616               |
| 18 | 4179               |
| 19 | 5660               |
| 20 | 6712               |
| 21 | 6413               |
| 22 | 2780               |
| 23 | 643                |
| 24 |                    |
| 25 | 74                 |
| 26 | 5                  |
| 27 | 10                 |
| 28 | 28                 |
| 29 | 52                 |
| 30 | 82                 |
| 31 | 150                |
| 32 | 230                |
| 33 | 375                |
| 34 | 489                |
| 35 | 592                |
| 36 | 814                |
| 37 | 1105               |
| 38 | 1860               |
| 39 | 3191               |
| 40 | 4689               |
| 41 | 5755               |
| 42 | 5983               |
| 43 | 4916               |
| 44 | 1795               |
| 45 | 321                |
| 46 |                    |
| 47 |                    |
| 48 |                    |
| 49 |                    |
| 50 |                    |
| 51 |                    |
| 52 |                    |
| 53 |                    |
| 54 |                    |
| 55 |                    |
| 56 |                    |
| 57 |                    |
| 58 |                    |
| 59 |                    |
| 60 |                    |

For peer review only

1  
2  
3  
4  
5  
6  
7  
8  
9  
10  
11  
12  
13  
14  
15  
16  
17  
18  
19  
20  
21  
22  
23  
24  
25  
26  
27  
28  
29  
30  
31  
32  
33  
34  
35  
36  
37  
38  
39  
40  
41  
42  
43  
44  
45  
46  
47  
48  
49  
50  
51  
52  
53  
54  
55  
56  
57  
58  
59  
60

|               | Baseline |        |        |        |        |        |        |
|---------------|----------|--------|--------|--------|--------|--------|--------|
|               | 2007     | 2008   | 2009   | 2010   | 2011   | 2012   | 2013   |
| 75% of Deaths | 41,988   | 41,775 | 40,391 | 40,475 | 40,246 | 41,203 | 41,025 |

For peer review only

| <b>2014</b> | <b>2015</b> | <b>2016</b> | <b>2017</b> | <b>2018</b> | <b>2019</b> | <b>2020</b> | <b>2021</b> | <b>2022</b> |
|-------------|-------------|-------------|-------------|-------------|-------------|-------------|-------------|-------------|
| 40,679      | 43,180      | 42,541      | 43,403      | 42,116      | 42,293      | 42,478      | 42,664      | 42,866      |

For peer review only

1  
2  
3  
4  
5  
6  
7  
8  
9  
10  
11  
12  
13  
14  
15  
16  
17  
18  
19  
20  
21  
22  
23  
24  
25  
26  
27  
28  
29  
30  
31  
32  
33  
34  
35  
36  
37  
38  
39  
40  
41  
42  
43  
44  
45  
46  
47  
48  
49  
50  
51  
52  
53  
54  
55  
56  
57  
58  
59  
60

| Projected |        |        |        |        |        |        |        |        |  |
|-----------|--------|--------|--------|--------|--------|--------|--------|--------|--|
| 2023      | 2024   | 2025   | 2026   | 2027   | 2028   | 2029   | 2030   | 2031   |  |
| 43,078    | 43,319 | 43,592 | 43,899 | 44,190 | 44,513 | 44,864 | 45,233 | 45,624 |  |

For peer review only

|  | <b>2032</b> | <b>2033</b> | <b>2034</b> | <b>2035</b> | <b>2036</b> | <b>2037</b> | <b>2038</b> | <b>2039</b> | <b>2040</b> |
|--|-------------|-------------|-------------|-------------|-------------|-------------|-------------|-------------|-------------|
|  | 46,024      | 46,442      | 46,867      | 47,283      | 47,696      | 48,114      | 48,525      | 48,922      | 49,317      |

For peer review only

1  
2  
3  
4  
5  
6  
7  
8  
9  
10  
11  
12  
13  
14  
15  
16  
17  
18  
19  
20  
21  
22  
23  
24  
25  
26  
27  
28  
29  
30  
31  
32  
33  
34  
35  
36  
37  
38  
39  
40  
41  
42  
43  
44  
45  
46  
47  
48  
49  
50  
51  
52  
53  
54  
55  
56  
57  
58  
59  
60

|                                 | Baseline      |               |               |               |               |               |
|---------------------------------|---------------|---------------|---------------|---------------|---------------|---------------|
| Group                           | 2007          | 2008          | 2009          | 2010          | 2011          | 2012          |
| Females 0 - 4                   | 5             | 3             | 4             | 2             | 7             | 6             |
| Females 5 - 9                   | 4             | 7             | 5             | 2             | 2             | 3             |
| Females 10 - 14                 | 6             | 8             | 4             | 4             | 5             | 1             |
| Females 15 - 19                 | 8             | 11            | 9             | 9             | 11            | 4             |
| Females 20 - 24                 | 15            | 12            | 10            | 11            | 12            | 9             |
| Females 25 - 29                 | 23            | 14            | 21            | 14            | 24            | 27            |
| Females 30 - 34                 | 49            | 39            | 45            | 40            | 39            | 39            |
| Females 35 - 39                 | 103           | 103           | 90            | 85            | 96            | 66            |
| Females 40 - 44                 | 192           | 186           | 200           | 192           | 160           | 180           |
| Females 45 - 49                 | 360           | 311           | 314           | 297           | 330           | 291           |
| Females 50 - 54                 | 490           | 460           | 498           | 482           | 510           | 500           |
| Females 55 - 59                 | 706           | 741           | 690           | 671           | 665           | 691           |
| Females 60 - 64                 | 1,147         | 1,141         | 1,121         | 1,133         | 1,088         | 1,058         |
| Females 65 - 69                 | 1,592         | 1,509         | 1,455         | 1,478         | 1,431         | 1,529         |
| Females 70 - 74                 | 2,181         | 2,180         | 2,106         | 2,099         | 1,995         | 2,125         |
| Females 75 - 79                 | 3,014         | 3,181         | 2,906         | 2,845         | 2,834         | 2,952         |
| Females 80 - 84                 | 3,913         | 3,867         | 3,639         | 3,744         | 3,662         | 3,897         |
| Females 85 - 89                 | 3,872         | 4,061         | 4,007         | 3,790         | 3,837         | 4,074         |
| Females 90 - 94                 | 2,575         | 2,431         | 2,375         | 2,475         | 2,661         | 2,990         |
| Females 95 - 99                 | 1,040         | 1,066         | 998           | 1,080         | 1,093         | 1,127         |
| Females 100+                    | 179           | 170           | 218           | 202           | 209           | 224           |
| Males 0 - 4                     | 10            | 5             | 3             | 7             | 5             | 10            |
| Males 5 - 9                     | 1             | 4             | 5             | 6             | 4             | 3             |
| Males 10 - 14                   | 9             | 5             | 2             | 1             | 5             | 4             |
| Males 15 - 19                   | 10            | 10            | 10            | 9             | 10            | 11            |
| Males 20 - 24                   | 23            | 15            | 9             | 15            | 15            | 6             |
| Males 25 - 29                   | 23            | 27            | 21            | 36            | 32            | 18            |
| Males 30 - 34                   | 65            | 40            | 44            | 46            | 52            | 61            |
| Males 35 - 39                   | 127           | 132           | 111           | 109           | 92            | 92            |
| Males 40 - 44                   | 276           | 229           | 251           | 216           | 245           | 182           |
| Males 45 - 49                   | 408           | 472           | 397           | 406           | 363           | 380           |
| Males 50 - 54                   | 743           | 672           | 699           | 707           | 593           | 615           |
| Males 55 - 59                   | 1,156         | 1,112         | 979           | 1,010         | 967           | 967           |
| Males 60 - 64                   | 1,665         | 1,647         | 1,612         | 1,619         | 1,572         | 1,507         |
| Males 65 - 69                   | 2,094         | 2,187         | 2,059         | 1,946         | 1,975         | 2,058         |
| Males 70 - 74                   | 2,879         | 2,763         | 2,651         | 2,550         | 2,675         | 2,554         |
| Males 75 - 79                   | 3,378         | 3,116         | 3,123         | 3,201         | 3,050         | 3,123         |
| Males 80 - 84                   | 3,311         | 3,233         | 3,152         | 3,285         | 3,324         | 3,203         |
| Males 85 - 89                   | 2,352         | 2,382         | 2,513         | 2,399         | 2,600         | 2,707         |
| Males 90 - 94                   | 1,044         | 992           | 888           | 1,095         | 1,160         | 1,298         |
| Males 95 - 99                   | 241           | 256           | 293           | 282           | 292           | 288           |
| Males 100+                      | 21            | 37            | 29            | 31            | 28            | 34            |
| <b>Palliative Care Deaths</b>   | <b>41,310</b> | <b>40,837</b> | <b>39,566</b> | <b>39,631</b> | <b>39,730</b> | <b>40,914</b> |
| <b>Percentage of All Deaths</b> | <b>73.79%</b> | <b>73.32%</b> | <b>73.47%</b> | <b>73.44%</b> | <b>74.04%</b> | <b>74.47%</b> |

1  
2  
3  
4  
5  
6  
7  
8  
9  
10  
11  
12  
13  
14  
15  
16  
17  
18  
19  
20  
21  
22  
23  
24  
25  
26  
27  
28  
29  
30  
31  
32  
33  
34  
35  
36  
37  
38  
39  
40  
41  
42  
43  
44  
45  
46  
47  
48  
49  
50  
51  
52  
53  
54  
55  
56  
57  
58  
59  
60

| 2013   | 2014   | 2015   | 2016   | 2017   | 2018   | 2019   | 2020   | 2021   |
|--------|--------|--------|--------|--------|--------|--------|--------|--------|
| 6      | 2      | 2      | 2      | 7      | 8      | 8      | 7      | 7      |
| 1      | 2      | 1      | 2      | 3      | 2      | 2      | 2      | 2      |
| 5      | 5      | 2      | 4      | 6      | 4      | 4      | 4      | 4      |
| 11     | 8      | 5      | 7      | 7      | 6      | 5      | 5      | 5      |
| 8      | 8      | 9      | 10     | 10     | 10     | 10     | 9      | 9      |
| 19     | 14     | 26     | 20     | 14     | 18     | 18     | 18     | 17     |
| 48     | 37     | 45     | 42     | 39     | 44     | 45     | 46     | 46     |
| 84     | 59     | 79     | 80     | 73     | 59     | 59     | 59     | 59     |
| 150    | 169    | 134    | 163    | 131    | 109    | 108    | 108    | 109    |
| 287    | 286    | 312    | 268    | 249    | 250    | 237    | 228    | 216    |
| 502    | 462    | 482    | 478    | 513    | 494    | 482    | 467    | 457    |
| 688    | 719    | 701    | 702    | 720    | 712    | 712    | 714    | 708    |
| 1,037  | 959    | 932    | 986    | 1,021  | 979    | 986    | 991    | 998    |
| 1,546  | 1,504  | 1,576  | 1,538  | 1,513  | 1,459  | 1,425  | 1,406  | 1,399  |
| 2,085  | 1,945  | 2,100  | 2,070  | 2,119  | 2,244  | 2,277  | 2,317  | 2,341  |
| 2,878  | 2,810  | 2,871  | 2,843  | 2,930  | 2,824  | 2,832  | 2,827  | 2,866  |
| 3,721  | 3,648  | 3,771  | 3,612  | 3,736  | 3,749  | 3,749  | 3,741  | 3,693  |
| 4,020  | 3,945  | 4,184  | 4,123  | 4,316  | 4,214  | 4,235  | 4,253  | 4,266  |
| 3,023  | 3,030  | 3,387  | 3,037  | 3,311  | 3,104  | 3,133  | 3,174  | 3,217  |
| 1,066  | 1,025  | 1,210  | 1,213  | 1,316  | 1,234  | 1,262  | 1,250  | 1,260  |
| 226    | 239    | 241    | 228    | 205    | 182    | 173    | 201    | 213    |
| 6      | 5      | 3      | 3      | 4      | 4      | 4      | 4      | 4      |
| 3      | 6      | 4      | 7      | 3      | 4      | 4      | 4      | 4      |
| 8      | 4      | 7      | 3      | 5      | 4      | 4      | 4      | 4      |
| 7      | 6      | 9      | 7      | 10     | 9      | 9      | 8      | 8      |
| 8      | 10     | 10     | 12     | 7      | 7      | 7      | 6      | 6      |
| 22     | 17     | 28     | 36     | 20     | 17     | 17     | 16     | 15     |
| 52     | 36     | 59     | 44     | 54     | 45     | 46     | 46     | 46     |
| 77     | 91     | 82     | 67     | 98     | 90     | 90     | 90     | 90     |
| 217    | 203    | 188    | 191    | 163    | 146    | 145    | 147    | 149    |
| 386    | 367    | 371    | 389    | 390    | 317    | 304    | 291    | 278    |
| 648    | 603    | 639    | 655    | 602    | 544    | 528    | 506    | 492    |
| 984    | 947    | 953    | 1,022  | 945    | 951    | 944    | 939    | 922    |
| 1,392  | 1,379  | 1,435  | 1,398  | 1,413  | 1,367  | 1,364  | 1,369  | 1,368  |
| 2,101  | 2,131  | 2,252  | 2,237  | 2,085  | 2,007  | 1,948  | 1,907  | 1,891  |
| 2,582  | 2,526  | 2,679  | 2,582  | 2,726  | 2,896  | 2,931  | 2,981  | 2,994  |
| 3,120  | 3,095  | 3,187  | 3,005  | 3,256  | 3,074  | 3,109  | 3,123  | 3,203  |
| 3,412  | 3,306  | 3,482  | 3,499  | 3,594  | 3,487  | 3,519  | 3,526  | 3,496  |
| 2,688  | 2,803  | 2,898  | 2,841  | 3,054  | 3,011  | 3,068  | 3,138  | 3,189  |
| 1,431  | 1,462  | 1,654  | 1,572  | 1,639  | 1,541  | 1,580  | 1,619  | 1,676  |
| 297    | 307    | 354    | 398    | 454    | 421    | 457    | 477    | 499    |
| 33     | 41     | 37     | 56     | 55     | 36     | 35     | 43     | 51     |
| 40,885 | 40,221 | 42,401 | 41,452 | 42,816 | 41,678 | 41,873 | 42,072 | 42,275 |
| 74.74% | 74.16% | 73.65% | 73.08% | 73.99% | 74.22% | 74.26% | 74.28% | 74.32% |



1  
2  
3  
4  
5  
6  
7  
8  
9  
10  
11  
12  
13  
14  
15  
16  
17  
18  
19  
20  
21  
22  
23  
24  
25  
26  
27  
28  
29  
30  
31  
32  
33  
34  
35  
36  
37  
38  
39  
40  
41  
42  
43  
44  
45  
46  
47  
48  
49  
50  
51  
52  
53  
54  
55  
56  
57  
58  
59  
60

## Projected

| 2022   | 2023   | 2024   | 2025   | 2026   | 2027   | 2028   | 2029   | 2030   |
|--------|--------|--------|--------|--------|--------|--------|--------|--------|
| 7      | 7      | 7      | 7      | 6      | 6      | 6      | 6      | 6      |
| 2      | 2      | 2      | 2      | 2      | 2      | 2      | 2      | 2      |
| 4      | 4      | 4      | 3      | 3      | 3      | 3      | 3      | 3      |
| 5      | 5      | 5      | 5      | 5      | 5      | 5      | 5      | 5      |
| 8      | 8      | 8      | 8      | 8      | 8      | 8      | 8      | 8      |
| 16     | 16     | 16     | 15     | 15     | 14     | 14     | 13     | 13     |
| 47     | 47     | 47     | 47     | 46     | 44     | 44     | 42     | 41     |
| 59     | 59     | 60     | 60     | 60     | 61     | 61     | 60     | 60     |
| 112    | 114    | 115    | 115    | 114    | 113    | 113    | 114    | 113    |
| 203    | 196    | 194    | 193    | 195    | 199    | 203    | 203    | 203    |
| 444    | 426    | 402    | 386    | 365    | 344    | 331    | 327    | 326    |
| 698    | 684    | 668    | 647    | 633    | 614    | 588    | 558    | 533    |
| 1,003  | 1,008  | 1,011  | 1,015  | 1,007  | 996    | 979    | 957    | 928    |
| 1,406  | 1,414  | 1,426  | 1,446  | 1,463  | 1,475  | 1,486  | 1,492  | 1,502  |
| 2,207  | 2,138  | 2,096  | 2,076  | 2,074  | 2,091  | 2,109  | 2,133  | 2,157  |
| 3,029  | 3,105  | 3,160  | 3,223  | 3,266  | 3,090  | 3,002  | 2,953  | 2,935  |
| 3,674  | 3,689  | 3,711  | 3,717  | 3,776  | 4,009  | 4,126  | 4,212  | 4,308  |
| 4,272  | 4,316  | 4,340  | 4,351  | 4,316  | 4,315  | 4,363  | 4,415  | 4,444  |
| 3,282  | 3,315  | 3,351  | 3,389  | 3,435  | 3,476  | 3,541  | 3,591  | 3,631  |
| 1,262  | 1,267  | 1,286  | 1,312  | 1,344  | 1,384  | 1,407  | 1,439  | 1,476  |
| 221    | 221    | 224    | 226    | 232    | 234    | 236    | 244    | 253    |
| 3      | 3      | 3      | 3      | 3      | 3      | 3      | 3      | 3      |
| 4      | 4      | 4      | 4      | 4      | 4      | 4      | 4      | 4      |
| 4      | 4      | 4      | 3      | 3      | 3      | 3      | 3      | 3      |
| 8      | 8      | 7      | 7      | 7      | 7      | 7      | 7      | 7      |
| 5      | 5      | 5      | 5      | 5      | 5      | 5      | 5      | 4      |
| 15     | 14     | 14     | 13     | 12     | 12     | 11     | 11     | 10     |
| 46     | 45     | 45     | 44     | 43     | 41     | 40     | 39     | 37     |
| 90     | 90     | 91     | 92     | 93     | 94     | 93     | 92     | 91     |
| 152    | 155    | 155    | 155    | 155    | 155    | 157    | 159    | 160    |
| 265    | 255    | 253    | 253    | 255    | 259    | 262    | 261    | 261    |
| 473    | 452    | 431    | 411    | 391    | 371    | 356    | 351    | 350    |
| 903    | 880    | 855    | 821    | 797    | 767    | 734    | 700    | 670    |
| 1,369  | 1,369  | 1,364  | 1,360  | 1,341  | 1,316  | 1,287  | 1,255  | 1,210  |
| 1,894  | 1,894  | 1,899  | 1,922  | 1,941  | 1,949  | 1,956  | 1,956  | 1,958  |
| 2,815  | 2,715  | 2,650  | 2,611  | 2,606  | 2,623  | 2,636  | 2,656  | 2,686  |
| 3,427  | 3,545  | 3,605  | 3,684  | 3,715  | 3,516  | 3,410  | 3,350  | 3,318  |
| 3,510  | 3,533  | 3,598  | 3,636  | 3,751  | 4,043  | 4,209  | 4,308  | 4,427  |
| 3,224  | 3,300  | 3,361  | 3,398  | 3,394  | 3,433  | 3,497  | 3,602  | 3,671  |
| 1,753  | 1,819  | 1,876  | 1,944  | 2,006  | 2,057  | 2,135  | 2,203  | 2,255  |
| 512    | 524    | 548    | 572    | 606    | 645    | 678    | 712    | 752    |
| 55     | 58     | 62     | 67     | 71     | 74     | 77     | 83     | 90     |
| 42,489 | 42,711 | 42,961 | 43,247 | 43,565 | 43,860 | 44,184 | 44,536 | 44,912 |
| 74.34% | 74.36% | 74.38% | 74.41% | 74.43% | 74.44% | 74.44% | 74.45% | 74.47% |

1  
2  
3  
4  
5  
6  
7  
8  
9  
10  
11  
12  
13  
14  
15  
16  
17  
18  
19  
20  
21  
22  
23  
24  
25  
26  
27  
28  
29  
30  
31  
32  
33  
34  
35  
36  
37  
38  
39  
40  
41  
42  
43  
44  
45  
46  
47  
48  
49  
50  
51  
52  
53  
54  
55  
56  
57  
58  
59  
60

|  | 2031   | 2032   | 2033   | 2034   | 2035   | 2036   | 2037   | 2038   | 2039   |
|--|--------|--------|--------|--------|--------|--------|--------|--------|--------|
|  | 6      | 6      | 6      | 6      | 5      | 5      | 5      | 5      | 5      |
|  | 2      | 2      | 2      | 2      | 2      | 2      | 2      | 2      | 2      |
|  | 3      | 3      | 3      | 3      | 3      | 3      | 3      | 3      | 3      |
|  | 5      | 4      | 4      | 4      | 4      | 4      | 4      | 4      | 4      |
|  | 8      | 8      | 7      | 7      | 7      | 7      | 6      | 6      | 6      |
|  | 13     | 13     | 13     | 14     | 13     | 13     | 13     | 13     | 13     |
|  | 39     | 37     | 36     | 35     | 35     | 34     | 34     | 35     | 35     |
|  | 58     | 56     | 55     | 53     | 51     | 49     | 47     | 45     | 44     |
|  | 114    | 116    | 114    | 113    | 111    | 108    | 104    | 101    | 98     |
|  | 201    | 200    | 200    | 201    | 200    | 201    | 203    | 201    | 199    |
|  | 328    | 336    | 342    | 342    | 341    | 339    | 335    | 337    | 338    |
|  | 504    | 476    | 459    | 452    | 451    | 454    | 465    | 472    | 473    |
|  | 909    | 883    | 847    | 806    | 772    | 729    | 689    | 664    | 656    |
|  | 1,495  | 1,481  | 1,458  | 1,427  | 1,387  | 1,360  | 1,325  | 1,273  | 1,214  |
|  | 2,181  | 2,202  | 2,223  | 2,238  | 2,257  | 2,249  | 2,233  | 2,203  | 2,161  |
|  | 2,940  | 2,976  | 3,013  | 3,059  | 3,101  | 3,145  | 3,184  | 3,222  | 3,251  |
|  | 4,375  | 4,159  | 4,060  | 4,012  | 4,005  | 4,032  | 4,099  | 4,167  | 4,247  |
|  | 4,532  | 4,854  | 5,029  | 5,159  | 5,284  | 5,371  | 5,145  | 5,059  | 5,033  |
|  | 3,628  | 3,660  | 3,744  | 3,829  | 3,884  | 3,985  | 4,344  | 4,546  | 4,687  |
|  | 1,521  | 1,566  | 1,616  | 1,660  | 1,701  | 1,719  | 1,760  | 1,833  | 1,904  |
|  | 265    | 277    | 285    | 300    | 315    | 334    | 352    | 371    | 390    |
|  | 3      | 3      | 3      | 3      | 3      | 3      | 3      | 3      | 3      |
|  | 4      | 3      | 3      | 3      | 3      | 3      | 3      | 2      | 2      |
|  | 3      | 3      | 3      | 3      | 3      | 3      | 3      | 3      | 3      |
|  | 6      | 6      | 6      | 6      | 6      | 6      | 6      | 6      | 5      |
|  | 5      | 4      | 4      | 4      | 4      | 4      | 4      | 4      | 4      |
|  | 10     | 10     | 10     | 10     | 10     | 10     | 10     | 10     | 10     |
|  | 36     | 34     | 33     | 32     | 31     | 31     | 31     | 31     | 31     |
|  | 89     | 86     | 84     | 81     | 79     | 76     | 72     | 69     | 68     |
|  | 162    | 163    | 162    | 160    | 158    | 154    | 150    | 146    | 141    |
|  | 259    | 259    | 261    | 264    | 264    | 267    | 269    | 267    | 264    |
|  | 351    | 356    | 360    | 359    | 358    | 356    | 354    | 357    | 360    |
|  | 637    | 604    | 580    | 573    | 573    | 574    | 583    | 592    | 591    |
|  | 1,177  | 1,137  | 1,093  | 1,044  | 1,001  | 955    | 910    | 874    | 866    |
|  | 1,938  | 1,912  | 1,876  | 1,836  | 1,773  | 1,734  | 1,678  | 1,617  | 1,550  |
|  | 2,708  | 2,732  | 2,753  | 2,764  | 2,777  | 2,756  | 2,729  | 2,684  | 2,635  |
|  | 3,327  | 3,369  | 3,403  | 3,448  | 3,503  | 3,548  | 3,594  | 3,639  | 3,665  |
|  | 4,490  | 4,278  | 4,180  | 4,132  | 4,121  | 4,159  | 4,237  | 4,307  | 4,385  |
|  | 3,811  | 4,162  | 4,374  | 4,510  | 4,644  | 4,715  | 4,541  | 4,479  | 4,470  |
|  | 2,275  | 2,329  | 2,409  | 2,519  | 2,594  | 2,719  | 3,026  | 3,215  | 3,341  |
|  | 790    | 827    | 876    | 920    | 957    | 976    | 1,018  | 1,077  | 1,151  |
|  | 99     | 108    | 116    | 125    | 136    | 145    | 158    | 174    | 186    |
|  | 45,306 | 45,697 | 46,105 | 46,517 | 46,927 | 47,337 | 47,730 | 48,117 | 48,491 |
|  | 74.48% | 74.47% | 74.46% | 74.44% | 74.44% | 74.44% | 74.40% | 74.37% | 74.34% |

|    |             |
|----|-------------|
| 1  |             |
| 2  |             |
| 3  |             |
| 4  | <b>2040</b> |
| 5  | 5           |
| 6  | 2           |
| 7  | 2           |
| 8  | 4           |
| 9  | 6           |
| 10 | 13          |
| 11 | 35          |
| 12 | 43          |
| 13 | 94          |
| 14 | 195         |
| 15 | 338         |
| 16 | 472         |
| 17 | 655         |
| 18 | 1,163       |
| 19 | 2,103       |
| 20 | 3,286       |
| 21 | 4,321       |
| 22 | 5,056       |
| 23 | 4,802       |
| 24 | 1,955       |
| 25 | 408         |
| 26 |             |
| 27 | 3           |
| 28 | 2           |
| 29 | 3           |
| 30 | 5           |
| 31 | 4           |
| 32 | 10          |
| 33 | 31          |
| 34 | 66          |
| 35 | 137         |
| 36 | 259         |
| 37 | 363         |
| 38 | 590         |
| 39 | 868         |
| 40 | 1,490       |
| 41 | 2,556       |
| 42 | 3,698       |
| 43 | 4,478       |
| 44 | 4,496       |
| 45 | 3,452       |
| 46 | 1,200       |
| 47 | 198         |
| 48 |             |
| 49 | 48,869      |
| 50 | 74.32%      |
| 51 |             |
| 52 |             |
| 53 |             |
| 54 |             |
| 55 |             |
| 56 |             |
| 57 |             |
| 58 |             |
| 59 |             |
| 60 |             |

For peer review only

|                                 | Baseline      |               |               |               |               |               |
|---------------------------------|---------------|---------------|---------------|---------------|---------------|---------------|
| Group                           | 2007          | 2008          | 2009          | 2010          | 2011          | 2012          |
| Females 0 - 4                   | 5             | 3             | 4             | 2             | 7             | 6             |
| Females 5 - 9                   | 4             | 7             | 5             | 2             | 2             | 3             |
| Females 10 - 14                 | 6             | 8             | 4             | 4             | 5             | 1             |
| Females 15 - 19                 | 8             | 11            | 9             | 9             | 11            | 4             |
| Females 20 - 24                 | 15            | 12            | 10            | 11            | 12            | 9             |
| Females 25 - 29                 | 23            | 14            | 21            | 14            | 24            | 27            |
| Females 30 - 34                 | 49            | 39            | 45            | 40            | 39            | 39            |
| Females 35 - 39                 | 103           | 103           | 90            | 85            | 96            | 66            |
| Females 40 - 44                 | 192           | 186           | 200           | 192           | 160           | 180           |
| Females 45 - 49                 | 360           | 311           | 314           | 297           | 330           | 291           |
| Females 50 - 54                 | 490           | 460           | 498           | 482           | 510           | 500           |
| Females 55 - 59                 | 706           | 741           | 690           | 671           | 665           | 691           |
| Females 60 - 64                 | 1,147         | 1,141         | 1,121         | 1,133         | 1,088         | 1,058         |
| Females 65 - 69                 | 1,592         | 1,509         | 1,455         | 1,478         | 1,431         | 1,529         |
| Females 70 - 74                 | 2,181         | 2,180         | 2,106         | 2,099         | 1,995         | 2,125         |
| Females 75 - 79                 | 3,014         | 3,181         | 2,906         | 2,845         | 2,834         | 2,952         |
| Females 80 - 84                 | 3,913         | 3,867         | 3,639         | 3,744         | 3,662         | 3,897         |
| Females 85 - 89                 | 3,872         | 4,061         | 4,007         | 3,790         | 3,837         | 4,074         |
| Females 90 - 94                 | 2,575         | 2,431         | 2,375         | 2,475         | 2,661         | 2,990         |
| Females 95 - 99                 | 1,040         | 1,066         | 998           | 1,080         | 1,093         | 1,127         |
| Females 100+                    | 179           | 170           | 218           | 202           | 209           | 224           |
| Males 0 - 4                     | 10            | 5             | 3             | 7             | 5             | 10            |
| Males 5 - 9                     | 1             | 4             | 5             | 6             | 4             | 3             |
| Males 10 - 14                   | 9             | 5             | 2             | 1             | 5             | 4             |
| Males 15 - 19                   | 10            | 10            | 10            | 9             | 10            | 11            |
| Males 20 - 24                   | 23            | 15            | 9             | 15            | 15            | 6             |
| Males 25 - 29                   | 23            | 27            | 21            | 36            | 32            | 18            |
| Males 30 - 34                   | 65            | 40            | 44            | 46            | 52            | 61            |
| Males 35 - 39                   | 127           | 132           | 111           | 109           | 92            | 92            |
| Males 40 - 44                   | 276           | 229           | 251           | 216           | 245           | 182           |
| Males 45 - 49                   | 408           | 472           | 397           | 406           | 363           | 380           |
| Males 50 - 54                   | 743           | 672           | 699           | 707           | 593           | 615           |
| Males 55 - 59                   | 1,156         | 1,112         | 979           | 1,010         | 967           | 967           |
| Males 60 - 64                   | 1,665         | 1,647         | 1,612         | 1,619         | 1,572         | 1,507         |
| Males 65 - 69                   | 2,094         | 2,187         | 2,059         | 1,946         | 1,975         | 2,058         |
| Males 70 - 74                   | 2,879         | 2,763         | 2,651         | 2,550         | 2,675         | 2,554         |
| Males 75 - 79                   | 3,378         | 3,116         | 3,123         | 3,201         | 3,050         | 3,123         |
| Males 80 - 84                   | 3,311         | 3,233         | 3,152         | 3,285         | 3,324         | 3,203         |
| Males 85 - 89                   | 2,352         | 2,382         | 2,513         | 2,399         | 2,600         | 2,707         |
| Males 90 - 94                   | 1,044         | 992           | 888           | 1,095         | 1,160         | 1,298         |
| Males 95 - 99                   | 241           | 256           | 293           | 282           | 292           | 288           |
| Males 100+                      | 21            | 37            | 29            | 31            | 28            | 34            |
| <b>Palliative Care Deaths</b>   | <b>41,310</b> | <b>40,837</b> | <b>39,566</b> | <b>39,631</b> | <b>39,730</b> | <b>40,914</b> |
| <b>Percentage of All Deaths</b> | <b>73.79%</b> | <b>73.32%</b> | <b>73.47%</b> | <b>73.44%</b> | <b>74.04%</b> | <b>74.47%</b> |

|    | 2013   | 2014   | 2015   | 2016   | 2017   | 2018   | 2019   | 2020   | 2021   |
|----|--------|--------|--------|--------|--------|--------|--------|--------|--------|
| 1  |        |        |        |        |        |        |        |        |        |
| 2  |        |        |        |        |        |        |        |        |        |
| 3  |        |        |        |        |        |        |        |        |        |
| 4  |        |        |        |        |        |        |        |        |        |
| 5  | 6      | 2      | 2      | 2      | 7      | 8      | 8      | 9      | 9      |
| 6  | 1      | 2      | 1      | 2      | 3      | 1      | 1      | 1      | 1      |
| 7  | 5      | 5      | 2      | 4      | 6      | 4      | 4      | 4      | 4      |
| 8  | 11     | 8      | 5      | 7      | 7      | 6      | 6      | 6      | 6      |
| 9  | 8      | 8      | 9      | 10     | 10     | 9      | 9      | 9      | 8      |
| 10 | 19     | 14     | 26     | 20     | 14     | 17     | 16     | 15     | 13     |
| 11 | 48     | 37     | 45     | 42     | 39     | 43     | 43     | 42     | 42     |
| 12 | 84     | 59     | 79     | 80     | 73     | 56     | 53     | 51     | 48     |
| 13 | 150    | 169    | 134    | 163    | 131    | 106    | 101    | 97     | 95     |
| 14 | 287    | 286    | 312    | 268    | 249    | 244    | 227    | 214    | 198    |
| 15 | 502    | 462    | 482    | 478    | 513    | 492    | 480    | 464    | 453    |
| 16 | 688    | 719    | 701    | 702    | 720    | 710    | 709    | 710    | 703    |
| 17 | 1,037  | 959    | 932    | 986    | 1,021  | 977    | 980    | 983    | 986    |
| 18 | 1,546  | 1,504  | 1,576  | 1,538  | 1,513  | 1,459  | 1,424  | 1,405  | 1,398  |
| 19 | 2,085  | 1,945  | 2,100  | 2,070  | 2,119  | 2,247  | 2,284  | 2,327  | 2,354  |
| 20 | 2,878  | 2,810  | 2,871  | 2,843  | 2,930  | 2,827  | 2,839  | 2,837  | 2,879  |
| 21 | 3,721  | 3,648  | 3,771  | 3,612  | 3,736  | 3,755  | 3,761  | 3,758  | 3,716  |
| 22 | 4,020  | 3,945  | 4,184  | 4,123  | 4,316  | 4,230  | 4,268  | 4,302  | 4,331  |
| 23 | 3,023  | 3,030  | 3,387  | 3,037  | 3,311  | 3,127  | 3,179  | 3,244  | 3,313  |
| 24 | 1,066  | 1,025  | 1,210  | 1,213  | 1,316  | 1,240  | 1,274  | 1,268  | 1,284  |
| 25 | 226    | 239    | 241    | 228    | 205    | 183    | 175    | 204    | 218    |
| 26 |        |        |        |        |        |        |        |        |        |
| 27 | 6      | 5      | 3      | 3      | 4      | 4      | 3      | 3      | 3      |
| 28 | 3      | 6      | 4      | 7      | 3      | 5      | 5      | 5      | 6      |
| 29 | 8      | 4      | 7      | 3      | 5      | 4      | 4      | 4      | 4      |
| 30 | 7      | 6      | 9      | 7      | 10     | 10     | 10     | 10     | 10     |
| 31 | 8      | 10     | 10     | 12     | 7      | 7      | 6      | 5      | 5      |
| 32 | 22     | 17     | 28     | 36     | 20     | 17     | 17     | 16     | 15     |
| 33 | 52     | 36     | 59     | 44     | 54     | 45     | 44     | 44     | 43     |
| 34 | 77     | 91     | 82     | 67     | 98     | 89     | 87     | 85     | 83     |
| 35 | 217    | 203    | 188    | 191    | 163    | 140    | 134    | 129    | 125    |
| 36 | 386    | 367    | 371    | 389    | 390    | 312    | 295    | 279    | 262    |
| 37 | 648    | 603    | 639    | 655    | 602    | 533    | 507    | 476    | 453    |
| 38 | 984    | 947    | 953    | 1,022  | 945    | 943    | 928    | 915    | 891    |
| 39 | 1,392  | 1,379  | 1,435  | 1,398  | 1,413  | 1,365  | 1,362  | 1,365  | 1,363  |
| 40 | 2,101  | 2,131  | 2,252  | 2,237  | 2,085  | 2,001  | 1,937  | 1,890  | 1,869  |
| 41 | 2,582  | 2,526  | 2,679  | 2,582  | 2,726  | 2,892  | 2,922  | 2,968  | 2,976  |
| 42 | 3,120  | 3,095  | 3,187  | 3,005  | 3,256  | 3,071  | 3,103  | 3,114  | 3,190  |
| 43 | 3,412  | 3,306  | 3,482  | 3,499  | 3,594  | 3,491  | 3,527  | 3,539  | 3,513  |
| 44 | 2,688  | 2,803  | 2,898  | 2,841  | 3,054  | 3,013  | 3,072  | 3,145  | 3,197  |
| 45 | 1,431  | 1,462  | 1,654  | 1,572  | 1,639  | 1,543  | 1,584  | 1,625  | 1,684  |
| 46 | 297    | 307    | 354    | 398    | 454    | 425    | 464    | 489    | 516    |
| 47 | 33     | 41     | 37     | 56     | 55     | 36     | 35     | 43     | 50     |
| 48 |        |        |        |        |        |        |        |        |        |
| 49 | 40,885 | 40,221 | 42,401 | 41,452 | 42,816 | 41,683 | 41,887 | 42,098 | 42,315 |
| 50 | 74.74% | 74.16% | 73.65% | 73.08% | 73.99% | 74.23% | 74.28% | 74.33% | 74.39% |
| 51 |        |        |        |        |        |        |        |        |        |
| 52 |        |        |        |        |        |        |        |        |        |
| 53 |        |        |        |        |        |        |        |        |        |
| 54 |        |        |        |        |        |        |        |        |        |
| 55 |        |        |        |        |        |        |        |        |        |
| 56 |        |        |        |        |        |        |        |        |        |
| 57 |        |        |        |        |        |        |        |        |        |
| 58 |        |        |        |        |        |        |        |        |        |
| 59 |        |        |        |        |        |        |        |        |        |
| 60 |        |        |        |        |        |        |        |        |        |

1  
2  
3  
4  
5  
6  
7  
8  
9  
10  
11  
12  
13  
14  
15  
16  
17  
18  
19  
20  
21  
22  
23  
24  
25  
26  
27  
28  
29  
30  
31  
32  
33  
34  
35  
36  
37  
38  
39  
40  
41  
42  
43  
44  
45  
46  
47  
48  
49  
50  
51  
52  
53  
54  
55  
56  
57  
58  
59  
60

|        |        |        |        |        |        |        | Projected |        |  |
|--------|--------|--------|--------|--------|--------|--------|-----------|--------|--|
| 2022   | 2023   | 2024   | 2025   | 2026   | 2027   | 2028   | 2029      | 2030   |  |
| 9      | 9      | 10     | 10     | 10     | 10     | 10     | 10        | 10     |  |
| 1      | 1      | 1      | 1      | 1      | 1      | 1      | 1         | 1      |  |
| 3      | 3      | 3      | 3      | 3      | 2      | 2      | 2         | 2      |  |
| 6      | 6      | 6      | 6      | 7      | 6      | 7      | 6         | 7      |  |
| 7      | 7      | 6      | 6      | 6      | 5      | 5      | 5         | 5      |  |
| 12     | 11     | 10     | 9      | 8      | 6      | 6      | 5         | 4      |  |
| 41     | 40     | 39     | 38     | 36     | 34     | 32     | 30        | 28     |  |
| 45     | 42     | 40     | 37     | 34     | 32     | 28     | 25        | 22     |  |
| 94     | 92     | 89     | 85     | 81     | 77     | 73     | 70        | 66     |  |
| 182    | 172    | 166    | 161    | 158    | 158    | 157    | 152       | 148    |  |
| 439    | 420    | 396    | 379    | 357    | 336    | 322    | 318       | 316    |  |
| 692    | 677    | 660    | 638    | 623    | 604    | 577    | 547       | 521    |  |
| 988    | 990    | 989    | 991    | 980    | 966    | 946    | 923       | 892    |  |
| 1,404  | 1,411  | 1,424  | 1,442  | 1,460  | 1,470  | 1,481  | 1,487     | 1,496  |  |
| 2,223  | 2,156  | 2,116  | 2,100  | 2,100  | 2,120  | 2,141  | 2,170     | 2,196  |  |
| 3,046  | 3,127  | 3,185  | 3,252  | 3,299  | 3,125  | 3,039  | 2,993     | 2,978  |  |
| 3,702  | 3,723  | 3,751  | 3,763  | 3,828  | 4,070  | 4,196  | 4,290     | 4,394  |  |
| 4,354  | 4,416  | 4,457  | 4,486  | 4,466  | 4,482  | 4,548  | 4,619     | 4,667  |  |
| 3,403  | 3,462  | 3,524  | 3,590  | 3,664  | 3,734  | 3,829  | 3,910     | 3,980  |  |
| 1,292  | 1,303  | 1,329  | 1,361  | 1,401  | 1,450  | 1,481  | 1,521     | 1,567  |  |
| 228    | 229    | 234    | 237    | 245    | 248    | 252    | 263       | 274    |  |
| 2      | 2      | 2      | 2      | 1      | 1      | 1      | 1         | 0      |  |
| 6      | 6      | 7      | 7      | 7      | 8      | 8      | 9         | 9      |  |
| 3      | 3      | 3      | 3      | 3      | 3      | 3      | 3         | 3      |  |
| 10     | 10     | 10     | 11     | 11     | 11     | 11     | 12        | 12     |  |
| 4      | 3      | 3      | 3      | 2      | 2      | 2      | 2         | 1      |  |
| 15     | 14     | 13     | 13     | 12     | 11     | 11     | 10        | 10     |  |
| 43     | 42     | 40     | 39     | 37     | 35     | 34     | 32        | 30     |  |
| 82     | 80     | 79     | 78     | 78     | 77     | 74     | 72        | 69     |  |
| 121    | 117    | 111    | 105    | 98     | 92     | 87     | 81        | 75     |  |
| 247    | 234    | 228    | 225    | 223    | 222    | 222    | 217       | 213    |  |
| 426    | 398    | 371    | 345    | 321    | 298    | 278    | 267       | 260    |  |
| 865    | 835    | 805    | 766    | 737    | 703    | 666    | 629       | 596    |  |
| 1,363  | 1,362  | 1,355  | 1,351  | 1,330  | 1,304  | 1,274  | 1,242     | 1,195  |  |
| 1,867  | 1,860  | 1,860  | 1,877  | 1,890  | 1,892  | 1,893  | 1,887     | 1,884  |  |
| 2,794  | 2,691  | 2,623  | 2,581  | 2,571  | 2,584  | 2,594  | 2,609     | 2,635  |  |
| 3,409  | 3,522  | 3,579  | 3,652  | 3,680  | 3,478  | 3,370  | 3,307     | 3,273  |  |
| 3,532  | 3,559  | 3,629  | 3,672  | 3,793  | 4,093  | 4,267  | 4,373     | 4,499  |  |
| 3,235  | 3,314  | 3,378  | 3,417  | 3,415  | 3,458  | 3,524  | 3,632     | 3,705  |  |
| 1,763  | 1,833  | 1,892  | 1,963  | 2,028  | 2,082  | 2,164  | 2,235     | 2,291  |  |
| 533    | 550    | 579    | 610    | 651    | 698    | 740    | 783       | 833    |  |
| 54     | 57     | 61     | 65     | 69     | 72     | 75     | 80        | 86     |  |
| 42,547 | 42,790 | 43,065 | 43,378 | 43,727 | 44,063 | 44,432 | 44,831    | 45,256 |  |
| 74.44% | 74.50% | 74.56% | 74.63% | 74.71% | 74.78% | 74.86% | 74.94%    | 75.04% |  |

|    | 2031   | 2032   | 2033   | 2034   | 2035   | 2036   | 2037   | 2038   | 2039   |
|----|--------|--------|--------|--------|--------|--------|--------|--------|--------|
| 1  |        |        |        |        |        |        |        |        |        |
| 2  |        |        |        |        |        |        |        |        |        |
| 3  |        |        |        |        |        |        |        |        |        |
| 4  | 10     | 10     | 11     | 11     | 11     | 11     | 11     | 11     | 11     |
| 5  | 1      | 1      | 1      | 1      | 1      | 1      | 1      | 1      | 1      |
| 6  | 2      | 2      | 2      | 2      | 2      | 2      | 2      | 2      | 1      |
| 7  | 7      | 6      | 6      | 6      | 7      | 6      | 6      | 7      | 7      |
| 8  | 5      | 4      | 4      | 4      | 4      | 3      | 3      | 3      | 3      |
| 9  | 3      | 2      | 2      | 1      | 0      | 0      | 0      | 0      | 0      |
| 10 | 27     | 24     | 23     | 21     | 20     | 19     | 18     | 18     | 17     |
| 11 | 19     | 15     | 12     | 10     | 7      | 4      | 2      | 0      | 0      |
| 12 | 63     | 60     | 55     | 51     | 47     | 42     | 37     | 33     | 29     |
| 13 | 143    | 138    | 134    | 131    | 126    | 122    | 119    | 114    | 109    |
| 14 | 317    | 324    | 329    | 328    | 326    | 324    | 319    | 320    | 320    |
| 15 | 493    | 464    | 447    | 439    | 437    | 439    | 449    | 455    | 455    |
| 16 | 871    | 843    | 806    | 765    | 730    | 688    | 648    | 623    | 613    |
| 17 | 1,489  | 1,475  | 1,452  | 1,420  | 1,380  | 1,353  | 1,317  | 1,266  | 1,206  |
| 18 | 2,224  | 2,248  | 2,273  | 2,292  | 2,315  | 2,310  | 2,296  | 2,268  | 2,228  |
| 19 | 2,987  | 3,026  | 3,067  | 3,118  | 3,164  | 3,213  | 3,257  | 3,299  | 3,332  |
| 20 | 4,469  | 4,255  | 4,160  | 4,117  | 4,116  | 4,150  | 4,225  | 4,301  | 4,391  |
| 21 | 4,777  | 5,135  | 5,340  | 5,497  | 5,651  | 5,765  | 5,543  | 5,470  | 5,461  |
| 22 | 4,004  | 4,066  | 4,187  | 4,311  | 4,401  | 4,545  | 4,988  | 5,253  | 5,451  |
| 23 | 1,622  | 1,677  | 1,738  | 1,793  | 1,846  | 1,873  | 1,926  | 2,015  | 2,102  |
| 24 | 289    | 304    | 314    | 332    | 351    | 375    | 396    | 420    | 444    |
| 25 | 0      | 0      | 0      | 0      | 0      | 0      | 0      | 0      | 0      |
| 26 | 9      | 8      | 8      | 7      | 7      | 7      | 7      | 6      | 6      |
| 27 | 2      | 2      | 2      | 2      | 2      | 2      | 2      | 2      | 2      |
| 28 | 12     | 12     | 12     | 12     | 12     | 12     | 12     | 13     | 12     |
| 29 | 1      | 1      | 0      | 0      | 0      | 0      | 0      | 0      | 0      |
| 30 | 10     | 10     | 10     | 10     | 10     | 10     | 10     | 10     | 9      |
| 31 | 29     | 27     | 25     | 24     | 23     | 22     | 22     | 22     | 21     |
| 32 | 66     | 62     | 59     | 56     | 53     | 49     | 45     | 42     | 40     |
| 33 | 70     | 64     | 57     | 50     | 43     | 35     | 28     | 21     | 15     |
| 34 | 208    | 204    | 202    | 201    | 197    | 196    | 193    | 188    | 182    |
| 35 | 253    | 250    | 246    | 238    | 230    | 222    | 213    | 208    | 203    |
| 36 | 562    | 528    | 502    | 491    | 486    | 482    | 485    | 487    | 481    |
| 37 | 1,163  | 1,121  | 1,077  | 1,028  | 984    | 939    | 893    | 858    | 848    |
| 38 | 1,859  | 1,828  | 1,788  | 1,745  | 1,680  | 1,638  | 1,580  | 1,518  | 1,450  |
| 39 | 2,653  | 2,671  | 2,689  | 2,695  | 2,704  | 2,680  | 2,649  | 2,602  | 2,550  |
| 40 | 3,278  | 3,316  | 3,346  | 3,386  | 3,436  | 3,477  | 3,518  | 3,558  | 3,580  |
| 41 | 4,568  | 4,358  | 4,263  | 4,220  | 4,213  | 4,257  | 4,342  | 4,419  | 4,506  |
| 42 | 3,849  | 4,206  | 4,424  | 4,564  | 4,703  | 4,778  | 4,605  | 4,545  | 4,539  |
| 43 | 2,313  | 2,371  | 2,456  | 2,571  | 2,651  | 2,782  | 3,099  | 3,297  | 3,431  |
| 44 | 882    | 930    | 992    | 1,050  | 1,100  | 1,129  | 1,186  | 1,265  | 1,360  |
| 45 | 95     | 103    | 111    | 119    | 129    | 137    | 149    | 163    | 174    |
| 46 |        |        |        |        |        |        |        |        |        |
| 47 |        |        |        |        |        |        |        |        |        |
| 48 | 45,702 | 46,153 | 46,632 | 47,119 | 47,605 | 48,099 | 48,604 | 49,101 | 49,591 |
| 49 | 75.13% | 75.21% | 75.31% | 75.40% | 75.51% | 75.63% | 75.76% | 75.89% | 76.03% |
| 50 |        |        |        |        |        |        |        |        |        |
| 51 |        |        |        |        |        |        |        |        |        |
| 52 |        |        |        |        |        |        |        |        |        |
| 53 |        |        |        |        |        |        |        |        |        |
| 54 |        |        |        |        |        |        |        |        |        |
| 55 |        |        |        |        |        |        |        |        |        |
| 56 |        |        |        |        |        |        |        |        |        |
| 57 |        |        |        |        |        |        |        |        |        |
| 58 |        |        |        |        |        |        |        |        |        |
| 59 |        |        |        |        |        |        |        |        |        |
| 60 |        |        |        |        |        |        |        |        |        |

|    |             |
|----|-------------|
| 1  |             |
| 2  |             |
| 3  |             |
| 4  | <b>2040</b> |
| 5  | 12          |
| 6  | 1           |
| 7  | 1           |
| 8  | 7           |
| 9  | 2           |
| 10 | 0           |
| 11 | 16          |
| 12 | 0           |
| 13 | 25          |
| 14 | 103         |
| 15 | 319         |
| 16 | 454         |
| 17 | 610         |
| 18 | 1,156       |
| 19 | 2,171       |
| 20 | 3,372       |
| 21 | 4,474       |
| 22 | 5,505       |
| 23 | 5,619       |
| 24 | 2,168       |
| 25 | 467         |
| 26 | 0           |
| 27 | 6           |
| 28 | 2           |
| 29 | 12          |
| 30 | 0           |
| 31 | 9           |
| 32 | 21          |
| 33 | 38          |
| 34 | 9           |
| 35 | 175         |
| 36 | 197         |
| 37 | 475         |
| 38 | 850         |
| 39 | 1,390       |
| 40 | 2,470       |
| 41 | 3,609       |
| 42 | 4,606       |
| 43 | 4,569       |
| 44 | 3,549       |
| 45 | 1,429       |
| 46 | 185         |
| 47 |             |
| 48 |             |
| 49 | 50,084      |
| 50 | 76.17%      |
| 51 |             |
| 52 |             |
| 53 |             |
| 54 |             |
| 55 |             |
| 56 |             |
| 57 |             |
| 58 |             |
| 59 |             |
| 60 |             |

For peer review only



1  
2  
3  
4  
5  
6  
7  
8  
9  
10  
11  
12  
13  
14  
15  
16  
17  
18  
19  
20  
21  
22  
23  
24  
25  
26  
27  
28  
29  
30  
31  
32  
33  
34  
35  
36  
37  
38  
39  
40  
41  
42  
43  
44  
45  
46  
47  
48  
49  
50  
51  
52  
53  
54  
55  
56  
57  
58  
59  
60

|                                 | Baseline      |               |               |               |               |               |
|---------------------------------|---------------|---------------|---------------|---------------|---------------|---------------|
| Group                           | 2007          | 2008          | 2009          | 2010          | 2011          | 2012          |
| Females 0 - 4                   | 17            | 10            | 13            | 10            | 11            | 14            |
| Females 5 - 9                   | 6             | 7             | 5             | 4             | 6             | 5             |
| Females 10 - 14                 | 7             | 9             | 7             | 7             | 8             | 2             |
| Females 15 - 19                 | 12            | 16            | 11            | 16            | 15            | 5             |
| Females 20 - 24                 | 20            | 18            | 17            | 16            | 18            | 13            |
| Females 25 - 29                 | 28            | 19            | 29            | 23            | 37            | 33            |
| Females 30 - 34                 | 54            | 52            | 53            | 58            | 46            | 53            |
| Females 35 - 39                 | 125           | 125           | 106           | 102           | 109           | 80            |
| Females 40 - 44                 | 216           | 212           | 230           | 217           | 182           | 216           |
| Females 45 - 49                 | 412           | 353           | 352           | 339           | 369           | 327           |
| Females 50 - 54                 | 550           | 539           | 565           | 542           | 574           | 562           |
| Females 55 - 59                 | 800           | 831           | 769           | 759           | 754           | 769           |
| Females 60 - 64                 | 1,288         | 1,278         | 1,284         | 1,297         | 1,244         | 1,180         |
| Females 65 - 69                 | 1,820         | 1,713         | 1,659         | 1,691         | 1,629         | 1,705         |
| Females 70 - 74                 | 2,537         | 2,510         | 2,433         | 2,427         | 2,334         | 2,413         |
| Females 75 - 79                 | 3,590         | 3,790         | 3,466         | 3,434         | 3,349         | 3,474         |
| Females 80 - 84                 | 4,811         | 4,735         | 4,494         | 4,543         | 4,345         | 4,685         |
| Females 85 - 89                 | 4,857         | 5,084         | 5,039         | 4,785         | 4,769         | 4,993         |
| Females 90 - 94                 | 3,307         | 3,175         | 3,067         | 3,260         | 3,396         | 3,788         |
| Females 95 - 99                 | 1,377         | 1,395         | 1,326         | 1,429         | 1,409         | 1,475         |
| Females 100+                    | 247           | 237           | 279           | 274           | 265           | 300           |
| Males 0 - 4                     | 19            | 16            | 8             | 13            | 12            | 14            |
| Males 5 - 9                     | 4             | 7             | 7             | 9             | 9             | 5             |
| Males 10 - 14                   | 10            | 6             | 3             | 2             | 9             | 5             |
| Males 15 - 19                   | 17            | 21            | 15            | 15            | 18            | 16            |
| Males 20 - 24                   | 35            | 27            | 20            | 25            | 23            | 12            |
| Males 25 - 29                   | 35            | 37            | 32            | 43            | 44            | 26            |
| Males 30 - 34                   | 82            | 58            | 57            | 61            | 66            | 76            |
| Males 35 - 39                   | 159           | 159           | 133           | 134           | 113           | 127           |
| Males 40 - 44                   | 324           | 267           | 307           | 275           | 296           | 218           |
| Males 45 - 49                   | 464           | 535           | 471           | 463           | 429           | 444           |
| Males 50 - 54                   | 834           | 784           | 786           | 810           | 681           | 704           |
| Males 55 - 59                   | 1,277         | 1,245         | 1,115         | 1,170         | 1,094         | 1,081         |
| Males 60 - 64                   | 1,893         | 1,849         | 1,820         | 1,840         | 1,775         | 1,699         |
| Males 65 - 69                   | 2,355         | 2,466         | 2,354         | 2,231         | 2,280         | 2,319         |
| Males 70 - 74                   | 3,299         | 3,184         | 3,045         | 3,010         | 3,091         | 2,963         |
| Males 75 - 79                   | 3,977         | 3,763         | 3,671         | 3,741         | 3,565         | 3,670         |
| Males 80 - 84                   | 3,996         | 3,923         | 3,874         | 3,992         | 3,979         | 3,896         |
| Males 85 - 89                   | 2,918         | 2,973         | 3,168         | 3,029         | 3,235         | 3,335         |
| Males 90 - 94                   | 1,337         | 1,263         | 1,177         | 1,433         | 1,467         | 1,665         |
| Males 95 - 99                   | 330           | 342           | 395           | 396           | 394           | 395           |
| Males 100+                      | 30            | 49            | 46            | 59            | 45            | 53            |
| <b>Palliative Care Deaths</b>   | <b>49,476</b> | <b>49,082</b> | <b>47,708</b> | <b>47,984</b> | <b>47,494</b> | <b>48,815</b> |
| <b>Percentage of All Deaths</b> | <b>88.38%</b> | <b>88.12%</b> | <b>88.59%</b> | <b>88.91%</b> | <b>88.51%</b> | <b>88.86%</b> |

1  
2  
3  
4  
5  
6  
7  
8  
9  
10  
11  
12  
13  
14  
15  
16  
17  
18  
19  
20  
21  
22  
23  
24  
25  
26  
27  
28  
29  
30  
31  
32  
33  
34  
35  
36  
37  
38  
39  
40  
41  
42  
43  
44  
45  
46  
47  
48  
49  
50  
51  
52  
53  
54  
55  
56  
57  
58  
59  
60

| 2013   | 2014   | 2015   | 2016   | 2017   | 2018   | 2019   | 2020   | 2021   |
|--------|--------|--------|--------|--------|--------|--------|--------|--------|
| 12     | 6      | 10     | 11     | 14     | 16     | 16     | 16     | 16     |
| 2      | 3      | 1      | 3      | 3      | 1      | 1      | 1      | 1      |
| 6      | 5      | 3      | 6      | 8      | 5      | 5      | 5      | 5      |
| 17     | 9      | 11     | 8      | 9      | 8      | 7      | 7      | 7      |
| 11     | 14     | 14     | 19     | 18     | 17     | 17     | 17     | 16     |
| 22     | 19     | 31     | 26     | 20     | 24     | 24     | 23     | 21     |
| 59     | 43     | 61     | 61     | 53     | 60     | 61     | 62     | 63     |
| 96     | 72     | 99     | 97     | 100    | 78     | 76     | 74     | 71     |
| 172    | 197    | 157    | 202    | 163    | 133    | 129    | 126    | 125    |
| 332    | 329    | 357    | 333    | 301    | 297    | 279    | 264    | 246    |
| 562    | 537    | 561    | 563    | 585    | 562    | 549    | 532    | 520    |
| 788    | 816    | 795    | 816    | 849    | 841    | 843    | 848    | 842    |
| 1,145  | 1,103  | 1,067  | 1,155  | 1,169  | 1,120  | 1,126  | 1,132  | 1,138  |
| 1,738  | 1,703  | 1,812  | 1,774  | 1,750  | 1,689  | 1,651  | 1,631  | 1,624  |
| 2,412  | 2,253  | 2,471  | 2,403  | 2,494  | 2,647  | 2,694  | 2,748  | 2,783  |
| 3,387  | 3,344  | 3,453  | 3,385  | 3,496  | 3,374  | 3,389  | 3,386  | 3,437  |
| 4,466  | 4,446  | 4,628  | 4,470  | 4,580  | 4,602  | 4,607  | 4,603  | 4,550  |
| 4,936  | 4,899  | 5,190  | 5,134  | 5,331  | 5,217  | 5,256  | 5,290  | 5,319  |
| 3,808  | 3,812  | 4,302  | 3,881  | 4,134  | 3,893  | 3,949  | 4,019  | 4,094  |
| 1,383  | 1,318  | 1,589  | 1,594  | 1,725  | 1,623  | 1,666  | 1,657  | 1,677  |
| 313    | 321    | 345    | 327    | 288    | 257    | 247    | 288    | 308    |
| 14     | 10     | 9      | 10     | 9      | 8      | 8      | 7      | 7      |
| 5      | 8      | 6      | 9      | 4      | 6      | 6      | 7      | 7      |
| 11     | 7      | 8      | 5      | 8      | 6      | 6      | 6      | 6      |
| 12     | 9      | 15     | 12     | 13     | 13     | 13     | 12     | 12     |
| 13     | 14     | 18     | 21     | 13     | 13     | 12     | 11     | 10     |
| 31     | 29     | 37     | 44     | 30     | 26     | 25     | 24     | 23     |
| 71     | 52     | 86     | 69     | 78     | 66     | 66     | 66     | 66     |
| 108    | 126    | 121    | 125    | 140    | 128    | 127    | 127    | 126    |
| 287    | 256    | 238    | 265    | 248    | 221    | 218    | 218    | 219    |
| 450    | 449    | 456    | 491    | 497    | 403    | 385    | 369    | 352    |
| 738    | 691    | 759    | 814    | 752    | 674    | 650    | 618    | 595    |
| 1,113  | 1,077  | 1,135  | 1,190  | 1,107  | 1,111  | 1,101  | 1,093  | 1,070  |
| 1,561  | 1,582  | 1,603  | 1,620  | 1,619  | 1,566  | 1,563  | 1,568  | 1,567  |
| 2,420  | 2,427  | 2,591  | 2,608  | 2,416  | 2,325  | 2,258  | 2,211  | 2,192  |
| 2,928  | 2,939  | 3,159  | 3,042  | 3,206  | 3,410  | 3,455  | 3,518  | 3,537  |
| 3,661  | 3,676  | 3,818  | 3,609  | 3,882  | 3,666  | 3,709  | 3,726  | 3,822  |
| 4,082  | 4,024  | 4,229  | 4,281  | 4,367  | 4,245  | 4,292  | 4,309  | 4,280  |
| 3,302  | 3,470  | 3,685  | 3,591  | 3,815  | 3,767  | 3,842  | 3,936  | 4,005  |
| 1,835  | 1,869  | 2,127  | 2,066  | 2,155  | 2,033  | 2,093  | 2,153  | 2,237  |
| 383    | 395    | 499    | 560    | 620    | 580    | 634    | 667    | 704    |
| 47     | 55     | 55     | 69     | 79     | 52     | 50     | 62     | 72     |
| 48,739 | 48,414 | 51,611 | 50,769 | 52,148 | 50,784 | 51,106 | 51,437 | 51,773 |
| 89.10% | 89.26% | 89.64% | 89.51% | 90.11% | 90.44% | 90.63% | 90.82% | 91.01% |

1  
2  
3  
4  
5  
6  
7  
8  
9  
10  
11  
12  
13  
14  
15  
16  
17  
18  
19  
20  
21  
22  
23  
24  
25  
26  
27  
28  
29  
30  
31  
32  
33  
34  
35  
36  
37  
38  
39  
40  
41  
42  
43  
44  
45  
46  
47  
48  
49  
50  
51  
52  
53  
54  
55  
56  
57  
58  
59  
60

## Projected

| 2022   | 2023   | 2024   | 2025   | 2026   | 2027   | 2028   | 2029   | 2030   |
|--------|--------|--------|--------|--------|--------|--------|--------|--------|
| 16     | 16     | 16     | 16     | 16     | 16     | 16     | 16     | 16     |
| 1      | 1      | 1      | 1      | 0      | 0      | 0      | 0      | 0      |
| 5      | 5      | 5      | 4      | 4      | 4      | 4      | 4      | 4      |
| 8      | 7      | 7      | 8      | 8      | 7      | 8      | 7      | 7      |
| 16     | 15     | 14     | 14     | 14     | 14     | 14     | 14     | 15     |
| 20     | 19     | 18     | 16     | 15     | 14     | 13     | 11     | 11     |
| 63     | 63     | 64     | 63     | 62     | 60     | 59     | 57     | 55     |
| 68     | 66     | 64     | 62     | 59     | 58     | 54     | 52     | 48     |
| 126    | 125    | 123    | 120    | 117    | 113    | 111    | 109    | 105    |
| 228    | 217    | 211    | 207    | 205    | 206    | 207    | 203    | 200    |
| 505    | 483    | 457    | 438    | 414    | 390    | 374    | 370    | 368    |
| 833    | 817    | 800    | 776    | 762    | 741    | 710    | 676    | 647    |
| 1,143  | 1,147  | 1,149  | 1,153  | 1,143  | 1,129  | 1,108  | 1,083  | 1,049  |
| 1,634  | 1,644  | 1,660  | 1,684  | 1,706  | 1,721  | 1,735  | 1,744  | 1,757  |
| 2,631  | 2,555  | 2,511  | 2,494  | 2,497  | 2,524  | 2,552  | 2,588  | 2,623  |
| 3,638  | 3,734  | 3,805  | 3,885  | 3,943  | 3,735  | 3,633  | 3,579  | 3,561  |
| 4,532  | 4,556  | 4,589  | 4,602  | 4,681  | 4,976  | 5,128  | 5,242  | 5,367  |
| 5,339  | 5,407  | 5,450  | 5,476  | 5,444  | 5,456  | 5,529  | 5,608  | 5,658  |
| 4,195  | 4,257  | 4,323  | 4,392  | 4,473  | 4,547  | 4,652  | 4,739  | 4,813  |
| 1,685  | 1,698  | 1,731  | 1,771  | 1,822  | 1,883  | 1,921  | 1,972  | 2,030  |
| 323    | 325    | 332    | 338    | 350    | 354    | 361    | 376    | 393    |
| 6      | 6      | 5      | 5      | 5      | 4      | 4      | 3      | 3      |
| 7      | 7      | 8      | 8      | 8      | 8      | 9      | 9      | 9      |
| 7      | 7      | 7      | 6      | 7      | 7      | 6      | 6      | 6      |
| 12     | 12     | 13     | 13     | 13     | 14     | 14     | 14     | 14     |
| 9      | 8      | 7      | 7      | 6      | 6      | 6      | 6      | 5      |
| 22     | 21     | 20     | 19     | 18     | 17     | 16     | 15     | 15     |
| 66     | 66     | 65     | 63     | 62     | 60     | 58     | 56     | 54     |
| 126    | 126    | 127    | 127    | 128    | 129    | 128    | 126    | 124    |
| 221    | 223    | 222    | 220    | 218    | 216    | 216    | 217    | 216    |
| 335    | 322    | 318    | 318    | 320    | 324    | 327    | 325    | 324    |
| 568    | 539    | 509    | 481    | 455    | 428    | 406    | 398    | 393    |
| 1,046  | 1,017  | 986    | 944    | 915    | 879    | 839    | 798    | 761    |
| 1,568  | 1,567  | 1,561  | 1,557  | 1,535  | 1,506  | 1,472  | 1,436  | 1,384  |
| 2,196  | 2,196  | 2,202  | 2,229  | 2,251  | 2,261  | 2,269  | 2,269  | 2,273  |
| 3,329  | 3,215  | 3,141  | 3,099  | 3,096  | 3,120  | 3,139  | 3,166  | 3,206  |
| 4,090  | 4,232  | 4,305  | 4,399  | 4,438  | 4,200  | 4,075  | 4,004  | 3,967  |
| 4,306  | 4,342  | 4,430  | 4,486  | 4,636  | 5,006  | 5,222  | 5,355  | 5,513  |
| 4,055  | 4,157  | 4,240  | 4,292  | 4,292  | 4,348  | 4,434  | 4,574  | 4,668  |
| 2,348  | 2,447  | 2,532  | 2,634  | 2,727  | 2,807  | 2,925  | 3,028  | 3,111  |
| 727    | 749    | 790    | 831    | 887    | 951    | 1,008  | 1,066  | 1,135  |
| 78     | 82     | 87     | 94     | 100    | 104    | 108    | 116    | 125    |
| 52,130 | 52,497 | 52,905 | 53,355 | 53,852 | 54,343 | 54,871 | 55,438 | 56,033 |
| 91.21% | 91.40% | 91.60% | 91.80% | 92.00% | 92.23% | 92.45% | 92.68% | 92.91% |

1  
2  
3  
4  
5  
6  
7  
8  
9  
10  
11  
12  
13  
14  
15  
16  
17  
18  
19  
20  
21  
22  
23  
24  
25  
26  
27  
28  
29  
30  
31  
32  
33  
34  
35  
36  
37  
38  
39  
40  
41  
42  
43  
44  
45  
46  
47  
48  
49  
50  
51  
52  
53  
54  
55  
56  
57  
58  
59  
60

|  | 2031   | 2032   | 2033   | 2034   | 2035   | 2036   | 2037   | 2038   | 2039   |
|--|--------|--------|--------|--------|--------|--------|--------|--------|--------|
|  | 16     | 16     | 16     | 16     | 17     | 16     | 16     | 16     | 16     |
|  | 0      | 0      | 0      | 0      | 0      | 0      | 0      | 0      | 0      |
|  | 3      | 4      | 3      | 3      | 3      | 3      | 3      | 3      | 3      |
|  | 8      | 7      | 7      | 7      | 7      | 7      | 7      | 7      | 7      |
|  | 15     | 15     | 14     | 14     | 14     | 14     | 13     | 13     | 13     |
|  | 10     | 10     | 9      | 9      | 8      | 8      | 7      | 7      | 6      |
|  | 54     | 50     | 49     | 47     | 47     | 47     | 47     | 48     | 48     |
|  | 44     | 41     | 37     | 34     | 31     | 27     | 24     | 21     | 19     |
|  | 103    | 102    | 98     | 94     | 90     | 85     | 79     | 75     | 70     |
|  | 195    | 190    | 187    | 185    | 180    | 178    | 176    | 170    | 165    |
|  | 370    | 379    | 385    | 385    | 383    | 381    | 376    | 378    | 378    |
|  | 614    | 580    | 561    | 554    | 553    | 558    | 573    | 583    | 585    |
|  | 1,026  | 995    | 954    | 907    | 867    | 819    | 773    | 745    | 734    |
|  | 1,750  | 1,736  | 1,711  | 1,676  | 1,630  | 1,599  | 1,559  | 1,500  | 1,431  |
|  | 2,659  | 2,691  | 2,723  | 2,749  | 2,779  | 2,776  | 2,763  | 2,732  | 2,687  |
|  | 3,573  | 3,620  | 3,670  | 3,731  | 3,787  | 3,846  | 3,899  | 3,950  | 3,991  |
|  | 5,457  | 5,194  | 5,077  | 5,023  | 5,021  | 5,061  | 5,150  | 5,242  | 5,349  |
|  | 5,783  | 6,208  | 6,447  | 6,628  | 6,804  | 6,933  | 6,656  | 6,560  | 6,540  |
|  | 4,831  | 4,896  | 5,030  | 5,167  | 5,264  | 5,425  | 5,940  | 6,243  | 6,465  |
|  | 2,099  | 2,168  | 2,245  | 2,315  | 2,380  | 2,415  | 2,481  | 2,593  | 2,703  |
|  | 414    | 436    | 451    | 478    | 507    | 541    | 573    | 608    | 643    |
|  | 3      | 2      | 2      | 2      | 2      | 1      | 1      | 1      | 1      |
|  | 9      | 8      | 8      | 7      | 7      | 6      | 7      | 6      | 6      |
|  | 6      | 6      | 6      | 6      | 6      | 6      | 6      | 6      | 6      |
|  | 14     | 14     | 14     | 13     | 14     | 14     | 14     | 14     | 14     |
|  | 5      | 5      | 5      | 4      | 4      | 4      | 3      | 3      | 3      |
|  | 14     | 15     | 14     | 14     | 14     | 14     | 14     | 14     | 14     |
|  | 52     | 49     | 47     | 46     | 45     | 44     | 45     | 45     | 45     |
|  | 120    | 116    | 113    | 109    | 105    | 100    | 95     | 91     | 89     |
|  | 217    | 217    | 213    | 209    | 204    | 196    | 189    | 182    | 174    |
|  | 322    | 321    | 323    | 326    | 326    | 329    | 330    | 327    | 323    |
|  | 391    | 393    | 395    | 390    | 385    | 380    | 374    | 374    | 374    |
|  | 723    | 684    | 655    | 646    | 643    | 643    | 652    | 661    | 657    |
|  | 1,347  | 1,300  | 1,249  | 1,194  | 1,144  | 1,092  | 1,040  | 999    | 989    |
|  | 2,250  | 2,219  | 2,177  | 2,131  | 2,059  | 2,014  | 1,949  | 1,878  | 1,800  |
|  | 3,236  | 3,267  | 3,297  | 3,313  | 3,333  | 3,312  | 3,283  | 3,232  | 3,177  |
|  | 3,978  | 4,029  | 4,072  | 4,125  | 4,192  | 4,247  | 4,303  | 4,357  | 4,390  |
|  | 5,601  | 5,347  | 5,234  | 5,184  | 5,179  | 5,237  | 5,345  | 5,443  | 5,553  |
|  | 4,853  | 5,306  | 5,585  | 5,767  | 5,946  | 6,044  | 5,829  | 5,757  | 5,753  |
|  | 3,149  | 3,235  | 3,359  | 3,525  | 3,643  | 3,832  | 4,280  | 4,563  | 4,759  |
|  | 1,201  | 1,266  | 1,350  | 1,428  | 1,497  | 1,536  | 1,613  | 1,719  | 1,849  |
|  | 137    | 150    | 160    | 172    | 187    | 199    | 216    | 238    | 253    |
|  | 56,653 | 57,288 | 57,956 | 58,636 | 59,309 | 59,989 | 60,705 | 61,405 | 62,084 |
|  | 93.13% | 93.36% | 93.59% | 93.83% | 94.08% | 94.33% | 94.63% | 94.91% | 95.18% |

|    |             |
|----|-------------|
| 1  |             |
| 2  |             |
| 3  |             |
| 4  | <b>2040</b> |
| 5  | 17          |
| 6  | 0           |
| 7  | 3           |
| 8  | 7           |
| 9  | 13          |
| 10 | 5           |
| 11 | 48          |
| 12 | 16          |
| 13 | 65          |
| 14 | 159         |
| 15 | 378         |
| 16 | 586         |
| 17 | 732         |
| 18 | 1,373       |
| 19 | 2,621       |
| 20 | 4,039       |
| 21 | 5,449       |
| 22 | 6,584       |
| 23 | 6,651       |
| 24 | 2,785       |
| 25 | 678         |
| 26 | 0           |
| 27 | 6           |
| 28 | 6           |
| 29 | 14          |
| 30 | 3           |
| 31 | 13          |
| 32 | 45          |
| 33 | 87          |
| 34 | 168         |
| 35 | 317         |
| 36 | 373         |
| 37 | 655         |
| 38 | 992         |
| 39 | 1,731       |
| 40 | 3,085       |
| 41 | 4,431       |
| 42 | 5,680       |
| 43 | 5,795       |
| 44 | 4,934       |
| 45 | 1,942       |
| 46 | 269         |
| 47 |             |
| 48 |             |
| 49 | 62,757      |
| 50 | 95.44%      |
| 51 |             |
| 52 |             |
| 53 |             |
| 54 |             |
| 55 |             |
| 56 |             |
| 57 |             |
| 58 |             |
| 59 |             |
| 60 |             |

For peer review only

1  
2  
3  
4  
5  
6  
7  
8  
9  
10  
11  
12  
13  
14  
15  
16  
17  
18  
19  
20  
21  
22  
23  
24  
25  
26  
27  
28  
29  
30  
31  
32  
33  
34  
35  
36  
37  
38  
39  
40  
41  
42  
43  
44  
45  
46  
47  
48  
49  
50  
51  
52  
53  
54  
55  
56  
57  
58  
59  
60

|                                 | Baseline      |               |               |               |               |               |
|---------------------------------|---------------|---------------|---------------|---------------|---------------|---------------|
| Group                           | 2007          | 2008          | 2009          | 2010          | 2011          | 2012          |
| Females 0 - 4                   | 3             | 1             | 3             | 1             | 6             | 3             |
| Females 5 - 9                   | 3             | 4             | 5             | 2             | 0             | 3             |
| Females 10 - 14                 | 3             | 5             | 4             | 1             | 4             | 0             |
| Females 15 - 19                 | 4             | 7             | 6             | 7             | 8             | 2             |
| Females 20 - 24                 | 8             | 8             | 4             | 8             | 6             | 6             |
| Females 25 - 29                 | 8             | 9             | 15            | 8             | 15            | 17            |
| Females 30 - 34                 | 32            | 16            | 25            | 17            | 22            | 21            |
| Females 35 - 39                 | 49            | 52            | 39            | 49            | 48            | 37            |
| Females 40 - 44                 | 105           | 104           | 113           | 116           | 90            | 105           |
| Females 45 - 49                 | 228           | 178           | 182           | 163           | 205           | 164           |
| Females 50 - 54                 | 273           | 266           | 295           | 293           | 293           | 326           |
| Females 55 - 59                 | 420           | 432           | 408           | 417           | 415           | 466           |
| Females 60 - 64                 | 685           | 640           | 683           | 674           | 685           | 664           |
| Females 65 - 69                 | 890           | 844           | 829           | 837           | 856           | 866           |
| Females 70 - 74                 | 1,048         | 1,077         | 1,057         | 1,077         | 1,020         | 1,079         |
| Females 75 - 79                 | 1,199         | 1,264         | 1,195         | 1,228         | 1,176         | 1,262         |
| Females 80 - 84                 | 1,157         | 1,203         | 1,170         | 1,210         | 1,179         | 1,303         |
| Females 85 - 89                 | 839           | 928           | 926           | 858           | 886           | 940           |
| Females 90 - 94                 | 406           | 381           | 368           | 426           | 417           | 488           |
| Females 95 - 99                 | 116           | 109           | 116           | 111           | 108           | 118           |
| Females 100+                    | 15            | 12            | 13            | 13            | 13            | 16            |
| Males 0 - 4                     | 9             | 1             | 2             | 6             | 3             | 7             |
| Males 5 - 9                     | 1             | 3             | 3             | 4             | 4             | 2             |
| Males 10 - 14                   | 7             | 5             | 2             | 0             | 3             | 1             |
| Males 15 - 19                   | 6             | 7             | 6             | 6             | 6             | 8             |
| Males 20 - 24                   | 11            | 12            | 4             | 8             | 9             | 2             |
| Males 25 - 29                   | 12            | 10            | 12            | 14            | 18            | 6             |
| Males 30 - 34                   | 15            | 10            | 13            | 19            | 18            | 20            |
| Males 35 - 39                   | 33            | 42            | 28            | 28            | 24            | 35            |
| Males 40 - 44                   | 66            | 69            | 76            | 52            | 80            | 64            |
| Males 45 - 49                   | 126           | 166           | 140           | 132           | 130           | 122           |
| Males 50 - 54                   | 284           | 267           | 277           | 286           | 236           | 258           |
| Males 55 - 59                   | 505           | 511           | 498           | 468           | 460           | 441           |
| Males 60 - 64                   | 821           | 808           | 788           | 825           | 776           | 781           |
| Males 65 - 69                   | 983           | 1,058         | 1,042         | 991           | 1,022         | 1,054         |
| Males 70 - 74                   | 1,333         | 1,312         | 1,299         | 1,244         | 1,352         | 1,313         |
| Males 75 - 79                   | 1,418         | 1,270         | 1,396         | 1,404         | 1,406         | 1,394         |
| Males 80 - 84                   | 1,186         | 1,165         | 1,138         | 1,262         | 1,284         | 1,237         |
| Males 85 - 89                   | 661           | 707           | 724           | 740           | 806           | 846           |
| Males 90 - 94                   | 253           | 250           | 222           | 276           | 299           | 338           |
| Males 95 - 99                   | 48            | 54            | 59            | 42            | 65            | 45            |
| Males 100+                      | 5             | 2             | 2             | 0             | 4             | 4             |
| <b>Cancer Deaths</b>            | <b>15,274</b> | <b>15,269</b> | <b>15,187</b> | <b>15,323</b> | <b>15,457</b> | <b>15,864</b> |
| <b>Percentage of All Deaths</b> | <b>27.28%</b> | <b>27.41%</b> | <b>28.20%</b> | <b>28.39%</b> | <b>28.80%</b> | <b>28.88%</b> |

|    | 2013   | 2014   | 2015   | 2016   | 2017   | 2018   | 2019   | 2020   | 2021   |
|----|--------|--------|--------|--------|--------|--------|--------|--------|--------|
| 1  |        |        |        |        |        |        |        |        |        |
| 2  |        |        |        |        |        |        |        |        |        |
| 3  |        |        |        |        |        |        |        |        |        |
| 4  |        |        |        |        |        |        |        |        |        |
| 5  | 4      | 2      | 2      | 1      | 5      | 6      | 6      | 6      | 7      |
| 6  | 1      | 2      | 1      | 1      | 3      | 2      | 2      | 2      | 2      |
| 7  | 2      | 4      | 1      | 4      | 4      | 3      | 3      | 3      | 3      |
| 8  | 9      | 6      | 3      | 4      | 5      | 4      | 4      | 4      | 5      |
| 9  | 4      | 5      | 7      | 7      | 6      | 6      | 6      | 5      | 5      |
| 10 | 9      | 10     | 19     | 13     | 8      | 10     | 10     | 10     | 10     |
| 11 | 30     | 20     | 32     | 23     | 24     | 26     | 26     | 25     | 25     |
| 12 | 49     | 34     | 36     | 49     | 44     | 35     | 34     | 34     | 33     |
| 13 | 84     | 99     | 66     | 95     | 63     | 50     | 47     | 44     | 42     |
| 14 | 168    | 166    | 182    | 153    | 149    | 145    | 134    | 125    | 115    |
| 15 | 310    | 298    | 304    | 288    | 322    | 313    | 308    | 301    | 297    |
| 16 | 434    | 443    | 421    | 435    | 438    | 433    | 433    | 435    | 432    |
| 17 | 644    | 592    | 554    | 555    | 566    | 537    | 535    | 532    | 529    |
| 18 | 919    | 868    | 913    | 863    | 878    | 850    | 832    | 824    | 823    |
| 19 | 1,077  | 1,081  | 1,096  | 1,045  | 1,091  | 1,164  | 1,191  | 1,221  | 1,244  |
| 20 | 1,238  | 1,248  | 1,222  | 1,225  | 1,323  | 1,292  | 1,312  | 1,326  | 1,361  |
| 21 | 1,208  | 1,196  | 1,202  | 1,198  | 1,233  | 1,252  | 1,266  | 1,278  | 1,276  |
| 22 | 942    | 990    | 980    | 989    | 963    | 946    | 958    | 968    | 977    |
| 23 | 492    | 504    | 519    | 489    | 514    | 485    | 492    | 502    | 511    |
| 24 | 106    | 103    | 134    | 142    | 149    | 141    | 145    | 144    | 146    |
| 25 | 18     | 23     | 21     | 19     | 14     | 12     | 11     | 13     | 14     |
| 26 |        |        |        |        |        |        |        |        |        |
| 27 | 6      | 4      | 2      | 2      | 2      | 2      | 1      | 1      | 0      |
| 28 | 2      | 6      | 3      | 6      | 2      | 3      | 3      | 3      | 4      |
| 29 | 2      | 2      | 6      | 1      | 4      | 3      | 3      | 3      | 3      |
| 30 | 6      | 5      | 5      | 5      | 5      | 5      | 5      | 5      | 5      |
| 31 | 4      | 4      | 4      | 8      | 3      | 3      | 2      | 2      | 2      |
| 32 | 12     | 5      | 19     | 13     | 8      | 7      | 6      | 6      | 5      |
| 33 | 16     | 14     | 23     | 21     | 18     | 15     | 16     | 16     | 17     |
| 34 | 22     | 29     | 25     | 21     | 31     | 29     | 29     | 29     | 29     |
| 35 | 65     | 64     | 64     | 70     | 57     | 51     | 51     | 52     | 53     |
| 36 | 141    | 138    | 145    | 168    | 132    | 107    | 102    | 97     | 93     |
| 37 | 264    | 248    | 288    | 268    | 242    | 216    | 206    | 195    | 187    |
| 38 | 474    | 462    | 469    | 448    | 413    | 412    | 406    | 400    | 389    |
| 39 | 724    | 745    | 730    | 726    | 679    | 654    | 651    | 651    | 648    |
| 40 | 1,101  | 1,125  | 1,209  | 1,192  | 1,066  | 1,032  | 1,007  | 991    | 988    |
| 41 | 1,298  | 1,307  | 1,334  | 1,272  | 1,389  | 1,487  | 1,517  | 1,554  | 1,573  |
| 42 | 1,368  | 1,411  | 1,425  | 1,351  | 1,436  | 1,361  | 1,382  | 1,393  | 1,434  |
| 43 | 1,327  | 1,256  | 1,273  | 1,352  | 1,427  | 1,399  | 1,428  | 1,446  | 1,449  |
| 44 | 874    | 922    | 845    | 898    | 957    | 954    | 982    | 1,016  | 1,043  |
| 45 | 353    | 342    | 442    | 396    | 421    | 398    | 411    | 424    | 442    |
| 46 | 47     | 51     | 63     | 77     | 104    | 98     | 109    | 116    | 124    |
| 47 | 4      | 6      | 4      | 6      | 5      | 3      | 2      | 2      | 1      |
| 48 |        |        |        |        |        |        |        |        |        |
| 49 | 15,858 | 15,840 | 16,093 | 15,899 | 16,203 | 15,949 | 16,075 | 16,206 | 16,343 |
| 50 | 28.99% | 29.20% | 27.95% | 28.03% | 28.00% | 28.40% | 28.51% | 28.61% | 28.73% |
| 51 |        |        |        |        |        |        |        |        |        |
| 52 |        |        |        |        |        |        |        |        |        |
| 53 |        |        |        |        |        |        |        |        |        |
| 54 |        |        |        |        |        |        |        |        |        |
| 55 |        |        |        |        |        |        |        |        |        |
| 56 |        |        |        |        |        |        |        |        |        |
| 57 |        |        |        |        |        |        |        |        |        |
| 58 |        |        |        |        |        |        |        |        |        |
| 59 |        |        |        |        |        |        |        |        |        |
| 60 |        |        |        |        |        |        |        |        |        |

1  
2  
3  
4  
5  
6  
7  
8  
9  
10  
11  
12  
13  
14  
15  
16  
17  
18  
19  
20  
21  
22  
23  
24  
25  
26  
27  
28  
29  
30  
31  
32  
33  
34  
35  
36  
37  
38  
39  
40  
41  
42  
43  
44  
45  
46  
47  
48  
49  
50  
51  
52  
53  
54  
55  
56  
57  
58  
59  
60

|        |        |        |        |        |        |        | Projected |        |  |
|--------|--------|--------|--------|--------|--------|--------|-----------|--------|--|
| 2022   | 2023   | 2024   | 2025   | 2026   | 2027   | 2028   | 2029      | 2030   |  |
| 7      | 7      | 7      | 7      | 7      | 7      | 8      | 8         | 8      |  |
| 2      | 2      | 2      | 2      | 2      | 2      | 2      | 2         | 2      |  |
| 3      | 3      | 3      | 2      | 2      | 2      | 2      | 2         | 2      |  |
| 5      | 5      | 5      | 5      | 5      | 5      | 6      | 5         | 6      |  |
| 5      | 4      | 4      | 4      | 4      | 4      | 4      | 4         | 4      |  |
| 10     | 10     | 9      | 9      | 9      | 9      | 8      | 8         | 8      |  |
| 24     | 23     | 23     | 22     | 20     | 19     | 18     | 16        | 15     |  |
| 33     | 32     | 32     | 31     | 31     | 31     | 30     | 29        | 28     |  |
| 40     | 38     | 36     | 33     | 30     | 27     | 24     | 22        | 19     |  |
| 105    | 98     | 94     | 90     | 87     | 86     | 84     | 81        | 78     |  |
| 292    | 282    | 269    | 260    | 248    | 236    | 228    | 228       | 229    |  |
| 426    | 417    | 408    | 395    | 387    | 376    | 360    | 342       | 327    |  |
| 526    | 522    | 517    | 514    | 503    | 492    | 477    | 461       | 441    |  |
| 830    | 837    | 847    | 862    | 875    | 885    | 894    | 901       | 910    |  |
| 1,182  | 1,154  | 1,139  | 1,137  | 1,145  | 1,163  | 1,181  | 1,204     | 1,226  |  |
| 1,456  | 1,511  | 1,556  | 1,605  | 1,646  | 1,575  | 1,548  | 1,540     | 1,547  |  |
| 1,284  | 1,303  | 1,326  | 1,342  | 1,378  | 1,479  | 1,538  | 1,587     | 1,640  |  |
| 985    | 1,001  | 1,013  | 1,022  | 1,021  | 1,027  | 1,044  | 1,063     | 1,077  |  |
| 525    | 533    | 542    | 551    | 562    | 572    | 586    | 597       | 607    |  |
| 147    | 149    | 152    | 156    | 161    | 166    | 170    | 175       | 181    |  |
| 14     | 14     | 14     | 14     | 14     | 14     | 13     | 14        | 14     |  |
| 0      | 0      | 0      | 0      | 0      | 0      | 0      | 0         | 0      |  |
| 4      | 4      | 4      | 5      | 5      | 5      | 5      | 5         | 6      |  |
| 3      | 3      | 3      | 3      | 3      | 3      | 2      | 2         | 2      |  |
| 5      | 5      | 5      | 5      | 5      | 5      | 5      | 5         | 5      |  |
| 1      | 1      | 1      | 1      | 1      | 1      | 0      | 0         | 0      |  |
| 5      | 5      | 4      | 4      | 3      | 3      | 3      | 3         | 2      |  |
| 17     | 17     | 17     | 17     | 17     | 17     | 16     | 16        | 16     |  |
| 29     | 29     | 29     | 30     | 30     | 31     | 30     | 30        | 30     |  |
| 54     | 55     | 56     | 56     | 56     | 56     | 57     | 58        | 59     |  |
| 88     | 84     | 83     | 83     | 83     | 84     | 85     | 84        | 83     |  |
| 177    | 167    | 156    | 147    | 137    | 128    | 121    | 118       | 115    |  |
| 378    | 365    | 352    | 335    | 322    | 307    | 291    | 275       | 261    |  |
| 646    | 644    | 639    | 635    | 624    | 610    | 594    | 578       | 555    |  |
| 995    | 1,000  | 1,008  | 1,026  | 1,041  | 1,051  | 1,061  | 1,066     | 1,073  |  |
| 1,490  | 1,448  | 1,424  | 1,414  | 1,421  | 1,441  | 1,459  | 1,480     | 1,507  |  |
| 1,540  | 1,599  | 1,633  | 1,674  | 1,695  | 1,610  | 1,567  | 1,545     | 1,536  |  |
| 1,470  | 1,494  | 1,538  | 1,570  | 1,636  | 1,780  | 1,872  | 1,935     | 2,007  |  |
| 1,066  | 1,102  | 1,134  | 1,158  | 1,168  | 1,194  | 1,228  | 1,277     | 1,314  |  |
| 466    | 486    | 505    | 527    | 547    | 564    | 590    | 612       | 630    |  |
| 129    | 135    | 143    | 152    | 164    | 178    | 190    | 203       | 218    |  |
| 1      | 0      | 0      | 0      | 0      | 0      | 0      | 0         | 0      |  |
| 16,461 | 16,588 | 16,731 | 16,903 | 17,096 | 17,242 | 17,402 | 17,579    | 17,787 |  |
| 28.80% | 28.88% | 28.97% | 29.08% | 29.21% | 29.26% | 29.32% | 29.39%    | 29.49% |  |



|    | 2031   | 2032   | 2033   | 2034   | 2035   | 2036   | 2037   | 2038   | 2039   |
|----|--------|--------|--------|--------|--------|--------|--------|--------|--------|
| 1  |        |        |        |        |        |        |        |        |        |
| 2  |        |        |        |        |        |        |        |        |        |
| 3  |        |        |        |        |        |        |        |        |        |
| 4  | 8      | 8      | 8      | 8      | 8      | 8      | 8      | 8      | 9      |
| 5  | 2      | 2      | 2      | 2      | 2      | 2      | 2      | 2      | 2      |
| 6  | 2      | 2      | 2      | 2      | 2      | 2      | 2      | 2      | 2      |
| 7  | 6      | 5      | 6      | 6      | 6      | 6      | 6      | 6      | 6      |
| 8  | 4      | 4      | 3      | 3      | 3      | 3      | 3      | 3      | 3      |
| 9  | 8      | 8      | 8      | 9      | 8      | 9      | 9      | 8      | 8      |
| 10 | 14     | 12     | 11     | 10     | 10     | 9      | 8      | 8      | 7      |
| 11 | 27     | 25     | 24     | 23     | 21     | 20     | 19     | 17     | 17     |
| 12 | 16     | 14     | 11     | 8      | 5      | 2      | 0      | 0      | 0      |
| 13 | 74     | 70     | 67     | 64     | 60     | 57     | 54     | 50     | 47     |
| 14 | 232    | 240    | 246    | 248    | 249    | 250    | 249    | 252    | 254    |
| 15 | 309    | 292    | 282    | 278    | 277    | 279    | 286    | 290    | 291    |
| 16 | 427    | 409    | 387    | 364    | 343    | 320    | 298    | 284    | 276    |
| 17 | 909    | 903    | 892    | 876    | 854    | 840    | 821    | 792    | 757    |
| 18 | 1,248  | 1,270  | 1,291  | 1,309  | 1,329  | 1,334  | 1,334  | 1,324  | 1,308  |
| 19 | 1,567  | 1,604  | 1,641  | 1,684  | 1,725  | 1,768  | 1,809  | 1,849  | 1,885  |
| 20 | 1,682  | 1,615  | 1,593  | 1,590  | 1,602  | 1,629  | 1,672  | 1,715  | 1,765  |
| 21 | 1,105  | 1,191  | 1,241  | 1,281  | 1,320  | 1,350  | 1,300  | 1,286  | 1,287  |
| 22 | 610    | 619    | 637    | 655    | 668    | 689    | 755    | 794    | 823    |
| 23 | 187    | 194    | 201    | 208    | 214    | 217    | 224    | 234    | 245    |
| 24 | 14     | 15     | 15     | 15     | 16     | 16     | 17     | 17     | 18     |
| 25 |        |        |        |        |        |        |        |        |        |
| 26 | 0      | 0      | 0      | 0      | 0      | 0      | 0      | 0      | 0      |
| 27 | 6      | 5      | 5      | 4      | 5      | 4      | 4      | 4      | 4      |
| 28 | 2      | 2      | 2      | 2      | 2      | 2      | 2      | 2      | 2      |
| 29 | 5      | 5      | 5      | 5      | 6      | 6      | 6      | 6      | 6      |
| 30 | 0      | 0      | 0      | 0      | 0      | 0      | 0      | 0      | 0      |
| 31 | 2      | 2      | 2      | 2      | 2      | 2      | 1      | 1      | 1      |
| 32 | 15     | 15     | 14     | 14     | 14     | 14     | 15     | 15     | 15     |
| 33 | 29     | 28     | 28     | 27     | 26     | 25     | 24     | 23     | 23     |
| 34 | 60     | 60     | 60     | 60     | 59     | 58     | 56     | 55     | 53     |
| 35 | 83     | 82     | 83     | 83     | 83     | 83     | 84     | 83     | 81     |
| 36 | 114    | 113    | 112    | 110    | 108    | 105    | 103    | 101    | 100    |
| 37 | 246    | 231    | 220    | 215    | 212    | 211    | 212    | 213    | 210    |
| 38 | 538    | 517    | 495    | 471    | 450    | 428    | 406    | 389    | 384    |
| 39 | 1,067  | 1,058  | 1,043  | 1,026  | 996    | 979    | 952    | 922    | 888    |
| 40 | 1,531  | 1,555  | 1,578  | 1,595  | 1,614  | 1,613  | 1,608  | 1,592  | 1,573  |
| 41 | 1,546  | 1,571  | 1,593  | 1,619  | 1,651  | 1,678  | 1,706  | 1,733  | 1,752  |
| 42 | 2,055  | 1,977  | 1,949  | 1,945  | 1,957  | 1,994  | 2,049  | 2,102  | 2,159  |
| 43 | 1,377  | 1,518  | 1,611  | 1,676  | 1,742  | 1,785  | 1,735  | 1,726  | 1,738  |
| 44 | 640    | 659    | 686    | 722    | 748    | 789    | 883    | 944    | 987    |
| 45 | 232    | 247    | 266    | 283    | 299    | 309    | 328    | 352    | 381    |
| 46 | 0      | 0      | 0      | 0      | 0      | 0      | 0      | 0      | 0      |
| 47 |        |        |        |        |        |        |        |        |        |
| 48 |        |        |        |        |        |        |        |        |        |
| 49 | 17,998 | 18,146 | 18,320 | 18,502 | 18,698 | 18,894 | 19,047 | 19,206 | 19,366 |
| 50 | 29.59% | 29.57% | 29.59% | 29.61% | 29.66% | 29.71% | 29.69% | 29.68% | 29.69% |
| 51 |        |        |        |        |        |        |        |        |        |
| 52 |        |        |        |        |        |        |        |        |        |
| 53 |        |        |        |        |        |        |        |        |        |
| 54 |        |        |        |        |        |        |        |        |        |
| 55 |        |        |        |        |        |        |        |        |        |
| 56 |        |        |        |        |        |        |        |        |        |
| 57 |        |        |        |        |        |        |        |        |        |
| 58 |        |        |        |        |        |        |        |        |        |
| 59 |        |        |        |        |        |        |        |        |        |
| 60 |        |        |        |        |        |        |        |        |        |

|    |             |
|----|-------------|
| 1  |             |
| 2  |             |
| 3  |             |
| 4  | <b>2040</b> |
| 5  | 9           |
| 6  | 2           |
| 7  | 2           |
| 8  | 6           |
| 9  | 3           |
| 10 | 8           |
| 11 | 6           |
| 12 | 16          |
| 13 | 0           |
| 14 | 42          |
| 15 | 256         |
| 16 | 291         |
| 17 | 272         |
| 18 | 728         |
| 19 | 1,282       |
| 20 | 1,924       |
| 21 | 1,813       |
| 22 | 1,300       |
| 23 | 848         |
| 24 | 253         |
| 25 | 18          |
| 26 | 0           |
| 27 | 4           |
| 28 | 2           |
| 29 | 6           |
| 30 | 0           |
| 31 | 1           |
| 32 | 15          |
| 33 | 22          |
| 34 | 52          |
| 35 | 80          |
| 36 | 99          |
| 37 | 208         |
| 38 | 383         |
| 39 | 858         |
| 40 | 1,536       |
| 41 | 1,774       |
| 42 | 2,224       |
| 43 | 1,764       |
| 44 | 1,025       |
| 45 | 403         |
| 46 | 0           |
| 47 |             |
| 48 |             |
| 49 | 19,535      |
| 50 | 29.71%      |
| 51 |             |
| 52 |             |
| 53 |             |
| 54 |             |
| 55 |             |
| 56 |             |
| 57 |             |
| 58 |             |
| 59 |             |
| 60 |             |

For peer review only

1  
2  
3  
4  
5  
6  
7  
8  
9  
10  
11  
12  
13  
14  
15  
16  
17  
18  
19  
20  
21  
22  
23  
24  
25  
26  
27  
28  
29  
30  
31  
32  
33  
34  
35  
36  
37  
38  
39  
40  
41  
42  
43  
44  
45  
46  
47  
48  
49  
50  
51  
52  
53  
54  
55  
56  
57  
58  
59  
60

|                                 | Baseline |        |        |        |        |        |
|---------------------------------|----------|--------|--------|--------|--------|--------|
| Group                           | 2007     | 2008   | 2009   | 2010   | 2011   | 2012   |
| Females 0 - 4                   | 2        | 2      | 1      | 1      | 0      | 2      |
| Females 5 - 9                   | 1        | 1      | 0      | 0      | 2      | 0      |
| Females 10 - 14                 | 2        | 2      | 0      | 3      | 0      | 1      |
| Females 15 - 19                 | 3        | 2      | 3      | 0      | 2      | 1      |
| Females 20 - 24                 | 6        | 3      | 6      | 3      | 5      | 3      |
| Females 25 - 29                 | 13       | 4      | 4      | 5      | 7      | 7      |
| Females 30 - 34                 | 12       | 14     | 19     | 17     | 14     | 16     |
| Females 35 - 39                 | 41       | 41     | 39     | 30     | 39     | 23     |
| Females 40 - 44                 | 60       | 63     | 67     | 62     | 59     | 59     |
| Females 45 - 49                 | 99       | 99     | 95     | 97     | 103    | 85     |
| Females 50 - 54                 | 173      | 152    | 159    | 141    | 158    | 125    |
| Females 55 - 59                 | 232      | 249    | 222    | 199    | 193    | 168    |
| Females 60 - 64                 | 346      | 374    | 334    | 348    | 314    | 300    |
| Females 65 - 69                 | 540      | 505    | 471    | 504    | 428    | 500    |
| Females 70 - 74                 | 825      | 783    | 729    | 718    | 704    | 717    |
| Females 75 - 79                 | 1,175    | 1,223  | 1,111  | 1,020  | 1,050  | 1,040  |
| Females 80 - 84                 | 1,586    | 1,470  | 1,385  | 1,429  | 1,369  | 1,413  |
| Females 85 - 89                 | 1,552    | 1,543  | 1,488  | 1,380  | 1,339  | 1,456  |
| Females 90 - 94                 | 962      | 894    | 872    | 911    | 923    | 958    |
| Females 95 - 99                 | 355      | 393    | 365    | 376    | 373    | 328    |
| Females 100+                    | 62       | 52     | 60     | 66     | 58     | 69     |
| Males 0 - 4                     | 1        | 2      | 0      | 1      | 2      | 3      |
| Males 5 - 9                     | 0        | 1      | 2      | 2      | 0      | 1      |
| Males 10 - 14                   | 1        | 0      | 0      | 1      | 2      | 3      |
| Males 15 - 19                   | 3        | 2      | 3      | 1      | 4      | 3      |
| Males 20 - 24                   | 10       | 3      | 4      | 3      | 4      | 4      |
| Males 25 - 29                   | 10       | 13     | 7      | 19     | 12     | 11     |
| Males 30 - 34                   | 42       | 23     | 28     | 23     | 28     | 34     |
| Males 35 - 39                   | 84       | 75     | 68     | 72     | 59     | 47     |
| Males 40 - 44                   | 186      | 135    | 144    | 138    | 142    | 107    |
| Males 45 - 49                   | 231      | 263    | 230    | 236    | 203    | 227    |
| Males 50 - 54                   | 397      | 337    | 362    | 378    | 312    | 310    |
| Males 55 - 59                   | 582      | 534    | 415    | 473    | 438    | 444    |
| Males 60 - 64                   | 722      | 702    | 695    | 668    | 667    | 625    |
| Males 65 - 69                   | 926      | 923    | 837    | 775    | 767    | 825    |
| Males 70 - 74                   | 1,196    | 1,083  | 998    | 1,021  | 998    | 946    |
| Males 75 - 79                   | 1,398    | 1,317  | 1,210  | 1,207  | 1,142  | 1,196  |
| Males 80 - 84                   | 1,419    | 1,306  | 1,307  | 1,248  | 1,235  | 1,147  |
| Males 85 - 89                   | 1,028    | 1,025  | 1,078  | 977    | 1,035  | 1,077  |
| Males 90 - 94                   | 450      | 407    | 356    | 467    | 438    | 482    |
| Males 95 - 99                   | 99       | 95     | 139    | 110    | 108    | 115    |
| Males 100+                      | 12       | 15     | 12     | 16     | 12     | 10     |
| <b>Organ Failure Deaths</b>     | 16,844   | 16,130 | 15,325 | 15,146 | 14,748 | 14,888 |
| <b>Percentage of All Deaths</b> | 30.09%   | 28.96% | 28.46% | 28.07% | 27.48% | 27.10% |

1  
2  
3  
4  
5  
6  
7  
8  
9  
10  
11  
12  
13  
14  
15  
16  
17  
18  
19  
20  
21  
22  
23  
24  
25  
26  
27  
28  
29  
30  
31  
32  
33  
34  
35  
36  
37  
38  
39  
40  
41  
42  
43  
44  
45  
46  
47  
48  
49  
50  
51  
52  
53  
54  
55  
56  
57  
58  
59  
60

|  | 2013   | 2014   | 2015   | 2016   | 2017   | 2018   | 2019   | 2020   | 2021   |
|--|--------|--------|--------|--------|--------|--------|--------|--------|--------|
|  | 2      | 0      | 0      | 1      | 2      | 2      | 2      | 2      | 2      |
|  | 0      | 0      | 0      | 1      | 0      | 0      | 0      | 0      | 0      |
|  | 3      | 1      | 1      | 0      | 2      | 1      | 1      | 1      | 1      |
|  | 2      | 2      | 1      | 2      | 2      | 2      | 2      | 2      | 2      |
|  | 4      | 1      | 1      | 2      | 3      | 3      | 2      | 2      | 2      |
|  | 7      | 3      | 6      | 6      | 5      | 5      | 5      | 4      | 3      |
|  | 14     | 11     | 12     | 15     | 13     | 15     | 15     | 16     | 16     |
|  | 30     | 17     | 31     | 26     | 20     | 14     | 12     | 11     | 9      |
|  | 48     | 61     | 55     | 47     | 52     | 43     | 42     | 42     | 43     |
|  | 94     | 94     | 97     | 85     | 74     | 73     | 69     | 65     | 61     |
|  | 146    | 114    | 135    | 148    | 151    | 142    | 136    | 128    | 122    |
|  | 194    | 213    | 221    | 200    | 221    | 217    | 215    | 213    | 210    |
|  | 282    | 278    | 280    | 316    | 349    | 338    | 343    | 348    | 354    |
|  | 465    | 482    | 466    | 502    | 482    | 462    | 448    | 439    | 434    |
|  | 663    | 589    | 695    | 707    | 722    | 757    | 761    | 767    | 767    |
|  | 1,001  | 937    | 1,008  | 970    | 927    | 874    | 857    | 836    | 827    |
|  | 1,286  | 1,239  | 1,308  | 1,249  | 1,212  | 1,188  | 1,160  | 1,130  | 1,088  |
|  | 1,343  | 1,347  | 1,424  | 1,398  | 1,384  | 1,324  | 1,303  | 1,281  | 1,257  |
|  | 991    | 946    | 1,096  | 960    | 1,018  | 942    | 939    | 939    | 940    |
|  | 329    | 320    | 376    | 372    | 421    | 394    | 402    | 398    | 401    |
|  | 68     | 74     | 84     | 67     | 61     | 54     | 51     | 58     | 61     |
|  | 0      | 1      | 1      | 1      | 2      | 2      | 2      | 2      | 2      |
|  | 1      | 0      | 0      | 0      | 1      | 2      | 2      | 2      | 2      |
|  | 4      | 2      | 1      | 2      | 0      | 0      | 0      | 0      | 0      |
|  | 1      | 1      | 4      | 2      | 4      | 4      | 4      | 4      | 4      |
|  | 4      | 5      | 5      | 4      | 4      | 4      | 4      | 3      | 3      |
|  | 8      | 12     | 7      | 18     | 10     | 9      | 9      | 8      | 8      |
|  | 30     | 22     | 28     | 20     | 30     | 24     | 24     | 23     | 22     |
|  | 45     | 53     | 48     | 40     | 56     | 50     | 48     | 46     | 44     |
|  | 139    | 119    | 105    | 104    | 86     | 71     | 65     | 59     | 53     |
|  | 209    | 212    | 202    | 184    | 228    | 183    | 174    | 165    | 156    |
|  | 338    | 304    | 298    | 336    | 309    | 272    | 258    | 241    | 227    |
|  | 442    | 409    | 418    | 485    | 459    | 456    | 447    | 439    | 426    |
|  | 568    | 525    | 592    | 565    | 612    | 591    | 590    | 591    | 590    |
|  | 809    | 834    | 829    | 842    | 840    | 798    | 764    | 738    | 722    |
|  | 976    | 940    | 1,021  | 968    | 982    | 1,025  | 1,020  | 1,019  | 1,005  |
|  | 1,188  | 1,146  | 1,147  | 1,127  | 1,148  | 1,064  | 1,055  | 1,040  | 1,045  |
|  | 1,263  | 1,224  | 1,307  | 1,250  | 1,238  | 1,174  | 1,157  | 1,131  | 1,094  |
|  | 955    | 1,012  | 1,076  | 991    | 1,059  | 1,018  | 1,010  | 1,006  | 994    |
|  | 559    | 581    | 592    | 569    | 558    | 511    | 511    | 510    | 513    |
|  | 127    | 113    | 143    | 146    | 156    | 143    | 154    | 159    | 165    |
|  | 12     | 16     | 19     | 21     | 25     | 16     | 15     | 18     | 20     |
|  | 14,650 | 14,260 | 15,140 | 14,749 | 14,928 | 14,267 | 14,077 | 13,887 | 13,696 |
|  | 26.78% | 26.29% | 26.30% | 26.00% | 25.80% | 25.41% | 24.96% | 24.52% | 24.08% |

1  
2  
3  
4  
5  
6  
7  
8  
9  
10  
11  
12  
13  
14  
15  
16  
17  
18  
19  
20  
21  
22  
23  
24  
25  
26  
27  
28  
29  
30  
31  
32  
33  
34  
35  
36  
37  
38  
39  
40  
41  
42  
43  
44  
45  
46  
47  
48  
49  
50  
51  
52  
53  
54  
55  
56  
57  
58  
59  
60

## Projected

| 2022   | 2023   | 2024   | 2025   | 2026   | 2027   | 2028   | 2029   | 2030   |
|--------|--------|--------|--------|--------|--------|--------|--------|--------|
| 2      | 2      | 3      | 3      | 3      | 3      | 3      | 3      | 3      |
| 0      | 0      | 0      | 0      | 0      | 0      | 0      | 0      | 0      |
| 1      | 1      | 1      | 1      | 1      | 1      | 1      | 1      | 1      |
| 2      | 2      | 2      | 2      | 2      | 2      | 2      | 1      | 1      |
| 2      | 1      | 1      | 1      | 1      | 1      | 1      | 0      | 0      |
| 2      | 1      | 0      | 0      | 0      | 0      | 0      | 0      | 0      |
| 16     | 16     | 17     | 17     | 17     | 16     | 16     | 15     | 15     |
| 7      | 5      | 3      | 1      | 0      | 0      | 0      | 0      | 0      |
| 44     | 44     | 44     | 44     | 44     | 43     | 43     | 43     | 43     |
| 57     | 54     | 53     | 52     | 52     | 52     | 53     | 52     | 51     |
| 116    | 108    | 100    | 93     | 85     | 78     | 73     | 70     | 68     |
| 205    | 199    | 192    | 184    | 179    | 172    | 163    | 153    | 145    |
| 359    | 363    | 367    | 372    | 373    | 372    | 368    | 363    | 355    |
| 433    | 432    | 433    | 436    | 438    | 438    | 438    | 437    | 436    |
| 717    | 687    | 667    | 654    | 647    | 645    | 644    | 645    | 645    |
| 854    | 854    | 847    | 842    | 830    | 764    | 722    | 690    | 665    |
| 1,055  | 1,031  | 1,010  | 984    | 971    | 1,001  | 1,000  | 989    | 979    |
| 1,232  | 1,216  | 1,195  | 1,170  | 1,133  | 1,105  | 1,089  | 1,073  | 1,051  |
| 946    | 943    | 940    | 938    | 937    | 935    | 939    | 938    | 935    |
| 400    | 401    | 407    | 414    | 424    | 435    | 442    | 451    | 462    |
| 63     | 62     | 62     | 62     | 63     | 63     | 63     | 65     | 66     |
| 2      | 2      | 2      | 3      | 3      | 3      | 3      | 3      | 3      |
| 2      | 2      | 2      | 3      | 3      | 3      | 3      | 3      | 3      |
| 0      | 0      | 0      | 0      | 0      | 0      | 0      | 0      | 0      |
| 4      | 4      | 4      | 5      | 5      | 5      | 5      | 5      | 5      |
| 3      | 3      | 2      | 2      | 2      | 2      | 2      | 2      | 2      |
| 8      | 8      | 7      | 7      | 7      | 6      | 6      | 6      | 6      |
| 21     | 20     | 19     | 18     | 17     | 15     | 14     | 13     | 12     |
| 42     | 40     | 39     | 37     | 35     | 34     | 32     | 29     | 27     |
| 48     | 43     | 36     | 30     | 23     | 17     | 10     | 4      | 0      |
| 147    | 140    | 137    | 136    | 135    | 136    | 136    | 133    | 132    |
| 213    | 198    | 183    | 169    | 156    | 143    | 133    | 127    | 122    |
| 411    | 396    | 379    | 359    | 344    | 327    | 308    | 289    | 273    |
| 590    | 589    | 586    | 584    | 575    | 564    | 551    | 537    | 517    |
| 714    | 703    | 696    | 694    | 691    | 683    | 676    | 665    | 656    |
| 928    | 878    | 841    | 813    | 795    | 784    | 772    | 761    | 754    |
| 1,096  | 1,110  | 1,106  | 1,105  | 1,090  | 1,009  | 956    | 917    | 887    |
| 1,071  | 1,050  | 1,041  | 1,023  | 1,026  | 1,074  | 1,085  | 1,077  | 1,072  |
| 977    | 972    | 960    | 941    | 910    | 891    | 877    | 872    | 857    |
| 522    | 526    | 527    | 529    | 529    | 525    | 527    | 524    | 518    |
| 167    | 169    | 175    | 181    | 190    | 200    | 208    | 216    | 226    |
| 21     | 22     | 22     | 23     | 24     | 24     | 24     | 25     | 25     |
| 13,497 | 13,300 | 13,110 | 12,931 | 12,758 | 12,570 | 12,383 | 12,198 | 12,015 |
| 23.62% | 23.16% | 22.70% | 22.25% | 21.80% | 21.33% | 20.86% | 20.39% | 19.92% |

1  
2  
3  
4  
5  
6  
7  
8  
9  
10  
11  
12  
13  
14  
15  
16  
17  
18  
19  
20  
21  
22  
23  
24  
25  
26  
27  
28  
29  
30  
31  
32  
33  
34  
35  
36  
37  
38  
39  
40  
41  
42  
43  
44  
45  
46  
47  
48  
49  
50  
51  
52  
53  
54  
55  
56  
57  
58  
59  
60

|  | 2031   | 2032   | 2033   | 2034   | 2035   | 2036   | 2037   | 2038   | 2039   |
|--|--------|--------|--------|--------|--------|--------|--------|--------|--------|
|  | 3      | 3      | 3      | 3      | 3      | 3      | 3      | 3      | 3      |
|  | 0      | 0      | 0      | 0      | 0      | 0      | 0      | 0      | 0      |
|  | 1      | 1      | 1      | 1      | 1      | 1      | 1      | 1      | 0      |
|  | 1      | 1      | 1      | 1      | 1      | 1      | 1      | 1      | 1      |
|  | 0      | 0      | 0      | 0      | 0      | 0      | 0      | 0      | 0      |
|  | 0      | 0      | 0      | 0      | 0      | 0      | 0      | 0      | 0      |
|  | 15     | 14     | 14     | 13     | 14     | 14     | 14     | 14     | 14     |
|  | 0      | 0      | 0      | 0      | 0      | 0      | 0      | 0      | 0      |
|  | 43     | 43     | 42     | 42     | 41     | 40     | 38     | 37     | 35     |
|  | 50     | 49     | 48     | 48     | 47     | 47     | 46     | 45     | 44     |
|  | 66     | 65     | 64     | 62     | 59     | 57     | 54     | 52     | 50     |
|  | 136    | 127    | 121    | 118    | 116    | 116    | 117    | 118    | 117    |
|  | 350    | 343    | 332    | 318    | 307    | 292    | 279    | 271    | 269    |
|  | 431    | 424    | 414    | 402    | 388    | 377    | 365    | 348    | 329    |
|  | 645    | 644    | 643    | 640    | 638    | 629    | 617    | 602    | 583    |
|  | 646    | 633    | 620    | 609    | 596    | 583    | 568    | 552    | 535    |
|  | 962    | 883    | 832    | 792    | 761    | 736    | 718    | 698    | 680    |
|  | 1,043  | 1,086  | 1,092  | 1,087  | 1,079  | 1,062  | 984    | 935    | 898    |
|  | 920    | 914    | 921    | 927    | 925    | 934    | 1,001  | 1,031  | 1,044  |
|  | 475    | 488    | 503    | 516    | 528    | 533    | 544    | 566    | 587    |
|  | 69     | 71     | 72     | 75     | 79     | 82     | 86     | 89     | 93     |
|  | 3      | 3      | 3      | 3      | 3      | 3      | 3      | 3      | 3      |
|  | 3      | 3      | 3      | 3      | 3      | 2      | 3      | 2      | 2      |
|  | 0      | 0      | 0      | 0      | 0      | 0      | 0      | 0      | 0      |
|  | 5      | 5      | 5      | 5      | 5      | 5      | 5      | 6      | 5      |
|  | 2      | 2      | 2      | 2      | 2      | 2      | 1      | 1      | 1      |
|  | 6      | 6      | 6      | 6      | 6      | 6      | 6      | 6      | 6      |
|  | 11     | 10     | 9      | 8      | 7      | 6      | 6      | 5      | 5      |
|  | 24     | 22     | 19     | 17     | 15     | 13     | 11     | 9      | 7      |
|  | 0      | 0      | 0      | 0      | 0      | 0      | 0      | 0      | 0      |
|  | 129    | 128    | 127    | 127    | 125    | 125    | 124    | 122    | 119    |
|  | 118    | 115    | 112    | 107    | 102    | 97     | 92     | 88     | 84     |
|  | 256    | 239    | 226    | 220    | 216    | 213    | 213    | 213    | 209    |
|  | 503    | 485    | 466    | 444    | 425    | 406    | 386    | 371    | 367    |
|  | 639    | 620    | 599    | 577    | 548    | 526    | 501    | 474    | 446    |
|  | 743    | 733    | 722    | 708    | 694    | 672    | 649    | 622    | 594    |
|  | 867    | 856    | 843    | 831    | 821    | 808    | 795    | 781    | 763    |
|  | 1,051  | 968    | 913    | 870    | 835    | 810    | 792    | 771    | 751    |
|  | 856    | 898    | 906    | 895    | 881    | 853    | 782    | 732    | 692    |
|  | 503    | 495    | 491    | 492    | 485    | 485    | 514    | 518    | 510    |
|  | 235    | 243    | 255    | 264    | 272    | 274    | 282    | 295    | 312    |
|  | 26     | 27     | 28     | 28     | 29     | 29     | 30     | 30     | 30     |
|  | 11,836 | 11,647 | 11,457 | 11,260 | 11,057 | 10,842 | 10,630 | 10,411 | 10,188 |
|  | 19.46% | 18.98% | 18.50% | 18.02% | 17.54% | 17.05% | 16.57% | 16.09% | 15.62% |

|    |             |
|----|-------------|
| 1  |             |
| 2  |             |
| 3  |             |
| 4  | <b>2040</b> |
| 5  | 3           |
| 6  | 0           |
| 7  | 0           |
| 8  | 1           |
| 9  | 0           |
| 10 | 0           |
| 11 | 0           |
| 12 | 14          |
| 13 | 0           |
| 14 | 34          |
| 15 | 43          |
| 16 | 47          |
| 17 | 115         |
| 18 | 271         |
| 19 | 313         |
| 20 | 561         |
| 21 | 518         |
| 22 | 660         |
| 23 | 869         |
| 24 | 1,051       |
| 25 | 602         |
| 26 | 96          |
| 27 |             |
| 28 |             |
| 29 |             |
| 30 |             |
| 31 | 3           |
| 32 | 2           |
| 33 | 0           |
| 34 | 5           |
| 35 | 1           |
| 36 | 6           |
| 37 | 4           |
| 38 | 6           |
| 39 | 0           |
| 40 | 115         |
| 41 | 80          |
| 42 | 205         |
| 43 | 367         |
| 44 | 421         |
| 45 | 561         |
| 46 | 746         |
| 47 | 731         |
| 48 | 657         |
| 49 | 498         |
| 50 | 321         |
| 51 | 29          |
| 52 |             |
| 53 |             |
| 54 |             |
| 55 |             |
| 56 |             |
| 57 |             |
| 58 | 9,957       |
| 59 | 15.14%      |
| 60 |             |

For peer review only

1  
2  
3  
4  
5  
6  
7  
8  
9  
10  
11  
12  
13  
14  
15  
16  
17  
18  
19  
20  
21  
22  
23  
24  
25  
26  
27  
28  
29  
30  
31  
32  
33  
34  
35  
36  
37  
38  
39  
40  
41  
42  
43  
44  
45  
46  
47  
48  
49  
50  
51  
52  
53  
54  
55  
56  
57  
58  
59  
60

|                                 | Baseline     |              |              |              |              |              |
|---------------------------------|--------------|--------------|--------------|--------------|--------------|--------------|
| Group                           | 2007         | 2008         | 2009         | 2010         | 2011         | 2012         |
| Females 0 - 4                   | 0            | 0            | 0            | 0            | 0            | 0            |
| Females 5 - 9                   | 0            | 0            | 0            | 0            | 0            | 0            |
| Females 10 - 14                 | 0            | 0            | 0            | 0            | 0            | 0            |
| Females 15 - 19                 | 0            | 0            | 0            | 0            | 0            | 0            |
| Females 20 - 24                 | 0            | 0            | 0            | 0            | 0            | 0            |
| Females 25 - 29                 | 0            | 0            | 0            | 0            | 0            | 0            |
| Females 30 - 34                 | 0            | 0            | 0            | 0            | 0            | 0            |
| Females 35 - 39                 | 0            | 0            | 0            | 0            | 0            | 0            |
| Females 40 - 44                 | 0            | 0            | 0            | 0            | 0            | 0            |
| Females 45 - 49                 | 1            | 1            | 2            | 1            | 0            | 0            |
| Females 50 - 54                 | 0            | 5            | 0            | 1            | 2            | 0            |
| Females 55 - 59                 | 2            | 7            | 3            | 1            | 4            | 4            |
| Females 60 - 64                 | 14           | 13           | 15           | 9            | 13           | 14           |
| Females 65 - 69                 | 28           | 19           | 32           | 25           | 23           | 40           |
| Females 70 - 74                 | 71           | 86           | 73           | 87           | 65           | 98           |
| Females 75 - 79                 | 194          | 231          | 206          | 214          | 213          | 275          |
| Females 80 - 84                 | 438          | 466          | 406          | 438          | 497          | 598          |
| Females 85 - 89                 | 611          | 695          | 778          | 737          | 837          | 948          |
| Females 90 - 94                 | 588          | 578          | 585          | 624          | 777          | 955          |
| Females 95 - 99                 | 309          | 313          | 273          | 351          | 378          | 435          |
| Females 100+                    | 71           | 69           | 91           | 86           | 90           | 102          |
| Males 0 - 4                     | 0            | 0            | 0            | 0            | 0            | 0            |
| Males 5 - 9                     | 0            | 0            | 0            | 0            | 0            | 0            |
| Males 10 - 14                   | 0            | 0            | 0            | 0            | 0            | 0            |
| Males 15 - 19                   | 0            | 0            | 0            | 0            | 0            | 0            |
| Males 20 - 24                   | 0            | 0            | 0            | 0            | 0            | 0            |
| Males 25 - 29                   | 0            | 0            | 0            | 0            | 0            | 0            |
| Males 30 - 34                   | 0            | 0            | 0            | 0            | 0            | 0            |
| Males 35 - 39                   | 0            | 0            | 0            | 0            | 0            | 0            |
| Males 40 - 44                   | 0            | 0            | 0            | 0            | 0            | 0            |
| Males 45 - 49                   | 1            | 0            | 0            | 1            | 0            | 0            |
| Males 50 - 54                   | 1            | 2            | 3            | 1            | 1            | 3            |
| Males 55 - 59                   | 2            | 2            | 2            | 3            | 1            | 2            |
| Males 60 - 64                   | 12           | 11           | 22           | 16           | 14           | 16           |
| Males 65 - 69                   | 29           | 24           | 28           | 29           | 17           | 37           |
| Males 70 - 74                   | 70           | 79           | 77           | 58           | 76           | 75           |
| Males 75 - 79                   | 144          | 139          | 140          | 181          | 164          | 179          |
| Males 80 - 84                   | 221          | 271          | 249          | 276          | 336          | 360          |
| Males 85 - 89                   | 228          | 220          | 275          | 270          | 380          | 402          |
| Males 90 - 94                   | 134          | 154          | 136          | 176          | 208          | 271          |
| Males 95 - 99                   | 45           | 52           | 50           | 61           | 77           | 77           |
| Males 100+                      | 2            | 12           | 9            | 11           | 6            | 15           |
| <b>Dementia Deaths</b>          | <b>3,216</b> | <b>3,449</b> | <b>3,455</b> | <b>3,657</b> | <b>4,179</b> | <b>4,906</b> |
| <b>Percentage of All Deaths</b> | <b>5.74%</b> | <b>6.19%</b> | <b>6.42%</b> | <b>6.78%</b> | <b>7.79%</b> | <b>8.93%</b> |



|    | 2013  | 2014  | 2015   | 2016   | 2017   | 2018   | 2019   | 2020   | 2021   |
|----|-------|-------|--------|--------|--------|--------|--------|--------|--------|
| 1  |       |       |        |        |        |        |        |        |        |
| 2  |       |       |        |        |        |        |        |        |        |
| 3  |       |       |        |        |        |        |        |        |        |
| 4  |       |       |        |        |        |        |        |        |        |
| 5  | 0     | 0     | 0      | 0      | 0      | 0      | 0      | 0      | 0      |
| 6  | 0     | 0     | 0      | 0      | 0      | 0      | 0      | 0      | 0      |
| 7  | 0     | 0     | 0      | 0      | 0      | 0      | 0      | 0      | 0      |
| 8  | 0     | 0     | 0      | 0      | 0      | 0      | 0      | 0      | 0      |
| 9  | 0     | 0     | 0      | 0      | 0      | 0      | 0      | 0      | 0      |
| 10 | 0     | 0     | 0      | 0      | 0      | 0      | 0      | 0      | 0      |
| 11 | 0     | 0     | 0      | 0      | 0      | 0      | 0      | 0      | 0      |
| 12 | 0     | 0     | 0      | 0      | 0      | 0      | 0      | 0      | 0      |
| 13 | 0     | 0     | 0      | 0      | 0      | 0      | 0      | 0      | 0      |
| 14 | 0     | 0     | 0      | 0      | 0      | 0      | 0      | 0      | 0      |
| 15 | 0     | 0     | 0      | 0      | 0      | 0      | 0      | 0      | 0      |
| 16 | 2     | 0     | 1      | 0      | 0      | 0      | 0      | 0      | 0      |
| 17 | 1     | 0     | 1      | 2      | 1      | 1      | 1      | 1      | 1      |
| 18 | 1     | 7     | 6      | 9      | 2      | 2      | 2      | 2      | 2      |
| 19 | 17    | 12    | 14     | 16     | 21     | 21     | 22     | 23     | 24     |
| 20 | 36    | 24    | 51     | 46     | 38     | 38     | 38     | 38     | 39     |
| 21 | 105   | 94    | 108    | 115    | 119    | 131    | 139    | 147    | 154    |
| 22 | 251   | 282   | 290    | 308    | 361    | 365    | 383    | 399    | 421    |
| 23 | 652   | 666   | 691    | 633    | 788    | 828    | 866    | 902    | 928    |
| 24 | 1,021 | 945   | 1,162  | 1,096  | 1,316  | 1,349  | 1,421  | 1,492  | 1,562  |
| 25 | 1,000 | 1,035 | 1,176  | 1,091  | 1,269  | 1,243  | 1,308  | 1,380  | 1,454  |
| 26 | 420   | 409   | 485    | 495    | 543    | 525    | 553    | 564    | 585    |
| 27 | 107   | 97    | 98     | 103    | 97     | 88     | 86     | 101    | 109    |
| 28 |       |       |        |        |        |        |        |        |        |
| 29 |       |       |        |        |        |        |        |        |        |
| 30 |       |       |        |        |        |        |        |        |        |
| 31 |       |       |        |        |        |        |        |        |        |
| 32 | 0     | 0     | 0      | 0      | 0      | 0      | 0      | 0      | 0      |
| 33 | 0     | 0     | 0      | 0      | 0      | 0      | 0      | 0      | 0      |
| 34 | 0     | 0     | 0      | 0      | 0      | 0      | 0      | 0      | 0      |
| 35 | 0     | 0     | 0      | 0      | 0      | 0      | 0      | 0      | 0      |
| 36 | 0     | 0     | 0      | 0      | 0      | 0      | 0      | 0      | 0      |
| 37 | 0     | 0     | 0      | 0      | 0      | 0      | 0      | 0      | 0      |
| 38 | 0     | 0     | 0      | 0      | 0      | 0      | 0      | 0      | 0      |
| 39 | 0     | 0     | 0      | 0      | 0      | 0      | 0      | 0      | 0      |
| 40 | 0     | 0     | 0      | 0      | 0      | 0      | 0      | 0      | 0      |
| 41 | 0     | 0     | 1      | 0      | 0      | 0      | 0      | 0      | 0      |
| 42 | 1     | 0     | 0      | 0      | 0      | 0      | 0      | 0      | 0      |
| 43 | 2     | 2     | 2      | 2      | 1      | 1      | 1      | 1      | 1      |
| 44 | 1     | 4     | 3      | 3      | 5      | 5      | 6      | 6      | 6      |
| 45 | 8     | 15    | 11     | 10     | 11     | 11     | 11     | 11     | 11     |
| 46 | 36    | 33    | 35     | 45     | 31     | 30     | 29     | 29     | 29     |
| 47 | 78    | 68    | 93     | 105    | 113    | 125    | 131    | 139    | 144    |
| 48 | 194   | 204   | 257    | 217    | 313    | 312    | 332    | 350    | 376    |
| 49 | 352   | 398   | 438    | 426    | 511    | 522    | 554    | 582    | 604    |
| 50 | 451   | 479   | 566    | 548    | 665    | 692    | 742    | 798    | 849    |
| 51 | 288   | 328   | 374    | 378    | 424    | 419    | 450    | 483    | 522    |
| 52 | 74    | 87    | 91     | 108    | 131    | 126    | 142    | 154    | 168    |
| 53 | 9     | 12    | 8      | 22     | 16     | 11     | 12     | 15     | 19     |
| 54 |       |       |        |        |        |        |        |        |        |
| 55 |       |       |        |        |        |        |        |        |        |
| 56 |       |       |        |        |        |        |        |        |        |
| 57 |       |       |        |        |        |        |        |        |        |
| 58 | 5,107 | 5,201 | 5,962  | 5,778  | 6,776  | 6,846  | 7,230  | 7,617  | 8,008  |
| 59 | 9.34% | 9.59% | 10.36% | 10.19% | 11.71% | 12.19% | 12.82% | 13.45% | 14.08% |
| 60 |       |       |        |        |        |        |        |        |        |

1  
2  
3  
4  
5  
6  
7  
8  
9  
10  
11  
12  
13  
14  
15  
16  
17  
18  
19  
20  
21  
22  
23  
24  
25  
26  
27  
28  
29  
30  
31  
32  
33  
34  
35  
36  
37  
38  
39  
40  
41  
42  
43  
44  
45  
46  
47  
48  
49  
50  
51  
52  
53  
54  
55  
56  
57  
58  
59  
60

|        |        |        |        |        |        |        | Projected |        |  |
|--------|--------|--------|--------|--------|--------|--------|-----------|--------|--|
| 2022   | 2023   | 2024   | 2025   | 2026   | 2027   | 2028   | 2029      | 2030   |  |
| 0      | 0      | 0      | 0      | 0      | 0      | 0      | 0         | 0      |  |
| 0      | 0      | 0      | 0      | 0      | 0      | 0      | 0         | 0      |  |
| 0      | 0      | 0      | 0      | 0      | 0      | 0      | 0         | 0      |  |
| 0      | 0      | 0      | 0      | 0      | 0      | 0      | 0         | 0      |  |
| 0      | 0      | 0      | 0      | 0      | 0      | 0      | 0         | 0      |  |
| 0      | 0      | 0      | 0      | 0      | 0      | 0      | 0         | 0      |  |
| 0      | 0      | 0      | 0      | 0      | 0      | 0      | 0         | 0      |  |
| 0      | 0      | 0      | 0      | 0      | 0      | 0      | 0         | 0      |  |
| 0      | 0      | 0      | 0      | 0      | 0      | 0      | 0         | 0      |  |
| 0      | 0      | 0      | 0      | 0      | 0      | 0      | 0         | 0      |  |
| 0      | 0      | 0      | 0      | 0      | 0      | 0      | 0         | 0      |  |
| 0      | 0      | 0      | 0      | 0      | 0      | 0      | 0         | 0      |  |
| 0      | 0      | 0      | 0      | 0      | 0      | 0      | 0         | 0      |  |
| 0      | 0      | 0      | 0      | 0      | 0      | 0      | 0         | 0      |  |
| 0      | 0      | 0      | 0      | 0      | 0      | 0      | 0         | 0      |  |
| 1      | 1      | 1      | 1      | 1      | 1      | 1      | 1         | 1      |  |
| 2      | 2      | 2      | 2      | 2      | 2      | 2      | 1         | 1      |  |
| 25     | 26     | 26     | 27     | 28     | 28     | 29     | 29        | 29     |  |
| 41     | 42     | 43     | 45     | 47     | 48     | 50     | 51        | 52     |  |
| 151    | 151    | 153    | 157    | 161    | 168    | 174    | 181       | 189    |  |
| 463    | 494    | 521    | 551    | 577    | 565    | 567    | 575       | 589    |  |
| 960    | 1,001  | 1,044  | 1,083  | 1,139  | 1,249  | 1,327  | 1,398     | 1,473  |  |
| 1,630  | 1,713  | 1,789  | 1,860  | 1,911  | 1,977  | 2,065  | 2,158     | 2,240  |  |
| 1,540  | 1,612  | 1,687  | 1,765  | 1,848  | 1,930  | 2,026  | 2,117     | 2,203  |  |
| 602    | 621    | 647    | 677    | 711    | 750    | 781    | 818       | 858    |  |
| 116    | 118    | 122    | 125    | 131    | 134    | 138    | 145       | 153    |  |
| 0      | 0      | 0      | 0      | 0      | 0      | 0      | 0         | 0      |  |
| 0      | 0      | 0      | 0      | 0      | 0      | 0      | 0         | 0      |  |
| 0      | 0      | 0      | 0      | 0      | 0      | 0      | 0         | 0      |  |
| 0      | 0      | 0      | 0      | 0      | 0      | 0      | 0         | 0      |  |
| 0      | 0      | 0      | 0      | 0      | 0      | 0      | 0         | 0      |  |
| 0      | 0      | 0      | 0      | 0      | 0      | 0      | 0         | 0      |  |
| 0      | 0      | 0      | 0      | 0      | 0      | 0      | 0         | 0      |  |
| 0      | 0      | 0      | 0      | 0      | 0      | 0      | 0         | 0      |  |
| 0      | 0      | 0      | 0      | 0      | 0      | 0      | 0         | 0      |  |
| 0      | 0      | 0      | 0      | 0      | 0      | 0      | 0         | 0      |  |
| 0      | 0      | 0      | 0      | 0      | 0      | 0      | 0         | 0      |  |
| 1      | 1      | 1      | 1      | 1      | 1      | 1      | 1         | 1      |  |
| 6      | 6      | 7      | 7      | 7      | 7      | 7      | 7         | 7      |  |
| 11     | 11     | 11     | 11     | 11     | 11     | 11     | 11        | 10     |  |
| 29     | 29     | 29     | 30     | 30     | 30     | 30     | 31        | 31     |  |
| 140    | 140    | 141    | 143    | 147    | 153    | 158    | 164       | 170    |  |
| 420    | 454    | 480    | 510    | 535    | 524    | 527    | 535       | 548    |  |
| 633    | 664    | 704    | 739    | 791    | 883    | 952    | 1,007     | 1,068  |  |
| 898    | 959    | 1,018  | 1,070  | 1,110  | 1,165  | 1,229  | 1,309     | 1,379  |  |
| 569    | 615    | 659    | 708    | 757    | 803    | 862    | 919       | 970    |  |
| 178    | 188    | 203    | 219    | 239    | 262    | 283    | 306       | 332    |  |
| 21     | 24     | 26     | 30     | 33     | 36     | 39     | 44        | 49     |  |
| 8,436  | 8,870  | 9,315  | 9,761  | 10,216 | 10,727 | 11,258 | 11,805    | 12,351 |  |
| 14.76% | 15.44% | 16.13% | 16.79% | 17.45% | 18.21% | 18.97% | 19.73%    | 20.48% |  |

|    | 2031   | 2032   | 2033   | 2034   | 2035   | 2036   | 2037   | 2038   | 2039   |
|----|--------|--------|--------|--------|--------|--------|--------|--------|--------|
| 1  |        |        |        |        |        |        |        |        |        |
| 2  |        |        |        |        |        |        |        |        |        |
| 3  |        |        |        |        |        |        |        |        |        |
| 4  |        |        |        |        |        |        |        |        |        |
| 5  | 0      | 0      | 0      | 0      | 0      | 0      | 0      | 0      | 0      |
| 6  | 0      | 0      | 0      | 0      | 0      | 0      | 0      | 0      | 0      |
| 7  | 0      | 0      | 0      | 0      | 0      | 0      | 0      | 0      | 0      |
| 8  | 0      | 0      | 0      | 0      | 0      | 0      | 0      | 0      | 0      |
| 9  | 0      | 0      | 0      | 0      | 0      | 0      | 0      | 0      | 0      |
| 10 | 0      | 0      | 0      | 0      | 0      | 0      | 0      | 0      | 0      |
| 11 | 0      | 0      | 0      | 0      | 0      | 0      | 0      | 0      | 0      |
| 12 | 0      | 0      | 0      | 0      | 0      | 0      | 0      | 0      | 0      |
| 13 | 0      | 0      | 0      | 0      | 0      | 0      | 0      | 0      | 0      |
| 14 | 0      | 0      | 0      | 0      | 0      | 0      | 0      | 0      | 0      |
| 15 | 0      | 0      | 0      | 0      | 0      | 0      | 0      | 0      | 0      |
| 16 | 0      | 0      | 0      | 0      | 0      | 0      | 0      | 0      | 0      |
| 17 | 2      | 2      | 2      | 2      | 2      | 2      | 2      | 2      | 2      |
| 18 | 1      | 1      | 1      | 1      | 1      | 1      | 1      | 1      | 1      |
| 19 | 29     | 29     | 28     | 28     | 27     | 26     | 25     | 25     | 25     |
| 20 | 53     | 54     | 54     | 54     | 54     | 53     | 53     | 52     | 50     |
| 21 | 196    | 203    | 210    | 217    | 225    | 229    | 233    | 235    | 236    |
| 22 | 607    | 633    | 658    | 687    | 715    | 743    | 772    | 800    | 827    |
| 23 | 1,540  | 1,505  | 1,511  | 1,533  | 1,571  | 1,622  | 1,690  | 1,760  | 1,837  |
| 24 | 2,354  | 2,595  | 2,766  | 2,917  | 3,068  | 3,201  | 3,145  | 3,170  | 3,231  |
| 25 | 2,263  | 2,346  | 2,464  | 2,586  | 2,690  | 2,828  | 3,158  | 3,383  | 3,568  |
| 26 | 904    | 950    | 1,002  | 1,050  | 1,098  | 1,132  | 1,182  | 1,255  | 1,328  |
| 27 | 163    | 173    | 181    | 193    | 207    | 223    | 238    | 254    | 271    |
| 28 |        |        |        |        |        |        |        |        |        |
| 29 |        |        |        |        |        |        |        |        |        |
| 30 |        |        |        |        |        |        |        |        |        |
| 31 |        |        |        |        |        |        |        |        |        |
| 32 | 0      | 0      | 0      | 0      | 0      | 0      | 0      | 0      | 0      |
| 33 | 0      | 0      | 0      | 0      | 0      | 0      | 0      | 0      | 0      |
| 34 | 0      | 0      | 0      | 0      | 0      | 0      | 0      | 0      | 0      |
| 35 | 0      | 0      | 0      | 0      | 0      | 0      | 0      | 0      | 0      |
| 36 | 0      | 0      | 0      | 0      | 0      | 0      | 0      | 0      | 0      |
| 37 | 0      | 0      | 0      | 0      | 0      | 0      | 0      | 0      | 0      |
| 38 | 0      | 0      | 0      | 0      | 0      | 0      | 0      | 0      | 0      |
| 39 | 0      | 0      | 0      | 0      | 0      | 0      | 0      | 0      | 0      |
| 40 | 0      | 0      | 0      | 0      | 0      | 0      | 0      | 0      | 0      |
| 41 | 0      | 0      | 0      | 0      | 0      | 0      | 0      | 0      | 0      |
| 42 | 0      | 0      | 0      | 0      | 0      | 0      | 0      | 0      | 0      |
| 43 | 0      | 0      | 0      | 0      | 0      | 0      | 0      | 0      | 0      |
| 44 | 1      | 1      | 1      | 1      | 1      | 1      | 1      | 1      | 1      |
| 45 | 6      | 6      | 6      | 6      | 7      | 7      | 7      | 7      | 8      |
| 46 | 10     | 10     | 9      | 9      | 9      | 8      | 8      | 8      | 8      |
| 47 | 30     | 30     | 30     | 29     | 28     | 28     | 27     | 26     | 25     |
| 48 | 176    | 182    | 188    | 193    | 199    | 202    | 205    | 206    | 207    |
| 49 | 567    | 592    | 616    | 642    | 671    | 699    | 727    | 755    | 780    |
| 50 | 1,118  | 1,098  | 1,104  | 1,123  | 1,152  | 1,194  | 1,249  | 1,302  | 1,359  |
| 51 | 1,478  | 1,665  | 1,803  | 1,914  | 2,027  | 2,115  | 2,092  | 2,118  | 2,168  |
| 52 | 1,008  | 1,063  | 1,131  | 1,216  | 1,287  | 1,385  | 1,581  | 1,722  | 1,834  |
| 53 | 358    | 384    | 417    | 449    | 478    | 499    | 532    | 576    | 629    |
| 54 | 55     | 63     | 70     | 77     | 87     | 95     | 107    | 121    | 133    |
| 55 |        |        |        |        |        |        |        |        |        |
| 56 |        |        |        |        |        |        |        |        |        |
| 57 |        |        |        |        |        |        |        |        |        |
| 58 | 12,920 | 13,585 | 14,253 | 14,929 | 15,602 | 16,294 | 17,035 | 17,780 | 18,528 |
| 59 | 21.24% | 22.14% | 23.02% | 23.89% | 24.75% | 25.62% | 26.55% | 27.48% | 28.40% |
| 60 |        |        |        |        |        |        |        |        |        |

|    |             |
|----|-------------|
| 1  |             |
| 2  |             |
| 3  |             |
| 4  | <b>2040</b> |
| 5  | 0           |
| 6  | 0           |
| 7  | 0           |
| 8  | 0           |
| 9  | 0           |
| 10 | 0           |
| 11 | 0           |
| 12 | 0           |
| 13 | 0           |
| 14 | 0           |
| 15 | 0           |
| 16 | 0           |
| 17 | 2           |
| 18 | 1           |
| 19 | 26          |
| 20 | 49          |
| 21 | 234         |
| 22 | 855         |
| 23 | 1,912       |
| 24 | 3,323       |
| 25 | 3,738       |
| 26 | 1,389       |
| 27 | 288         |
| 28 |             |
| 29 |             |
| 30 |             |
| 31 |             |
| 32 | 0           |
| 33 | 0           |
| 34 | 0           |
| 35 | 0           |
| 36 | 0           |
| 37 | 0           |
| 38 | 0           |
| 39 | 0           |
| 40 | 0           |
| 41 | 0           |
| 42 | 0           |
| 43 | 0           |
| 44 | 1           |
| 45 | 8           |
| 46 | 8           |
| 47 | 24          |
| 48 | 205         |
| 49 | 807         |
| 50 | 1,422       |
| 51 | 2,235       |
| 52 | 1,940       |
| 53 | 670         |
| 54 | 146         |
| 55 |             |
| 56 |             |
| 57 |             |
| 58 | 19,284      |
| 59 | 29.33%      |
| 60 |             |

For peer review only

1  
2  
3  
4  
5  
6  
7  
8  
9  
10  
11  
12  
13  
14  
15  
16  
17  
18  
19  
20  
21  
22  
23  
24  
25  
26  
27  
28  
29  
30  
31  
32  
33  
34  
35  
36  
37  
38  
39  
40  
41  
42  
43  
44  
45  
46  
47  
48  
49  
50  
51  
52  
53  
54  
55  
56  
57  
58  
59  
60

| Group                               | Baseline |        |        |        |       |       |
|-------------------------------------|----------|--------|--------|--------|-------|-------|
|                                     | 2007     | 2008   | 2009   | 2010   | 2011  | 2012  |
| Females 0 - 4                       | 0        | 0      | 0      | 0      | 1     | 1     |
| Females 5 - 9                       | 0        | 2      | 0      | 0      | 0     | 0     |
| Females 10 - 14                     | 1        | 1      | 0      | 0      | 1     | 0     |
| Females 15 - 19                     | 1        | 2      | 0      | 2      | 1     | 1     |
| Females 20 - 24                     | 1        | 1      | 0      | 0      | 1     | 0     |
| Females 25 - 29                     | 2        | 1      | 2      | 1      | 2     | 3     |
| Females 30 - 34                     | 5        | 9      | 1      | 6      | 3     | 2     |
| Females 35 - 39                     | 13       | 10     | 12     | 6      | 9     | 6     |
| Females 40 - 44                     | 27       | 19     | 20     | 14     | 11    | 16    |
| Females 45 - 49                     | 32       | 33     | 35     | 36     | 22    | 42    |
| Females 50 - 54                     | 44       | 37     | 44     | 47     | 57    | 49    |
| Females 55 - 59                     | 52       | 53     | 57     | 54     | 53    | 53    |
| Females 60 - 64                     | 102      | 114    | 89     | 102    | 76    | 80    |
| Females 65 - 69                     | 134      | 141    | 123    | 112    | 124   | 123   |
| Females 70 - 74                     | 237      | 234    | 247    | 217    | 206   | 231   |
| Females 75 - 79                     | 446      | 463    | 394    | 383    | 395   | 375   |
| Females 80 - 84                     | 732      | 728    | 678    | 667    | 617   | 583   |
| Females 85 - 89                     | 870      | 895    | 815    | 815    | 775   | 730   |
| Females 90 - 94                     | 619      | 578    | 550    | 514    | 544   | 589   |
| Females 95 - 99                     | 260      | 251    | 244    | 242    | 234   | 246   |
| Females 100+                        | 31       | 37     | 54     | 37     | 48    | 37    |
| Males 0 - 4                         | 0        | 2      | 1      | 0      | 0     | 0     |
| Males 5 - 9                         | 0        | 0      | 0      | 0      | 0     | 0     |
| Males 10 - 14                       | 1        | 0      | 0      | 0      | 0     | 0     |
| Males 15 - 19                       | 1        | 1      | 1      | 2      | 0     | 0     |
| Males 20 - 24                       | 2        | 0      | 1      | 4      | 2     | 0     |
| Males 25 - 29                       | 1        | 4      | 2      | 3      | 2     | 1     |
| Males 30 - 34                       | 8        | 7      | 3      | 4      | 6     | 7     |
| Males 35 - 39                       | 10       | 15     | 15     | 9      | 9     | 10    |
| Males 40 - 44                       | 24       | 25     | 31     | 26     | 23    | 11    |
| Males 45 - 49                       | 50       | 43     | 27     | 37     | 30    | 31    |
| Males 50 - 54                       | 61       | 66     | 57     | 42     | 44    | 44    |
| Males 55 - 59                       | 67       | 65     | 64     | 66     | 68    | 80    |
| Males 60 - 64                       | 110      | 126    | 107    | 110    | 115   | 85    |
| Males 65 - 69                       | 156      | 182    | 152    | 151    | 169   | 142   |
| Males 70 - 74                       | 280      | 289    | 277    | 227    | 249   | 220   |
| Males 75 - 79                       | 418      | 390    | 377    | 409    | 338   | 354   |
| Males 80 - 84                       | 485      | 491    | 458    | 499    | 469   | 459   |
| Males 85 - 89                       | 435      | 430    | 436    | 412    | 379   | 382   |
| Males 90 - 94                       | 207      | 181    | 174    | 176    | 215   | 207   |
| Males 95 - 99                       | 49       | 55     | 45     | 69     | 42    | 51    |
| Males 100+                          | 2        | 8      | 6      | 4      | 6     | 5     |
| <b>Other Palliative Care Deaths</b> | 5,976    | 5,989  | 5,599  | 5,505  | 5,346 | 5,256 |
| <b>Percentage of All Deaths</b>     | 10.67%   | 10.75% | 10.40% | 10.20% | 9.96% | 9.57% |

1  
2  
3  
4  
5  
6  
7  
8  
9  
10  
11  
12  
13  
14  
15  
16  
17  
18  
19  
20  
21  
22  
23  
24  
25  
26  
27  
28  
29  
30  
31  
32  
33  
34  
35  
36  
37  
38  
39  
40  
41  
42  
43  
44  
45  
46  
47  
48  
49  
50  
51  
52  
53  
54  
55  
56  
57  
58  
59  
60

| 2013  | 2014  | 2015  | 2016  | 2017  | 2018  | 2019  | 2020  | 2021  |
|-------|-------|-------|-------|-------|-------|-------|-------|-------|
| 0     | 0     | 0     | 0     | 0     | 0     | 0     | 0     | 0     |
| 0     | 0     | 0     | 0     | 0     | 0     | 0     | 0     | 0     |
| 0     | 0     | 0     | 0     | 0     | 0     | 0     | 0     | 0     |
| 0     | 0     | 1     | 1     | 0     | 0     | 0     | 0     | 0     |
| 0     | 2     | 1     | 1     | 1     | 1     | 1     | 1     | 1     |
| 3     | 1     | 1     | 1     | 1     | 1     | 1     | 1     | 1     |
| 4     | 6     | 1     | 4     | 2     | 2     | 2     | 1     | 1     |
| 5     | 8     | 12    | 5     | 9     | 7     | 7     | 6     | 6     |
| 18    | 9     | 13    | 21    | 16    | 13    | 12    | 11    | 11    |
| 23    | 26    | 32    | 30    | 26    | 26    | 25    | 24    | 22    |
| 45    | 50    | 42    | 40    | 39    | 37    | 35    | 33    | 32    |
| 59    | 56    | 53    | 58    | 59    | 59    | 59    | 60    | 60    |
| 94    | 77    | 84    | 99    | 85    | 81    | 80    | 80    | 80    |
| 126   | 130   | 146   | 127   | 115   | 110   | 106   | 103   | 102   |
| 240   | 181   | 201   | 203   | 187   | 194   | 192   | 191   | 189   |
| 388   | 343   | 351   | 340   | 319   | 297   | 287   | 276   | 269   |
| 575   | 547   | 570   | 532   | 503   | 486   | 468   | 448   | 424   |
| 714   | 663   | 618   | 640   | 653   | 610   | 586   | 561   | 535   |
| 540   | 545   | 596   | 497   | 510   | 457   | 440   | 424   | 407   |
| 211   | 193   | 215   | 204   | 203   | 180   | 173   | 161   | 152   |
| 33    | 45    | 38    | 39    | 33    | 29    | 28    | 32    | 34    |
| 0     | 0     | 0     | 0     | 0     | 0     | 0     | 0     | 0     |
| 0     | 0     | 1     | 1     | 0     | 0     | 0     | 0     | 0     |
| 2     | 0     | 0     | 0     | 1     | 1     | 1     | 1     | 1     |
| 0     | 0     | 0     | 0     | 1     | 1     | 1     | 1     | 1     |
| 0     | 1     | 1     | 0     | 0     | 0     | 0     | 0     | 0     |
| 2     | 0     | 2     | 5     | 2     | 2     | 2     | 2     | 2     |
| 6     | 0     | 8     | 3     | 6     | 5     | 5     | 5     | 5     |
| 10    | 9     | 9     | 6     | 11    | 10    | 10    | 11    | 11    |
| 13    | 20    | 18    | 17    | 20    | 18    | 18    | 18    | 18    |
| 35    | 17    | 24    | 37    | 30    | 22    | 20    | 17    | 14    |
| 44    | 49    | 51    | 49    | 50    | 44    | 42    | 40    | 38    |
| 67    | 72    | 63    | 86    | 68    | 69    | 70    | 70    | 70    |
| 92    | 94    | 102   | 97    | 111   | 109   | 110   | 112   | 114   |
| 155   | 139   | 179   | 158   | 148   | 141   | 136   | 132   | 130   |
| 230   | 211   | 231   | 237   | 242   | 254   | 254   | 256   | 254   |
| 370   | 334   | 358   | 310   | 359   | 334   | 334   | 331   | 334   |
| 470   | 428   | 464   | 471   | 418   | 396   | 389   | 380   | 367   |
| 408   | 390   | 411   | 404   | 373   | 349   | 337   | 325   | 311   |
| 231   | 211   | 246   | 229   | 236   | 214   | 211   | 208   | 207   |
| 49    | 56    | 57    | 67    | 63    | 56    | 59    | 59    | 60    |
| 8     | 7     | 6     | 7     | 9     | 6     | 6     | 8     | 10    |
| 5,270 | 4,920 | 5,206 | 5,026 | 4,909 | 4,621 | 4,507 | 4,390 | 4,270 |
| 9.63% | 9.07% | 9.04% | 8.86% | 8.48% | 8.23% | 7.99% | 7.75% | 7.51% |

1  
2  
3  
4  
5  
6  
7  
8  
9  
10  
11  
12  
13  
14  
15  
16  
17  
18  
19  
20  
21  
22  
23  
24  
25  
26  
27  
28  
29  
30  
31  
32  
33  
34  
35  
36  
37  
38  
39  
40  
41  
42  
43  
44  
45  
46  
47  
48  
49  
50  
51  
52  
53  
54  
55  
56  
57  
58  
59  
60

## Projected

| 2022  | 2023  | 2024  | 2025  | 2026  | 2027  | 2028  | 2029  | 2030  |
|-------|-------|-------|-------|-------|-------|-------|-------|-------|
| 0     | 0     | 0     | 0     | 0     | 0     | 0     | 0     | 0     |
| 0     | 0     | 0     | 0     | 0     | 0     | 0     | 0     | 0     |
| 0     | 0     | 0     | 0     | 0     | 0     | 0     | 0     | 0     |
| 0     | 0     | 0     | 0     | 0     | 0     | 0     | 0     | 0     |
| 1     | 1     | 1     | 1     | 1     | 1     | 1     | 1     | 1     |
| 1     | 1     | 0     | 0     | 0     | 0     | 0     | 0     | 0     |
| 1     | 0     | 0     | 0     | 0     | 0     | 0     | 0     | 0     |
| 5     | 5     | 5     | 4     | 4     | 4     | 3     | 3     | 2     |
| 10    | 10    | 9     | 8     | 7     | 7     | 6     | 5     | 4     |
| 21    | 20    | 20    | 20    | 20    | 20    | 21    | 20    | 20    |
| 30    | 28    | 26    | 24    | 23    | 21    | 19    | 19    | 18    |
| 60    | 59    | 58    | 57    | 56    | 55    | 53    | 50    | 49    |
| 79    | 79    | 78    | 78    | 76    | 75    | 73    | 70    | 67    |
| 101   | 100   | 100   | 100   | 100   | 100   | 99    | 98    | 98    |
| 174   | 164   | 157   | 152   | 148   | 145   | 142   | 140   | 137   |
| 273   | 268   | 261   | 254   | 246   | 221   | 203   | 189   | 177   |
| 404   | 387   | 371   | 353   | 340   | 341   | 331   | 317   | 302   |
| 508   | 485   | 460   | 433   | 402   | 374   | 349   | 325   | 298   |
| 393   | 374   | 355   | 336   | 317   | 297   | 278   | 258   | 236   |
| 142   | 132   | 123   | 114   | 106   | 97    | 87    | 77    | 67    |
| 35    | 35    | 36    | 36    | 37    | 37    | 38    | 39    | 40    |
| 0     | 0     | 0     | 0     | 0     | 0     | 0     | 0     | 0     |
| 0     | 0     | 0     | 0     | 0     | 0     | 0     | 0     | 0     |
| 1     | 1     | 1     | 1     | 1     | 1     | 1     | 1     | 1     |
| 1     | 1     | 1     | 1     | 1     | 1     | 1     | 1     | 1     |
| 0     | 0     | 0     | 0     | 0     | 0     | 0     | 0     | 0     |
| 2     | 2     | 2     | 2     | 2     | 2     | 2     | 2     | 2     |
| 4     | 4     | 4     | 4     | 4     | 3     | 3     | 3     | 3     |
| 11    | 11    | 11    | 12    | 12    | 12    | 12    | 12    | 12    |
| 19    | 19    | 19    | 19    | 19    | 19    | 19    | 20    | 20    |
| 12    | 10    | 8     | 7     | 5     | 4     | 2     | 0     | 0     |
| 36    | 33    | 31    | 29    | 27    | 25    | 24    | 23    | 22    |
| 69    | 68    | 67    | 65    | 64    | 62    | 60    | 58    | 56    |
| 116   | 117   | 118   | 120   | 120   | 119   | 118   | 117   | 114   |
| 129   | 128   | 127   | 128   | 128   | 127   | 127   | 125   | 125   |
| 236   | 225   | 217   | 211   | 208   | 207   | 205   | 204   | 204   |
| 353   | 359   | 360   | 363   | 360   | 336   | 320   | 310   | 302   |
| 358   | 351   | 347   | 340   | 341   | 356   | 358   | 355   | 352   |
| 295   | 281   | 266   | 248   | 227   | 208   | 190   | 174   | 155   |
| 207   | 205   | 202   | 199   | 195   | 189   | 186   | 180   | 173   |
| 59    | 58    | 58    | 58    | 58    | 59    | 59    | 58    | 58    |
| 11    | 12    | 13    | 14    | 16    | 17    | 18    | 20    | 22    |
| 4,155 | 4,035 | 3,914 | 3,791 | 3,669 | 3,541 | 3,409 | 3,274 | 3,138 |
| 7.27% | 7.03% | 6.78% | 6.52% | 6.27% | 6.01% | 5.74% | 5.47% | 5.20% |

1  
2  
3  
4  
5  
6  
7  
8  
9  
10  
11  
12  
13  
14  
15  
16  
17  
18  
19  
20  
21  
22  
23  
24  
25  
26  
27  
28  
29  
30  
31  
32  
33  
34  
35  
36  
37  
38  
39  
40  
41  
42  
43  
44  
45  
46  
47  
48  
49  
50  
51  
52  
53  
54  
55  
56  
57  
58  
59  
60

| 2031  | 2032  | 2033  | 2034  | 2035  | 2036  | 2037  | 2038  | 2039  |
|-------|-------|-------|-------|-------|-------|-------|-------|-------|
| 0     | 0     | 0     | 0     | 0     | 0     | 0     | 0     | 0     |
| 0     | 0     | 0     | 0     | 0     | 0     | 0     | 0     | 0     |
| 0     | 0     | 0     | 0     | 0     | 0     | 0     | 0     | 0     |
| 0     | 0     | 0     | 0     | 0     | 0     | 0     | 0     | 0     |
| 1     | 1     | 1     | 1     | 1     | 1     | 1     | 1     | 1     |
| 0     | 0     | 0     | 0     | 0     | 0     | 0     | 0     | 0     |
| 0     | 0     | 0     | 0     | 0     | 0     | 0     | 0     | 0     |
| 2     | 2     | 1     | 1     | 0     | 0     | 0     | 0     | 0     |
| 4     | 3     | 2     | 2     | 1     | 0     | 0     | 0     | 0     |
| 20    | 20    | 20    | 20    | 20    | 20    | 20    | 20    | 20    |
| 18    | 18    | 17    | 17    | 16    | 16    | 15    | 14    | 14    |
| 46    | 44    | 43    | 42    | 43    | 43    | 45    | 46    | 46    |
| 65    | 62    | 59    | 56    | 53    | 49    | 46    | 44    | 43    |
| 96    | 94    | 91    | 88    | 84    | 82    | 78    | 74    | 70    |
| 135   | 132   | 129   | 126   | 122   | 118   | 113   | 107   | 101   |
| 166   | 157   | 148   | 138   | 129   | 119   | 108   | 98    | 86    |
| 286   | 251   | 225   | 202   | 182   | 163   | 146   | 127   | 109   |
| 275   | 263   | 240   | 213   | 184   | 152   | 112   | 78    | 45    |
| 211   | 187   | 166   | 144   | 119   | 95    | 73    | 46    | 15    |
| 56    | 44    | 32    | 19    | 5     | 0     | 0     | 0     | 0     |
| 42    | 44    | 45    | 48    | 50    | 53    | 56    | 59    | 62    |
| 0     | 0     | 0     | 0     | 0     | 0     | 0     | 0     | 0     |
| 0     | 0     | 0     | 0     | 0     | 0     | 0     | 0     | 0     |
| 1     | 1     | 1     | 1     | 1     | 1     | 1     | 1     | 1     |
| 1     | 1     | 1     | 1     | 1     | 1     | 1     | 1     | 1     |
| 0     | 0     | 0     | 0     | 0     | 0     | 0     | 0     | 0     |
| 2     | 2     | 2     | 2     | 2     | 2     | 2     | 2     | 2     |
| 2     | 2     | 2     | 2     | 2     | 2     | 2     | 2     | 1     |
| 12    | 12    | 12    | 12    | 12    | 11    | 11    | 11    | 10    |
| 20    | 20    | 20    | 20    | 20    | 19    | 19    | 18    | 17    |
| 0     | 0     | 0     | 0     | 0     | 0     | 0     | 0     | 0     |
| 22    | 21    | 21    | 20    | 20    | 19    | 19    | 18    | 18    |
| 54    | 52    | 50    | 50    | 51    | 51    | 53    | 54    | 54    |
| 112   | 110   | 107   | 103   | 100   | 97    | 93    | 91    | 91    |
| 122   | 119   | 116   | 113   | 108   | 104   | 100   | 95    | 91    |
| 203   | 202   | 201   | 199   | 197   | 193   | 188   | 182   | 177   |
| 298   | 297   | 295   | 293   | 293   | 291   | 290   | 288   | 285   |
| 344   | 316   | 297   | 281   | 269   | 260   | 253   | 244   | 237   |
| 137   | 124   | 104   | 79    | 53    | 25    | 0     | 0     | 0     |
| 162   | 154   | 147   | 141   | 131   | 124   | 122   | 113   | 100   |
| 57    | 56    | 55    | 53    | 51    | 47    | 44    | 42    | 39    |
| 25    | 28    | 31    | 34    | 38    | 42    | 47    | 53    | 57    |
| 2,997 | 2,839 | 2,681 | 2,521 | 2,357 | 2,199 | 2,056 | 1,927 | 1,791 |
| 4.93% | 4.63% | 4.33% | 4.03% | 3.74% | 3.46% | 3.20% | 2.98% | 2.75% |



|    |             |
|----|-------------|
| 1  |             |
| 2  |             |
| 3  |             |
| 4  | <b>2040</b> |
| 5  | 0           |
| 6  | 0           |
| 7  | 0           |
| 8  | 0           |
| 9  | 0           |
| 10 | 1           |
| 11 | 0           |
| 12 | 0           |
| 13 | 0           |
| 14 | 0           |
| 15 | 0           |
| 16 | 19          |
| 17 | 13          |
| 18 | 46          |
| 19 | 42          |
| 20 | 66          |
| 21 | 94          |
| 22 | 75          |
| 23 | 89          |
| 24 | 12          |
| 25 | 0           |
| 26 | 0           |
| 27 | 64          |
| 28 |             |
| 29 |             |
| 30 |             |
| 31 |             |
| 32 | 0           |
| 33 | 0           |
| 34 | 1           |
| 35 | 1           |
| 36 | 0           |
| 37 | 2           |
| 38 | 1           |
| 39 | 10          |
| 40 | 17          |
| 41 | 0           |
| 42 | 17          |
| 43 | 55          |
| 44 | 92          |
| 45 | 86          |
| 46 | 169         |
| 47 | 282         |
| 48 | 229         |
| 49 | 0           |
| 50 | 85          |
| 51 | 35          |
| 52 | 62          |
| 53 |             |
| 54 |             |
| 55 |             |
| 56 |             |
| 57 |             |
| 58 | 1,668       |
| 59 | 2.54%       |
| 60 |             |

For peer review only

| Group                                       | 2007   | 2008   | 2009   | 2010   | 2011   |
|---------------------------------------------|--------|--------|--------|--------|--------|
| Females 0 - 4                               | 0      | 0      | 0      | 0      | 0      |
| Females 5 - 9                               | 1      | 1      | 0      | 1      | 0      |
| Females 10 - 14                             | 0      | 1      | 1      | 0      | 0      |
| Females 15 - 19                             | 1      | 1      | 1      | 2      | 1      |
| Females 20 - 24                             | 0      | 3      | 0      | 0      | 1      |
| Females 25 - 29                             | 1      | 0      | 2      | 0      | 0      |
| Females 30 - 34                             | 6      | 2      | 6      | 5      | 2      |
| Females 35 - 39                             | 6      | 5      | 4      | 4      | 6      |
| Females 40 - 44                             | 24     | 12     | 12     | 18     | 10     |
| Females 45 - 49                             | 37     | 26     | 30     | 38     | 37     |
| Females 50 - 54                             | 55     | 46     | 46     | 60     | 61     |
| Females 55 - 59                             | 105    | 103    | 103    | 101    | 112    |
| Females 60 - 64                             | 194    | 194    | 184    | 206    | 186    |
| Females 65 - 69                             | 340    | 305    | 297    | 322    | 310    |
| Females 70 - 74                             | 518    | 519    | 466    | 566    | 503    |
| Females 75 - 79                             | 813    | 934    | 818    | 863    | 785    |
| Females 80 - 84                             | 1,363  | 1,294  | 1,284  | 1,362  | 1,270  |
| Females 85 - 89                             | 1,410  | 1,551  | 1,588  | 1,541  | 1,458  |
| Females 90 - 94                             | 1,017  | 955    | 936    | 1,055  | 1,019  |
| Females 95 - 99                             | 425    | 409    | 392    | 410    | 430    |
| Females 100+                                | 67     | 73     | 64     | 73     | 89     |
| Males 0 - 4                                 | 0      | 0      | 0      | 0      | 1      |
| Males 5 - 9                                 | 0      | 0      | 0      | 0      | 0      |
| Males 10 - 14                               | 1      | 1      | 0      | 0      | 2      |
| Males 15 - 19                               | 2      | 1      | 1      | 0      | 0      |
| Males 20 - 24                               | 3      | 1      | 1      | 0      | 1      |
| Males 25 - 29                               | 1      | 2      | 0      | 0      | 1      |
| Males 30 - 34                               | 2      | 4      | 0      | 7      | 5      |
| Males 35 - 39                               | 14     | 8      | 4      | 10     | 3      |
| Males 40 - 44                               | 9      | 12     | 18     | 19     | 18     |
| Males 45 - 49                               | 35     | 41     | 31     | 31     | 31     |
| Males 50 - 54                               | 68     | 72     | 73     | 69     | 63     |
| Males 55 - 59                               | 151    | 147    | 154    | 128    | 114    |
| Males 60 - 64                               | 282    | 263    | 264    | 287    | 259    |
| Males 65 - 69                               | 467    | 497    | 438    | 448    | 464    |
| Males 70 - 74                               | 732    | 686    | 739    | 678    | 733    |
| Males 75 - 79                               | 1,053  | 931    | 1,002  | 1,003  | 956    |
| Males 80 - 84                               | 1,130  | 1,142  | 1,108  | 1,209  | 1,186  |
| Males 85 - 89                               | 870    | 875    | 1,009  | 932    | 1,014  |
| Males 90 - 94                               | 411    | 368    | 348    | 424    | 458    |
| Males 95 - 99                               | 92     | 111    | 109    | 135    | 118    |
| Males 100+                                  | 10     | 14     | 10     | 12     | 10     |
| <b>Deaths with More Than 1 Condition</b>    | 11,716 | 11,610 | 11,543 | 12,019 | 11,717 |
| <b>Percentage of All Deaths</b>             | 20.93% | 20.84% | 21.43% | 22.27% | 21.84% |
| <b>Percentage of Palliative Care Deaths</b> | 23.68% | 23.65% | 24.20% | 25.05% | 24.67% |

1  
2  
3  
4  
5  
6  
7  
8  
9  
10  
11  
12  
13  
14  
15  
16  
17  
18  
19  
20  
21  
22  
23  
24  
25  
26  
27  
28  
29  
30  
31  
32  
33  
34  
35  
36  
37  
38  
39  
40  
41  
42  
43  
44  
45  
46  
47  
48  
49  
50  
51  
52  
53  
54  
55  
56  
57  
58  
59  
60

**(underlying and contributory causes)**

For peer review only

1  
2  
3  
4  
5  
6  
7  
8  
9  
10  
11  
12  
13  
14  
15  
16  
17  
18  
19  
20  
21  
22  
23  
24  
25  
26  
27  
28  
29  
30  
31  
32  
33  
34  
35  
36  
37  
38  
39  
40  
41  
42  
43  
44  
45  
46  
47  
48  
49  
50  
51  
52  
53  
54  
55  
56  
57  
58  
59  
60

For peer review only

1  
2  
3  
4  
5  
6  
7  
8  
9  
10  
11  
12  
13  
14  
15  
16  
17  
18  
19  
20  
21  
22  
23  
24  
25  
26  
27  
28  
29  
30  
31  
32  
33  
34  
35  
36  
37  
38  
39  
40  
41  
42  
43  
44  
45  
46  
47  
48  
49  
50  
51  
52  
53  
54  
55  
56  
57  
58  
59  
60

| Baseline |        |        |        |        |        |        |        |        |  |  |
|----------|--------|--------|--------|--------|--------|--------|--------|--------|--|--|
| 2012     | 2013   | 2014   | 2015   | 2016   | 2017   | 2018   | 2019   | 2020   |  |  |
| 1        | 1      | 0      | 0      | 0      | 1      | 1      | 1      | 1      |  |  |
| 1        | 0      | 0      | 0      | 0      | 0      | 0      | 0      | 0      |  |  |
| 0        | 1      | 0      | 0      | 1      | 1      | 1      | 1      | 1      |  |  |
| 0        | 2      | 0      | 1      | 1      | 0      | 0      | 0      | 0      |  |  |
| 0        | 0      | 1      | 0      | 2      | 0      | 0      | 0      | 0      |  |  |
| 1        | 4      | 2      | 2      | 2      | 2      | 3      | 3      | 3      |  |  |
| 0        | 1      | 2      | 4      | 2      | 5      | 6      | 6      | 6      |  |  |
| 6        | 9      | 3      | 8      | 8      | 8      | 7      | 7      | 7      |  |  |
| 13       | 10     | 10     | 13     | 20     | 13     | 10     | 9      | 9      |  |  |
| 32       | 23     | 26     | 35     | 33     | 35     | 36     | 34     | 33     |  |  |
| 67       | 54     | 61     | 70     | 73     | 75     | 74     | 74     | 73     |  |  |
| 94       | 109    | 116    | 110    | 120    | 133    | 134    | 136    | 139    |  |  |
| 197      | 198    | 176    | 220    | 212    | 222    | 217    | 223    | 228    |  |  |
| 301      | 318    | 326    | 403    | 377    | 377    | 369    | 365    | 365    |  |  |
| 551      | 549    | 535    | 635    | 639    | 626    | 677    | 701    | 727    |  |  |
| 917      | 919    | 894    | 999    | 1,051  | 1,038  | 1,025  | 1,053  | 1,076  |  |  |
| 1,290    | 1,348  | 1,297  | 1,506  | 1,469  | 1,551  | 1,583  | 1,611  | 1,634  |  |  |
| 1,540    | 1,528  | 1,615  | 1,837  | 1,894  | 2,035  | 2,038  | 2,100  | 2,160  |  |  |
| 1,177    | 1,159  | 1,250  | 1,547  | 1,412  | 1,567  | 1,502  | 1,550  | 1,605  |  |  |
| 441      | 411    | 412    | 572    | 570    | 623    | 594    | 619    | 623    |  |  |
| 75       | 70     | 97     | 98     | 88     | 84     | 75     | 73     | 86     |  |  |
| 1        | 0      | 0      | 0      | 1      | 0      | 0      | 0      | 0      |  |  |
| 0        | 0      | 0      | 0      | 0      | 0      | 0      | 0      | 0      |  |  |
| 0        | 1      | 0      | 1      | 0      | 0      | 0      | 0      | 0      |  |  |
| 0        | 1      | 1      | 4      | 0      | 1      | 1      | 1      | 1      |  |  |
| 0        | 1      | 0      | 0      | 0      | 0      | 0      | 0      | 0      |  |  |
| 0        | 1      | 1      | 1      | 4      | 4      | 4      | 4      | 4      |  |  |
| 6        | 2      | 2      | 4      | 3      | 3      | 3      | 3      | 3      |  |  |
| 6        | 5      | 6      | 10     | 4      | 12     | 11     | 11     | 11     |  |  |
| 9        | 8      | 12     | 18     | 13     | 13     | 12     | 13     | 13     |  |  |
| 30       | 31     | 23     | 31     | 44     | 40     | 33     | 31     | 30     |  |  |
| 65       | 64     | 50     | 87     | 93     | 91     | 84     | 84     | 83     |  |  |
| 142      | 146    | 132    | 159    | 184    | 153    | 156    | 157    | 158    |  |  |
| 279      | 249    | 281    | 309    | 354    | 313    | 310    | 316    | 324    |  |  |
| 459      | 483    | 481    | 627    | 595    | 534    | 519    | 509    | 504    |  |  |
| 688      | 724    | 716    | 864    | 839    | 921    | 1,002  | 1,037  | 1,078  |  |  |
| 979      | 1,005  | 1,031  | 1,138  | 1,152  | 1,225  | 1,175  | 1,208  | 1,233  |  |  |
| 1,193    | 1,193  | 1,282  | 1,500  | 1,518  | 1,595  | 1,585  | 1,637  | 1,678  |  |  |
| 1,036    | 1,078  | 1,170  | 1,287  | 1,305  | 1,390  | 1,397  | 1,450  | 1,511  |  |  |
| 555      | 563    | 599    | 752    | 744    | 799    | 766    | 801    | 837    |  |  |
| 109      | 111    | 125    | 170    | 180    | 206    | 195    | 217    | 231    |  |  |
| 11       | 13     | 17     | 16     | 17     | 29     | 19     | 19     | 23     |  |  |
| 12,272   | 12,393 | 12,752 | 15,038 | 15,024 | 15,725 | 15,623 | 16,061 | 16,497 |  |  |
| 22.34%   | 22.66% | 23.51% | 26.12% | 26.49% | 27.17% | 27.82% | 28.48% | 29.13% |  |  |
| 25.14%   | 25.43% | 26.34% | 29.14% | 29.59% | 30.15% | 30.76% | 31.43% | 32.07% |  |  |

1  
2  
3  
4  
5  
6  
7  
8  
9  
10  
11  
12  
13  
14  
15  
16  
17  
18  
19  
20  
21  
22  
23  
24  
25  
26  
27  
28  
29  
30  
31  
32  
33  
34  
35  
36  
37  
38  
39  
40  
41  
42  
43  
44  
45  
46  
47  
48  
49  
50  
51  
52  
53  
54  
55  
56  
57  
58  
59  
60

For peer review only

1  
2  
3  
4  
5  
6  
7  
8  
9  
10  
11  
12  
13  
14  
15  
16  
17  
18  
19  
20  
21  
22  
23  
24  
25  
26  
27  
28  
29  
30  
31  
32  
33  
34  
35  
36  
37  
38  
39  
40  
41  
42  
43  
44  
45  
46  
47  
48  
49  
50  
51  
52  
53  
54  
55  
56  
57  
58  
59  
60

For peer review only

1  
2  
3  
4  
5  
6  
7  
8  
9  
10  
11  
12  
13  
14  
15  
16  
17  
18  
19  
20  
21  
22  
23  
24  
25  
26  
27  
28  
29  
30  
31  
32  
33  
34  
35  
36  
37  
38  
39  
40  
41  
42  
43  
44  
45  
46  
47  
48  
49  
50  
51  
52  
53  
54  
55  
56  
57  
58  
59  
60

## Projected

| 2021   | 2022   | 2023   | 2024   | 2025   | 2026   | 2027   | 2028   | 2029   |
|--------|--------|--------|--------|--------|--------|--------|--------|--------|
| 1      | 2      | 2      | 2      | 2      | 2      | 2      | 2      | 2      |
| 0      | 0      | 0      | 0      | 0      | 0      | 0      | 0      | 0      |
| 1      | 1      | 1      | 1      | 1      | 1      | 1      | 1      | 1      |
| 0      | 0      | 0      | 0      | 0      | 0      | 0      | 0      | 0      |
| 0      | 0      | 0      | 0      | 0      | 0      | 0      | 0      | 0      |
| 3      | 3      | 3      | 3      | 3      | 3      | 3      | 3      | 3      |
| 6      | 5      | 5      | 5      | 5      | 5      | 5      | 5      | 4      |
| 7      | 7      | 7      | 8      | 8      | 8      | 8      | 8      | 8      |
| 8      | 7      | 7      | 6      | 5      | 5      | 4      | 3      | 2      |
| 32     | 30     | 29     | 30     | 30     | 30     | 31     | 32     | 33     |
| 73     | 72     | 70     | 68     | 66     | 64     | 61     | 60     | 60     |
| 140    | 141    | 140    | 139    | 137    | 136    | 134    | 130    | 126    |
| 234    | 240    | 245    | 250    | 256    | 258    | 260    | 259    | 258    |
| 368    | 375    | 382    | 390    | 401    | 411    | 419    | 427    | 434    |
| 749    | 720    | 710    | 709    | 715    | 727    | 746    | 765    | 787    |
| 1,116  | 1,206  | 1,263  | 1,313  | 1,367  | 1,414  | 1,365  | 1,353  | 1,356  |
| 1,640  | 1,658  | 1,691  | 1,728  | 1,758  | 1,813  | 1,953  | 2,041  | 2,114  |
| 2,218  | 2,273  | 2,349  | 2,415  | 2,474  | 2,507  | 2,559  | 2,640  | 2,725  |
| 1,661  | 1,730  | 1,783  | 1,838  | 1,895  | 1,958  | 2,019  | 2,095  | 2,163  |
| 639    | 650    | 664    | 685    | 709    | 738    | 772    | 796    | 826    |
| 92     | 97     | 98     | 101    | 103    | 108    | 109    | 112    | 117    |
| 0      | 0      | 0      | 0      | 0      | 0      | 0      | 0      | 0      |
| 0      | 0      | 0      | 0      | 0      | 0      | 0      | 0      | 0      |
| 0      | 0      | 0      | 0      | 0      | 0      | 0      | 0      | 0      |
| 1      | 1      | 1      | 1      | 1      | 1      | 1      | 1      | 1      |
| 0      | 0      | 0      | 0      | 0      | 0      | 0      | 0      | 0      |
| 4      | 4      | 4      | 4      | 4      | 4      | 4      | 4      | 4      |
| 3      | 3      | 3      | 3      | 3      | 3      | 3      | 3      | 3      |
| 11     | 11     | 11     | 11     | 11     | 11     | 11     | 11     | 10     |
| 14     | 15     | 15     | 16     | 17     | 17     | 18     | 18     | 19     |
| 29     | 28     | 27     | 27     | 27     | 27     | 28     | 28     | 28     |
| 82     | 81     | 80     | 78     | 76     | 74     | 72     | 70     | 71     |
| 157    | 155    | 153    | 151    | 146    | 144    | 140    | 135    | 130    |
| 331    | 338    | 345    | 350    | 356    | 358    | 358    | 357    | 354    |
| 504    | 510    | 515    | 522    | 533    | 543    | 551    | 558    | 563    |
| 1,107  | 1,063  | 1,047  | 1,043  | 1,049  | 1,068  | 1,096  | 1,122  | 1,152  |
| 1,284  | 1,394  | 1,464  | 1,511  | 1,566  | 1,602  | 1,538  | 1,512  | 1,506  |
| 1,701  | 1,745  | 1,794  | 1,866  | 1,924  | 2,025  | 2,226  | 2,362  | 2,464  |
| 1,563  | 1,609  | 1,676  | 1,737  | 1,785  | 1,813  | 1,864  | 1,929  | 2,019  |
| 883    | 941    | 995    | 1,044  | 1,101  | 1,156  | 1,205  | 1,273  | 1,335  |
| 247    | 259    | 270    | 288    | 307    | 331    | 359    | 385    | 412    |
| 27     | 30     | 32     | 34     | 37     | 40     | 42     | 44     | 48     |
| 16,936 | 17,404 | 17,883 | 18,376 | 18,880 | 19,404 | 19,966 | 20,545 | 21,139 |
| 29.77% | 30.45% | 31.13% | 31.81% | 32.48% | 33.15% | 33.89% | 34.62% | 35.34% |
| 32.71% | 33.39% | 34.06% | 34.73% | 35.39% | 36.03% | 36.74% | 37.44% | 38.13% |



1  
2  
3  
4  
5  
6  
7  
8  
9  
10  
11  
12  
13  
14  
15  
16  
17  
18  
19  
20  
21  
22  
23  
24  
25  
26  
27  
28  
29  
30  
31  
32  
33  
34  
35  
36  
37  
38  
39  
40  
41  
42  
43  
44  
45  
46  
47  
48  
49  
50  
51  
52  
53  
54  
55  
56  
57  
58  
59  
60

For peer review only

1  
2  
3  
4  
5  
6  
7  
8  
9  
10  
11  
12  
13  
14  
15  
16  
17  
18  
19  
20  
21  
22  
23  
24  
25  
26  
27  
28  
29  
30  
31  
32  
33  
34  
35  
36  
37  
38  
39  
40  
41  
42  
43  
44  
45  
46  
47  
48  
49  
50  
51  
52  
53  
54  
55  
56  
57  
58  
59  
60

For peer review only

|    | 2030   | 2031   | 2032   | 2033   | 2034   | 2035   | 2036   | 2037   | 2038   |
|----|--------|--------|--------|--------|--------|--------|--------|--------|--------|
| 1  |        |        |        |        |        |        |        |        |        |
| 2  |        |        |        |        |        |        |        |        |        |
| 3  |        |        |        |        |        |        |        |        |        |
| 4  |        |        |        |        |        |        |        |        |        |
| 5  | 2      | 2      | 2      | 2      | 2      | 2      | 2      | 2      | 2      |
| 6  | 0      | 0      | 0      | 0      | 0      | 0      | 0      | 0      | 0      |
| 7  | 1      | 1      | 1      | 1      | 1      | 1      | 1      | 1      | 1      |
| 8  | 0      | 0      | 0      | 0      | 0      | 0      | 0      | 0      | 0      |
| 9  | 0      | 0      | 0      | 0      | 0      | 0      | 0      | 0      | 0      |
| 10 | 0      | 0      | 0      | 0      | 0      | 0      | 0      | 0      | 0      |
| 11 | 3      | 3      | 3      | 3      | 4      | 4      | 4      | 4      | 4      |
| 12 | 4      | 4      | 3      | 3      | 3      | 3      | 3      | 3      | 3      |
| 13 | 4      | 4      | 3      | 3      | 3      | 3      | 3      | 3      | 3      |
| 14 | 8      | 8      | 8      | 8      | 8      | 8      | 8      | 7      | 7      |
| 15 | 2      | 1      | 0      | 0      | 0      | 0      | 0      | 0      | 0      |
| 16 | 33     | 33     | 33     | 33     | 34     | 34     | 35     | 35     | 35     |
| 17 | 61     | 62     | 65     | 67     | 68     | 69     | 70     | 70     | 71     |
| 18 | 122    | 117    | 112    | 109    | 109    | 110    | 113    | 117    | 120    |
| 19 | 254    | 253    | 249    | 243    | 234    | 228    | 218    | 209    | 205    |
| 20 | 443    | 446    | 447    | 445    | 441    | 433    | 429    | 423    | 411    |
| 21 | 809    | 831    | 853    | 875    | 894    | 916    | 926    | 933    | 934    |
| 22 | 1,374  | 1,402  | 1,445  | 1,489  | 1,539  | 1,587  | 1,637  | 1,686  | 1,734  |
| 23 | 2,193  | 2,258  | 2,177  | 2,155  | 2,158  | 2,183  | 2,227  | 2,293  | 2,361  |
| 24 | 2,797  | 2,907  | 3,173  | 3,348  | 3,497  | 3,646  | 3,772  | 3,675  | 3,675  |
| 25 | 2,226  | 2,263  | 2,323  | 2,416  | 2,512  | 2,590  | 2,700  | 2,991  | 3,179  |
| 26 | 860    | 899    | 939    | 982    | 1,023  | 1,063  | 1,088  | 1,129  | 1,191  |
| 27 | 123    | 131    | 138    | 144    | 153    | 163    | 175    | 186    | 198    |
| 28 |        |        |        |        |        |        |        |        |        |
| 29 |        |        |        |        |        |        |        |        |        |
| 30 |        |        |        |        |        |        |        |        |        |
| 31 |        |        |        |        |        |        |        |        |        |
| 32 | 0      | 0      | 0      | 0      | 0      | 0      | 0      | 0      | 0      |
| 33 | 0      | 0      | 0      | 0      | 0      | 0      | 0      | 0      | 0      |
| 34 | 0      | 0      | 0      | 0      | 0      | 0      | 0      | 0      | 0      |
| 35 | 1      | 1      | 1      | 1      | 1      | 1      | 1      | 1      | 1      |
| 36 | 0      | 0      | 0      | 0      | 0      | 0      | 0      | 0      | 0      |
| 37 | 4      | 4      | 4      | 5      | 5      | 5      | 5      | 5      | 5      |
| 38 | 3      | 3      | 3      | 3      | 3      | 3      | 3      | 3      | 3      |
| 39 | 10     | 10     | 10     | 9      | 9      | 9      | 8      | 8      | 7      |
| 40 | 20     | 21     | 21     | 22     | 22     | 22     | 22     | 22     | 22     |
| 41 | 28     | 28     | 28     | 29     | 29     | 29     | 30     | 30     | 30     |
| 42 | 72     | 73     | 76     | 78     | 80     | 81     | 82     | 83     | 85     |
| 43 | 126    | 121    | 116    | 113    | 113    | 114    | 115    | 118    | 121    |
| 44 | 348    | 344    | 338    | 331    | 321    | 313    | 303    | 294    | 287    |
| 45 | 569    | 569    | 566    | 560    | 553    | 539    | 532    | 519    | 504    |
| 46 | 1,186  | 1,218  | 1,250  | 1,282  | 1,309  | 1,338  | 1,350  | 1,358  | 1,357  |
| 47 | 1,513  | 1,537  | 1,577  | 1,614  | 1,656  | 1,704  | 1,747  | 1,792  | 1,837  |
| 48 | 2,579  | 2,664  | 2,584  | 2,569  | 2,584  | 2,621  | 2,689  | 2,785  | 2,877  |
| 49 | 2,090  | 2,204  | 2,443  | 2,606  | 2,726  | 2,848  | 2,933  | 2,865  | 2,865  |
| 50 | 1,388  | 1,423  | 1,480  | 1,554  | 1,650  | 1,725  | 1,835  | 2,072  | 2,233  |
| 51 | 443    | 473    | 504    | 543    | 580    | 613    | 635    | 673    | 723    |
| 52 | 52     | 57     | 63     | 68     | 74     | 81     | 87     | 95     | 105    |
| 53 |        |        |        |        |        |        |        |        |        |
| 54 |        |        |        |        |        |        |        |        |        |
| 55 |        |        |        |        |        |        |        |        |        |
| 56 |        |        |        |        |        |        |        |        |        |
| 57 |        |        |        |        |        |        |        |        |        |
| 58 | 21,746 | 22,371 | 23,034 | 23,710 | 24,395 | 25,084 | 25,785 | 26,487 | 27,196 |
| 59 | 36.06% | 36.78% | 37.54% | 38.29% | 39.04% | 39.79% | 40.55% | 41.29% | 42.03% |
| 60 | 38.81% | 39.49% | 40.21% | 40.91% | 41.60% | 42.29% | 42.98% | 43.63% | 44.29% |

1  
2  
3  
4  
5  
6  
7  
8  
9  
10  
11  
12  
13  
14  
15  
16  
17  
18  
19  
20  
21  
22  
23  
24  
25  
26  
27  
28  
29  
30  
31  
32  
33  
34  
35  
36  
37  
38  
39  
40  
41  
42  
43  
44  
45  
46  
47  
48  
49  
50  
51  
52  
53  
54  
55  
56  
57  
58  
59  
60

For peer review only

1  
2  
3  
4  
5  
6  
7  
8  
9  
10  
11  
12  
13  
14  
15  
16  
17  
18  
19  
20  
21  
22  
23  
24  
25  
26  
27  
28  
29  
30  
31  
32  
33  
34  
35  
36  
37  
38  
39  
40  
41  
42  
43  
44  
45  
46  
47  
48  
49  
50  
51  
52  
53  
54  
55  
56  
57  
58  
59  
60

For peer review only

|    | <b>2039</b> | <b>2040</b> |
|----|-------------|-------------|
| 1  |             |             |
| 2  |             |             |
| 3  |             |             |
| 4  |             |             |
| 5  | 2           | 2           |
| 6  | 0           | 0           |
| 7  | 2           | 1           |
| 8  | 0           | 0           |
| 9  | 0           | 0           |
| 10 | 0           | 0           |
| 11 | 4           | 4           |
| 12 | 3           | 3           |
| 13 | 7           | 7           |
| 14 | 0           | 0           |
| 15 | 35          | 35          |
| 16 | 73          | 74          |
| 17 | 122         | 124         |
| 18 | 205         | 208         |
| 19 | 396         | 384         |
| 20 | 930         | 918         |
| 21 | 1,778       | 1,826       |
| 22 | 2,437       | 2,511       |
| 23 | 3,717       | 3,796       |
| 24 | 3,327       | 3,460       |
| 25 | 1,254       | 1,304       |
| 26 | 210         | 223         |
| 27 |             |             |
| 28 | 0           | 0           |
| 29 | 0           | 0           |
| 30 | 0           | 0           |
| 31 | 1           | 1           |
| 32 | 0           | 0           |
| 33 | 5           | 5           |
| 34 | 3           | 3           |
| 35 | 7           | 7           |
| 36 | 22          | 22          |
| 37 | 30          | 29          |
| 38 | 87          | 89          |
| 39 | 122         | 123         |
| 40 | 288         | 293         |
| 41 | 488         | 473         |
| 42 | 1,354       | 1,333       |
| 43 | 1,873       | 1,912       |
| 44 | 2,976       | 3,087       |
| 45 | 2,898       | 2,955       |
| 46 | 2,354       | 2,466       |
| 47 | 784         | 831         |
| 48 | 113         | 121         |
| 49 |             |             |
| 50 | 27,907      | 28,629      |
| 51 | 42.78%      | 43.54%      |
| 52 | 44.95%      | 45.62%      |

1  
2  
3  
4  
5  
6  
7  
8  
9  
10  
11  
12  
13  
14  
15  
16  
17  
18  
19  
20  
21  
22  
23  
24  
25  
26  
27  
28  
29  
30  
31  
32  
33  
34  
35  
36  
37  
38  
39  
40  
41  
42  
43  
44  
45  
46  
47  
48  
49  
50  
51  
52  
53  
54  
55  
56  
57  
58  
59  
60

For peer review only

1  
2  
3  
4  
5  
6  
7  
8  
9  
10  
11  
12  
13  
14  
15  
16  
17  
18  
19  
20  
21  
22  
23  
24  
25  
26  
27  
28  
29  
30  
31  
32  
33  
34  
35  
36  
37  
38  
39  
40  
41  
42  
43  
44  
45  
46  
47  
48  
49  
50  
51  
52  
53  
54  
55  
56  
57  
58  
59  
60

For peer review only



# BMJ Open

## How many people will need palliative care in Scotland by 2040? A mixed method study of projected palliative care need and recommendations for service delivery

|                                 |                                                                                                                                                                                                                                                                                                                                                                                                                                                                                                                                                                                                                                                                                                                                                                                                                                                                                                                                                                                                                                                                        |
|---------------------------------|------------------------------------------------------------------------------------------------------------------------------------------------------------------------------------------------------------------------------------------------------------------------------------------------------------------------------------------------------------------------------------------------------------------------------------------------------------------------------------------------------------------------------------------------------------------------------------------------------------------------------------------------------------------------------------------------------------------------------------------------------------------------------------------------------------------------------------------------------------------------------------------------------------------------------------------------------------------------------------------------------------------------------------------------------------------------|
| Journal:                        | <i>BMJ Open</i>                                                                                                                                                                                                                                                                                                                                                                                                                                                                                                                                                                                                                                                                                                                                                                                                                                                                                                                                                                                                                                                        |
| Manuscript ID                   | bmjopen-2020-041317.R1                                                                                                                                                                                                                                                                                                                                                                                                                                                                                                                                                                                                                                                                                                                                                                                                                                                                                                                                                                                                                                                 |
| Article Type:                   | Original research                                                                                                                                                                                                                                                                                                                                                                                                                                                                                                                                                                                                                                                                                                                                                                                                                                                                                                                                                                                                                                                      |
| Date Submitted by the Author:   | 08-Dec-2020                                                                                                                                                                                                                                                                                                                                                                                                                                                                                                                                                                                                                                                                                                                                                                                                                                                                                                                                                                                                                                                            |
| Complete List of Authors:       | Finucane, Anne; Marie Curie Hospice Edinburgh, Research; University of Edinburgh, Primary Palliative Care Research Group, Usher Institute<br>Bone, Anna; King's College London, Cicely Saunders Institute of Palliative Care, Policy and Rehabilitation<br>Etkind, Simon ; King's College London, Cicely Saunders Institute of Palliative Care, Policy and Rehabilitation<br>Carr, David; Public Health Scotland<br>Meade, Richard; Marie Curie, Policy and Public Affairs<br>Munoz-arroyo, Rosalia; Public Health Scotland<br>Moine, Sébastien ; Université Paris, Health Education; University of Edinburgh, Primary Palliative Care Research Group, Usher Institute<br>Iyayi-igbinovia, Aghimien; Public Health Scotland<br>Evans, Catherine ; King's College London, Cicely Saunders Institute of Palliative Care, Policy and Rehabilitation<br>Higginson, Irene; Kings College London, Cicely Saunders Institute of Palliative Care, Policy and Rehabilitation<br>Murray, Scott; University of Edinburgh, Primary Palliative Care Research Group, Usher Institute |
| <b>Primary Subject Heading</b>: | Palliative care                                                                                                                                                                                                                                                                                                                                                                                                                                                                                                                                                                                                                                                                                                                                                                                                                                                                                                                                                                                                                                                        |
| Secondary Subject Heading:      | Public health                                                                                                                                                                                                                                                                                                                                                                                                                                                                                                                                                                                                                                                                                                                                                                                                                                                                                                                                                                                                                                                          |
| Keywords:                       | Adult palliative care < PALLIATIVE CARE, PUBLIC HEALTH, Health policy < HEALTH SERVICES ADMINISTRATION & MANAGEMENT, GERIATRIC MEDICINE, Dementia < NEUROLOGY                                                                                                                                                                                                                                                                                                                                                                                                                                                                                                                                                                                                                                                                                                                                                                                                                                                                                                          |
|                                 |                                                                                                                                                                                                                                                                                                                                                                                                                                                                                                                                                                                                                                                                                                                                                                                                                                                                                                                                                                                                                                                                        |

SCHOLARONE™  
Manuscripts

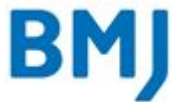

I, the Submitting Author has the right to grant and does grant on behalf of all authors of the Work (as defined in the below author licence), an exclusive licence and/or a non-exclusive licence for contributions from authors who are: i) UK Crown employees; ii) where BMJ has agreed a CC-BY licence shall apply, and/or iii) in accordance with the terms applicable for US Federal Government officers or employees acting as part of their official duties; on a worldwide, perpetual, irrevocable, royalty-free basis to BMJ Publishing Group Ltd ("BMJ") its licensees and where the relevant Journal is co-owned by BMJ to the co-owners of the Journal, to publish the Work in this journal and any other BMJ products and to exploit all rights, as set out in our [licence](#).

The Submitting Author accepts and understands that any supply made under these terms is made by BMJ to the Submitting Author unless you are acting as an employee on behalf of your employer or a postgraduate student of an affiliated institution which is paying any applicable article publishing charge ("APC") for Open Access articles. Where the Submitting Author wishes to make the Work available on an Open Access basis (and intends to pay the relevant APC), the terms of reuse of such Open Access shall be governed by a Creative Commons licence – details of these licences and which [Creative Commons](#) licence will apply to this Work are set out in our licence referred to above.

Other than as permitted in any relevant BMJ Author's Self Archiving Policies, I confirm this Work has not been accepted for publication elsewhere, is not being considered for publication elsewhere and does not duplicate material already published. I confirm all authors consent to publication of this Work and authorise the granting of this licence.

1  
2  
3 **How many people will need palliative care in Scotland by 2040? A mixed**  
4 **method study of projected palliative care need and recommendations for**  
5 **service delivery**  
6  
7

8 **Authors**  
9

10 Anne M. Finucane

11 Research Lead

12 Marie Curie Hospice Edinburgh,

13 45 Frogston Road West,

14 Scotland,

15 UK.

16 Second affiliation: Usher Institute, University of Edinburgh, Scotland, UK.

17 Email: [Anne.finucane@mariecurie.org.uk](mailto:Anne.finucane@mariecurie.org.uk)  
18  
19

20  
21  
22 Anna E. Bone

23 Research Associate

24 King's College London,

25 Cicely Saunders Institute of Palliative Care, Policy and Rehabilitation,

26 Bessemer Road, Denmark Hill,

27 London SE5 9PJ,

28 UK

29 Email: [anna.bone@kcl.ac.uk](mailto:anna.bone@kcl.ac.uk)  
30  
31

32  
33  
34 Simon Etkind

35 Visiting Researcher

36 King's College London,

37 Cicely Saunders Institute of Palliative Care, Policy and Rehabilitation,

38 Bessemer Road, Denmark Hill,

39 London SE5 9PJ,

40 UK

41 Email: [simon.etkind@kcl.ac.uk](mailto:simon.etkind@kcl.ac.uk)  
42

43 Second affiliation: Specialist registrar in palliative medicine, Guy's and St Thomas' NHS  
44 Foundation Trust, London, UK  
45  
46

47  
48 David Carr

49 Senior Information Analyst

50 Public Health Scotland

51 Meridian Court,

52 5 Cadogan Street,

53 Glasgow G2 6QE

54 Scotland, UK

55 E-mail: [david.carr2@phs.scot](mailto:david.carr2@phs.scot)  
56  
57  
58  
59  
60

1  
2  
3 Richard Meade  
4 Head of Policy and Public Affairs for Scotland  
5  
6 Marie Curie,  
7 Edinburgh,  
8 Scotland,  
9  
10 UK  
11 Email: [Richard.Meade@mariecurie.org.uk](mailto:Richard.Meade@mariecurie.org.uk)  
12

13 Rosalia Munoz-Arroyo,  
14 Principal Information Analyst  
15 Public Health Scotland  
16 Meridian Court,  
17 5 Cadogan Street,  
18 Glasgow G2 6QE  
19 Scotland, UK  
20  
21 Email: [rosalia.munoz-arroyo@phs.scot](mailto:rosalia.munoz-arroyo@phs.scot)  
22

23  
24 Sebastien Moine  
25 Visiting Fellow,  
26 Usher Institute,  
27 University of Edinburgh,  
28 Scotland, UK  
29  
30 Email: [sebastien.moine.75@gmail.com](mailto:sebastien.moine.75@gmail.com)  
31

32  
33 Aghimien Iyayi-Igbinovia,  
34 Principal Information Analyst  
35 Public Health Scotland  
36 Meridian Court,  
37 5 Cadogan Street,  
38 Glasgow G2 6QE  
39 Scotland, UK  
40  
41 Email: [aghimien.iyayi-igbinovia@phs.scot](mailto:aghimien.iyayi-igbinovia@phs.scot)  
42

43  
44 Catherine J. Evans  
45 HEE/NIHR Senior Clinical Lecturer in Palliative Care,  
46 King's College London,  
47 Cicely Saunders Institute of Palliative Care, Policy and Rehabilitation,  
48 Bessemer Road, Denmark Hill,  
49 London SE5 9PJ,  
50  
51 UK  
52  
53 Email: [Catherine.evans@kcl.ac.uk](mailto:Catherine.evans@kcl.ac.uk)  
54  
55  
56  
57  
58  
59  
60

1  
2  
3 Irene J. Higginson  
4 Professor of Palliative Care  
5 King's College London,  
6 Cicely Saunders Institute of Palliative Care, Policy and Rehabilitation,  
7 Bessemer Road, Denmark Hill,  
8 London SE5 9PJ,  
9 UK  
10 Email: irene.higginson@kcl.ac.uk  
11  
12  
13  
14

15 Scott A. Murray  
16 Emeritus Professor of Primary Palliative Care  
17 Usher Institute,  
18 University of Edinburgh,  
19 Scotland,  
20 UK  
21 Email: scott.murray@ed.ac.uk  
22  
23  
24  
25  
26  
27

28 **Corresponding author: Anne M. Finucane.**

29 Email: [Anne.finucane@mariecurie.org.uk](mailto:Anne.finucane@mariecurie.org.uk)  
30  
31  
32  
33  
34  
35  
36  
37  
38  
39  
40  
41  
42  
43  
44  
45  
46  
47  
48  
49  
50  
51  
52  
53  
54  
55  
56  
57  
58  
59  
60

## Abstract

### Objective

To estimate future palliative care need and complexity of need in Scotland, and to identify priorities for future service delivery.

### Design

We estimated the prevalence of palliative care need by analysing the proportion of deaths from defined chronic progressive illnesses. We described linear projections up to 2040 using national death registry data and official mortality forecasts. An expert consultation and subsequent online consensus survey generated recommendations on meeting future palliative care need.

### Setting

Scotland, population of 5.4m.

### Participants

All decedents in Scotland over 11 years (2007-2017). The consultation had 34 participants; 24 completed the consensus survey.

### Primary and secondary outcomes

Estimates of past and future palliative care need in Scotland from 2007 up to 2040.

Multimorbidity was operationalised as two or more registered causes of death from different disease groups (cancer, organ failure, dementia, other). Consultation and survey data were analysed descriptively.

### Results

We project that by 2040, the number of people requiring palliative care will increase by at least 14%; and by 20% if we factor in multimorbidity. The number of people dying from

1  
2  
3 multiple diseases associated with different disease groups is projected to increase from 27%  
4  
5 of all deaths in 2017 to 43% by 2040. To address increased need and complexity, experts  
6  
7 prioritised sustained investment in a national digital platform, roll-out of integrated electronic  
8  
9 health and social care records; and approaches that remain person-centred.  
10  
11  
12  
13  
14

## 15 **Conclusions**

16  
17 By 2040 more people in Scotland are projected to die with palliative care needs, and the  
18  
19 complexity of need will increase markedly. Service delivery models must adapt to serve  
20  
21 growing demand and complexity associated with dying from multiple diseases from different  
22  
23 disease groups. We need sustained investment in secure, accessible, integrated and person-  
24  
25 centred health and social care digital systems, to improve care co-ordination and optimise  
26  
27 palliative care for people across care settings.  
28  
29  
30  
31  
32  
33  
34

## 35 **Keywords**

36  
37 Forecasting, multimorbidity, palliative care, needs assessment, chronic disease, aging, frailty,  
38  
39 health policy  
40  
41  
42  
43  
44  
45  
46  
47  
48  
49  
50  
51  
52  
53  
54  
55  
56  
57  
58  
59  
60

### Strengths and limitations of this study

- First study to project estimates of future palliative care need for Scotland.
- Used a range of estimation methods accounting for both underlying and contributory causes of deaths to produce robust projections.
- The expert consultation and consensus survey ensured that recommendations were grounded in practice.
- We drew on death registry data that relies on accurate completion of death certificates.
- Our definition of multimorbidity was relatively restrictive – decedents were required to have two major illnesses from different disease groups both of which would individually confer palliative care need.



## Background

Worldwide, deaths are expected to rise from 55 million in 2016 to 75 million by 2040<sup>1</sup>. Non-communicable diseases accounted for 72% of global deaths in 2016, and are forecast to account for 81% of deaths by 2040.<sup>1</sup> Globally, the proportion of people aged 80 or over increased by 76.5% between 2000 and 2015.<sup>2</sup> The growing number of older people and increased prevalence of chronic conditions indicate that more people would benefit from a palliative approach to care over the next two decades.

Demographic changes and shifts in disease patterns at a national level will impact population palliative care need. An analysis based on data from 2006 to 2014 in England and Wales projected that up to 87.6% of people who die could benefit from palliative care by 2040.<sup>3</sup> In Ireland, a similar analysis based on data from 2007 to 2015 projected that palliative care need will increase, and will be indicated for 83% of those who die by 2046.<sup>4</sup> However, existing projection studies use data based on 'main underlying cause of death' only, excluding people who may have had a contributory cause of death (but not a main underlying cause) associated with palliative care need. For instance, population palliative care need estimates using 'main underlying cause of death' would only include people who died from Alzheimer's disease when it is listed as the 'main underlying cause' on their death certificate. Models that use data on 'main underlying cause of death' may therefore underestimate the true extent of population palliative care need; models that incorporate both main underlying and contributory causes of death are required.

Increased longevity in developed and developing countries comes with greater multimorbidity. Multimorbidity describes the co-existence of two or more chronic conditions which may be a physical non-communicable disease, a mental health condition or infectious

1  
2  
3 disease of long duration.<sup>5 6</sup> Data from Scotland has shown that 65% of people aged 65 to 84  
4  
5 years have two or more long term disorders; rising to 81.5% for people aged 85 and over.<sup>7</sup>  
6  
7 Only 5.3% of people with dementia have no other long term disorder.<sup>8</sup> Despite the  
8  
9 recognition that multimorbidity is the norm in high income countries,<sup>5</sup> there has been little  
10  
11 consideration of the implications for palliative care. To inform future palliative care service  
12  
13 design, there is a need to better understand multimorbidity due to the presence of advanced  
14  
15 progressive diseases. As a starting point, we need estimates of the number of people dying  
16  
17 from multiple diseases associated with palliative care need now and in the future.  
18  
19  
20  
21  
22  
23

24 The aim of this study was to estimate, and project future palliative care need and complexity  
25  
26 of need in Scotland up to 2040. Extending previous work, we sought to estimate and project  
27  
28 the number of people dying from more than one disease associated with palliative care need.  
29  
30 Furthermore, we planned an expert consultation and consensus survey to generate  
31  
32 recommendations for future palliative care service delivery. This novel analysis sought to  
33  
34 provide a more comprehensive picture of future palliative care need and complexity of need  
35  
36 than previously described.  
37  
38  
39  
40  
41  
42  
43  
44

## 45 **Methods**

### 46 47 48 **Design**

49  
50  
51 Mixed methods consisting of: i) simple linear modelling of routinely available national death  
52  
53 registry data and mortality projections for Scotland; ii) expert consultation and online  
54  
55 consensus survey to generate recommendations for service design and delivery based on our  
56  
57 projections.  
58  
59  
60

## Setting

Scotland, a high-income Western European country with a population of 5.4 million; 57,870 people died in 2017.<sup>9</sup> Mortality forecasts project that annual deaths will increase by 13.6% to 65,756 by 2040.<sup>10</sup>

## Data sources

**Deaths by age, gender and cause from 2007 to 2017.** We obtained aggregate level data on deaths by age, gender and cause for an 11-year period (2007-2017 inclusive) from Public Health Scotland (previously known as Information Services Division (ISD) Scotland). The aggregate data were derived from the National Records of Scotland (NRS) individual-level deaths database held by Public Health Scotland.

**Mortality projections** for Scotland are published by the Office for National Statistics.<sup>10</sup> The mortality projections used in this analysis were based on the 2016 principal population projections for Scotland up to 2040. We used projections up to 2040 to allow comparison with studies in other countries.

## Generating estimates of population palliative care need

Palliative care need at a population level has been estimated using a variety of methods. Gomez-Batiste et al. estimated that 75% of all those who die have palliative care needs.<sup>11</sup> Other approaches use disease specific mortality data and identify diseases using International Classification of Disease codes (ICD-10) that are associated with palliative care need to generate estimates.<sup>12 13</sup> Murtagh et al. estimated that in high income countries 63% to 97% of people who die might benefit from palliative care depending on the estimation method used.<sup>13</sup>

1  
2  
3 Based on this previous work, we estimated and projected palliative care need in three ways as  
4 described below.  
5  
6  
7  
8  
9

### 10 11 ***Estimation Method 1: 75% of all deaths*** 12

13  
14 Method 1 is based on that used by Gomez-Batiste et al.<sup>11</sup> It assumes that 75% of people in  
15 high-income countries die from chronic progressive diseases with evolving and increasing  
16 healthcare needs. Consequently, 75% of people at the end of life may benefit from a  
17 palliative care approach, irrespective of whether that is delivered by palliative care specialists  
18 or other health professionals. We calculated palliative care need as 75% of all deaths in  
19 2017, and projected this proportion up to 2040.  
20  
21  
22  
23  
24  
25  
26  
27  
28  
29  
30  
31

### 32 ***Estimation Method 2: Palliative care need based on ICD-10 codes associated with main*** 33 ***underlying cause of death*** 34 35 36

37 Method 2 takes a diagnosis-based approach, applying ICD-10 diagnostic codes previously  
38 used to estimate population palliative care need (Supplementary file 1).<sup>3 13</sup> To project future  
39 palliative care need, we modelled two scenarios (2A and 2B). For Method 2A we calculated  
40 the number and proportion of age and gender specific deaths in 2017 where an ICD-10 code  
41 associated with palliative care was recorded as the main underlying cause of death, then  
42 applied this proportion to mortality forecasts for each year up to 2040, with no adjustments.  
43 For Method 2B we calculated the mean annual change in the proportion of deaths requiring  
44 palliative care between 2007 and 2017. We assumed the mean annual change would continue  
45 in a linear fashion and applied the resulting proportion to mortality forecasts up to 2040. We  
46  
47  
48  
49  
50  
51  
52  
53  
54  
55  
56  
57  
58  
59  
60

1  
2  
3 chose Method 2B for sub-analyses projecting future needs by age and disease group as it  
4 enabled comparison with data reported in other published studies.<sup>3 4</sup>  
5  
6  
7  
8  
9

### 10 ***Estimation Method 3: Palliative care need based on ICD-10 codes associated with main*** 11 ***underlying and all contributory cause(s) of death*** 12 13 14

15  
16 Method 3 adopts a diagnostic based approach, using the same ICD-10 diagnostic codes  
17 outlined in Method 2 to estimate the number of people dying from diseases associated with  
18 palliative care need. However, for Method 3, our estimate of palliative care need was the  
19 number of people for whom a palliative care relevant disease was recorded as *either* the main  
20 underlying cause of death, or a contributory cause. Thus, Method 3 should yield the most  
21 accurate and comprehensive estimate of deaths associated with palliative care need in a  
22 calendar year. To project future need using this method we calculated the number and  
23 proportion of age and gender specific deaths from 2007 to 2017 where an ICD-10 code  
24 associated with palliative care was recorded as *either* the main underlying or contributory  
25 cause of death. As for Method 2B we assumed the mean annual change in the proportion  
26 of deaths associated with palliative care need over the baseline period would continue  
27 to occur in a linear fashion, and applied the resulting mean annual change to mortality  
28 forecasts up to 2040.  
29  
30  
31  
32  
33  
34  
35  
36  
37  
38  
39  
40  
41  
42  
43  
44  
45  
46  
47  
48  
49

### 50 **Defining, estimating, and projecting multimorbidity associated with advanced** 51 **progressive diseases** 52 53 54

55 We wanted to estimate and project the number of people dying from multimorbidity  
56 associated with palliative care need. Given that some diseases are closely related and may  
57  
58  
59  
60

1  
2  
3 represent similar disease processes (e.g. related cancers), we chose to define multimorbidity  
4 as people dying from two or more chronic diseases associated with palliative care need from  
5 more than one of four disease groups - cancer, organ failure, dementia or other (includes  
6 neurological conditions and stroke). This definition indicates care complexity, given the  
7 distinct illness trajectories, needs and configuration of services associated with diseases from  
8 each group, which when experienced together greatly increase symptom burden and need for  
9 care co-ordination. To generate this estimate we calculated the mean annual change in the  
10 proportion of deaths due to two or more diseases from different disease groups over the 11-  
11 year period. We assumed the mean annual change would continue to occur in a linear  
12 fashion and applied the resulting mean annual change in the proportion of deaths  
13 associated with diseases from different disease groups to mortality forecasts up to 2040.  
14  
15  
16  
17  
18  
19  
20  
21  
22  
23  
24  
25  
26  
27  
28  
29  
30  
31

### 32 **Expert consultation and consensus survey**

33 We used an abbreviated MORECare Transparent Expert Consultation (TEC) process,  
34 consisting of a modified nominal group technique, to generate recommendations in response  
35 to projected palliative care need. This was followed by a consensus survey to rank and  
36 ascertain consensus on each recommendation for the future delivery of palliative care.<sup>14</sup> A  
37 purposive sample of approximately 50 stakeholders from palliative care, primary care and  
38 social care along with commissioners, service providers, government representatives,  
39 researchers, patient/ carer groups and charities were invited to take part. Potential  
40 participants were identified by co-authors; some were known to the co-authors and had  
41 participated in previous consultations. A half-day consultation took place on 3 September  
42 2019. Projections of future palliative care need, based on the quantitative data analysis, were  
43 presented. Participants were assigned to one of four groups designed to maximise group  
44 heterogeneity in terms of background, role, and experience. Each group discussed the  
45  
46  
47  
48  
49  
50  
51  
52  
53  
54  
55  
56  
57  
58  
59  
60

1  
2  
3 palliative care need projections, critical issues emerging from the data, and then generated  
4 recommendations in response. Individual participants completed a recommendations form in  
5 response to the question “What actions need to be prioritised to meet future palliative care  
6 need by 2040”, and each group identified the group priorities on a white board during the  
7 discussion. Individual and group level priorities were collected. These were subsequently  
8 recorded in Microsoft Excel, synthesized, and used to develop specific statements for the  
9 follow-up consensus survey. One month later, participants received the follow-up survey by  
10 email stating the recommendations generated at the event. Participants were asked to rate the  
11 extent to which they agreed with each recommendation from one to nine (strongly disagree to  
12 strongly agree), using free-text spaces to add comments explaining their judgements. One  
13 completion reminder was sent after two weeks.

14  
15  
16  
17  
18  
19  
20  
21  
22  
23  
24  
25  
26  
27  
28  
29  
30  
31 Survey data was analysed in Excel using descriptive statistics. Informed by guidance on  
32 consensus methods,<sup>15</sup> we categorised each recommendation as follows to ascertain level of  
33 agreement for each statement: scores of 1-3 (recommendation not indicated), 4 – 6  
34 (equivocal) and 7 to 9 (recommendation indicated). We then examined the dispersion of  
35 scores for each statement to determine degree of consensus. Where the interquartile range  
36 fell within each 3-point region outlined we judged there to be ‘*close agreement*’ for the  
37 recommendation; but where ratings fell across each of these regions, we judged that there  
38 was ‘*broad agreement*’.

### 51 **Patient and public involvement (PPI)**

52  
53 A member of the Marie Curie Voices group (patient and carer representative group)  
54 participated in the expert consultation and survey and shared his perspectives on the meaning  
55 of the findings for patient and family care at the expert consultation event. Three PPI  
56  
57  
58  
59  
60

1  
2  
3 representatives from the Marie Curie Voices group commented on the draft manuscript and  
4  
5 survey findings. These comments were used to inform study implications.  
6  
7  
8  
9

### 10 **Reporting guidelines**

11  
12 We used the Strengthening the Reporting of Observational Studies in Epidemiology  
13  
14 guidelines to inform reporting (see online supplementary file 1).  
15  
16  
17  
18

### 19 **Ethical approval**

20  
21 For the trend analysis, we used anonymised, aggregate level data, generated by Public Health  
22  
23 Scotland; consequently, ethical approval was not required. The Usher Research Ethics  
24  
25 Committee at the University of Edinburgh approved the expert consultation and consensus  
26  
27 survey (No: 1938). Written consent was provided by all participants for the consultation and  
28  
29 survey.  
30  
31  
32  
33  
34

## 35 **RESULTS**

### 36 37 38 **Estimated palliative care need in Scotland 2007 to 2017**

39  
40 During this 11 year period, registered deaths in Scotland rose by 3.4% (55,984 to 57,870).<sup>9</sup>  
41  
42 Using various methods to estimate population level palliative care need, we estimated that the  
43  
44 number of people who died with palliative care needs in Scotland in 2017 ranged from  
45  
46 43,403 (Method 1) to 52,148 (Method 3), an increase from 2007 irrespective of method used  
47  
48 (Table 1). See Supplementary file 2 for data by year.  
49  
50  
51  
52  
53

### 54 55 **Projections of population level palliative care need in Scotland from 2018 to 2040**

56  
57 Deaths in Scotland are projected to reach 65,756 by 2040, a 13.6% increase from 2017.<sup>16</sup>  
58  
59 Irrespective of the projection method used, the number of people dying of disease(s)  
60



1  
2  
3 associated with palliative care need is projected to increase. By 2040, we estimate that  
4  
5 between 74% and 95% of those who die might benefit from a palliative care approach (Table  
6  
7  
8 1). See Supplementary file 2 for data by year.  
9  
10  
11  
12  
13  
14  
15  
16  
17  
18  
19  
20  
21  
22  
23  
24  
25  
26  
27  
28  
29  
30  
31  
32  
33  
34  
35  
36  
37  
38  
39  
40  
41  
42  
43  
44  
45  
46  
47  
48  
49  
50  
51  
52  
53  
54  
55  
56  
57  
58  
59  
60

For peer review only

**Table 1: Number and percentage of people who die with palliative care (PC) needs in Scotland based on different estimation and projection methods**

| <b>Projection Method</b> | <b>Description</b>                                                                                                                  | <b>2007</b><br>No. of deaths with PC need (total deaths 55,984) | <b>2007</b><br>% of all deaths with PC need | <b>2017</b><br>No. of deaths with PC need (total deaths 57,870) | <b>2017</b><br>% of all deaths with PC need | <b>2030</b><br>No. of deaths with PC need (projected deaths 60,310) | <b>2030</b><br>% of all deaths with PC need | <b>2040</b><br>No. of projected deaths with PC needs (projected deaths 65,756) | <b>2040</b><br>% of all projected deaths with PC need |
|--------------------------|-------------------------------------------------------------------------------------------------------------------------------------|-----------------------------------------------------------------|---------------------------------------------|-----------------------------------------------------------------|---------------------------------------------|---------------------------------------------------------------------|---------------------------------------------|--------------------------------------------------------------------------------|-------------------------------------------------------|
| <b>1</b>                 | 75% of all deaths                                                                                                                   | 41,988                                                          | 75%                                         | 43,403                                                          | 75%                                         | 45,233                                                              | 75%                                         | 49,317                                                                         | 75%                                                   |
| <b>2A</b>                | ICD-10 codes associated with <b>underlying cause of death only</b> , assuming proportion of palliative care needs remains constant  | 41,310                                                          | 74%                                         | 42,816                                                          | 74%                                         | 44,912                                                              | 74%                                         | 48,869                                                                         | 74%                                                   |
| <b>2B</b>                | ICD-10 codes associated with <b>underlying cause of death only</b> , assuming an annual change based on annual change 2007-17       | 41,310                                                          | 74%                                         | 42,816                                                          | 74%                                         | 45,256                                                              | 75%                                         | 50,084                                                                         | 76%                                                   |
| <b>3</b>                 | ICD codes associated with <b>underlying OR contributory cause of death</b> assuming an annual change based on annual change 2007-17 | 49,476                                                          | 88.0%                                       | 52,148                                                          | 90%                                         | 56,033                                                              | 93%                                         | 62,757                                                                         | 95%                                                   |

### Projections of palliative care need by age group up to 2040

Based on projection method 2B, the number of people who die aged 0 to 74 years with palliative care needs is projected to fall, while those aged 75 and over will increase (Figure 1). The greatest increase will occur for those aged 85 and above. People aged 85 or older will account for just under half (47%) of those dying with palliative care needs by 2040 (23,491 of 50,084 projected deaths associated with palliative care need).

**Insert Figure 1 about here.**

**Figure 1: Projected estimates of the number of people dying in Scotland with palliative care needs by age up to 2040 using method 2B**

*Note: Data for 2007 and 2017 is actual deaths; data for 2030 and 2040 is projected deaths based on method 2B.*

### Projections of underlying cause of death by disease group up to 2040

Based on projection method 2B, deaths with cancer as the main underlying cause of death are projected to rise from 16,203 in 2017 to 19,535 in 2040 (21% increase). Deaths where dementia is the main underlying cause of death are projected to rise from 6,776 in 2017 to 19,284 (185% increase); while deaths from organ failure are projected to continue to fall (from 14,928 in 2017 to 9,957 by 2040) as are deaths from other conditions requiring palliative care (4,909 in 2017 to 1,668 in 2040) (Figure 2).

**Insert Figure 2 about here.**

**Figure 2: Projected underlying cause of death associated with palliative care need by disease group up to 2040 using method 2B**

*Note: Data for 2007 and 2017 is actual deaths; data for 2030 and 2040 is projected deaths based on method 2B.*

## **Proportion of people dying with multimorbidity associated with advanced progressive diseases across different disease groups**

In 2017, overall, 15,725 people died with multimorbidity, i.e. at least two diseases associated with palliative care need from different disease groups (27.2% of all deaths). The number of people projected to die with multimorbidity is projected to increase by 82% to 28,629 by 2040, accounting for 43.5% of all deaths or 45.6% of all palliative care deaths using projection method 3 (Figure 3). The proportion of those who die with multimorbidity is projected to increase by 60% (27.2% to 43.5%). The increases will mainly occur for those in the older age groups (Figure 4). If current trends continue, by 2040, we project that 52% of those aged 85-99 will die from two or more diseases associated with palliative care need from different disease groups.

### **Insert Figure 3 about here**

**Figure 3: Projected number and percentage of people in Scotland dying from multimorbidity associated with palliative care need, 2017 to 2040**

*Note: Data for 2007 and 2017 is actual deaths; data for 2030 and 2040 is projected deaths.*

### **Insert Figure 4 about here.**

**Figure 4: Projected number of people in Scotland dying from multimorbidity associated with palliative care need by age, 2017 to 2040**

*Note: Data for 2007 and 2017 is actual deaths; data for 2030 and 2040 is projected. Given the small number of deaths, the data for the 0-44 age group are too small to be visible.*

## Expert consultation and consensus survey

34 participants participated in the consultation (Supplementary file 1) and 24 completed the follow-up online survey (70.5% response rate). Following de-duplication and synthesis of initial consultation data, 33 potential recommendations relating to nine areas were identified and included in the online survey (Supplementary file 1). Two participants were judged to have misunderstood the survey rating scale as their agreement scores were in the opposite direction of their free-text comments; these were excluded.

There was close or broad agreement that 32 of the 33 proposed recommendations across all nine areas are indicated (Supplementary file 1). Recommendations relating to digital health and person-centred care scored most highly. Agreement scores were highest for: investment in a national digital health platform ( $M = 8.5$ ,  $SD = 0.7$ ); roll-out of shared electronic health and social care records across all settings so they can be accessed by all relevant care professionals as well as the patients themselves ( $M = 8.5$ ,  $SD = 0.9$ ), prioritising the patient or family perspective when providing services to meet their needs ( $M = 8.5$ ,  $SD = 1.0$ ) and encouraging systems promoting person centred as opposed to task oriented care ( $M = 8.3$ ,  $SD = 1.1$ ).

## Discussion

### Principal findings

This study projects an estimate of palliative care need in Scotland, showing that between 14% (method 2) and 20% (method 3 factoring in multimorbidities) more people may need palliative care by 2040 compared to 2017. Cancer and dementia will increase as the main

1  
2  
3 underlying causes of death. For the first time, we project multimorbidity associated with  
4 palliative care needs, operationalised as the proportion of people dying from multiple chronic  
5 progressive diseases across different disease groups. We show that this proportion will rise  
6 by 60%, accounting for nearly half of all palliative care deaths (46%) by 2040. Over half of  
7 those aged between 85 and 89 are projected to die from multimorbidity associated with  
8 palliative care need, indicating increased complexity of needs. Experts recommended  
9 sustained investment in digital systems, such as electronic care co-ordination systems  
10 accessible to patients, carers and professionals, alongside prioritisation of person-centred  
11 approaches.  
12  
13  
14  
15  
16  
17  
18  
19  
20  
21  
22

### 23 24 **Strengths and weaknesses**

25  
26 We used a range of estimation methods accounting for both main underlying and contributory  
27 causes of deaths, which increases the robustness of our findings to inform policy and practice.  
28 The expert consultation and consensus survey ensured implications of the quantitative  
29 findings were grounded in practice. However future consultations should also consider  
30 including representatives from other professional groups including psychology, spiritual care  
31 and other specialities such as neurology and internal medicine.  
32  
33  
34  
35  
36  
37  
38  
39  
40  
41

42 Based on data available at the time of analysis, we applied linear models as we were  
43 primarily interested in projections of what may occur if recent trends continue. Our  
44 projections should not be interpreted as a forecast of what will happen, rather they provide a  
45 starting point for discussions around what may occur under different assumptions, and what  
46 actions might be needed in response. We used a disease count approach to estimate  
47 multimorbidity relevant to population palliative care need as this is straight-forward to  
48 estimate and replicate. Alternative approaches based on multimorbidity indices are  
49 increasingly common,<sup>17</sup> though cannot be used with cause of death data alone. Our definition  
50  
51  
52  
53  
54  
55  
56  
57  
58  
59  
60

1  
2  
3 of multimorbidity was relatively restrictive – decedents were required to have two major  
4 illnesses from different disease groups both of which would individually confer palliative  
5 care need. Our models draw on trends over an 11-year period up to and including 2017 and  
6 project these trends forward. We have drawn on death registry data that relies on accurate  
7 completion of death certificates. We cannot account for changes in how cause of death is  
8 recorded over time, though previous changes have had minor impact on population level  
9 coding.<sup>18</sup> Nor can we account for changes in medical treatments that may change the  
10 distribution of deaths by underlying cause in the future. Significant advances in the treatment  
11 of cancer or dementia might result in lower numbers dying from these diseases than is  
12 currently projected.  
13  
14

15  
16 We also need to be prepared for more sudden increases in mortality as we have seen with  
17 COVID-19. Our estimates make no adjustment for the ongoing COVID-19 pandemic which  
18 has particularly affected people aged 75 or over who accounted for 76% of the 4,649  
19 COVID-related deaths registered in Scotland by 1 November 2020.<sup>19</sup> Excess deaths relating  
20 to, but not directly caused by, COVID-19 have also occurred.<sup>20</sup> The long-term consequences  
21 of the virus are not yet known though recovery for some is often slow and may result in  
22 longer lasting morbidities. This spike in deaths may be followed by changes in age-specific  
23 mortality rates in following months and years. We judge that the impact of this will not  
24 change the main conclusions of this paper, that the need for palliative care will significantly  
25 rise over the next 20 years, with the number of people dying with complex needs increasing  
26 markedly.  
27  
28

### 29 **Findings in relation to existing evidence**

30  
31 Our findings that palliative care need in Scotland is projected to increase by 2040 reflect  
32 findings from other population palliative care projections in England and Wales<sup>3</sup> and  
33  
34  
35  
36  
37  
38  
39  
40  
41  
42  
43  
44  
45  
46  
47  
48  
49  
50  
51  
52  
53  
54  
55  
56  
57  
58  
59  
60

1  
2  
3 Ireland.<sup>4</sup> As in these studies, in Scotland we project that the greatest increase in palliative  
4 care need will be for people aged 85 and above, reflecting an ageing population in each  
5 country. As for England and Wales,<sup>3</sup> deaths where cancer and dementia is the main  
6 underlying cause are projected to increase while the numbers dying from organ failure as the  
7 main underlying cause are projected to fall. Deaths from ‘other diseases’ are projected to  
8 decrease, in part due to reductions in mortality from cerebrovascular diseases and HIV, also  
9 noted in the wider literature.<sup>21 22</sup> In contrast to projections for England and Wales based on  
10 underlying cause of death only<sup>3</sup> we did not find an increase in the proportion of people dying  
11 with palliative care needs over time (methods 2A and 2B). This may be due in part to the  
12 way deaths are recorded. In Scotland, the underlying cause has remained stable while  
13 contributory causes associated with palliative care needs have increased. Further research is  
14 needed to explore these differences.

15  
16  
17 We extended previous work, by modelling future palliative care need using both main  
18 underlying cause of death and contributory causes (method 3). This method results in a  
19 higher estimate of future palliative care need compared with other methods that examine  
20 underlying cause only. Based on method 3, we estimated that in 2017, 90% of all deaths  
21 were associated with palliative care need, and that this is projected to increase to 95% by  
22 2040. These higher estimates are aligned with the maximal estimates reported by Murtagh  
23 colleagues, who also used contributory cause of death to estimate palliative care in England  
24 and Wales for 2006 to 2008.<sup>13</sup> In contrast to more conservative estimates based only on  
25 main underlying cause only, data that also accounts for contributory causes show that the vast  
26 majority of people dying now, and in the future, may benefit from a palliative care approach.



## Implications for clinicians, service managers and policymakers

Multimorbidity is becoming the norm, starting earlier in the life course and rising steeply with age.<sup>7 23</sup> It is widely recognised that health and social care services need to move away from a focus on care of people with single diseases towards systems that meet the needs of people with multiple diseases.<sup>6 24</sup> Palliative care services also need to adapt. The hospice model is still based predominantly on care of people with a primary diagnosis of cancer;<sup>25</sup> specialist services need to evolve to take account of multimorbidity and the associated symptom burden and uncertainty as end of life approaches. Dementia is increasingly common and previous research has shown that mental health comorbidities frequently occur alongside physical comorbidities.<sup>7</sup> The palliative care service needs of patients or family members with dementia or mental health conditions need to be explicitly considered as new services are designed. More people are expected to die in care homes over the next two decades, and care homes may become the most common place of death in England and Wales by 2040.<sup>26 27</sup> Multimorbidity, including dementia, is common amongst residents.<sup>28-30</sup> Models whereby specialist palliative care services support care homes to identify and provide palliative care for residents approaching end of life, alongside the broad expertise from multiple disciplines, need to be commonplace.

Primary care providers need to be trained as 'expert generalists'<sup>24</sup> and need to work more closely with palliative care specialists to enhance communication and coordination across the health and social care system. Electronic care co-ordination systems are vital to support co-ordinated care, enabling the sharing of key clinical information and personal preferences across all care settings and unscheduled care services; sustained investment in these systems is a priority.<sup>31 32</sup> As identified previously,<sup>33-35</sup> there is a need for palliative care education and training for non-specialist health and social care workers in all settings. Training and education in the challenges of caring for people dying with multimorbidity is required. This

1  
2  
3 might usefully involve exposure to primary care, geriatrics, mental health and dementia  
4  
5 care.<sup>36</sup> As found previously,<sup>27</sup> greater investment in increasing and retaining the community  
6  
7 health and social care workforce to meet the projected increases in palliative care need is  
8  
9 recommended.  
10  
11

### 12 13 **Unanswered questions and future research** 14 15

16 Research on dying from multiple chronic diseases requiring palliative care input is needed –  
17  
18 which combinations of diseases are most prevalent, and how well served are those who die  
19  
20 from multimorbidity compared to those with a single or dominant illness. Research focusing  
21  
22 on the co-existence of mental health disorders with physical disorders at the end of life was  
23  
24 not addressed here but needs to be prioritised in the future. We also need to better understand  
25  
26 how well equipped health and social care professionals are to care for people with  
27  
28 multimorbidity at the end of life; what types of care models are needed; what education,  
29  
30 training and support is required, and for whom. Since the COVID-19 pandemic, research is  
31  
32 required to examine the extent to which COVID-19 has influenced mortality trends and  
33  
34 future projections of palliative care need across the UK.  
35  
36  
37  
38  
39  
40  
41  
42  
43  
44  
45  
46  
47  
48  
49  
50  
51  
52  
53  
54  
55  
56  
57  
58  
59  
60

## Conclusion

By 2040, irrespective of the estimation method used, we project that many more people in Scotland will die with palliative care needs, particularly in the oldest age groups; and care complexity will increase. Current models of palliative care must adapt to meet increased need amongst those aged 85 and over, most dying from multiple diseases, often including dementia. There is a need for sustained investment in a national digital health and social care system, that remains person centred, to improve care co-ordination and optimise palliative care for people wherever they reside.

1  
2  
3 **Author contributions:** AMF, RM, AEB and SE conceived the study. AMF obtained the  
4 funding. AMF, AEB, SE, DC, RM, RMA, AI, SM, CE, IJH and SAM were involved in  
5 study design. DC, RMA and AMF sourced the data. DC undertook the data analysis under  
6 the supervision of AMF, AEB, SE and RMA. AMF analysed data from the expert  
7 consultation with guidance from AEB and CE. AMF wrote the first draft of the manuscript,  
8 with all authors contributing to the subsequent and final drafts.  
9  
10  
11  
12  
13  
14  
15  
16  
17

18 **Funding statement:** This work was supported by a small grant from Marie Curie awarded on  
19 28/2/2019 (£14,277). The grant covered funding allocated to DC at Public Health Scotland  
20 for consultation services, and to AEB and SE at Kings College London. The permanent posts  
21 of AMF and RM are funded by Marie Curie. AEB is supported by Cicely Saunders  
22 International and the Dunhill Medical Trust. CJE is funded by HEE/NIHR Senior Clinical  
23 Lectureship (ICA-SCL-2015-01-001). The views expressed are those of the author(s) and not  
24 necessarily those of the NIHR, the Department of Health and Social Care, Cicely Saunders  
25 International, Dunhill Medical Trust or Marie Curie.  
26  
27  
28  
29  
30  
31  
32  
33  
34  
35  
36  
37

### 38 **Competing Interests:**

39  
40 The authors declare: financial support to DC, AEB and SE as above; and no financial relationships  
41 with any organisations that might have an interest in the submitted work in the previous three years.  
42  
43 AMF and RM are employed by Marie Curie, a charity that provides palliative and end of life care to  
44 people with a terminal illness across the UK.  
45  
46  
47  
48  
49

50 **Patient consent:** Not required  
51  
52

53 **Data sharing statement:** Any queries about Public Health Scotland data sources should be  
54 directed to Rosalia Munoz-Arroyo at [rosalia.munoz-arroyo@phs.scot](mailto:rosalia.munoz-arroyo@phs.scot) .  
55  
56  
57  
58  
59  
60

1  
2  
3 **Acknowledgements:** We are particularly grateful to Dr Kirsty Boyd for assistance with the  
4 expert consultation, and for commenting on a draft of this manuscript. We are very grateful  
5 to Harry Bunch (HB), Diana Robinson (DR) and Peter Buckle (PB), members of the Marie  
6 Curie Voices group, for PPI input. We thank the participants in our expert consultation for  
7 contributions at the expert consultation and for completing the follow-up survey. Special  
8 thanks to Dr Peter May at Trinity College Dublin for assisting at our consultation.  
9  
10  
11  
12  
13  
14  
15  
16  
17  
18  
19  
20  
21  
22  
23  
24  
25  
26  
27  
28  
29  
30  
31  
32  
33  
34  
35  
36  
37  
38  
39  
40  
41  
42  
43  
44  
45  
46  
47  
48  
49  
50  
51  
52  
53  
54  
55  
56  
57  
58  
59  
60

For peer review only

## References

1. Foreman KJ, Marquez N, Dolgert A, et al. Forecasting life expectancy, years of life lost, and all-cause and cause-specific mortality for 250 causes of death: reference and alternative scenarios for 2016–40 for 195 countries and territories. *The Lancet* 2018 doi: [https://doi.org/10.1016/S0140-6736\(18\)31694-5](https://doi.org/10.1016/S0140-6736(18)31694-5)
2. World Population Ageing: United Nations, Department of Economic and Social Affairs, Population Division, 2015.
3. Etkind SN, Bone AE, Gomes B, et al. How many people will need palliative care in 2040? Past trends, future projections and implications for services. *BMC Medicine* 2017;15(1):1-10. doi: 10.1186/s12916-017-0860-2
4. May P, Johnston B, Normand C, et al. Population-based palliative care planning in Ireland: how many people will live and die with serious illness to 2046? [version 2; peer review: 2 approved]. *HRB Open Research* 2020;2(35) doi: 10.12688/hrbopenres.12975.2
5. Academy of Medical Sciences. Multimorbidity: a priority for global health research, 2018.
6. Banerjee S. Multimorbidity—older adults need health care that can count past one. *The Lancet* 2015;385(9968):587-89. doi: 10.1016/S0140-6736(14)61596-8
7. Barnett K, Mercer SW, Norbury M, et al. Epidemiology of multimorbidity and implications for health care, research, and medical education: a cross-sectional study. *The Lancet* 2012;380(9836):37-43. doi: 10.1016/S0140-6736(12)60240-2
8. Guthrie B, Payne K, Alderson P, et al. Adapting clinical guidelines to take account of multimorbidity. *BMJ* 2012;345(7878):22-24.
9. National Records of Scotland. Vital Events Reference Tables 2017. Available from <https://www.nrscotland.gov.uk/statistics-and-data/statistics/statistics-by-theme/vital-events/deaths>. Accessed on 15/8/2018, 2018.
10. National Records of Scotland. Projected Population of Scotland (2016-based) 2016 [Available from: <https://www.nrscotland.gov.uk/statistics-and-data/statistics/statistics-by-theme/population/population-projections/population-projections-scotland/2016-based/list-of-tables>].
11. Gómez-Batiste CX, Martínez-Muñoz CM, Blay CC, et al. Identifying needs and improving palliative care of chronically ill patients: a community-oriented, population-based, public-health approach. *Current Opinion in Supportive and Palliative Care* 2012;6(3):371-78. doi: 10.1097/SPC.0b013e328356aaed
12. Rosenwax L, McNamara B, Blackmore A, et al. Estimating the size of a potential palliative care population. *Palliative Medicine* 2005;19(7):556-62. doi: 10.1191/0269216305pm1067oa
13. Murtagh FEM, Verne J, Bausewein C, et al. How many people need palliative care? A study developing and comparing methods for population-based estimates. 2014 doi: <https://doi.org/10.1177/0269216313489367>
14. Higginson IJ, Evans CJ, Grande G, et al. Evaluating complex interventions in End of Life Care: the MORECare Statement on good practice generated by a synthesis of transparent expert consultations and systematic reviews. *BMC Medicine* 2013;11(1):111. doi: 10.1186/1741-7015-11-111
15. Jones J, Hunter DL. Consensus methods for medical and health services research. (Qualitative Research, part 6). *British Medical Journal* 1995;311(7001):376. doi: 10.1136/bmj.311.7001.376
16. Central Statistics Office (Ireland). Current Population and Labour Force Projections (2016 Based) 2018 [Available from: [https://statbank.cso.ie/px/pxeirestat/Database/eirestat/Current%20Population%20and%20Labour%20Force%20Projections%20\(2016%20Based\)/Current%20Population%20and%20Labour%20Force%20Projections%20\(2016%20Based\)\\_statbank.asp?SP=Current%20Population%20and%20Labour%20Force%20Projections%20\(2016%20Based\)&Planguage=0](https://statbank.cso.ie/px/pxeirestat/Database/eirestat/Current%20Population%20and%20Labour%20Force%20Projections%20(2016%20Based)/Current%20Population%20and%20Labour%20Force%20Projections%20(2016%20Based)_statbank.asp?SP=Current%20Population%20and%20Labour%20Force%20Projections%20(2016%20Based)&Planguage=0)]

17. Stirland LE, González-Saavedra L, Mullin DS, et al. Measuring multimorbidity beyond counting diseases: systematic review of community and population studies and guide to index choice. *BMJ* 2020;368:m160. doi: 10.1136/bmj.m160
18. National Records of Scotland. The Impact of the implementation of IRIS software for ICD-10 cause of death coding on mortality statistics in Scotland 2020 [Available from: <https://www.nrscotland.gov.uk/files//statistics/vital-events/impact-of-implementation-iris-for-icd.pdf> accessed 26th May 2020.
19. National Records of Scotland. Deaths involving coronavirus (COVID-19) in Scotland: Week 44 (26 October to 1 November) 2020 [Available from: <https://www.nrscotland.gov.uk/covid19stats>.
20. Bone AE, Finucane AM, Leniz J, et al. Changing patterns of mortality during the COVID-19 pandemic: Population-based modelling to understand palliative care implications. *Palliative Medicine* 2020;34(9):1193-201. doi: 10.1177/0269216320944810
21. Wafa HA, Wolfe CDA, Emmett E, et al. Burden of Stroke in Europe. *Stroke* 2020;51(8):2418-27. doi: 10.1161/STROKEAHA.120.029606
22. Public Health Scotland. HIV in Scotland: update to 31 December 2019. Publication date: 23 June 2020. Accessible from: <https://www.hps.scot.nhs.uk/web-resources-container/hiv-in-scotland-update-to-31-december-2019/>, 2020.
23. Canizares M, Hogg-Johnson S, Gignac MAM, et al. Increasing Trajectories of Multimorbidity Over Time: Birth Cohort Differences and the Role of Changes in Obesity and Income. *The Journals of Gerontology: Series B* 2017;73(7):1303-14. doi: 10.1093/geronb/gbx004
24. WHO. Multimorbidity: Technical Series on Safer Primary Care. Geneva: World Health Organisation 2016. Licence: CC BY-NC-SA 3.0 IGO, 2016.
25. Allsop MJ, Ziegler LE, Mulvey MR, et al. Duration and determinants of hospice-based specialist palliative care: A national retrospective cohort study. *Palliative Medicine* 2018;32(8):1322-33. doi: 10.1177/0269216318781417
26. Bone AE, Gomes B, Etkind SN, et al. What is the impact of population ageing on the future provision of end-of-life care? Population-based projections of place of death. *Palliative Medicine* 2018;32(2):329-36. doi: 10.1177/0269216317734435
27. Finucane AM, Bone A, Evans CJ, et al. The impact of population ageing on end-of-life care in Scotland: Population-based projections of place of death and recommendations for future service provision. *BMC Palliative Care* 2019 doi: <https://doi.org/10.1186/s12904-019-0490-x>
28. Finucane AM, Stevenson B, Murray SA. Gradual physical decline characterises the illness trajectories of care home residents. *International Journal of Palliative Nursing* 2017;23(9):457-61. doi: 10.12968/ijpn.2017.23.9.457
29. Gordon AL, Franklin M, Bradshaw L, et al. Health status of UK care home residents: a cohort study. *Age and Ageing* 2014;43(1):97-103. doi: 10.1093/ageing/aft077
30. Information Services Division Scotland. Care Home Census for Adults in Scotland: Figures for 2007-2017, 2018.
31. Finucane AM, Davydaitis D, Horseman Z, et al. Electronic care coordination systems for people with advanced progressive illness: a mixed-methods evaluation in Scottish primary care. *The British journal of general practice : the journal of the Royal College of General Practitioners* 2019;70(690) doi: 10.3399/bjgp19X707117
32. Coordinate My Care 2020 [Available from: <https://www.coordinatemycare.co.uk/>.
33. Scottish Care. Trees that bend in the wind: Exploring the Experiences of Front Line Support Workers Delivering Palliative and End of Life Care 2017 [Available from: <http://www.scottishcare.org/wp-content/uploads/2017/02/PEOLC-Report-final-.pdf>.
34. Magee C, Koffman J. Out-of-hours palliative care: what are the educational needs and preferences of general practitioners? *BMJ Supportive & Palliative Care* 2016;6(3):362-68. doi: 10.1136/bmjspcare-2014-000764

- 1
- 2
- 3 35. Anstey S, Powell T, Coles B, et al. Education and training to enhance end-of-life care for nursing
- 4 home staff: a systematic literature review. *BMJ Supportive & Palliative Care* 2016;6(3):353-
- 5 61. doi: 10.1136/bmjspcare-2015-000956
- 6
- 7 36. Oliver D. Manifesto for multimorbidity. *BMJ* 2018;360 (K1044)
- 8
- 9
- 10
- 11
- 12
- 13
- 14
- 15
- 16
- 17
- 18
- 19
- 20
- 21
- 22
- 23
- 24
- 25
- 26
- 27
- 28
- 29
- 30
- 31
- 32
- 33
- 34
- 35
- 36
- 37
- 38
- 39
- 40
- 41
- 42
- 43
- 44
- 45
- 46
- 47
- 48
- 49
- 50
- 51
- 52
- 53
- 54
- 55
- 56
- 57
- 58
- 59
- 60

For peer review only



## Figures

Figure 1: Projected estimates of the number of people dying in Scotland with palliative care needs by age up to 2040 using method 2B

Figure 2: Projected underlying cause of death associated with palliative care need by disease group up to 2040 using method 2B

Figure 3: Projected number and percentage of people in Scotland dying from multimorbidity associated with palliative care need, 2017 to 2040

Figure 4: Projected number of people in Scotland dying from multimorbidity associated with palliative care need by age, 2017 to 2040

1  
2  
3  
4  
5  
6  
7  
8  
9  
10  
11  
12  
13  
14  
15  
16  
17  
18  
19  
20  
21  
22  
23  
24  
25  
26  
27  
28  
29  
30  
31  
32  
33  
34  
35  
36  
37  
38  
39  
40  
41  
42  
43  
44  
45  
46  
47  
48  
49  
50  
51  
52  
53  
54  
55  
56  
57  
58  
59  
60

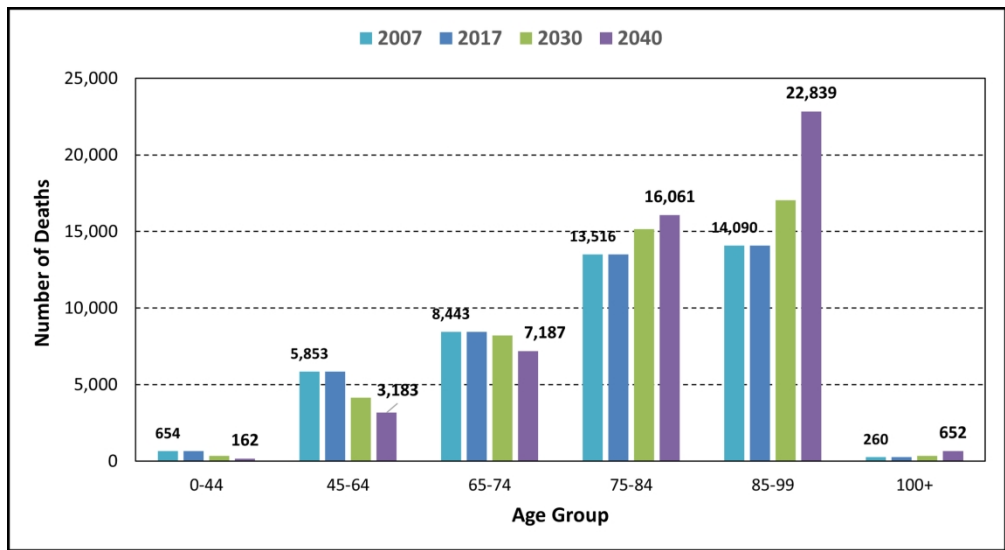

Figure 1: Projected estimates of the number of people dying in Scotland with palliative care needs by age up to 2040 using method 2B

191x104mm (300 x 300 DPI)

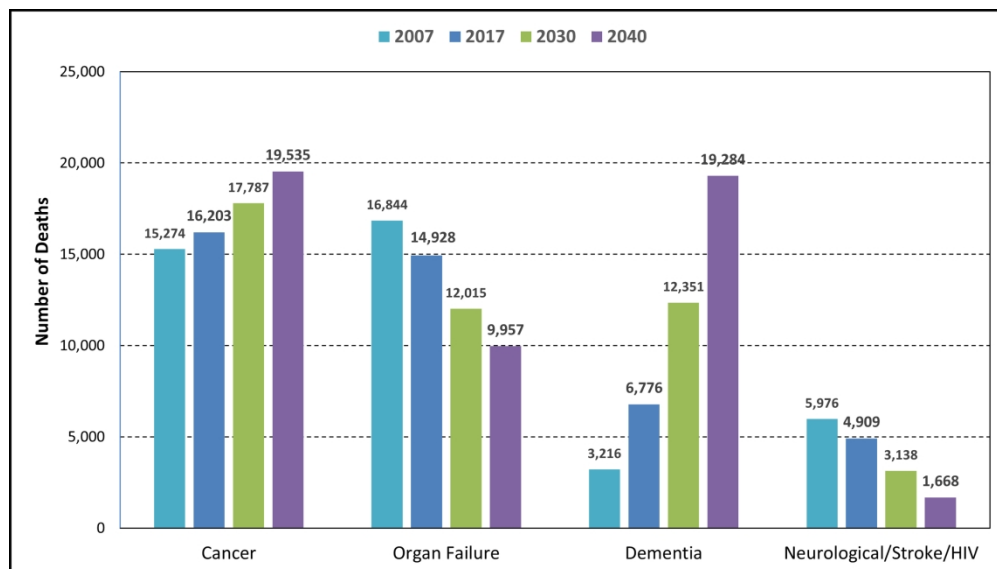

Figure 2: Projected underlying cause of death associated with palliative care need by disease group up to 2040 using method 2B

216x122mm (300 x 300 DPI)

1  
2  
3  
4  
5  
6  
7  
8  
9  
10  
11  
12  
13  
14  
15  
16  
17  
18  
19  
20  
21  
22  
23  
24  
25  
26  
27  
28  
29  
30  
31  
32  
33  
34  
35  
36  
37  
38  
39  
40  
41  
42  
43  
44  
45  
46  
47  
48  
49  
50  
51  
52  
53  
54  
55  
56  
57  
58  
59  
60

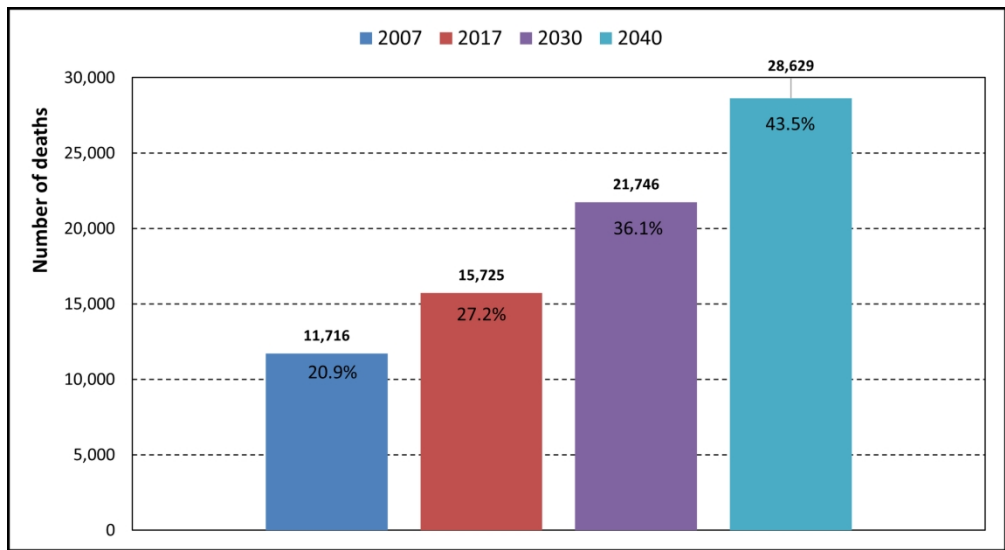

Figure 3: Projected number and percentage of people in Scotland dying from multimorbidity associated with palliative care need, 2017 to 2040

191x104mm (300 x 300 DPI)

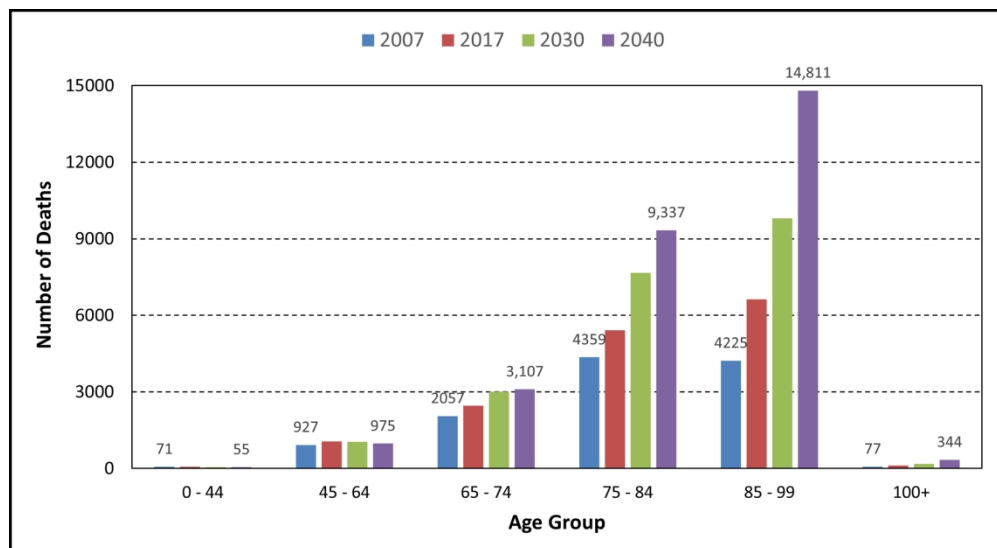

Figure 4: Projected number of people in Scotland dying from multimorbidity associated with palliative care need by age, 2017 to 2040

191x104mm (300 x 300 DPI)

1  
2  
3  
4  
5  
6  
7  
8  
9  
10  
11  
12  
13  
14  
15  
16  
17  
18  
19  
20  
21  
22  
23  
24  
25  
26  
27  
28  
29  
30  
31  
32  
33  
34  
35  
36  
37  
38  
39  
40  
41  
42  
43  
44  
45  
46  
47  
48  
49  
50  
51  
52  
53  
54  
55  
56  
57  
58  
59  
60

## Supplementary File 1

**Page 2:**

International Classification of Disease-10 codes used to estimate palliative care need

**Page 3:**

Role of participants in the expert consultation

**Page 4 - 8:**

Strength of agreement with survey items

For peer review only

### International Classification of Disease-10 codes used to estimate palliative care need

| Disease Group | ICD10 Code                                                                        | Conditions included                                                                                                                                                                             |
|---------------|-----------------------------------------------------------------------------------|-------------------------------------------------------------------------------------------------------------------------------------------------------------------------------------------------|
| Cancer        | C00 – C97                                                                         | All deaths from malignant neoplasms.                                                                                                                                                            |
| Organ Failure | I00 – I52 (excl. I12 & I13)<br>J40-47, J96<br>I12, I13, N17, N18, N28<br>K70 - 77 | Heart disease and heart failure.<br>Chronic lower respiratory disease, respiratory failure.<br>Reno-vascular disease, renal failure.<br>Liver disease.                                          |
| Dementia      | F01, F03, G30, R54                                                                | Dementia, vascular dementia, Alzheimer's disease, senility.                                                                                                                                     |
| Other         | G10, G12.2, G20, G23.1, G35, G90.3<br>I60 – I69<br>B20-24                         | Huntington's disease, motor neurone disease, Parkinson's disease, progressive supranuclear palsy, multiple sclerosis, multi-system atrophy. Haemorrhagic, ischaemic and unspecified stroke. HIV |

**Source:** Murtagh FEM, Verne J, Bausewein C, et al. How many people need palliative care? 2014. DOI: <https://doi.org/10.1177/0269216313489367>.

### Role of participants in the expert consultation

| Area/role                                                                                                 | Number of participants |
|-----------------------------------------------------------------------------------------------------------|------------------------|
| Service manager (3 x NHS; 2 x Hospices)                                                                   | 5                      |
| Policy (Government x 1, Specialist palliative care x 2; palliative care x 1; independent care sector x 1) | 4                      |
| Data analyst (Government)                                                                                 | 4                      |
| GP                                                                                                        | 4                      |
| Researcher (University x 2; charity x 2)                                                                  | 4                      |
| Palliative care specialist (doctor x 2; nurse x 2)                                                        | 4                      |
| Quality Improvement Facilitator (NHS)                                                                     | 2                      |
| Hospice manager                                                                                           | 2                      |
| PPI                                                                                                       | 1                      |
| Project manager (Advocacy organisation)                                                                   | 1                      |
| Volunteer (Hospice)                                                                                       | 1                      |
| Administrator                                                                                             | 1                      |
| Chief Executive (advocacy organisation)                                                                   | 1                      |
| <b>Grand Total</b>                                                                                        | <b>34</b>              |



## Strength of agreement with survey items

| Area                    | Recommended actions                                                                                                                                                     | Agreement rating 1 (strongly disagree) to 9 (strongly agree) |     |        |     |     |     | Action indicated, equivocal or not indicated | Consensus / Strength of agreement |
|-------------------------|-------------------------------------------------------------------------------------------------------------------------------------------------------------------------|--------------------------------------------------------------|-----|--------|-----|-----|-----|----------------------------------------------|-----------------------------------|
|                         |                                                                                                                                                                         | Mean                                                         | SD  | Median | IQR | Min | Max |                                              |                                   |
| Digital technology      | Invest in the national digital platform so it is fully resourced and can be used by all                                                                                 | 8.5                                                          | 0.7 | 9      | 1   | 7   | 9   | Indicated                                    | Close agreement                   |
|                         | Ensure that integrated electronic care records are accessible to all health and social care professionals involved in the care of the person, and the person themselves | 8.5                                                          | 0.9 | 9      | 1   | 6   | 9   | Indicated                                    | Close agreement                   |
|                         | Adopt digital technology such as videoconferencing and telemedicine to facilitate access to support for people with palliative care needs and their carers at home      | 7.6                                                          | 1.5 | 8      | 3   | 4   | 9   | Indicated                                    | Broad agreement                   |
| Person centred approach | Prioritise the patient/carer perspective, value the views of the person receiving care and use this information to provide services tailored to their needs.            | 8.5                                                          | 1.0 | 9      | 1   | 5   | 9   | Indicated                                    | Close agreement                   |
|                         | Encourage systems that promote person centred rather than task-oriented care                                                                                            | 8.3                                                          | 1.1 | 9      | 1   | 5   | 9   | Indicated                                    | Close agreement                   |
|                         | Personalise settings that aren't home (hospices, care home, hospital)                                                                                                   | 7.8                                                          | 1.3 | 8      | 2   | 5   | 9   | Indicated                                    | Close agreement                   |

|                                               |                                                                                                                                                                                                                |     |     |     |   |   |   |           |                 |
|-----------------------------------------------|----------------------------------------------------------------------------------------------------------------------------------------------------------------------------------------------------------------|-----|-----|-----|---|---|---|-----------|-----------------|
| <b>Specialist/generalist palliative care</b>  | Increase capacity and enhance community specialist palliative care services to support primary care                                                                                                            | 7.8 | 1.1 | 8   | 2 | 6 | 9 | Indicated | Close agreement |
|                                               | Prioritise models that improve communication between specialist and non-specialist services to improve the patient journey                                                                                     | 7.7 | 1.4 | 8   | 2 | 5 | 9 | Indicated | Close agreement |
|                                               | Build specialist palliative care capacity to provide education and support to generalists.                                                                                                                     | 7.3 | 1.2 | 7.5 | 2 | 5 | 9 | Indicated | Close agreement |
| <b>Informal carer &amp; community support</b> | Create opportunities to facilitate and improve conversations around death and dying both in clinical practice and in society in general.                                                                       | 8.0 | 1.2 | 8.5 | 2 | 5 | 9 | Indicated | Close agreement |
|                                               | Support communities to start compassionate community initiatives with a focus on improving people's experiences of deteriorating health, death, dying and bereavement, by providing advice on ways to do this. | 7.9 | 1.2 | 8   | 2 | 5 | 9 | Indicated | Close agreement |
|                                               | Build community capacity for informal care; not just formal volunteers, but also "active, engaged citizens"                                                                                                    | 7.9 | 1.2 | 8   | 2 | 5 | 9 | Indicated | Close agreement |
| <b>Research, data &amp; evidence</b>          | Collect and collate care data to increase understanding of unmet needs in order to inform service design and workforce planning                                                                                | 7.9 | 1.0 | 8   | 2 | 5 | 9 | Indicated | Close agreement |
|                                               | Access and use evidence to improve our understanding of people's needs                                                                                                                                         | 7.8 | 1.1 | 8   | 2 | 5 | 9 | Indicated | Close agreement |

|                                     |                                                                                                                                                 |     |     |     |   |   |   |           |                 |
|-------------------------------------|-------------------------------------------------------------------------------------------------------------------------------------------------|-----|-----|-----|---|---|---|-----------|-----------------|
|                                     | and outcomes in palliative care and inform service planning.                                                                                    |     |     |     |   |   |   |           |                 |
| <b>Workforce</b>                    | Better integrate workforce planning and investment to meet projected increases in future palliative care need                                   | 8.0 | 1.4 | 8.5 | 2 | 4 | 9 | Indicated | Close agreement |
|                                     | Increase investment in the community-based workforce including GPs, community nurses, social care staff and nurse specialists                   | 7.9 | 1.5 | 8.5 | 2 | 4 | 9 | Indicated | Close agreement |
|                                     | Prioritise investment in recruitment, retention, education and training for social care staff                                                   | 7.7 | 1.5 | 8   | 2 | 4 | 9 | Indicated | Close agreement |
|                                     | Promote approaches that make both health and social care professionals feel part of the same team.                                              | 7.5 | 1.5 | 8   | 3 | 4 | 9 | Indicated | Broad agreement |
| <b>Governance and commissioning</b> | Encourage Scottish Government to invest in palliative care and to re-establish palliative care policy framework and recommendations             | 8.1 | 1.4 | 9   | 1 | 5 | 9 | Indicated | Close agreement |
|                                     | Conduct evidence based strategic planning to facilitate decision-making regarding models of care and resource use                               | 7.5 | 1.4 | 8   | 3 | 4 | 9 | Indicated | Broad agreement |
|                                     | Increase accountability for embedding existing evidence based good practice                                                                     | 6.9 | 1.5 | 7   | 2 | 4 | 9 | Indicated | Broad agreement |
| <b>Models or approaches to care</b> | Realign palliative care in the health service system. Move away from focus on disease specific and episodic care to management of complex needs | 7.5 | 1.3 | 8   | 2 | 5 | 9 | Indicated | Close agreement |

|                                     |                                                                                                                                                                 |     |     |     |   |   |   |           |                 |
|-------------------------------------|-----------------------------------------------------------------------------------------------------------------------------------------------------------------|-----|-----|-----|---|---|---|-----------|-----------------|
|                                     | Improve efficiency and flexibility of bed use in community settings (e.g. respite admissions to NHS complex care units or care homes) to benefit more people    | 7.5 | 1.4 | 8   | 2 | 4 | 9 | Indicated | Close agreement |
|                                     | Improve coordination and greater use of multi-disciplinary teams for people with dementia                                                                       | 7.4 | 1.5 | 7.5 | 2 | 4 | 9 | Indicated | Close agreement |
|                                     | Reform commissioning processes in social care to enable compassion-led, relationship-centred, time flexible care.                                               | 7.4 | 1.4 | 7   | 3 | 5 | 9 | Indicated | Broad agreement |
|                                     | Promote use of formal tools and approaches to improve early identification for a palliative care approach                                                       | 7.3 | 1.4 | 7   | 3 | 5 | 9 | Indicated | Broad agreement |
| <b>Staff training and wellbeing</b> | Train care home and social care staff in the principles of palliative care to increase their confidence in identifying and caring for people at the end of life | 8.1 | 0.9 | 8   | 2 | 6 | 9 | Indicated | Close agreement |
|                                     | Promote and encourage self-compassion, self-reliance and empathy amongst staff                                                                                  | 7.3 | 1.8 | 8   | 3 | 4 | 9 | Indicated | Broad agreement |
|                                     | Invest in palliative care training for generalists in all settings                                                                                              | 7.6 | 1.5 | 8   | 3 | 5 | 9 | Indicated | Broad agreement |
|                                     | Increase social care staff training to recognise and respond to clients' psychological needs                                                                    | 7.2 | 1.5 | 7   | 3 | 5 | 9 | Indicated | Broad agreement |
|                                     | Prioritise education and training in communication and listening skills                                                                                         | 7.2 | 1.7 | 7   | 3 | 3 | 9 | Indicated | Broad agreement |

|  |                                                                                                    |     |     |     |   |   |   |           |                 |
|--|----------------------------------------------------------------------------------------------------|-----|-----|-----|---|---|---|-----------|-----------------|
|  | Organisations providing care should invest in compassionate and supportive systems for their staff | 7.3 | 1.4 | 7   | 3 | 5 | 9 | Indicated | Broad agreement |
|  | Provide education and training for leaders including compassionate care.                           | 6.5 | 1.6 | 6.5 | 2 | 3 | 9 | Equivocal | Broad agreement |

For peer review only

1  
2  
3  
4  
5  
6  
7  
8  
9  
10  
11  
12  
13  
14  
15  
16  
17  
18  
19  
20  
21  
22  
23  
24  
25  
26  
27  
28  
29  
30  
31  
32  
33  
34  
35  
36  
37  
38  
39  
40  
41  
42  
43  
44  
45  
46  
47  
48  
49  
50  
51  
52  
53  
54  
55  
56  
57  
58  
59  
60

For peer review only

**Data Sources (blue tabs)**

[All Deaths - extracted from the NRS deaths database held by PHS](#)

[PC Deaths \(Underlying Cause\) - extracted from the NRS deaths database held by PHS, based on 'underly](#)

[PC Deaths \(All Causes\) - extracted from the NRS deaths database held by PHS, based on both 'underlyin](#)

[ONS Mortality Projections - published by the ONS](#)

**Projection Methods (orange tabs)**

[Method 1](#)

[Method 2A](#)

[Method 2B](#)

[Method 3](#)

**Projections by Condition Using Method 2B (green tabs)**

[Cancer](#)

[Organ Failure](#)

[Dementia](#)

[Other PC Deaths](#)

**Projection of Multimorbidity Using Method 3 (red tab)**

[Multimorbidity](#)

**Acronyms**

NRS National Records of Scotland

ONS Office for National Statistics

PC Palliative care

PHS Public Health Scotland

1  
2  
3  
4  
5  
6  
7  
8  
9  
10  
11  
12  
13  
14  
15  
16  
17  
18  
19  
20  
21  
22  
23  
24  
25  
26  
27  
28  
29  
30  
31  
32  
33  
34  
35  
36  
37  
38  
39  
40  
41  
42  
43  
44  
45  
46  
47  
48  
49  
50  
51  
52  
53  
54  
55  
56  
57  
58  
59  
60

ring cause of death' only  
g cause of death' and 'contributory causes of death'

For peer review only



|    | <b>Gender</b> | <b>Age Group</b> | <b>2007</b> | <b>2008</b> | <b>2009</b> | <b>2010</b> | <b>2011</b> | <b>2012</b> | <b>2013</b> |
|----|---------------|------------------|-------------|-------------|-------------|-------------|-------------|-------------|-------------|
| 1  |               |                  |             |             |             |             |             |             |             |
| 2  |               |                  |             |             |             |             |             |             |             |
| 3  | Female        | 0 - 4            | 144         | 130         | 113         | 118         | 117         | 101         | 107         |
| 4  | Female        | 5 - 9            | 11          | 11          | 11          | 6           | 10          | 13          | 5           |
| 5  | Female        | 10 - 14          | 14          | 18          | 19          | 13          | 12          | 7           | 11          |
| 6  | Female        | 15 - 19          | 50          | 55          | 47          | 52          | 43          | 30          | 44          |
| 7  | Female        | 20 - 24          | 52          | 68          | 64          | 59          | 52          | 55          | 38          |
| 8  | Female        | 25 - 29          | 62          | 70          | 75          | 70          | 89          | 87          | 60          |
| 9  | Female        | 30 - 34          | 104         | 102         | 109         | 121         | 104         | 99          | 113         |
| 10 | Female        | 35 - 39          | 197         | 194         | 181         | 165         | 188         | 141         | 152         |
| 11 | Female        | 40 - 44          | 293         | 303         | 327         | 287         | 269         | 292         | 246         |
| 12 | Female        | 45 - 49          | 483         | 449         | 448         | 427         | 470         | 419         | 422         |
| 13 | Female        | 50 - 54          | 641         | 634         | 663         | 640         | 691         | 660         | 658         |
| 14 | Female        | 55 - 59          | 918         | 930         | 863         | 846         | 860         | 851         | 884         |
| 15 | Female        | 60 - 64          | 1393        | 1385        | 1388        | 1426        | 1359        | 1298        | 1242        |
| 16 | Female        | 65 - 69          | 1980        | 1851        | 1785        | 1824        | 1767        | 1836        | 1871        |
| 17 | Female        | 70 - 74          | 2752        | 2709        | 2610        | 2621        | 2501        | 2619        | 2585        |
| 18 | Female        | 75 - 79          | 3877        | 4111        | 3766        | 3684        | 3623        | 3753        | 3671        |
| 19 | Female        | 80 - 84          | 5206        | 5188        | 4859        | 4923        | 4735        | 5081        | 4844        |
| 20 | Female        | 85 - 89          | 5347        | 5557        | 5506        | 5220        | 5248        | 5422        | 5341        |
| 21 | Female        | 90 - 94          | 3714        | 3584        | 3385        | 3591        | 3730        | 4177        | 4203        |
| 22 | Female        | 95 - 99          | 1552        | 1579        | 1498        | 1600        | 1569        | 1649        | 1531        |
| 23 | Female        | 100+             | 301         | 268         | 311         | 311         | 311         | 332         | 347         |
| 24 |               |                  |             |             |             |             |             |             |             |
| 25 |               |                  |             |             |             |             |             |             |             |
| 26 | Male          | 0 - 4            | 177         | 162         | 161         | 142         | 158         | 153         | 119         |
| 27 | Male          | 5 - 9            | 13          | 19          | 14          | 18          | 17          | 19          | 9           |
| 28 | Male          | 10 - 14          | 31          | 16          | 13          | 11          | 14          | 17          | 18          |
| 29 | Male          | 15 - 19          | 127         | 106         | 105         | 95          | 78          | 61          | 71          |
| 30 | Male          | 20 - 24          | 207         | 174         | 149         | 151         | 153         | 107         | 112         |
| 31 | Male          | 25 - 29          | 188         | 224         | 221         | 196         | 188         | 194         | 155         |
| 32 | Male          | 30 - 34          | 273         | 279         | 227         | 234         | 251         | 257         | 227         |
| 33 | Male          | 35 - 39          | 371         | 376         | 336         | 318         | 334         | 312         | 280         |
| 34 | Male          | 40 - 44          | 537         | 492         | 548         | 481         | 513         | 436         | 492         |
| 35 | Male          | 45 - 49          | 674         | 746         | 665         | 669         | 635         | 655         | 666         |
| 36 | Male          | 50 - 54          | 1011        | 969         | 963         | 972         | 850         | 896         | 924         |
| 37 | Male          | 55 - 59          | 1471        | 1418        | 1282        | 1343        | 1256        | 1267        | 1303        |
| 38 | Male          | 60 - 64          | 2101        | 2063        | 2030        | 2045        | 1955        | 1884        | 1764        |
| 39 | Male          | 65 - 69          | 2540        | 2649        | 2538        | 2423        | 2460        | 2508        | 2609        |
| 40 | Male          | 70 - 74          | 3542        | 3403        | 3272        | 3224        | 3291        | 3172        | 3157        |
| 41 | Male          | 75 - 79          | 4238        | 4063        | 3908        | 4012        | 3817        | 3949        | 3940        |
| 42 | Male          | 80 - 84          | 4309        | 4227        | 4153        | 4258        | 4300        | 4168        | 4375        |
| 43 | Male          | 85 - 89          | 3152        | 3230        | 3444        | 3271        | 3513        | 3612        | 3588        |
| 44 | Male          | 90 - 94          | 1505        | 1421        | 1305        | 1579        | 1630        | 1832        | 2025        |
| 45 | Male          | 95 - 99          | 393         | 407         | 441         | 452         | 448         | 459         | 438         |
| 46 | Male          | 100+             | 33          | 60          | 51          | 69          | 52          | 57          | 53          |
| 47 |               |                  |             |             |             |             |             |             |             |
| 48 |               |                  |             |             |             |             |             |             |             |
| 49 |               |                  |             |             |             |             |             |             |             |
| 50 |               |                  |             |             |             |             |             |             |             |
| 51 |               |                  |             |             |             |             |             |             |             |
| 52 |               |                  |             |             |             |             |             |             |             |
| 53 |               |                  |             |             |             |             |             |             |             |
| 54 |               |                  |             |             |             |             |             |             |             |
| 55 |               |                  |             |             |             |             |             |             |             |
| 56 |               |                  |             |             |             |             |             |             |             |
| 57 |               |                  |             |             |             |             |             |             |             |
| 58 |               |                  |             |             |             |             |             |             |             |
| 59 |               |                  |             |             |             |             |             |             |             |
| 60 |               |                  |             |             |             |             |             |             |             |

|    | <b>2014</b> | <b>2015</b> | <b>2016</b> | <b>2017</b> |
|----|-------------|-------------|-------------|-------------|
| 1  |             |             |             |             |
| 2  |             |             |             |             |
| 3  | 105         | 90          | 106         | 84          |
| 4  | 7           | 3           | 10          | 10          |
| 5  | 12          | 7           | 13          | 17          |
| 6  | 29          | 24          | 31          | 31          |
| 7  | 57          | 35          | 57          | 44          |
| 8  | 62          | 75          | 70          | 58          |
| 9  | 104         | 120         | 125         | 102         |
| 10 | 129         | 176         | 178         | 207         |
| 11 | 273         | 258         | 292         | 264         |
| 12 | 433         | 462         | 452         | 403         |
| 13 | 629         | 677         | 668         | 687         |
| 14 | 910         | 904         | 935         | 952         |
| 15 | 1220        | 1179        | 1275        | 1277        |
| 16 | 1851        | 1965        | 1923        | 1887        |
| 17 | 2391        | 2617        | 2573        | 2636        |
| 18 | 3630        | 3666        | 3619        | 3726        |
| 19 | 4828        | 4992        | 4800        | 4894        |
| 20 | 5308        | 5596        | 5505        | 5730        |
| 21 | 4160        | 4689        | 4209        | 4422        |
| 22 | 1459        | 1739        | 1764        | 1871        |
| 23 | 353         | 399         | 363         | 323         |
| 24 |             |             |             |             |
| 25 | 127         | 117         | 115         | 118         |
| 26 | 16          | 12          | 19          | 7           |
| 27 | 20          | 12          | 13          | 19          |
| 28 | 52          | 59          | 67          | 53          |
| 29 | 113         | 100         | 108         | 98          |
| 30 | 146         | 159         | 206         | 167         |
| 31 | 176         | 234         | 238         | 259         |
| 32 | 291         | 288         | 292         | 339         |
| 33 | 472         | 448         | 530         | 446         |
| 34 | 659         | 683         | 721         | 735         |
| 35 | 890         | 946         | 1031        | 982         |
| 36 | 1249        | 1329        | 1367        | 1304        |
| 37 | 1750        | 1795        | 1807        | 1799        |
| 38 | 2624        | 2805        | 2844        | 2603        |
| 39 | 3163        | 3404        | 3245        | 3403        |
| 40 | 3924        | 4079        | 3843        | 4128        |
| 41 | 4316        | 4535        | 4547        | 4619        |
| 42 | 3732        | 3946        | 3827        | 4064        |
| 43 | 2049        | 2319        | 2223        | 2334        |
| 44 | 454         | 568         | 624         | 679         |
| 45 | 65          | 62          | 86          | 89          |
| 46 |             |             |             |             |
| 47 |             |             |             |             |
| 48 |             |             |             |             |
| 49 |             |             |             |             |
| 50 |             |             |             |             |
| 51 |             |             |             |             |
| 52 |             |             |             |             |
| 53 |             |             |             |             |
| 54 |             |             |             |             |
| 55 |             |             |             |             |
| 56 |             |             |             |             |
| 57 |             |             |             |             |
| 58 |             |             |             |             |
| 59 |             |             |             |             |
| 60 |             |             |             |             |

|    | <b>Gender</b> | <b>Age Group</b> | <b>2007</b> | <b>2008</b> | <b>2009</b> | <b>2010</b> | <b>2011</b> | <b>2012</b> | <b>2013</b> |
|----|---------------|------------------|-------------|-------------|-------------|-------------|-------------|-------------|-------------|
| 1  |               |                  |             |             |             |             |             |             |             |
| 2  |               |                  |             |             |             |             |             |             |             |
| 3  | Female        | 0 - 4            | 5           | 3           | 4           | 2           | 7           | 6           | 6           |
| 4  | Female        | 5 - 9            | 4           | 7           | 5           | 2           | 2           | 3           | 1           |
| 5  | Female        | 10 - 14          | 6           | 8           | 4           | 4           | 5           | 1           | 5           |
| 6  | Female        | 15 - 19          | 8           | 11          | 9           | 9           | 11          | 4           | 11          |
| 7  | Female        | 20 - 24          | 15          | 12          | 10          | 11          | 12          | 9           | 8           |
| 8  | Female        | 25 - 29          | 23          | 14          | 21          | 14          | 24          | 27          | 19          |
| 9  | Female        | 30 - 34          | 49          | 39          | 45          | 40          | 39          | 39          | 48          |
| 10 | Female        | 35 - 39          | 103         | 103         | 90          | 85          | 96          | 66          | 84          |
| 11 | Female        | 40 - 44          | 192         | 186         | 200         | 192         | 160         | 180         | 150         |
| 12 | Female        | 45 - 49          | 360         | 311         | 314         | 297         | 330         | 291         | 287         |
| 13 | Female        | 50 - 54          | 490         | 460         | 498         | 482         | 510         | 500         | 502         |
| 14 | Female        | 55 - 59          | 706         | 741         | 690         | 671         | 665         | 691         | 688         |
| 15 | Female        | 60 - 64          | 1147        | 1141        | 1121        | 1133        | 1088        | 1058        | 1037        |
| 16 | Female        | 65 - 69          | 1592        | 1509        | 1455        | 1478        | 1431        | 1529        | 1546        |
| 17 | Female        | 70 - 74          | 2181        | 2180        | 2106        | 2099        | 1995        | 2125        | 2085        |
| 18 | Female        | 75 - 79          | 3014        | 3181        | 2906        | 2845        | 2834        | 2952        | 2878        |
| 19 | Female        | 80 - 84          | 3913        | 3867        | 3639        | 3744        | 3662        | 3897        | 3721        |
| 20 | Female        | 85 - 89          | 3872        | 4061        | 4007        | 3790        | 3837        | 4074        | 4020        |
| 21 | Female        | 90 - 94          | 2575        | 2431        | 2375        | 2475        | 2661        | 2990        | 3023        |
| 22 | Female        | 95 - 99          | 1040        | 1066        | 998         | 1080        | 1093        | 1127        | 1066        |
| 23 | Female        | 100+             | 179         | 170         | 218         | 202         | 209         | 224         | 226         |
| 24 |               |                  |             |             |             |             |             |             |             |
| 25 |               |                  |             |             |             |             |             |             |             |
| 26 |               |                  |             |             |             |             |             |             |             |
| 27 |               |                  |             |             |             |             |             |             |             |
| 28 |               |                  |             |             |             |             |             |             |             |
| 29 | Male          | 0 - 4            | 10          | 5           | 3           | 7           | 5           | 10          | 6           |
| 30 | Male          | 5 - 9            | 1           | 4           | 5           | 6           | 4           | 3           | 3           |
| 31 | Male          | 10 - 14          | 9           | 5           | 2           | 1           | 5           | 4           | 8           |
| 32 | Male          | 15 - 19          | 10          | 10          | 10          | 9           | 10          | 11          | 7           |
| 33 | Male          | 20 - 24          | 23          | 15          | 9           | 15          | 15          | 6           | 8           |
| 34 | Male          | 25 - 29          | 23          | 27          | 21          | 36          | 32          | 18          | 22          |
| 35 | Male          | 30 - 34          | 65          | 40          | 44          | 46          | 52          | 61          | 52          |
| 36 | Male          | 35 - 39          | 127         | 132         | 111         | 109         | 92          | 92          | 77          |
| 37 | Male          | 40 - 44          | 276         | 229         | 251         | 216         | 245         | 182         | 217         |
| 38 | Male          | 45 - 49          | 408         | 472         | 397         | 406         | 363         | 380         | 386         |
| 39 | Male          | 50 - 54          | 743         | 672         | 699         | 707         | 593         | 615         | 648         |
| 40 | Male          | 55 - 59          | 1156        | 1112        | 979         | 1010        | 967         | 967         | 984         |
| 41 | Male          | 60 - 64          | 1665        | 1647        | 1612        | 1619        | 1572        | 1507        | 1392        |
| 42 | Male          | 65 - 69          | 2094        | 2187        | 2059        | 1946        | 1975        | 2058        | 2101        |
| 43 | Male          | 70 - 74          | 2879        | 2763        | 2651        | 2550        | 2675        | 2554        | 2582        |
| 44 | Male          | 75 - 79          | 3378        | 3116        | 3123        | 3201        | 3050        | 3123        | 3120        |
| 45 | Male          | 80 - 84          | 3311        | 3233        | 3152        | 3285        | 3324        | 3203        | 3412        |
| 46 | Male          | 85 - 89          | 2352        | 2382        | 2513        | 2399        | 2600        | 2707        | 2688        |
| 47 | Male          | 90 - 94          | 1044        | 992         | 888         | 1095        | 1160        | 1298        | 1431        |
| 48 | Male          | 95 - 99          | 241         | 256         | 293         | 282         | 292         | 288         | 297         |
| 49 | Male          | 100+             | 21          | 37          | 29          | 31          | 28          | 34          | 33          |
| 50 |               |                  |             |             |             |             |             |             |             |
| 51 |               |                  |             |             |             |             |             |             |             |
| 52 |               |                  |             |             |             |             |             |             |             |
| 53 |               |                  |             |             |             |             |             |             |             |
| 54 |               |                  |             |             |             |             |             |             |             |
| 55 |               |                  |             |             |             |             |             |             |             |
| 56 |               |                  |             |             |             |             |             |             |             |
| 57 |               |                  |             |             |             |             |             |             |             |
| 58 |               |                  |             |             |             |             |             |             |             |
| 59 |               |                  |             |             |             |             |             |             |             |
| 60 |               |                  |             |             |             |             |             |             |             |

|    | <b>2014</b> | <b>2015</b> | <b>2016</b> | <b>2017</b> |
|----|-------------|-------------|-------------|-------------|
| 1  |             |             |             |             |
| 2  |             |             |             |             |
| 3  | 2           | 2           | 2           | 7           |
| 4  | 2           | 1           | 2           | 3           |
| 5  | 5           | 2           | 4           | 6           |
| 6  | 8           | 5           | 7           | 7           |
| 7  | 8           | 9           | 10          | 10          |
| 8  | 14          | 26          | 20          | 14          |
| 9  | 37          | 45          | 42          | 39          |
| 10 | 59          | 79          | 80          | 73          |
| 11 | 169         | 134         | 163         | 131         |
| 12 | 286         | 312         | 268         | 249         |
| 13 | 462         | 482         | 478         | 513         |
| 14 | 719         | 701         | 702         | 720         |
| 15 | 959         | 932         | 986         | 1021        |
| 16 | 1504        | 1576        | 1538        | 1513        |
| 17 | 1945        | 2100        | 2070        | 2119        |
| 18 | 2810        | 2871        | 2843        | 2930        |
| 19 | 3648        | 3771        | 3612        | 3736        |
| 20 | 3945        | 4184        | 4123        | 4316        |
| 21 | 3030        | 3387        | 3037        | 3311        |
| 22 | 1025        | 1210        | 1213        | 1316        |
| 23 | 239         | 241         | 228         | 205         |
| 24 |             |             |             |             |
| 25 | 5           | 3           | 3           | 4           |
| 26 | 6           | 4           | 7           | 3           |
| 27 | 4           | 7           | 3           | 5           |
| 28 | 6           | 9           | 7           | 10          |
| 29 | 10          | 10          | 12          | 7           |
| 30 | 17          | 28          | 36          | 20          |
| 31 | 36          | 59          | 44          | 54          |
| 32 | 91          | 82          | 67          | 98          |
| 33 | 203         | 188         | 191         | 163         |
| 34 | 367         | 371         | 389         | 390         |
| 35 | 603         | 639         | 655         | 602         |
| 36 | 947         | 953         | 1022        | 945         |
| 37 | 1379        | 1435        | 1398        | 1413        |
| 38 | 2131        | 2252        | 2237        | 2085        |
| 39 | 2526        | 2679        | 2582        | 2726        |
| 40 | 3095        | 3187        | 3005        | 3256        |
| 41 | 3306        | 3482        | 3499        | 3594        |
| 42 | 2803        | 2898        | 2841        | 3054        |
| 43 | 1462        | 1654        | 1572        | 1639        |
| 44 | 307         | 354         | 398         | 454         |
| 45 | 41          | 37          | 56          | 55          |
| 46 |             |             |             |             |
| 47 |             |             |             |             |
| 48 |             |             |             |             |
| 49 |             |             |             |             |
| 50 |             |             |             |             |
| 51 |             |             |             |             |
| 52 |             |             |             |             |
| 53 |             |             |             |             |
| 54 |             |             |             |             |
| 55 |             |             |             |             |
| 56 |             |             |             |             |
| 57 |             |             |             |             |
| 58 |             |             |             |             |
| 59 |             |             |             |             |
| 60 |             |             |             |             |

|    | <b>Gender</b> | <b>Age Group</b> | <b>2007</b> | <b>2008</b> | <b>2009</b> | <b>2010</b> | <b>2011</b> | <b>2012</b> | <b>2013</b> |
|----|---------------|------------------|-------------|-------------|-------------|-------------|-------------|-------------|-------------|
| 1  |               |                  |             |             |             |             |             |             |             |
| 2  |               |                  |             |             |             |             |             |             |             |
| 3  | Female        | 0 - 4            | 17          | 10          | 13          | 10          | 11          | 14          | 12          |
| 4  | Female        | 5 - 9            | 6           | 7           | 5           | 4           | 6           | 5           | 2           |
| 5  | Female        | 10 - 14          | 7           | 9           | 7           | 7           | 8           | 2           | 6           |
| 6  | Female        | 15 - 19          | 12          | 16          | 11          | 16          | 15          | 5           | 17          |
| 7  | Female        | 20 - 24          | 20          | 18          | 17          | 16          | 18          | 13          | 11          |
| 8  | Female        | 25 - 29          | 28          | 19          | 29          | 23          | 37          | 33          | 22          |
| 9  | Female        | 30 - 34          | 54          | 52          | 53          | 58          | 46          | 53          | 59          |
| 10 | Female        | 35 - 39          | 125         | 125         | 106         | 102         | 109         | 80          | 96          |
| 11 | Female        | 40 - 44          | 216         | 212         | 230         | 217         | 182         | 216         | 172         |
| 12 | Female        | 45 - 49          | 412         | 353         | 352         | 339         | 369         | 327         | 332         |
| 13 | Female        | 50 - 54          | 550         | 539         | 565         | 542         | 574         | 562         | 562         |
| 14 | Female        | 55 - 59          | 800         | 831         | 769         | 759         | 754         | 769         | 788         |
| 15 | Female        | 60 - 64          | 1,288       | 1,278       | 1,284       | 1,297       | 1,244       | 1,180       | 1,145       |
| 16 | Female        | 65 - 69          | 1,820       | 1,713       | 1,659       | 1,691       | 1,629       | 1,705       | 1,738       |
| 17 | Female        | 70 - 74          | 2,537       | 2,510       | 2,433       | 2,427       | 2,334       | 2,413       | 2,412       |
| 18 | Female        | 75 - 79          | 3,590       | 3,790       | 3,466       | 3,434       | 3,349       | 3,474       | 3,387       |
| 19 | Female        | 80 - 84          | 4,811       | 4,735       | 4,494       | 4,543       | 4,345       | 4,685       | 4,466       |
| 20 | Female        | 85 - 89          | 4,857       | 5,084       | 5,039       | 4,785       | 4,769       | 4,993       | 4,936       |
| 21 | Female        | 90 - 94          | 3,307       | 3,175       | 3,067       | 3,260       | 3,396       | 3,788       | 3,808       |
| 22 | Female        | 95 - 99          | 1,377       | 1,395       | 1,326       | 1,429       | 1,409       | 1,475       | 1,383       |
| 23 | Female        | 100+             | 247         | 237         | 279         | 274         | 265         | 300         | 313         |
| 24 |               |                  |             |             |             |             |             |             |             |
| 25 |               |                  |             |             |             |             |             |             |             |
| 26 |               |                  |             |             |             |             |             |             |             |
| 27 |               |                  |             |             |             |             |             |             |             |
| 28 |               |                  |             |             |             |             |             |             |             |
| 29 | Male          | 0 - 4            | 19          | 16          | 8           | 13          | 12          | 14          | 14          |
| 30 | Male          | 5 - 9            | 4           | 7           | 7           | 9           | 9           | 5           | 5           |
| 31 | Male          | 10 - 14          | 10          | 6           | 3           | 2           | 9           | 5           | 11          |
| 32 | Male          | 15 - 19          | 17          | 21          | 15          | 15          | 18          | 16          | 12          |
| 33 | Male          | 20 - 24          | 35          | 27          | 20          | 25          | 23          | 12          | 13          |
| 34 | Male          | 25 - 29          | 35          | 37          | 32          | 43          | 44          | 26          | 31          |
| 35 | Male          | 30 - 34          | 82          | 58          | 57          | 61          | 66          | 76          | 71          |
| 36 | Male          | 35 - 39          | 159         | 159         | 133         | 134         | 113         | 127         | 108         |
| 37 | Male          | 40 - 44          | 324         | 267         | 307         | 275         | 296         | 218         | 287         |
| 38 | Male          | 45 - 49          | 464         | 535         | 471         | 463         | 429         | 444         | 450         |
| 39 | Male          | 50 - 54          | 834         | 784         | 786         | 810         | 681         | 704         | 738         |
| 40 | Male          | 55 - 59          | 1,277       | 1,245       | 1,115       | 1,170       | 1,094       | 1,081       | 1,113       |
| 41 | Male          | 60 - 64          | 1,893       | 1,849       | 1,820       | 1,840       | 1,775       | 1,699       | 1,561       |
| 42 | Male          | 65 - 69          | 2,355       | 2,466       | 2,354       | 2,231       | 2,280       | 2,319       | 2,420       |
| 43 | Male          | 70 - 74          | 3,299       | 3,184       | 3,045       | 3,010       | 3,091       | 2,963       | 2,928       |
| 44 | Male          | 75 - 79          | 3,977       | 3,763       | 3,671       | 3,741       | 3,565       | 3,670       | 3,661       |
| 45 | Male          | 80 - 84          | 3,996       | 3,923       | 3,874       | 3,992       | 3,979       | 3,896       | 4,082       |
| 46 | Male          | 85 - 89          | 2,918       | 2,973       | 3,168       | 3,029       | 3,235       | 3,335       | 3,302       |
| 47 | Male          | 90 - 94          | 1,337       | 1,263       | 1,177       | 1,433       | 1,467       | 1,665       | 1,835       |
| 48 | Male          | 95 - 99          | 330         | 342         | 395         | 396         | 394         | 395         | 383         |
| 49 | Male          | 100+             | 30          | 49          | 46          | 59          | 45          | 53          | 47          |
| 50 |               |                  |             |             |             |             |             |             |             |
| 51 |               |                  |             |             |             |             |             |             |             |
| 52 |               |                  |             |             |             |             |             |             |             |
| 53 |               |                  |             |             |             |             |             |             |             |
| 54 |               |                  |             |             |             |             |             |             |             |
| 55 |               |                  |             |             |             |             |             |             |             |
| 56 |               |                  |             |             |             |             |             |             |             |
| 57 |               |                  |             |             |             |             |             |             |             |
| 58 |               |                  |             |             |             |             |             |             |             |
| 59 |               |                  |             |             |             |             |             |             |             |
| 60 |               |                  |             |             |             |             |             |             |             |

|    | <b>2014</b> | <b>2015</b> | <b>2016</b> | <b>2017</b> |
|----|-------------|-------------|-------------|-------------|
| 1  |             |             |             |             |
| 2  |             |             |             |             |
| 3  | 6           | 10          | 11          | 14          |
| 4  | 3           | 1           | 3           | 3           |
| 5  | 5           | 3           | 6           | 8           |
| 6  | 9           | 11          | 8           | 9           |
| 7  | 14          | 14          | 19          | 18          |
| 8  | 19          | 31          | 26          | 20          |
| 9  | 43          | 61          | 61          | 53          |
| 10 | 72          | 99          | 97          | 100         |
| 11 | 197         | 157         | 202         | 163         |
| 12 | 329         | 357         | 333         | 301         |
| 13 | 537         | 561         | 563         | 585         |
| 14 | 816         | 795         | 816         | 849         |
| 15 | 1,103       | 1,067       | 1,155       | 1,169       |
| 16 | 1,703       | 1,812       | 1,774       | 1,750       |
| 17 | 2,253       | 2,471       | 2,403       | 2,494       |
| 18 | 3,344       | 3,453       | 3,385       | 3,496       |
| 19 | 4,446       | 4,628       | 4,470       | 4,580       |
| 20 | 4,899       | 5,190       | 5,134       | 5,331       |
| 21 | 3,812       | 4,302       | 3,881       | 4,134       |
| 22 | 1,318       | 1,589       | 1,594       | 1,725       |
| 23 | 321         | 345         | 327         | 288         |
| 24 |             |             |             |             |
| 25 | 10          | 9           | 10          | 9           |
| 26 | 8           | 6           | 9           | 4           |
| 27 | 7           | 8           | 5           | 8           |
| 28 | 9           | 15          | 12          | 13          |
| 29 | 14          | 18          | 21          | 13          |
| 30 | 29          | 37          | 44          | 30          |
| 31 | 52          | 86          | 69          | 78          |
| 32 | 126         | 121         | 125         | 140         |
| 33 | 256         | 238         | 265         | 248         |
| 34 | 449         | 456         | 491         | 497         |
| 35 | 691         | 759         | 814         | 752         |
| 36 | 1,077       | 1,135       | 1,190       | 1,107       |
| 37 | 1,582       | 1,603       | 1,620       | 1,619       |
| 38 | 2,427       | 2,591       | 2,608       | 2,416       |
| 39 | 2,939       | 3,159       | 3,042       | 3,206       |
| 40 | 3,676       | 3,818       | 3,609       | 3,882       |
| 41 | 4,024       | 4,229       | 4,281       | 4,367       |
| 42 | 3,470       | 3,685       | 3,591       | 3,815       |
| 43 | 1,869       | 2,127       | 2,066       | 2,155       |
| 44 | 395         | 499         | 560         | 620         |
| 45 | 55          | 55          | 69          | 79          |
| 46 |             |             |             |             |
| 47 |             |             |             |             |
| 48 |             |             |             |             |
| 49 |             |             |             |             |
| 50 |             |             |             |             |
| 51 |             |             |             |             |
| 52 |             |             |             |             |
| 53 |             |             |             |             |
| 54 |             |             |             |             |
| 55 |             |             |             |             |
| 56 |             |             |             |             |
| 57 |             |             |             |             |
| 58 |             |             |             |             |
| 59 |             |             |             |             |
| 60 |             |             |             |             |

|    | <b>Gender</b> | <b>Age Group</b> | <b>2018 - 2019</b> | <b>2019 - 2020</b> | <b>2020 - 2021</b> | <b>2021 - 2022</b> | <b>2022 - 2023</b> | <b>2023 - 2024</b> |
|----|---------------|------------------|--------------------|--------------------|--------------------|--------------------|--------------------|--------------------|
| 1  |               |                  |                    |                    |                    |                    |                    |                    |
| 2  |               |                  |                    |                    |                    |                    |                    |                    |
| 3  | Female        | 0 - 4            | 92                 | 91                 | 88                 | 87                 | 85                 | 83                 |
| 4  | Female        | 5 - 9            | 5                  | 5                  | 5                  | 5                  | 5                  | 5                  |
| 5  | Female        | 10 - 14          | 11                 | 11                 | 11                 | 11                 | 11                 | 11                 |
| 6  | Female        | 15 - 19          | 26                 | 24                 | 24                 | 24                 | 24                 | 23                 |
| 7  | Female        | 20 - 24          | 42                 | 42                 | 41                 | 38                 | 37                 | 35                 |
| 8  | Female        | 25 - 29          | 73                 | 74                 | 73                 | 71                 | 68                 | 67                 |
| 9  | Female        | 30 - 34          | 116                | 118                | 119                | 121                | 122                | 122                |
| 10 | Female        | 35 - 39          | 166                | 167                | 168                | 167                | 168                | 168                |
| 11 | Female        | 40 - 44          | 220                | 217                | 217                | 220                | 226                | 229                |
| 12 | Female        | 45 - 49          | 404                | 384                | 369                | 349                | 329                | 317                |
| 13 | Female        | 50 - 54          | 661                | 646                | 626                | 612                | 595                | 570                |
| 14 | Female        | 55 - 59          | 941                | 941                | 944                | 936                | 923                | 904                |
| 15 | Female        | 60 - 64          | 1225               | 1233               | 1240               | 1248               | 1255               | 1261               |
| 16 | Female        | 65 - 69          | 1820               | 1777               | 1754               | 1745               | 1754               | 1763               |
| 17 | Female        | 70 - 74          | 2791               | 2833               | 2882               | 2912               | 2746               | 2660               |
| 18 | Female        | 75 - 79          | 3591               | 3602               | 3595               | 3644               | 3852               | 3949               |
| 19 | Female        | 80 - 84          | 4911               | 4911               | 4900               | 4838               | 4813               | 4832               |
| 20 | Female        | 85 - 89          | 5594               | 5623               | 5646               | 5663               | 5671               | 5730               |
| 21 | Female        | 90 - 94          | 4145               | 4184               | 4239               | 4297               | 4383               | 4427               |
| 22 | Female        | 95 - 99          | 1754               | 1794               | 1777               | 1792               | 1794               | 1801               |
| 23 | Female        | 100+             | 286                | 273                | 316                | 335                | 348                | 348                |
| 24 |               |                  |                    |                    |                    |                    |                    |                    |
| 25 |               |                  |                    |                    |                    |                    |                    |                    |
| 26 |               |                  |                    |                    |                    |                    |                    |                    |
| 27 |               |                  |                    |                    |                    |                    |                    |                    |
| 28 |               |                  |                    |                    |                    |                    |                    |                    |
| 29 | Male          | 0 - 4            | 111                | 109                | 106                | 104                | 102                | 101                |
| 30 | Male          | 5 - 9            | 10                 | 10                 | 10                 | 10                 | 10                 | 10                 |
| 31 | Male          | 10 - 14          | 15                 | 14                 | 14                 | 14                 | 14                 | 14                 |
| 32 | Male          | 15 - 19          | 49                 | 47                 | 43                 | 42                 | 40                 | 40                 |
| 33 | Male          | 20 - 24          | 97                 | 92                 | 88                 | 82                 | 75                 | 71                 |
| 34 | Male          | 25 - 29          | 144                | 140                | 136                | 129                | 124                | 119                |
| 35 | Male          | 30 - 34          | 218                | 219                | 219                | 220                | 220                | 218                |
| 36 | Male          | 35 - 39          | 312                | 311                | 312                | 311                | 311                | 313                |
| 37 | Male          | 40 - 44          | 400                | 398                | 402                | 407                | 415                | 423                |
| 38 | Male          | 45 - 49          | 597                | 572                | 549                | 524                | 500                | 481                |
| 39 | Male          | 50 - 54          | 887                | 862                | 826                | 802                | 771                | 738                |
| 40 | Male          | 55 - 59          | 1312               | 1303               | 1296               | 1272               | 1246               | 1214               |
| 41 | Male          | 60 - 64          | 1740               | 1737               | 1743               | 1742               | 1743               | 1743               |
| 42 | Male          | 65 - 69          | 2505               | 2432               | 2381               | 2361               | 2365               | 2364               |
| 43 | Male          | 70 - 74          | 3615               | 3659               | 3721               | 3737               | 3514               | 3389               |
| 44 | Male          | 75 - 79          | 3897               | 3942               | 3960               | 4061               | 4345               | 4494               |
| 45 | Male          | 80 - 84          | 4481               | 4522               | 4532               | 4493               | 4511               | 4540               |
| 46 | Male          | 85 - 89          | 4007               | 4082               | 4176               | 4243               | 4290               | 4392               |
| 47 | Male          | 90 - 94          | 2194               | 2250               | 2306               | 2387               | 2496               | 2591               |
| 48 | Male          | 95 - 99          | 630                | 683                | 713                | 747                | 765                | 783                |
| 49 | Male          | 100+             | 59                 | 57                 | 70                 | 82                 | 89                 | 94                 |
| 50 |               |                  |                    |                    |                    |                    |                    |                    |
| 51 |               |                  |                    |                    |                    |                    |                    |                    |
| 52 |               |                  |                    |                    |                    |                    |                    |                    |
| 53 |               |                  |                    |                    |                    |                    |                    |                    |
| 54 |               |                  |                    |                    |                    |                    |                    |                    |
| 55 |               |                  |                    |                    |                    |                    |                    |                    |
| 56 |               |                  |                    |                    |                    |                    |                    |                    |
| 57 |               |                  |                    |                    |                    |                    |                    |                    |
| 58 |               |                  |                    |                    |                    |                    |                    |                    |
| 59 |               |                  |                    |                    |                    |                    |                    |                    |
| 60 |               |                  |                    |                    |                    |                    |                    |                    |

|    | 2024 - 2025 | 2025 - 2026 | 2026 - 2027 | 2027 - 2028 | 2028 - 2029 | 2029 - 2030 | 2030 - 2031 | 2031 - 2032 |
|----|-------------|-------------|-------------|-------------|-------------|-------------|-------------|-------------|
| 1  |             |             |             |             |             |             |             |             |
| 2  |             |             |             |             |             |             |             |             |
| 3  | 82          | 79          | 77          | 75          | 74          | 72          | 70          | 69          |
| 4  | 5           | 5           | 5           | 5           | 5           | 5           | 5           | 5           |
| 5  | 11          | 9           | 9           | 9           | 9           | 9           | 9           | 8           |
| 6  | 23          | 23          | 23          | 22          | 23          | 21          | 21          | 21          |
| 7  | 33          | 33          | 33          | 33          | 33          | 33          | 33          | 33          |
| 8  | 65          | 63          | 62          | 58          | 56          | 53          | 53          | 52          |
| 9  | 123         | 122         | 120         | 116         | 114         | 109         | 106         | 103         |
| 10 | 170         | 170         | 171         | 174         | 172         | 171         | 169         | 164         |
| 11 | 231         | 231         | 230         | 228         | 228         | 230         | 228         | 230         |
| 12 | 314         | 313         | 315         | 322         | 328         | 328         | 328         | 326         |
| 13 | 539         | 517         | 489         | 461         | 443         | 438         | 437         | 439         |
| 14 | 883         | 855         | 837         | 812         | 777         | 738         | 705         | 667         |
| 15 | 1264        | 1270        | 1260        | 1246        | 1224        | 1197        | 1161        | 1137        |
| 16 | 1779        | 1803        | 1825        | 1839        | 1853        | 1861        | 1873        | 1864        |
| 17 | 2607        | 2583        | 2580        | 2601        | 2623        | 2654        | 2683        | 2713        |
| 18 | 4018        | 4098        | 4153        | 3929        | 3817        | 3755        | 3732        | 3739        |
| 19 | 4861        | 4869        | 4946        | 5251        | 5405        | 5518        | 5643        | 5731        |
| 20 | 5762        | 5777        | 5730        | 5729        | 5792        | 5861        | 5900        | 6017        |
| 21 | 4475        | 4526        | 4588        | 4643        | 4729        | 4796        | 4849        | 4845        |
| 22 | 1829        | 1865        | 1911        | 1968        | 2001        | 2046        | 2099        | 2163        |
| 23 | 353         | 356         | 366         | 368         | 372         | 385         | 399         | 418         |
| 24 |             |             |             |             |             |             |             |             |
| 25 | 99          | 97          | 95          | 91          | 89          | 88          | 85          | 84          |
| 26 | 10          | 10          | 10          | 10          | 10          | 10          | 10          | 10          |
| 27 | 14          | 13          | 13          | 13          | 12          | 12          | 11          | 11          |
| 28 | 39          | 39          | 39          | 38          | 37          | 36          | 35          | 34          |
| 29 | 68          | 67          | 65          | 64          | 65          | 65          | 62          | 63          |
| 30 | 114         | 109         | 103         | 97          | 93          | 89          | 86          | 85          |
| 31 | 215         | 210         | 205         | 198         | 191         | 185         | 179         | 171         |
| 32 | 315         | 318         | 322         | 325         | 323         | 319         | 315         | 307         |
| 33 | 424         | 424         | 424         | 425         | 429         | 435         | 437         | 442         |
| 34 | 477         | 477         | 481         | 488         | 494         | 491         | 491         | 488         |
| 35 | 703         | 670         | 638         | 606         | 580         | 573         | 571         | 573         |
| 36 | 1180        | 1133        | 1100        | 1059        | 1013        | 966         | 924         | 879         |
| 37 | 1736        | 1732        | 1707        | 1675        | 1638        | 1598        | 1540        | 1499        |
| 38 | 2371        | 2399        | 2423        | 2433        | 2442        | 2442        | 2445        | 2420        |
| 39 | 3308        | 3260        | 3253        | 3274        | 3291        | 3315        | 3353        | 3381        |
| 40 | 4571        | 4670        | 4710        | 4457        | 4323        | 4247        | 4207        | 4218        |
| 41 | 4624        | 4673        | 4821        | 5196        | 5410        | 5537        | 5690        | 5770        |
| 42 | 4473        | 4522        | 4516        | 4569        | 4653        | 4793        | 4885        | 5072        |
| 43 | 2672        | 2769        | 2856        | 2929        | 3041        | 3137        | 3211        | 3239        |
| 44 | 819         | 855         | 906         | 964         | 1014        | 1065        | 1125        | 1182        |
| 45 | 100         | 108         | 115         | 120         | 125         | 135         | 145         | 160         |
| 46 |             |             |             |             |             |             |             |             |
| 47 |             |             |             |             |             |             |             |             |
| 48 |             |             |             |             |             |             |             |             |
| 49 |             |             |             |             |             |             |             |             |
| 50 |             |             |             |             |             |             |             |             |
| 51 |             |             |             |             |             |             |             |             |
| 52 |             |             |             |             |             |             |             |             |
| 53 |             |             |             |             |             |             |             |             |
| 54 |             |             |             |             |             |             |             |             |
| 55 |             |             |             |             |             |             |             |             |
| 56 |             |             |             |             |             |             |             |             |
| 57 |             |             |             |             |             |             |             |             |
| 58 |             |             |             |             |             |             |             |             |
| 59 |             |             |             |             |             |             |             |             |
| 60 |             |             |             |             |             |             |             |             |



|    | 2032 - 2033 | 2033 - 2034 | 2034 - 2035 | 2035 - 2036 | 2036 - 2037 | 2037 - 2038 | 2038 - 2039 | 2039 - 2040 |
|----|-------------|-------------|-------------|-------------|-------------|-------------|-------------|-------------|
| 1  |             |             |             |             |             |             |             |             |
| 2  |             |             |             |             |             |             |             |             |
| 3  | 67          | 66          | 66          | 65          | 63          | 62          | 60          | 60          |
| 4  | 5           | 5           | 5           | 5           | 5           | 5           | 5           | 5           |
| 5  | 9           | 8           | 8           | 8           | 8           | 8           | 8           | 8           |
| 6  | 19          | 19          | 19          | 19          | 18          | 18          | 18          | 18          |
| 7  | 33          | 32          | 32          | 31          | 30          | 28          | 28          | 28          |
| 8  | 52          | 54          | 56          | 55          | 55          | 55          | 54          | 53          |
| 9  | 97          | 95          | 91          | 91          | 90          | 90          | 92          | 92          |
| 10 | 159         | 155         | 150         | 145         | 139         | 133         | 127         | 125         |
| 11 | 233         | 229         | 228         | 224         | 218         | 210         | 204         | 197         |
| 12 | 323         | 324         | 326         | 324         | 326         | 329         | 325         | 322         |
| 13 | 450         | 458         | 458         | 456         | 454         | 449         | 451         | 452         |
| 14 | 629         | 607         | 598         | 596         | 600         | 615         | 624         | 625         |
| 15 | 1104        | 1059        | 1008        | 965         | 912         | 862         | 831         | 820         |
| 16 | 1847        | 1819        | 1780        | 1730        | 1696        | 1652        | 1588        | 1514        |
| 17 | 2739        | 2765        | 2784        | 2808        | 2798        | 2778        | 2740        | 2688        |
| 18 | 3784        | 3831        | 3890        | 3943        | 3999        | 4049        | 4097        | 4134        |
| 19 | 5448        | 5319        | 5256        | 5247        | 5282        | 5369        | 5458        | 5563        |
| 20 | 6444        | 6677        | 6849        | 7015        | 7131        | 6831        | 6717        | 6682        |
| 21 | 4888        | 5000        | 5114        | 5187        | 5322        | 5802        | 6072        | 6260        |
| 22 | 2226        | 2297        | 2360        | 2418        | 2444        | 2502        | 2606        | 2707        |
| 23 | 437         | 449         | 472         | 497         | 527         | 554         | 584         | 614         |
| 24 |             |             |             |             |             |             |             |             |
| 25 | 83          | 82          | 80          | 79          | 77          | 77          | 76          | 76          |
| 26 | 8           | 8           | 7           | 7           | 6           | 6           | 5           | 5           |
| 27 | 11          | 11          | 11          | 10          | 10          | 10          | 10          | 10          |
| 28 | 33          | 32          | 31          | 31          | 30          | 30          | 30          | 29          |
| 29 | 61          | 61          | 59          | 58          | 57          | 54          | 53          | 52          |
| 30 | 86          | 85          | 85          | 85          | 86          | 85          | 84          | 83          |
| 31 | 163         | 156         | 152         | 149         | 147         | 149         | 150         | 149         |
| 32 | 298         | 290         | 281         | 273         | 262         | 249         | 239         | 234         |
| 33 | 447         | 443         | 439         | 433         | 421         | 410         | 399         | 386         |
| 34 | 488         | 492         | 497         | 498         | 504         | 507         | 503         | 497         |
| 35 | 581         | 588         | 586         | 584         | 581         | 578         | 583         | 588         |
| 36 | 834         | 801         | 791         | 790         | 792         | 805         | 817         | 815         |
| 37 | 1447        | 1391        | 1329        | 1274        | 1216        | 1158        | 1113        | 1102        |
| 38 | 2387        | 2342        | 2292        | 2214        | 2165        | 2095        | 2019        | 1935        |
| 39 | 3410        | 3437        | 3450        | 3467        | 3441        | 3407        | 3351        | 3290        |
| 40 | 4271        | 4315        | 4371        | 4441        | 4498        | 4556        | 4613        | 4647        |
| 41 | 5498        | 5372        | 5311        | 5296        | 5345        | 5445        | 5535        | 5636        |
| 42 | 5538        | 5821        | 6002        | 6180        | 6274        | 6043        | 5960        | 5948        |
| 43 | 3316        | 3430        | 3587        | 3694        | 3872        | 4309        | 4578        | 4758        |
| 44 | 1237        | 1310        | 1376        | 1432        | 1459        | 1522        | 1611        | 1721        |
| 45 | 175         | 188         | 202         | 220         | 235         | 256         | 282         | 301         |
| 46 |             |             |             |             |             |             |             |             |
| 47 |             |             |             |             |             |             |             |             |
| 48 |             |             |             |             |             |             |             |             |
| 49 |             |             |             |             |             |             |             |             |
| 50 |             |             |             |             |             |             |             |             |
| 51 |             |             |             |             |             |             |             |             |
| 52 |             |             |             |             |             |             |             |             |
| 53 |             |             |             |             |             |             |             |             |
| 54 |             |             |             |             |             |             |             |             |
| 55 |             |             |             |             |             |             |             |             |
| 56 |             |             |             |             |             |             |             |             |
| 57 |             |             |             |             |             |             |             |             |
| 58 |             |             |             |             |             |             |             |             |
| 59 |             |             |             |             |             |             |             |             |
| 60 |             |             |             |             |             |             |             |             |

|    |                    |
|----|--------------------|
| 1  |                    |
| 2  | <b>2040 - 2041</b> |
| 3  | 60                 |
| 4  | 5                  |
| 5  | 7                  |
| 6  | 18                 |
| 7  | 28                 |
| 8  | 53                 |
| 9  | 92                 |
| 10 | 122                |
| 11 | 190                |
| 12 | 316                |
| 13 | 452                |
| 14 | 624                |
| 15 | 819                |
| 16 | 1451               |
| 17 | 2616               |
| 18 | 4179               |
| 19 | 5660               |
| 20 | 6712               |
| 21 | 6413               |
| 22 | 2780               |
| 23 | 643                |
| 24 |                    |
| 25 | 74                 |
| 26 | 5                  |
| 27 | 10                 |
| 28 | 28                 |
| 29 | 52                 |
| 30 | 82                 |
| 31 | 150                |
| 32 | 230                |
| 33 | 375                |
| 34 | 489                |
| 35 | 592                |
| 36 | 814                |
| 37 | 1105               |
| 38 | 1860               |
| 39 | 3191               |
| 40 | 4689               |
| 41 | 5755               |
| 42 | 5983               |
| 43 | 4916               |
| 44 | 1795               |
| 45 | 321                |
| 46 |                    |
| 47 |                    |
| 48 |                    |
| 49 |                    |
| 50 |                    |
| 51 |                    |
| 52 |                    |
| 53 |                    |
| 54 |                    |
| 55 |                    |
| 56 |                    |
| 57 |                    |
| 58 |                    |
| 59 |                    |
| 60 |                    |

For peer review only

1  
2  
3  
4  
5  
6  
7  
8  
9  
10  
11  
12  
13  
14  
15  
16  
17  
18  
19  
20  
21  
22  
23  
24  
25  
26  
27  
28  
29  
30  
31  
32  
33  
34  
35  
36  
37  
38  
39  
40  
41  
42  
43  
44  
45  
46  
47  
48  
49  
50  
51  
52  
53  
54  
55  
56  
57  
58  
59  
60

|               | Baseline |        |        |        |        |        |        |
|---------------|----------|--------|--------|--------|--------|--------|--------|
|               | 2007     | 2008   | 2009   | 2010   | 2011   | 2012   | 2013   |
| 75% of Deaths | 41,988   | 41,775 | 40,391 | 40,475 | 40,246 | 41,203 | 41,025 |

For peer review only

1  
2  
3  
4  
5  
6  
7  
8  
9  
10  
11  
12  
13  
14  
15  
16  
17  
18  
19  
20  
21  
22  
23  
24  
25  
26  
27  
28  
29  
30  
31  
32  
33  
34  
35  
36  
37  
38  
39  
40  
41  
42  
43  
44  
45  
46  
47  
48  
49  
50  
51  
52  
53  
54  
55  
56  
57  
58  
59  
60

| 2014   | 2015   | 2016   | 2017   | 2018   | 2019   | 2020   | 2021   | 2022   |
|--------|--------|--------|--------|--------|--------|--------|--------|--------|
| 40,679 | 43,180 | 42,541 | 43,403 | 42,116 | 42,293 | 42,478 | 42,664 | 42,866 |

For peer review only

1  
2  
3  
4  
5  
6  
7  
8  
9  
10  
11  
12  
13  
14  
15  
16  
17  
18  
19  
20  
21  
22  
23  
24  
25  
26  
27  
28  
29  
30  
31  
32  
33  
34  
35  
36  
37  
38  
39  
40  
41  
42  
43  
44  
45  
46  
47  
48  
49  
50  
51  
52  
53  
54  
55  
56  
57  
58  
59  
60

| Projected |        |        |        |        |        |        |        |        |  |
|-----------|--------|--------|--------|--------|--------|--------|--------|--------|--|
| 2023      | 2024   | 2025   | 2026   | 2027   | 2028   | 2029   | 2030   | 2031   |  |
| 43,078    | 43,319 | 43,592 | 43,899 | 44,190 | 44,513 | 44,864 | 45,233 | 45,624 |  |

For peer review only

1  
2  
3  
4  
5  
6  
7  
8  
9  
10  
11  
12  
13  
14  
15  
16  
17  
18  
19  
20  
21  
22  
23  
24  
25  
26  
27  
28  
29  
30  
31  
32  
33  
34  
35  
36  
37  
38  
39  
40  
41  
42  
43  
44  
45  
46  
47  
48  
49  
50  
51  
52  
53  
54  
55  
56  
57  
58  
59  
60

|  | <b>2032</b> | <b>2033</b> | <b>2034</b> | <b>2035</b> | <b>2036</b> | <b>2037</b> | <b>2038</b> | <b>2039</b> | <b>2040</b> |
|--|-------------|-------------|-------------|-------------|-------------|-------------|-------------|-------------|-------------|
|  | 46,024      | 46,442      | 46,867      | 47,283      | 47,696      | 48,114      | 48,525      | 48,922      | 49,317      |

For peer review only

1  
2  
3  
4  
5  
6  
7  
8  
9  
10  
11  
12  
13  
14  
15  
16  
17  
18  
19  
20  
21  
22  
23  
24  
25  
26  
27  
28  
29  
30  
31  
32  
33  
34  
35  
36  
37  
38  
39  
40  
41  
42  
43  
44  
45  
46  
47  
48  
49  
50  
51  
52  
53  
54  
55  
56  
57  
58  
59  
60

| Group                           | Baseline      |               |               |               |               |               |
|---------------------------------|---------------|---------------|---------------|---------------|---------------|---------------|
|                                 | 2007          | 2008          | 2009          | 2010          | 2011          | 2012          |
| Females 0 - 4                   | 5             | 3             | 4             | 2             | 7             | 6             |
| Females 5 - 9                   | 4             | 7             | 5             | 2             | 2             | 3             |
| Females 10 - 14                 | 6             | 8             | 4             | 4             | 5             | 1             |
| Females 15 - 19                 | 8             | 11            | 9             | 9             | 11            | 4             |
| Females 20 - 24                 | 15            | 12            | 10            | 11            | 12            | 9             |
| Females 25 - 29                 | 23            | 14            | 21            | 14            | 24            | 27            |
| Females 30 - 34                 | 49            | 39            | 45            | 40            | 39            | 39            |
| Females 35 - 39                 | 103           | 103           | 90            | 85            | 96            | 66            |
| Females 40 - 44                 | 192           | 186           | 200           | 192           | 160           | 180           |
| Females 45 - 49                 | 360           | 311           | 314           | 297           | 330           | 291           |
| Females 50 - 54                 | 490           | 460           | 498           | 482           | 510           | 500           |
| Females 55 - 59                 | 706           | 741           | 690           | 671           | 665           | 691           |
| Females 60 - 64                 | 1,147         | 1,141         | 1,121         | 1,133         | 1,088         | 1,058         |
| Females 65 - 69                 | 1,592         | 1,509         | 1,455         | 1,478         | 1,431         | 1,529         |
| Females 70 - 74                 | 2,181         | 2,180         | 2,106         | 2,099         | 1,995         | 2,125         |
| Females 75 - 79                 | 3,014         | 3,181         | 2,906         | 2,845         | 2,834         | 2,952         |
| Females 80 - 84                 | 3,913         | 3,867         | 3,639         | 3,744         | 3,662         | 3,897         |
| Females 85 - 89                 | 3,872         | 4,061         | 4,007         | 3,790         | 3,837         | 4,074         |
| Females 90 - 94                 | 2,575         | 2,431         | 2,375         | 2,475         | 2,661         | 2,990         |
| Females 95 - 99                 | 1,040         | 1,066         | 998           | 1,080         | 1,093         | 1,127         |
| Females 100+                    | 179           | 170           | 218           | 202           | 209           | 224           |
| Males 0 - 4                     | 10            | 5             | 3             | 7             | 5             | 10            |
| Males 5 - 9                     | 1             | 4             | 5             | 6             | 4             | 3             |
| Males 10 - 14                   | 9             | 5             | 2             | 1             | 5             | 4             |
| Males 15 - 19                   | 10            | 10            | 10            | 9             | 10            | 11            |
| Males 20 - 24                   | 23            | 15            | 9             | 15            | 15            | 6             |
| Males 25 - 29                   | 23            | 27            | 21            | 36            | 32            | 18            |
| Males 30 - 34                   | 65            | 40            | 44            | 46            | 52            | 61            |
| Males 35 - 39                   | 127           | 132           | 111           | 109           | 92            | 92            |
| Males 40 - 44                   | 276           | 229           | 251           | 216           | 245           | 182           |
| Males 45 - 49                   | 408           | 472           | 397           | 406           | 363           | 380           |
| Males 50 - 54                   | 743           | 672           | 699           | 707           | 593           | 615           |
| Males 55 - 59                   | 1,156         | 1,112         | 979           | 1,010         | 967           | 967           |
| Males 60 - 64                   | 1,665         | 1,647         | 1,612         | 1,619         | 1,572         | 1,507         |
| Males 65 - 69                   | 2,094         | 2,187         | 2,059         | 1,946         | 1,975         | 2,058         |
| Males 70 - 74                   | 2,879         | 2,763         | 2,651         | 2,550         | 2,675         | 2,554         |
| Males 75 - 79                   | 3,378         | 3,116         | 3,123         | 3,201         | 3,050         | 3,123         |
| Males 80 - 84                   | 3,311         | 3,233         | 3,152         | 3,285         | 3,324         | 3,203         |
| Males 85 - 89                   | 2,352         | 2,382         | 2,513         | 2,399         | 2,600         | 2,707         |
| Males 90 - 94                   | 1,044         | 992           | 888           | 1,095         | 1,160         | 1,298         |
| Males 95 - 99                   | 241           | 256           | 293           | 282           | 292           | 288           |
| Males 100+                      | 21            | 37            | 29            | 31            | 28            | 34            |
| <b>Palliative Care Deaths</b>   | <b>41,310</b> | <b>40,837</b> | <b>39,566</b> | <b>39,631</b> | <b>39,730</b> | <b>40,914</b> |
| <b>Percentage of All Deaths</b> | <b>73.79%</b> | <b>73.32%</b> | <b>73.47%</b> | <b>73.44%</b> | <b>74.04%</b> | <b>74.47%</b> |

|    | 2013   | 2014   | 2015   | 2016   | 2017   | 2018   | 2019   | 2020   | 2021   |
|----|--------|--------|--------|--------|--------|--------|--------|--------|--------|
| 1  |        |        |        |        |        |        |        |        |        |
| 2  |        |        |        |        |        |        |        |        |        |
| 3  |        |        |        |        |        |        |        |        |        |
| 4  |        |        |        |        |        |        |        |        |        |
| 5  | 6      | 2      | 2      | 2      | 7      | 8      | 8      | 7      | 7      |
| 6  | 1      | 2      | 1      | 2      | 3      | 2      | 2      | 2      | 2      |
| 7  | 5      | 5      | 2      | 4      | 6      | 4      | 4      | 4      | 4      |
| 8  | 11     | 8      | 5      | 7      | 7      | 6      | 5      | 5      | 5      |
| 9  | 8      | 8      | 9      | 10     | 10     | 10     | 10     | 9      | 9      |
| 10 | 19     | 14     | 26     | 20     | 14     | 18     | 18     | 18     | 17     |
| 11 | 48     | 37     | 45     | 42     | 39     | 44     | 45     | 46     | 46     |
| 12 | 84     | 59     | 79     | 80     | 73     | 59     | 59     | 59     | 59     |
| 13 | 150    | 169    | 134    | 163    | 131    | 109    | 108    | 108    | 109    |
| 14 | 287    | 286    | 312    | 268    | 249    | 250    | 237    | 228    | 216    |
| 15 | 502    | 462    | 482    | 478    | 513    | 494    | 482    | 467    | 457    |
| 16 | 688    | 719    | 701    | 702    | 720    | 712    | 712    | 714    | 708    |
| 17 | 1,037  | 959    | 932    | 986    | 1,021  | 979    | 986    | 991    | 998    |
| 18 | 1,546  | 1,504  | 1,576  | 1,538  | 1,513  | 1,459  | 1,425  | 1,406  | 1,399  |
| 19 | 2,085  | 1,945  | 2,100  | 2,070  | 2,119  | 2,244  | 2,277  | 2,317  | 2,341  |
| 20 | 2,878  | 2,810  | 2,871  | 2,843  | 2,930  | 2,824  | 2,832  | 2,827  | 2,866  |
| 21 | 3,721  | 3,648  | 3,771  | 3,612  | 3,736  | 3,749  | 3,749  | 3,741  | 3,693  |
| 22 | 4,020  | 3,945  | 4,184  | 4,123  | 4,316  | 4,214  | 4,235  | 4,253  | 4,266  |
| 23 | 3,023  | 3,030  | 3,387  | 3,037  | 3,311  | 3,104  | 3,133  | 3,174  | 3,217  |
| 24 | 1,066  | 1,025  | 1,210  | 1,213  | 1,316  | 1,234  | 1,262  | 1,250  | 1,260  |
| 25 | 226    | 239    | 241    | 228    | 205    | 182    | 173    | 201    | 213    |
| 26 |        |        |        |        |        |        |        |        |        |
| 27 | 6      | 5      | 3      | 3      | 4      | 4      | 4      | 4      | 4      |
| 28 | 3      | 6      | 4      | 7      | 3      | 4      | 4      | 4      | 4      |
| 29 | 8      | 4      | 7      | 3      | 5      | 4      | 4      | 4      | 4      |
| 30 | 7      | 6      | 9      | 7      | 10     | 9      | 9      | 8      | 8      |
| 31 | 8      | 10     | 10     | 12     | 7      | 7      | 7      | 6      | 6      |
| 32 | 22     | 17     | 28     | 36     | 20     | 17     | 17     | 16     | 15     |
| 33 | 52     | 36     | 59     | 44     | 54     | 45     | 46     | 46     | 46     |
| 34 | 77     | 91     | 82     | 67     | 98     | 90     | 90     | 90     | 90     |
| 35 | 217    | 203    | 188    | 191    | 163    | 146    | 145    | 147    | 149    |
| 36 | 386    | 367    | 371    | 389    | 390    | 317    | 304    | 291    | 278    |
| 37 | 648    | 603    | 639    | 655    | 602    | 544    | 528    | 506    | 492    |
| 38 | 984    | 947    | 953    | 1,022  | 945    | 951    | 944    | 939    | 922    |
| 39 | 1,392  | 1,379  | 1,435  | 1,398  | 1,413  | 1,367  | 1,364  | 1,369  | 1,368  |
| 40 | 2,101  | 2,131  | 2,252  | 2,237  | 2,085  | 2,007  | 1,948  | 1,907  | 1,891  |
| 41 | 2,582  | 2,526  | 2,679  | 2,582  | 2,726  | 2,896  | 2,931  | 2,981  | 2,994  |
| 42 | 3,120  | 3,095  | 3,187  | 3,005  | 3,256  | 3,074  | 3,109  | 3,123  | 3,203  |
| 43 | 3,412  | 3,306  | 3,482  | 3,499  | 3,594  | 3,487  | 3,519  | 3,526  | 3,496  |
| 44 | 2,688  | 2,803  | 2,898  | 2,841  | 3,054  | 3,011  | 3,068  | 3,138  | 3,189  |
| 45 | 1,431  | 1,462  | 1,654  | 1,572  | 1,639  | 1,541  | 1,580  | 1,619  | 1,676  |
| 46 | 297    | 307    | 354    | 398    | 454    | 421    | 457    | 477    | 499    |
| 47 | 33     | 41     | 37     | 56     | 55     | 36     | 35     | 43     | 51     |
| 48 |        |        |        |        |        |        |        |        |        |
| 49 | 40,885 | 40,221 | 42,401 | 41,452 | 42,816 | 41,678 | 41,873 | 42,072 | 42,275 |
| 50 | 74.74% | 74.16% | 73.65% | 73.08% | 73.99% | 74.22% | 74.26% | 74.28% | 74.32% |
| 51 |        |        |        |        |        |        |        |        |        |
| 52 |        |        |        |        |        |        |        |        |        |
| 53 |        |        |        |        |        |        |        |        |        |
| 54 |        |        |        |        |        |        |        |        |        |
| 55 |        |        |        |        |        |        |        |        |        |
| 56 |        |        |        |        |        |        |        |        |        |
| 57 |        |        |        |        |        |        |        |        |        |
| 58 |        |        |        |        |        |        |        |        |        |
| 59 |        |        |        |        |        |        |        |        |        |
| 60 |        |        |        |        |        |        |        |        |        |



1  
2  
3  
4  
5  
6  
7  
8  
9  
10  
11  
12  
13  
14  
15  
16  
17  
18  
19  
20  
21  
22  
23  
24  
25  
26  
27  
28  
29  
30  
31  
32  
33  
34  
35  
36  
37  
38  
39  
40  
41  
42  
43  
44  
45  
46  
47  
48  
49  
50  
51  
52  
53  
54  
55  
56  
57  
58  
59  
60

|        |        |        |        |        |        |        | Projected |        |  |
|--------|--------|--------|--------|--------|--------|--------|-----------|--------|--|
| 2022   | 2023   | 2024   | 2025   | 2026   | 2027   | 2028   | 2029      | 2030   |  |
| 7      | 7      | 7      | 7      | 6      | 6      | 6      | 6         | 6      |  |
| 2      | 2      | 2      | 2      | 2      | 2      | 2      | 2         | 2      |  |
| 4      | 4      | 4      | 3      | 3      | 3      | 3      | 3         | 3      |  |
| 5      | 5      | 5      | 5      | 5      | 5      | 5      | 5         | 5      |  |
| 8      | 8      | 8      | 8      | 8      | 8      | 8      | 8         | 8      |  |
| 16     | 16     | 16     | 15     | 15     | 14     | 14     | 13        | 13     |  |
| 47     | 47     | 47     | 47     | 46     | 44     | 44     | 42        | 41     |  |
| 59     | 59     | 60     | 60     | 60     | 61     | 61     | 60        | 60     |  |
| 112    | 114    | 115    | 115    | 114    | 113    | 113    | 114       | 113    |  |
| 203    | 196    | 194    | 193    | 195    | 199    | 203    | 203       | 203    |  |
| 444    | 426    | 402    | 386    | 365    | 344    | 331    | 327       | 326    |  |
| 698    | 684    | 668    | 647    | 633    | 614    | 588    | 558       | 533    |  |
| 1,003  | 1,008  | 1,011  | 1,015  | 1,007  | 996    | 979    | 957       | 928    |  |
| 1,406  | 1,414  | 1,426  | 1,446  | 1,463  | 1,475  | 1,486  | 1,492     | 1,502  |  |
| 2,207  | 2,138  | 2,096  | 2,076  | 2,074  | 2,091  | 2,109  | 2,133     | 2,157  |  |
| 3,029  | 3,105  | 3,160  | 3,223  | 3,266  | 3,090  | 3,002  | 2,953     | 2,935  |  |
| 3,674  | 3,689  | 3,711  | 3,717  | 3,776  | 4,009  | 4,126  | 4,212     | 4,308  |  |
| 4,272  | 4,316  | 4,340  | 4,351  | 4,316  | 4,315  | 4,363  | 4,415     | 4,444  |  |
| 3,282  | 3,315  | 3,351  | 3,389  | 3,435  | 3,476  | 3,541  | 3,591     | 3,631  |  |
| 1,262  | 1,267  | 1,286  | 1,312  | 1,344  | 1,384  | 1,407  | 1,439     | 1,476  |  |
| 221    | 221    | 224    | 226    | 232    | 234    | 236    | 244       | 253    |  |
| 3      | 3      | 3      | 3      | 3      | 3      | 3      | 3         | 3      |  |
| 4      | 4      | 4      | 4      | 4      | 4      | 4      | 4         | 4      |  |
| 4      | 4      | 4      | 3      | 3      | 3      | 3      | 3         | 3      |  |
| 8      | 8      | 7      | 7      | 7      | 7      | 7      | 7         | 7      |  |
| 5      | 5      | 5      | 5      | 5      | 5      | 5      | 5         | 4      |  |
| 15     | 14     | 14     | 13     | 12     | 12     | 11     | 11        | 10     |  |
| 46     | 45     | 45     | 44     | 43     | 41     | 40     | 39        | 37     |  |
| 90     | 90     | 91     | 92     | 93     | 94     | 93     | 92        | 91     |  |
| 152    | 155    | 155    | 155    | 155    | 155    | 157    | 159       | 160    |  |
| 265    | 255    | 253    | 253    | 255    | 259    | 262    | 261       | 261    |  |
| 473    | 452    | 431    | 411    | 391    | 371    | 356    | 351       | 350    |  |
| 903    | 880    | 855    | 821    | 797    | 767    | 734    | 700       | 670    |  |
| 1,369  | 1,369  | 1,364  | 1,360  | 1,341  | 1,316  | 1,287  | 1,255     | 1,210  |  |
| 1,894  | 1,894  | 1,899  | 1,922  | 1,941  | 1,949  | 1,956  | 1,956     | 1,958  |  |
| 2,815  | 2,715  | 2,650  | 2,611  | 2,606  | 2,623  | 2,636  | 2,656     | 2,686  |  |
| 3,427  | 3,545  | 3,605  | 3,684  | 3,715  | 3,516  | 3,410  | 3,350     | 3,318  |  |
| 3,510  | 3,533  | 3,598  | 3,636  | 3,751  | 4,043  | 4,209  | 4,308     | 4,427  |  |
| 3,224  | 3,300  | 3,361  | 3,398  | 3,394  | 3,433  | 3,497  | 3,602     | 3,671  |  |
| 1,753  | 1,819  | 1,876  | 1,944  | 2,006  | 2,057  | 2,135  | 2,203     | 2,255  |  |
| 512    | 524    | 548    | 572    | 606    | 645    | 678    | 712       | 752    |  |
| 55     | 58     | 62     | 67     | 71     | 74     | 77     | 83        | 90     |  |
| 42,489 | 42,711 | 42,961 | 43,247 | 43,565 | 43,860 | 44,184 | 44,536    | 44,912 |  |
| 74.34% | 74.36% | 74.38% | 74.41% | 74.43% | 74.44% | 74.44% | 74.45%    | 74.47% |  |

|    | 2031   | 2032   | 2033   | 2034   | 2035   | 2036   | 2037   | 2038   | 2039   |
|----|--------|--------|--------|--------|--------|--------|--------|--------|--------|
| 1  |        |        |        |        |        |        |        |        |        |
| 2  |        |        |        |        |        |        |        |        |        |
| 3  |        |        |        |        |        |        |        |        |        |
| 4  |        |        |        |        |        |        |        |        |        |
| 5  | 6      | 6      | 6      | 6      | 5      | 5      | 5      | 5      | 5      |
| 6  | 2      | 2      | 2      | 2      | 2      | 2      | 2      | 2      | 2      |
| 7  | 3      | 3      | 3      | 3      | 3      | 3      | 3      | 3      | 3      |
| 8  | 3      | 3      | 3      | 3      | 3      | 3      | 3      | 3      | 3      |
| 9  | 5      | 4      | 4      | 4      | 4      | 4      | 4      | 4      | 4      |
| 10 | 8      | 8      | 7      | 7      | 7      | 7      | 6      | 6      | 6      |
| 11 | 13     | 13     | 13     | 14     | 13     | 13     | 13     | 13     | 13     |
| 12 | 39     | 37     | 36     | 35     | 35     | 34     | 34     | 35     | 35     |
| 13 | 58     | 56     | 55     | 53     | 51     | 49     | 47     | 45     | 44     |
| 14 | 114    | 116    | 114    | 113    | 111    | 108    | 104    | 101    | 98     |
| 15 | 201    | 200    | 200    | 201    | 200    | 201    | 203    | 201    | 199    |
| 16 | 328    | 336    | 342    | 342    | 341    | 339    | 335    | 337    | 338    |
| 17 | 504    | 476    | 459    | 452    | 451    | 454    | 465    | 472    | 473    |
| 18 | 909    | 883    | 847    | 806    | 772    | 729    | 689    | 664    | 656    |
| 19 | 1,495  | 1,481  | 1,458  | 1,427  | 1,387  | 1,360  | 1,325  | 1,273  | 1,214  |
| 20 | 2,181  | 2,202  | 2,223  | 2,238  | 2,257  | 2,249  | 2,233  | 2,203  | 2,161  |
| 21 | 2,940  | 2,976  | 3,013  | 3,059  | 3,101  | 3,145  | 3,184  | 3,222  | 3,251  |
| 22 | 4,375  | 4,159  | 4,060  | 4,012  | 4,005  | 4,032  | 4,099  | 4,167  | 4,247  |
| 23 | 4,532  | 4,854  | 5,029  | 5,159  | 5,284  | 5,371  | 5,145  | 5,059  | 5,033  |
| 24 | 3,628  | 3,660  | 3,744  | 3,829  | 3,884  | 3,985  | 4,344  | 4,546  | 4,687  |
| 25 | 1,521  | 1,566  | 1,616  | 1,660  | 1,701  | 1,719  | 1,760  | 1,833  | 1,904  |
| 26 | 265    | 277    | 285    | 300    | 315    | 334    | 352    | 371    | 390    |
| 27 |        |        |        |        |        |        |        |        |        |
| 28 |        |        |        |        |        |        |        |        |        |
| 29 |        |        |        |        |        |        |        |        |        |
| 30 |        |        |        |        |        |        |        |        |        |
| 31 |        |        |        |        |        |        |        |        |        |
| 32 | 3      | 3      | 3      | 3      | 3      | 3      | 3      | 3      | 3      |
| 33 | 4      | 3      | 3      | 3      | 3      | 3      | 3      | 2      | 2      |
| 34 | 3      | 3      | 3      | 3      | 3      | 3      | 3      | 3      | 3      |
| 35 | 6      | 6      | 6      | 6      | 6      | 6      | 6      | 6      | 5      |
| 36 | 5      | 4      | 4      | 4      | 4      | 4      | 4      | 4      | 4      |
| 37 | 10     | 10     | 10     | 10     | 10     | 10     | 10     | 10     | 10     |
| 38 | 36     | 34     | 33     | 32     | 31     | 31     | 31     | 31     | 31     |
| 39 | 89     | 86     | 84     | 81     | 79     | 76     | 72     | 69     | 68     |
| 40 | 162    | 163    | 162    | 160    | 158    | 154    | 150    | 146    | 141    |
| 41 | 259    | 259    | 261    | 264    | 264    | 267    | 269    | 267    | 264    |
| 42 | 351    | 356    | 360    | 359    | 358    | 356    | 354    | 357    | 360    |
| 43 | 637    | 604    | 580    | 573    | 573    | 574    | 583    | 592    | 591    |
| 44 | 1,177  | 1,137  | 1,093  | 1,044  | 1,001  | 955    | 910    | 874    | 866    |
| 45 | 1,938  | 1,912  | 1,876  | 1,836  | 1,773  | 1,734  | 1,678  | 1,617  | 1,550  |
| 46 | 2,708  | 2,732  | 2,753  | 2,764  | 2,777  | 2,756  | 2,729  | 2,684  | 2,635  |
| 47 | 3,327  | 3,369  | 3,403  | 3,448  | 3,503  | 3,548  | 3,594  | 3,639  | 3,665  |
| 48 | 4,490  | 4,278  | 4,180  | 4,132  | 4,121  | 4,159  | 4,237  | 4,307  | 4,385  |
| 49 | 3,811  | 4,162  | 4,374  | 4,510  | 4,644  | 4,715  | 4,541  | 4,479  | 4,470  |
| 50 | 2,275  | 2,329  | 2,409  | 2,519  | 2,594  | 2,719  | 3,026  | 3,215  | 3,341  |
| 51 | 790    | 827    | 876    | 920    | 957    | 976    | 1,018  | 1,077  | 1,151  |
| 52 | 99     | 108    | 116    | 125    | 136    | 145    | 158    | 174    | 186    |
| 53 |        |        |        |        |        |        |        |        |        |
| 54 |        |        |        |        |        |        |        |        |        |
| 55 |        |        |        |        |        |        |        |        |        |
| 56 |        |        |        |        |        |        |        |        |        |
| 57 |        |        |        |        |        |        |        |        |        |
| 58 | 45,306 | 45,697 | 46,105 | 46,517 | 46,927 | 47,337 | 47,730 | 48,117 | 48,491 |
| 59 | 74.48% | 74.47% | 74.46% | 74.44% | 74.44% | 74.44% | 74.40% | 74.37% | 74.34% |
| 60 |        |        |        |        |        |        |        |        |        |

|    |             |
|----|-------------|
| 1  |             |
| 2  |             |
| 3  |             |
| 4  | <b>2040</b> |
| 5  | 5           |
| 6  | 2           |
| 7  | 2           |
| 8  | 4           |
| 9  | 6           |
| 10 | 13          |
| 11 | 35          |
| 12 | 43          |
| 13 | 94          |
| 14 | 195         |
| 15 | 338         |
| 16 | 472         |
| 17 | 655         |
| 18 | 1,163       |
| 19 | 2,103       |
| 20 | 3,286       |
| 21 | 4,321       |
| 22 | 5,056       |
| 23 | 4,802       |
| 24 | 1,955       |
| 25 | 408         |
| 26 |             |
| 27 | 3           |
| 28 | 2           |
| 29 | 3           |
| 30 | 5           |
| 31 | 4           |
| 32 | 10          |
| 33 | 31          |
| 34 | 66          |
| 35 | 137         |
| 36 | 259         |
| 37 | 363         |
| 38 | 590         |
| 39 | 868         |
| 40 | 1,490       |
| 41 | 2,556       |
| 42 | 3,698       |
| 43 | 4,478       |
| 44 | 4,496       |
| 45 | 3,452       |
| 46 | 1,200       |
| 47 | 198         |
| 48 |             |
| 49 | 48,869      |
| 50 | 74.32%      |
| 51 |             |
| 52 |             |
| 53 |             |
| 54 |             |
| 55 |             |
| 56 |             |
| 57 |             |
| 58 |             |
| 59 |             |
| 60 |             |

For peer review only

1  
2  
3  
4  
5  
6  
7  
8  
9  
10  
11  
12  
13  
14  
15  
16  
17  
18  
19  
20  
21  
22  
23  
24  
25  
26  
27  
28  
29  
30  
31  
32  
33  
34  
35  
36  
37  
38  
39  
40  
41  
42  
43  
44  
45  
46  
47  
48  
49  
50  
51  
52  
53  
54  
55  
56  
57  
58  
59  
60

|                                 | Baseline      |               |               |               |               |               |
|---------------------------------|---------------|---------------|---------------|---------------|---------------|---------------|
| Group                           | 2007          | 2008          | 2009          | 2010          | 2011          | 2012          |
| Females 0 - 4                   | 5             | 3             | 4             | 2             | 7             | 6             |
| Females 5 - 9                   | 4             | 7             | 5             | 2             | 2             | 3             |
| Females 10 - 14                 | 6             | 8             | 4             | 4             | 5             | 1             |
| Females 15 - 19                 | 8             | 11            | 9             | 9             | 11            | 4             |
| Females 20 - 24                 | 15            | 12            | 10            | 11            | 12            | 9             |
| Females 25 - 29                 | 23            | 14            | 21            | 14            | 24            | 27            |
| Females 30 - 34                 | 49            | 39            | 45            | 40            | 39            | 39            |
| Females 35 - 39                 | 103           | 103           | 90            | 85            | 96            | 66            |
| Females 40 - 44                 | 192           | 186           | 200           | 192           | 160           | 180           |
| Females 45 - 49                 | 360           | 311           | 314           | 297           | 330           | 291           |
| Females 50 - 54                 | 490           | 460           | 498           | 482           | 510           | 500           |
| Females 55 - 59                 | 706           | 741           | 690           | 671           | 665           | 691           |
| Females 60 - 64                 | 1,147         | 1,141         | 1,121         | 1,133         | 1,088         | 1,058         |
| Females 65 - 69                 | 1,592         | 1,509         | 1,455         | 1,478         | 1,431         | 1,529         |
| Females 70 - 74                 | 2,181         | 2,180         | 2,106         | 2,099         | 1,995         | 2,125         |
| Females 75 - 79                 | 3,014         | 3,181         | 2,906         | 2,845         | 2,834         | 2,952         |
| Females 80 - 84                 | 3,913         | 3,867         | 3,639         | 3,744         | 3,662         | 3,897         |
| Females 85 - 89                 | 3,872         | 4,061         | 4,007         | 3,790         | 3,837         | 4,074         |
| Females 90 - 94                 | 2,575         | 2,431         | 2,375         | 2,475         | 2,661         | 2,990         |
| Females 95 - 99                 | 1,040         | 1,066         | 998           | 1,080         | 1,093         | 1,127         |
| Females 100+                    | 179           | 170           | 218           | 202           | 209           | 224           |
| Males 0 - 4                     | 10            | 5             | 3             | 7             | 5             | 10            |
| Males 5 - 9                     | 1             | 4             | 5             | 6             | 4             | 3             |
| Males 10 - 14                   | 9             | 5             | 2             | 1             | 5             | 4             |
| Males 15 - 19                   | 10            | 10            | 10            | 9             | 10            | 11            |
| Males 20 - 24                   | 23            | 15            | 9             | 15            | 15            | 6             |
| Males 25 - 29                   | 23            | 27            | 21            | 36            | 32            | 18            |
| Males 30 - 34                   | 65            | 40            | 44            | 46            | 52            | 61            |
| Males 35 - 39                   | 127           | 132           | 111           | 109           | 92            | 92            |
| Males 40 - 44                   | 276           | 229           | 251           | 216           | 245           | 182           |
| Males 45 - 49                   | 408           | 472           | 397           | 406           | 363           | 380           |
| Males 50 - 54                   | 743           | 672           | 699           | 707           | 593           | 615           |
| Males 55 - 59                   | 1,156         | 1,112         | 979           | 1,010         | 967           | 967           |
| Males 60 - 64                   | 1,665         | 1,647         | 1,612         | 1,619         | 1,572         | 1,507         |
| Males 65 - 69                   | 2,094         | 2,187         | 2,059         | 1,946         | 1,975         | 2,058         |
| Males 70 - 74                   | 2,879         | 2,763         | 2,651         | 2,550         | 2,675         | 2,554         |
| Males 75 - 79                   | 3,378         | 3,116         | 3,123         | 3,201         | 3,050         | 3,123         |
| Males 80 - 84                   | 3,311         | 3,233         | 3,152         | 3,285         | 3,324         | 3,203         |
| Males 85 - 89                   | 2,352         | 2,382         | 2,513         | 2,399         | 2,600         | 2,707         |
| Males 90 - 94                   | 1,044         | 992           | 888           | 1,095         | 1,160         | 1,298         |
| Males 95 - 99                   | 241           | 256           | 293           | 282           | 292           | 288           |
| Males 100+                      | 21            | 37            | 29            | 31            | 28            | 34            |
| <b>Palliative Care Deaths</b>   | <b>41,310</b> | <b>40,837</b> | <b>39,566</b> | <b>39,631</b> | <b>39,730</b> | <b>40,914</b> |
| <b>Percentage of All Deaths</b> | <b>73.79%</b> | <b>73.32%</b> | <b>73.47%</b> | <b>73.44%</b> | <b>74.04%</b> | <b>74.47%</b> |

1  
2  
3  
4  
5  
6  
7  
8  
9  
10  
11  
12  
13  
14  
15  
16  
17  
18  
19  
20  
21  
22  
23  
24  
25  
26  
27  
28  
29  
30  
31  
32  
33  
34  
35  
36  
37  
38  
39  
40  
41  
42  
43  
44  
45  
46  
47  
48  
49  
50  
51  
52  
53  
54  
55  
56  
57  
58  
59  
60

| 2013   | 2014   | 2015   | 2016   | 2017   | 2018   | 2019   | 2020   | 2021   |
|--------|--------|--------|--------|--------|--------|--------|--------|--------|
| 6      | 2      | 2      | 2      | 7      | 8      | 8      | 9      | 9      |
| 1      | 2      | 1      | 2      | 3      | 1      | 1      | 1      | 1      |
| 5      | 5      | 2      | 4      | 6      | 4      | 4      | 4      | 4      |
| 11     | 8      | 5      | 7      | 7      | 6      | 6      | 6      | 6      |
| 8      | 8      | 9      | 10     | 10     | 9      | 9      | 9      | 8      |
| 19     | 14     | 26     | 20     | 14     | 17     | 16     | 15     | 13     |
| 48     | 37     | 45     | 42     | 39     | 43     | 43     | 42     | 42     |
| 84     | 59     | 79     | 80     | 73     | 56     | 53     | 51     | 48     |
| 150    | 169    | 134    | 163    | 131    | 106    | 101    | 97     | 95     |
| 287    | 286    | 312    | 268    | 249    | 244    | 227    | 214    | 198    |
| 502    | 462    | 482    | 478    | 513    | 492    | 480    | 464    | 453    |
| 688    | 719    | 701    | 702    | 720    | 710    | 709    | 710    | 703    |
| 1,037  | 959    | 932    | 986    | 1,021  | 977    | 980    | 983    | 986    |
| 1,546  | 1,504  | 1,576  | 1,538  | 1,513  | 1,459  | 1,424  | 1,405  | 1,398  |
| 2,085  | 1,945  | 2,100  | 2,070  | 2,119  | 2,247  | 2,284  | 2,327  | 2,354  |
| 2,878  | 2,810  | 2,871  | 2,843  | 2,930  | 2,827  | 2,839  | 2,837  | 2,879  |
| 3,721  | 3,648  | 3,771  | 3,612  | 3,736  | 3,755  | 3,761  | 3,758  | 3,716  |
| 4,020  | 3,945  | 4,184  | 4,123  | 4,316  | 4,230  | 4,268  | 4,302  | 4,331  |
| 3,023  | 3,030  | 3,387  | 3,037  | 3,311  | 3,127  | 3,179  | 3,244  | 3,313  |
| 1,066  | 1,025  | 1,210  | 1,213  | 1,316  | 1,240  | 1,274  | 1,268  | 1,284  |
| 226    | 239    | 241    | 228    | 205    | 183    | 175    | 204    | 218    |
| 6      | 5      | 3      | 3      | 4      | 4      | 3      | 3      | 3      |
| 3      | 6      | 4      | 7      | 3      | 5      | 5      | 5      | 6      |
| 8      | 4      | 7      | 3      | 5      | 4      | 4      | 4      | 4      |
| 7      | 6      | 9      | 7      | 10     | 10     | 10     | 10     | 10     |
| 8      | 10     | 10     | 12     | 7      | 7      | 6      | 5      | 5      |
| 22     | 17     | 28     | 36     | 20     | 17     | 17     | 16     | 15     |
| 52     | 36     | 59     | 44     | 54     | 45     | 44     | 44     | 43     |
| 77     | 91     | 82     | 67     | 98     | 89     | 87     | 85     | 83     |
| 217    | 203    | 188    | 191    | 163    | 140    | 134    | 129    | 125    |
| 386    | 367    | 371    | 389    | 390    | 312    | 295    | 279    | 262    |
| 648    | 603    | 639    | 655    | 602    | 533    | 507    | 476    | 453    |
| 984    | 947    | 953    | 1,022  | 945    | 943    | 928    | 915    | 891    |
| 1,392  | 1,379  | 1,435  | 1,398  | 1,413  | 1,365  | 1,362  | 1,365  | 1,363  |
| 2,101  | 2,131  | 2,252  | 2,237  | 2,085  | 2,001  | 1,937  | 1,890  | 1,869  |
| 2,582  | 2,526  | 2,679  | 2,582  | 2,726  | 2,892  | 2,922  | 2,968  | 2,976  |
| 3,120  | 3,095  | 3,187  | 3,005  | 3,256  | 3,071  | 3,103  | 3,114  | 3,190  |
| 3,412  | 3,306  | 3,482  | 3,499  | 3,594  | 3,491  | 3,527  | 3,539  | 3,513  |
| 2,688  | 2,803  | 2,898  | 2,841  | 3,054  | 3,013  | 3,072  | 3,145  | 3,197  |
| 1,431  | 1,462  | 1,654  | 1,572  | 1,639  | 1,543  | 1,584  | 1,625  | 1,684  |
| 297    | 307    | 354    | 398    | 454    | 425    | 464    | 489    | 516    |
| 33     | 41     | 37     | 56     | 55     | 36     | 35     | 43     | 50     |
| 40,885 | 40,221 | 42,401 | 41,452 | 42,816 | 41,683 | 41,887 | 42,098 | 42,315 |
| 74.74% | 74.16% | 73.65% | 73.08% | 73.99% | 74.23% | 74.28% | 74.33% | 74.39% |

1  
2  
3  
4  
5  
6  
7  
8  
9  
10  
11  
12  
13  
14  
15  
16  
17  
18  
19  
20  
21  
22  
23  
24  
25  
26  
27  
28  
29  
30  
31  
32  
33  
34  
35  
36  
37  
38  
39  
40  
41  
42  
43  
44  
45  
46  
47  
48  
49  
50  
51  
52  
53  
54  
55  
56  
57  
58  
59  
60

## Projected

| 2022   | 2023   | 2024   | 2025   | 2026   | 2027   | 2028   | 2029   | 2030   |
|--------|--------|--------|--------|--------|--------|--------|--------|--------|
| 9      | 9      | 10     | 10     | 10     | 10     | 10     | 10     | 10     |
| 1      | 1      | 1      | 1      | 1      | 1      | 1      | 1      | 1      |
| 3      | 3      | 3      | 3      | 3      | 2      | 2      | 2      | 2      |
| 6      | 6      | 6      | 6      | 7      | 6      | 7      | 6      | 7      |
| 7      | 7      | 6      | 6      | 6      | 5      | 5      | 5      | 5      |
| 12     | 11     | 10     | 9      | 8      | 6      | 6      | 5      | 4      |
| 41     | 40     | 39     | 38     | 36     | 34     | 32     | 30     | 28     |
| 45     | 42     | 40     | 37     | 34     | 32     | 28     | 25     | 22     |
| 94     | 92     | 89     | 85     | 81     | 77     | 73     | 70     | 66     |
| 182    | 172    | 166    | 161    | 158    | 158    | 157    | 152    | 148    |
| 439    | 420    | 396    | 379    | 357    | 336    | 322    | 318    | 316    |
| 692    | 677    | 660    | 638    | 623    | 604    | 577    | 547    | 521    |
| 988    | 990    | 989    | 991    | 980    | 966    | 946    | 923    | 892    |
| 1,404  | 1,411  | 1,424  | 1,442  | 1,460  | 1,470  | 1,481  | 1,487  | 1,496  |
| 2,223  | 2,156  | 2,116  | 2,100  | 2,100  | 2,120  | 2,141  | 2,170  | 2,196  |
| 3,046  | 3,127  | 3,185  | 3,252  | 3,299  | 3,125  | 3,039  | 2,993  | 2,978  |
| 3,702  | 3,723  | 3,751  | 3,763  | 3,828  | 4,070  | 4,196  | 4,290  | 4,394  |
| 4,354  | 4,416  | 4,457  | 4,486  | 4,466  | 4,482  | 4,548  | 4,619  | 4,667  |
| 3,403  | 3,462  | 3,524  | 3,590  | 3,664  | 3,734  | 3,829  | 3,910  | 3,980  |
| 1,292  | 1,303  | 1,329  | 1,361  | 1,401  | 1,450  | 1,481  | 1,521  | 1,567  |
| 228    | 229    | 234    | 237    | 245    | 248    | 252    | 263    | 274    |
| 2      | 2      | 2      | 2      | 1      | 1      | 1      | 1      | 0      |
| 6      | 6      | 7      | 7      | 7      | 8      | 8      | 9      | 9      |
| 3      | 3      | 3      | 3      | 3      | 3      | 3      | 3      | 3      |
| 10     | 10     | 10     | 11     | 11     | 11     | 11     | 12     | 12     |
| 4      | 3      | 3      | 3      | 2      | 2      | 2      | 2      | 1      |
| 15     | 14     | 13     | 13     | 12     | 11     | 11     | 10     | 10     |
| 43     | 42     | 40     | 39     | 37     | 35     | 34     | 32     | 30     |
| 82     | 80     | 79     | 78     | 78     | 77     | 74     | 72     | 69     |
| 121    | 117    | 111    | 105    | 98     | 92     | 87     | 81     | 75     |
| 247    | 234    | 228    | 225    | 223    | 222    | 222    | 217    | 213    |
| 426    | 398    | 371    | 345    | 321    | 298    | 278    | 267    | 260    |
| 865    | 835    | 805    | 766    | 737    | 703    | 666    | 629    | 596    |
| 1,363  | 1,362  | 1,355  | 1,351  | 1,330  | 1,304  | 1,274  | 1,242  | 1,195  |
| 1,867  | 1,860  | 1,860  | 1,877  | 1,890  | 1,892  | 1,893  | 1,887  | 1,884  |
| 2,794  | 2,691  | 2,623  | 2,581  | 2,571  | 2,584  | 2,594  | 2,609  | 2,635  |
| 3,409  | 3,522  | 3,579  | 3,652  | 3,680  | 3,478  | 3,370  | 3,307  | 3,273  |
| 3,532  | 3,559  | 3,629  | 3,672  | 3,793  | 4,093  | 4,267  | 4,373  | 4,499  |
| 3,235  | 3,314  | 3,378  | 3,417  | 3,415  | 3,458  | 3,524  | 3,632  | 3,705  |
| 1,763  | 1,833  | 1,892  | 1,963  | 2,028  | 2,082  | 2,164  | 2,235  | 2,291  |
| 533    | 550    | 579    | 610    | 651    | 698    | 740    | 783    | 833    |
| 54     | 57     | 61     | 65     | 69     | 72     | 75     | 80     | 86     |
| 42,547 | 42,790 | 43,065 | 43,378 | 43,727 | 44,063 | 44,432 | 44,831 | 45,256 |
| 74.44% | 74.50% | 74.56% | 74.63% | 74.71% | 74.78% | 74.86% | 74.94% | 75.04% |

1  
2  
3  
4  
5  
6  
7  
8  
9  
10  
11  
12  
13  
14  
15  
16  
17  
18  
19  
20  
21  
22  
23  
24  
25  
26  
27  
28  
29  
30  
31  
32  
33  
34  
35  
36  
37  
38  
39  
40  
41  
42  
43  
44  
45  
46  
47  
48  
49  
50  
51  
52  
53  
54  
55  
56  
57  
58  
59  
60

|  | 2031   | 2032   | 2033   | 2034   | 2035   | 2036   | 2037   | 2038   | 2039   |
|--|--------|--------|--------|--------|--------|--------|--------|--------|--------|
|  | 10     | 10     | 11     | 11     | 11     | 11     | 11     | 11     | 11     |
|  | 1      | 1      | 1      | 1      | 1      | 1      | 1      | 1      | 1      |
|  | 2      | 2      | 2      | 2      | 2      | 2      | 2      | 2      | 1      |
|  | 7      | 6      | 6      | 6      | 7      | 6      | 6      | 7      | 7      |
|  | 5      | 4      | 4      | 4      | 4      | 3      | 3      | 3      | 3      |
|  | 3      | 2      | 2      | 1      | 0      | 0      | 0      | 0      | 0      |
|  | 27     | 24     | 23     | 21     | 20     | 19     | 18     | 18     | 17     |
|  | 19     | 15     | 12     | 10     | 7      | 4      | 2      | 0      | 0      |
|  | 63     | 60     | 55     | 51     | 47     | 42     | 37     | 33     | 29     |
|  | 143    | 138    | 134    | 131    | 126    | 122    | 119    | 114    | 109    |
|  | 317    | 324    | 329    | 328    | 326    | 324    | 319    | 320    | 320    |
|  | 493    | 464    | 447    | 439    | 437    | 439    | 449    | 455    | 455    |
|  | 871    | 843    | 806    | 765    | 730    | 688    | 648    | 623    | 613    |
|  | 1,489  | 1,475  | 1,452  | 1,420  | 1,380  | 1,353  | 1,317  | 1,266  | 1,206  |
|  | 2,224  | 2,248  | 2,273  | 2,292  | 2,315  | 2,310  | 2,296  | 2,268  | 2,228  |
|  | 2,987  | 3,026  | 3,067  | 3,118  | 3,164  | 3,213  | 3,257  | 3,299  | 3,332  |
|  | 4,469  | 4,255  | 4,160  | 4,117  | 4,116  | 4,150  | 4,225  | 4,301  | 4,391  |
|  | 4,777  | 5,135  | 5,340  | 5,497  | 5,651  | 5,765  | 5,543  | 5,470  | 5,461  |
|  | 4,004  | 4,066  | 4,187  | 4,311  | 4,401  | 4,545  | 4,988  | 5,253  | 5,451  |
|  | 1,622  | 1,677  | 1,738  | 1,793  | 1,846  | 1,873  | 1,926  | 2,015  | 2,102  |
|  | 289    | 304    | 314    | 332    | 351    | 375    | 396    | 420    | 444    |
|  | 0      | 0      | 0      | 0      | 0      | 0      | 0      | 0      | 0      |
|  | 9      | 8      | 8      | 7      | 7      | 7      | 7      | 6      | 6      |
|  | 2      | 2      | 2      | 2      | 2      | 2      | 2      | 2      | 2      |
|  | 12     | 12     | 12     | 12     | 12     | 12     | 12     | 13     | 12     |
|  | 1      | 1      | 0      | 0      | 0      | 0      | 0      | 0      | 0      |
|  | 10     | 10     | 10     | 10     | 10     | 10     | 10     | 10     | 9      |
|  | 29     | 27     | 25     | 24     | 23     | 22     | 22     | 22     | 21     |
|  | 66     | 62     | 59     | 56     | 53     | 49     | 45     | 42     | 40     |
|  | 70     | 64     | 57     | 50     | 43     | 35     | 28     | 21     | 15     |
|  | 208    | 204    | 202    | 201    | 197    | 196    | 193    | 188    | 182    |
|  | 253    | 250    | 246    | 238    | 230    | 222    | 213    | 208    | 203    |
|  | 562    | 528    | 502    | 491    | 486    | 482    | 485    | 487    | 481    |
|  | 1,163  | 1,121  | 1,077  | 1,028  | 984    | 939    | 893    | 858    | 848    |
|  | 1,859  | 1,828  | 1,788  | 1,745  | 1,680  | 1,638  | 1,580  | 1,518  | 1,450  |
|  | 2,653  | 2,671  | 2,689  | 2,695  | 2,704  | 2,680  | 2,649  | 2,602  | 2,550  |
|  | 3,278  | 3,316  | 3,346  | 3,386  | 3,436  | 3,477  | 3,518  | 3,558  | 3,580  |
|  | 4,568  | 4,358  | 4,263  | 4,220  | 4,213  | 4,257  | 4,342  | 4,419  | 4,506  |
|  | 3,849  | 4,206  | 4,424  | 4,564  | 4,703  | 4,778  | 4,605  | 4,545  | 4,539  |
|  | 2,313  | 2,371  | 2,456  | 2,571  | 2,651  | 2,782  | 3,099  | 3,297  | 3,431  |
|  | 882    | 930    | 992    | 1,050  | 1,100  | 1,129  | 1,186  | 1,265  | 1,360  |
|  | 95     | 103    | 111    | 119    | 129    | 137    | 149    | 163    | 174    |
|  | 45,702 | 46,153 | 46,632 | 47,119 | 47,605 | 48,099 | 48,604 | 49,101 | 49,591 |
|  | 75.13% | 75.21% | 75.31% | 75.40% | 75.51% | 75.63% | 75.76% | 75.89% | 76.03% |

|    |             |
|----|-------------|
| 1  |             |
| 2  |             |
| 3  |             |
| 4  | <b>2040</b> |
| 5  | 12          |
| 6  | 1           |
| 7  | 1           |
| 8  | 7           |
| 9  | 2           |
| 10 | 0           |
| 11 | 16          |
| 12 | 0           |
| 13 | 25          |
| 14 | 103         |
| 15 | 319         |
| 16 | 454         |
| 17 | 610         |
| 18 | 1,156       |
| 19 | 2,171       |
| 20 | 3,372       |
| 21 | 4,474       |
| 22 | 5,505       |
| 23 | 5,619       |
| 24 | 2,168       |
| 25 | 467         |
| 26 | 0           |
| 27 | 6           |
| 28 | 2           |
| 29 | 12          |
| 30 | 0           |
| 31 | 9           |
| 32 | 21          |
| 33 | 38          |
| 34 | 9           |
| 35 | 175         |
| 36 | 197         |
| 37 | 475         |
| 38 | 850         |
| 39 | 1,390       |
| 40 | 2,470       |
| 41 | 3,609       |
| 42 | 4,606       |
| 43 | 4,569       |
| 44 | 3,549       |
| 45 | 1,429       |
| 46 | 185         |
| 47 |             |
| 48 |             |
| 49 | 50,084      |
| 50 | 76.17%      |
| 51 |             |
| 52 |             |
| 53 |             |
| 54 |             |
| 55 |             |
| 56 |             |
| 57 |             |
| 58 |             |
| 59 |             |
| 60 |             |

For peer review only



1  
2  
3  
4  
5  
6  
7  
8  
9  
10  
11  
12  
13  
14  
15  
16  
17  
18  
19  
20  
21  
22  
23  
24  
25  
26  
27  
28  
29  
30  
31  
32  
33  
34  
35  
36  
37  
38  
39  
40  
41  
42  
43  
44  
45  
46  
47  
48  
49  
50  
51  
52  
53  
54  
55  
56  
57  
58  
59  
60

| Group                           | Baseline      |               |               |               |               |               |
|---------------------------------|---------------|---------------|---------------|---------------|---------------|---------------|
|                                 | 2007          | 2008          | 2009          | 2010          | 2011          | 2012          |
| Females 0 - 4                   | 17            | 10            | 13            | 10            | 11            | 14            |
| Females 5 - 9                   | 6             | 7             | 5             | 4             | 6             | 5             |
| Females 10 - 14                 | 7             | 9             | 7             | 7             | 8             | 2             |
| Females 15 - 19                 | 12            | 16            | 11            | 16            | 15            | 5             |
| Females 20 - 24                 | 20            | 18            | 17            | 16            | 18            | 13            |
| Females 25 - 29                 | 28            | 19            | 29            | 23            | 37            | 33            |
| Females 30 - 34                 | 54            | 52            | 53            | 58            | 46            | 53            |
| Females 35 - 39                 | 125           | 125           | 106           | 102           | 109           | 80            |
| Females 40 - 44                 | 216           | 212           | 230           | 217           | 182           | 216           |
| Females 45 - 49                 | 412           | 353           | 352           | 339           | 369           | 327           |
| Females 50 - 54                 | 550           | 539           | 565           | 542           | 574           | 562           |
| Females 55 - 59                 | 800           | 831           | 769           | 759           | 754           | 769           |
| Females 60 - 64                 | 1,288         | 1,278         | 1,284         | 1,297         | 1,244         | 1,180         |
| Females 65 - 69                 | 1,820         | 1,713         | 1,659         | 1,691         | 1,629         | 1,705         |
| Females 70 - 74                 | 2,537         | 2,510         | 2,433         | 2,427         | 2,334         | 2,413         |
| Females 75 - 79                 | 3,590         | 3,790         | 3,466         | 3,434         | 3,349         | 3,474         |
| Females 80 - 84                 | 4,811         | 4,735         | 4,494         | 4,543         | 4,345         | 4,685         |
| Females 85 - 89                 | 4,857         | 5,084         | 5,039         | 4,785         | 4,769         | 4,993         |
| Females 90 - 94                 | 3,307         | 3,175         | 3,067         | 3,260         | 3,396         | 3,788         |
| Females 95 - 99                 | 1,377         | 1,395         | 1,326         | 1,429         | 1,409         | 1,475         |
| Females 100+                    | 247           | 237           | 279           | 274           | 265           | 300           |
| Males 0 - 4                     | 19            | 16            | 8             | 13            | 12            | 14            |
| Males 5 - 9                     | 4             | 7             | 7             | 9             | 9             | 5             |
| Males 10 - 14                   | 10            | 6             | 3             | 2             | 9             | 5             |
| Males 15 - 19                   | 17            | 21            | 15            | 15            | 18            | 16            |
| Males 20 - 24                   | 35            | 27            | 20            | 25            | 23            | 12            |
| Males 25 - 29                   | 35            | 37            | 32            | 43            | 44            | 26            |
| Males 30 - 34                   | 82            | 58            | 57            | 61            | 66            | 76            |
| Males 35 - 39                   | 159           | 159           | 133           | 134           | 113           | 127           |
| Males 40 - 44                   | 324           | 267           | 307           | 275           | 296           | 218           |
| Males 45 - 49                   | 464           | 535           | 471           | 463           | 429           | 444           |
| Males 50 - 54                   | 834           | 784           | 786           | 810           | 681           | 704           |
| Males 55 - 59                   | 1,277         | 1,245         | 1,115         | 1,170         | 1,094         | 1,081         |
| Males 60 - 64                   | 1,893         | 1,849         | 1,820         | 1,840         | 1,775         | 1,699         |
| Males 65 - 69                   | 2,355         | 2,466         | 2,354         | 2,231         | 2,280         | 2,319         |
| Males 70 - 74                   | 3,299         | 3,184         | 3,045         | 3,010         | 3,091         | 2,963         |
| Males 75 - 79                   | 3,977         | 3,763         | 3,671         | 3,741         | 3,565         | 3,670         |
| Males 80 - 84                   | 3,996         | 3,923         | 3,874         | 3,992         | 3,979         | 3,896         |
| Males 85 - 89                   | 2,918         | 2,973         | 3,168         | 3,029         | 3,235         | 3,335         |
| Males 90 - 94                   | 1,337         | 1,263         | 1,177         | 1,433         | 1,467         | 1,665         |
| Males 95 - 99                   | 330           | 342           | 395           | 396           | 394           | 395           |
| Males 100+                      | 30            | 49            | 46            | 59            | 45            | 53            |
| <b>Palliative Care Deaths</b>   | <b>49,476</b> | <b>49,082</b> | <b>47,708</b> | <b>47,984</b> | <b>47,494</b> | <b>48,815</b> |
| <b>Percentage of All Deaths</b> | <b>88.38%</b> | <b>88.12%</b> | <b>88.59%</b> | <b>88.91%</b> | <b>88.51%</b> | <b>88.86%</b> |

|    | 2013   | 2014   | 2015   | 2016   | 2017   | 2018   | 2019   | 2020   | 2021   |
|----|--------|--------|--------|--------|--------|--------|--------|--------|--------|
| 1  |        |        |        |        |        |        |        |        |        |
| 2  |        |        |        |        |        |        |        |        |        |
| 3  |        |        |        |        |        |        |        |        |        |
| 4  |        |        |        |        |        |        |        |        |        |
| 5  | 12     | 6      | 10     | 11     | 14     | 16     | 16     | 16     | 16     |
| 6  | 2      | 3      | 1      | 3      | 3      | 1      | 1      | 1      | 1      |
| 7  | 6      | 5      | 3      | 6      | 8      | 5      | 5      | 5      | 5      |
| 8  | 17     | 9      | 11     | 8      | 9      | 8      | 7      | 7      | 7      |
| 9  | 11     | 14     | 14     | 19     | 18     | 17     | 17     | 17     | 16     |
| 10 | 22     | 19     | 31     | 26     | 20     | 24     | 24     | 23     | 21     |
| 11 | 59     | 43     | 61     | 61     | 53     | 60     | 61     | 62     | 63     |
| 12 | 96     | 72     | 99     | 97     | 100    | 78     | 76     | 74     | 71     |
| 13 | 172    | 197    | 157    | 202    | 163    | 133    | 129    | 126    | 125    |
| 14 | 332    | 329    | 357    | 333    | 301    | 297    | 279    | 264    | 246    |
| 15 | 562    | 537    | 561    | 563    | 585    | 562    | 549    | 532    | 520    |
| 16 | 788    | 816    | 795    | 816    | 849    | 841    | 843    | 848    | 842    |
| 17 | 1,145  | 1,103  | 1,067  | 1,155  | 1,169  | 1,120  | 1,126  | 1,132  | 1,138  |
| 18 | 1,738  | 1,703  | 1,812  | 1,774  | 1,750  | 1,689  | 1,651  | 1,631  | 1,624  |
| 19 | 2,412  | 2,253  | 2,471  | 2,403  | 2,494  | 2,647  | 2,694  | 2,748  | 2,783  |
| 20 | 3,387  | 3,344  | 3,453  | 3,385  | 3,496  | 3,374  | 3,389  | 3,386  | 3,437  |
| 21 | 4,466  | 4,446  | 4,628  | 4,470  | 4,580  | 4,602  | 4,607  | 4,603  | 4,550  |
| 22 | 4,936  | 4,899  | 5,190  | 5,134  | 5,331  | 5,217  | 5,256  | 5,290  | 5,319  |
| 23 | 3,808  | 3,812  | 4,302  | 3,881  | 4,134  | 3,893  | 3,949  | 4,019  | 4,094  |
| 24 | 1,383  | 1,318  | 1,589  | 1,594  | 1,725  | 1,623  | 1,666  | 1,657  | 1,677  |
| 25 | 313    | 321    | 345    | 327    | 288    | 257    | 247    | 288    | 308    |
| 26 |        |        |        |        |        |        |        |        |        |
| 27 | 14     | 10     | 9      | 10     | 9      | 8      | 8      | 7      | 7      |
| 28 | 5      | 8      | 6      | 9      | 4      | 6      | 6      | 7      | 7      |
| 29 | 11     | 7      | 8      | 5      | 8      | 6      | 6      | 6      | 6      |
| 30 | 12     | 9      | 15     | 12     | 13     | 13     | 13     | 12     | 12     |
| 31 | 13     | 14     | 18     | 21     | 13     | 13     | 12     | 11     | 10     |
| 32 | 31     | 29     | 37     | 44     | 30     | 26     | 25     | 24     | 23     |
| 33 | 71     | 52     | 86     | 69     | 78     | 66     | 66     | 66     | 66     |
| 34 | 108    | 126    | 121    | 125    | 140    | 128    | 127    | 127    | 126    |
| 35 | 287    | 256    | 238    | 265    | 248    | 221    | 218    | 218    | 219    |
| 36 | 450    | 449    | 456    | 491    | 497    | 403    | 385    | 369    | 352    |
| 37 | 738    | 691    | 759    | 814    | 752    | 674    | 650    | 618    | 595    |
| 38 | 1,113  | 1,077  | 1,135  | 1,190  | 1,107  | 1,111  | 1,101  | 1,093  | 1,070  |
| 39 | 1,561  | 1,582  | 1,603  | 1,620  | 1,619  | 1,566  | 1,563  | 1,568  | 1,567  |
| 40 | 2,420  | 2,427  | 2,591  | 2,608  | 2,416  | 2,325  | 2,258  | 2,211  | 2,192  |
| 41 | 2,928  | 2,939  | 3,159  | 3,042  | 3,206  | 3,410  | 3,455  | 3,518  | 3,537  |
| 42 | 3,661  | 3,676  | 3,818  | 3,609  | 3,882  | 3,666  | 3,709  | 3,726  | 3,822  |
| 43 | 4,082  | 4,024  | 4,229  | 4,281  | 4,367  | 4,245  | 4,292  | 4,309  | 4,280  |
| 44 | 3,302  | 3,470  | 3,685  | 3,591  | 3,815  | 3,767  | 3,842  | 3,936  | 4,005  |
| 45 | 1,835  | 1,869  | 2,127  | 2,066  | 2,155  | 2,033  | 2,093  | 2,153  | 2,237  |
| 46 | 383    | 395    | 499    | 560    | 620    | 580    | 634    | 667    | 704    |
| 47 | 47     | 55     | 55     | 69     | 79     | 52     | 50     | 62     | 72     |
| 48 |        |        |        |        |        |        |        |        |        |
| 49 | 48,739 | 48,414 | 51,611 | 50,769 | 52,148 | 50,784 | 51,106 | 51,437 | 51,773 |
| 50 | 89.10% | 89.26% | 89.64% | 89.51% | 90.11% | 90.44% | 90.63% | 90.82% | 91.01% |
| 51 |        |        |        |        |        |        |        |        |        |
| 52 |        |        |        |        |        |        |        |        |        |
| 53 |        |        |        |        |        |        |        |        |        |
| 54 |        |        |        |        |        |        |        |        |        |
| 55 |        |        |        |        |        |        |        |        |        |
| 56 |        |        |        |        |        |        |        |        |        |
| 57 |        |        |        |        |        |        |        |        |        |
| 58 |        |        |        |        |        |        |        |        |        |
| 59 |        |        |        |        |        |        |        |        |        |
| 60 |        |        |        |        |        |        |        |        |        |

1  
2  
3  
4  
5  
6  
7  
8  
9  
10  
11  
12  
13  
14  
15  
16  
17  
18  
19  
20  
21  
22  
23  
24  
25  
26  
27  
28  
29  
30  
31  
32  
33  
34  
35  
36  
37  
38  
39  
40  
41  
42  
43  
44  
45  
46  
47  
48  
49  
50  
51  
52  
53  
54  
55  
56  
57  
58  
59  
60

|        |        |        |        |        |        |        | Projected |        |  |
|--------|--------|--------|--------|--------|--------|--------|-----------|--------|--|
| 2022   | 2023   | 2024   | 2025   | 2026   | 2027   | 2028   | 2029      | 2030   |  |
| 16     | 16     | 16     | 16     | 16     | 16     | 16     | 16        | 16     |  |
| 1      | 1      | 1      | 1      | 0      | 0      | 0      | 0         | 0      |  |
| 5      | 5      | 5      | 4      | 4      | 4      | 4      | 4         | 4      |  |
| 8      | 7      | 7      | 8      | 8      | 7      | 8      | 7         | 7      |  |
| 16     | 15     | 14     | 14     | 14     | 14     | 14     | 14        | 15     |  |
| 20     | 19     | 18     | 16     | 15     | 14     | 13     | 11        | 11     |  |
| 63     | 63     | 64     | 63     | 62     | 60     | 59     | 57        | 55     |  |
| 68     | 66     | 64     | 62     | 59     | 58     | 54     | 52        | 48     |  |
| 126    | 125    | 123    | 120    | 117    | 113    | 111    | 109       | 105    |  |
| 228    | 217    | 211    | 207    | 205    | 206    | 207    | 203       | 200    |  |
| 505    | 483    | 457    | 438    | 414    | 390    | 374    | 370       | 368    |  |
| 833    | 817    | 800    | 776    | 762    | 741    | 710    | 676       | 647    |  |
| 1,143  | 1,147  | 1,149  | 1,153  | 1,143  | 1,129  | 1,108  | 1,083     | 1,049  |  |
| 1,634  | 1,644  | 1,660  | 1,684  | 1,706  | 1,721  | 1,735  | 1,744     | 1,757  |  |
| 2,631  | 2,555  | 2,511  | 2,494  | 2,497  | 2,524  | 2,552  | 2,588     | 2,623  |  |
| 3,638  | 3,734  | 3,805  | 3,885  | 3,943  | 3,735  | 3,633  | 3,579     | 3,561  |  |
| 4,532  | 4,556  | 4,589  | 4,602  | 4,681  | 4,976  | 5,128  | 5,242     | 5,367  |  |
| 5,339  | 5,407  | 5,450  | 5,476  | 5,444  | 5,456  | 5,529  | 5,608     | 5,658  |  |
| 4,195  | 4,257  | 4,323  | 4,392  | 4,473  | 4,547  | 4,652  | 4,739     | 4,813  |  |
| 1,685  | 1,698  | 1,731  | 1,771  | 1,822  | 1,883  | 1,921  | 1,972     | 2,030  |  |
| 323    | 325    | 332    | 338    | 350    | 354    | 361    | 376       | 393    |  |
| 6      | 6      | 5      | 5      | 5      | 4      | 4      | 3         | 3      |  |
| 7      | 7      | 8      | 8      | 8      | 8      | 9      | 9         | 9      |  |
| 7      | 7      | 7      | 6      | 7      | 7      | 6      | 6         | 6      |  |
| 12     | 12     | 13     | 13     | 13     | 14     | 14     | 14        | 14     |  |
| 9      | 8      | 7      | 7      | 6      | 6      | 6      | 6         | 5      |  |
| 22     | 21     | 20     | 19     | 18     | 17     | 16     | 15        | 15     |  |
| 66     | 66     | 65     | 63     | 62     | 60     | 58     | 56        | 54     |  |
| 126    | 126    | 127    | 127    | 128    | 129    | 128    | 126       | 124    |  |
| 221    | 223    | 222    | 220    | 218    | 216    | 216    | 217       | 216    |  |
| 335    | 322    | 318    | 318    | 320    | 324    | 327    | 325       | 324    |  |
| 568    | 539    | 509    | 481    | 455    | 428    | 406    | 398       | 393    |  |
| 1,046  | 1,017  | 986    | 944    | 915    | 879    | 839    | 798       | 761    |  |
| 1,568  | 1,567  | 1,561  | 1,557  | 1,535  | 1,506  | 1,472  | 1,436     | 1,384  |  |
| 2,196  | 2,196  | 2,202  | 2,229  | 2,251  | 2,261  | 2,269  | 2,269     | 2,273  |  |
| 3,329  | 3,215  | 3,141  | 3,099  | 3,096  | 3,120  | 3,139  | 3,166     | 3,206  |  |
| 4,090  | 4,232  | 4,305  | 4,399  | 4,438  | 4,200  | 4,075  | 4,004     | 3,967  |  |
| 4,306  | 4,342  | 4,430  | 4,486  | 4,636  | 5,006  | 5,222  | 5,355     | 5,513  |  |
| 4,055  | 4,157  | 4,240  | 4,292  | 4,292  | 4,348  | 4,434  | 4,574     | 4,668  |  |
| 2,348  | 2,447  | 2,532  | 2,634  | 2,727  | 2,807  | 2,925  | 3,028     | 3,111  |  |
| 727    | 749    | 790    | 831    | 887    | 951    | 1,008  | 1,066     | 1,135  |  |
| 78     | 82     | 87     | 94     | 100    | 104    | 108    | 116       | 125    |  |
| 52,130 | 52,497 | 52,905 | 53,355 | 53,852 | 54,343 | 54,871 | 55,438    | 56,033 |  |
| 91.21% | 91.40% | 91.60% | 91.80% | 92.00% | 92.23% | 92.45% | 92.68%    | 92.91% |  |

|    | 2031   | 2032   | 2033   | 2034   | 2035   | 2036   | 2037   | 2038   | 2039   |
|----|--------|--------|--------|--------|--------|--------|--------|--------|--------|
| 1  |        |        |        |        |        |        |        |        |        |
| 2  |        |        |        |        |        |        |        |        |        |
| 3  |        |        |        |        |        |        |        |        |        |
| 4  | 16     | 16     | 16     | 16     | 17     | 16     | 16     | 16     | 16     |
| 5  | 0      | 0      | 0      | 0      | 0      | 0      | 0      | 0      | 0      |
| 6  | 3      | 4      | 3      | 3      | 3      | 3      | 3      | 3      | 3      |
| 7  | 8      | 7      | 7      | 7      | 7      | 7      | 7      | 7      | 7      |
| 8  | 15     | 15     | 14     | 14     | 14     | 14     | 13     | 13     | 13     |
| 9  | 10     | 10     | 9      | 9      | 8      | 8      | 7      | 7      | 6      |
| 10 | 54     | 50     | 49     | 47     | 47     | 47     | 47     | 48     | 48     |
| 11 | 44     | 41     | 37     | 34     | 31     | 27     | 24     | 21     | 19     |
| 12 | 103    | 102    | 98     | 94     | 90     | 85     | 79     | 75     | 70     |
| 13 | 195    | 190    | 187    | 185    | 180    | 178    | 176    | 170    | 165    |
| 14 | 370    | 379    | 385    | 385    | 383    | 381    | 376    | 378    | 378    |
| 15 | 614    | 580    | 561    | 554    | 553    | 558    | 573    | 583    | 585    |
| 16 | 1,026  | 995    | 954    | 907    | 867    | 819    | 773    | 745    | 734    |
| 17 | 1,750  | 1,736  | 1,711  | 1,676  | 1,630  | 1,599  | 1,559  | 1,500  | 1,431  |
| 18 | 2,659  | 2,691  | 2,723  | 2,749  | 2,779  | 2,776  | 2,763  | 2,732  | 2,687  |
| 19 | 3,573  | 3,620  | 3,670  | 3,731  | 3,787  | 3,846  | 3,899  | 3,950  | 3,991  |
| 20 | 5,457  | 5,194  | 5,077  | 5,023  | 5,021  | 5,061  | 5,150  | 5,242  | 5,349  |
| 21 | 5,783  | 6,208  | 6,447  | 6,628  | 6,804  | 6,933  | 6,656  | 6,560  | 6,540  |
| 22 | 4,831  | 4,896  | 5,030  | 5,167  | 5,264  | 5,425  | 5,940  | 6,243  | 6,465  |
| 23 | 2,099  | 2,168  | 2,245  | 2,315  | 2,380  | 2,415  | 2,481  | 2,593  | 2,703  |
| 24 | 414    | 436    | 451    | 478    | 507    | 541    | 573    | 608    | 643    |
| 25 |        |        |        |        |        |        |        |        |        |
| 26 | 3      | 2      | 2      | 2      | 2      | 1      | 1      | 1      | 1      |
| 27 | 9      | 8      | 8      | 7      | 7      | 6      | 7      | 6      | 6      |
| 28 | 6      | 6      | 6      | 6      | 6      | 6      | 6      | 6      | 6      |
| 29 | 14     | 14     | 14     | 13     | 14     | 14     | 14     | 14     | 14     |
| 30 | 5      | 5      | 5      | 4      | 4      | 4      | 3      | 3      | 3      |
| 31 | 14     | 15     | 14     | 14     | 14     | 14     | 14     | 14     | 14     |
| 32 | 52     | 49     | 47     | 46     | 45     | 44     | 45     | 45     | 45     |
| 33 | 120    | 116    | 113    | 109    | 105    | 100    | 95     | 91     | 89     |
| 34 | 217    | 217    | 213    | 209    | 204    | 196    | 189    | 182    | 174    |
| 35 | 322    | 321    | 323    | 326    | 326    | 329    | 330    | 327    | 323    |
| 36 | 391    | 393    | 395    | 390    | 385    | 380    | 374    | 374    | 374    |
| 37 | 723    | 684    | 655    | 646    | 643    | 643    | 652    | 661    | 657    |
| 38 | 1,347  | 1,300  | 1,249  | 1,194  | 1,144  | 1,092  | 1,040  | 999    | 989    |
| 39 | 2,250  | 2,219  | 2,177  | 2,131  | 2,059  | 2,014  | 1,949  | 1,878  | 1,800  |
| 40 | 3,236  | 3,267  | 3,297  | 3,313  | 3,333  | 3,312  | 3,283  | 3,232  | 3,177  |
| 41 | 3,978  | 4,029  | 4,072  | 4,125  | 4,192  | 4,247  | 4,303  | 4,357  | 4,390  |
| 42 | 5,601  | 5,347  | 5,234  | 5,184  | 5,179  | 5,237  | 5,345  | 5,443  | 5,553  |
| 43 | 4,853  | 5,306  | 5,585  | 5,767  | 5,946  | 6,044  | 5,829  | 5,757  | 5,753  |
| 44 | 3,149  | 3,235  | 3,359  | 3,525  | 3,643  | 3,832  | 4,280  | 4,563  | 4,759  |
| 45 | 1,201  | 1,266  | 1,350  | 1,428  | 1,497  | 1,536  | 1,613  | 1,719  | 1,849  |
| 46 | 137    | 150    | 160    | 172    | 187    | 199    | 216    | 238    | 253    |
| 47 |        |        |        |        |        |        |        |        |        |
| 48 | 56,653 | 57,288 | 57,956 | 58,636 | 59,309 | 59,989 | 60,705 | 61,405 | 62,084 |
| 49 | 93.13% | 93.36% | 93.59% | 93.83% | 94.08% | 94.33% | 94.63% | 94.91% | 95.18% |
| 50 |        |        |        |        |        |        |        |        |        |

|    |             |
|----|-------------|
| 1  |             |
| 2  |             |
| 3  |             |
| 4  | <b>2040</b> |
| 5  | 17          |
| 6  | 0           |
| 7  | 3           |
| 8  | 7           |
| 9  | 13          |
| 10 | 5           |
| 11 | 48          |
| 12 | 16          |
| 13 | 65          |
| 14 | 159         |
| 15 | 378         |
| 16 | 586         |
| 17 | 732         |
| 18 | 1,373       |
| 19 | 2,621       |
| 20 | 4,039       |
| 21 | 5,449       |
| 22 | 6,584       |
| 23 | 6,651       |
| 24 | 2,785       |
| 25 | 678         |
| 26 | 0           |
| 27 | 6           |
| 28 | 6           |
| 29 | 14          |
| 30 | 3           |
| 31 | 13          |
| 32 | 45          |
| 33 | 87          |
| 34 | 168         |
| 35 | 317         |
| 36 | 373         |
| 37 | 655         |
| 38 | 992         |
| 39 | 1,731       |
| 40 | 3,085       |
| 41 | 4,431       |
| 42 | 5,680       |
| 43 | 5,795       |
| 44 | 4,934       |
| 45 | 1,942       |
| 46 | 269         |
| 47 |             |
| 48 |             |
| 49 | 62,757      |
| 50 | 95.44%      |
| 51 |             |
| 52 |             |
| 53 |             |
| 54 |             |
| 55 |             |
| 56 |             |
| 57 |             |
| 58 |             |
| 59 |             |
| 60 |             |

For peer review only

1  
2  
3  
4  
5  
6  
7  
8  
9  
10  
11  
12  
13  
14  
15  
16  
17  
18  
19  
20  
21  
22  
23  
24  
25  
26  
27  
28  
29  
30  
31  
32  
33  
34  
35  
36  
37  
38  
39  
40  
41  
42  
43  
44  
45  
46  
47  
48  
49  
50  
51  
52  
53  
54  
55  
56  
57  
58  
59  
60

|                                 | Baseline      |               |               |               |               |               |
|---------------------------------|---------------|---------------|---------------|---------------|---------------|---------------|
| Group                           | 2007          | 2008          | 2009          | 2010          | 2011          | 2012          |
| Females 0 - 4                   | 3             | 1             | 3             | 1             | 6             | 3             |
| Females 5 - 9                   | 3             | 4             | 5             | 2             | 0             | 3             |
| Females 10 - 14                 | 3             | 5             | 4             | 1             | 4             | 0             |
| Females 15 - 19                 | 4             | 7             | 6             | 7             | 8             | 2             |
| Females 20 - 24                 | 8             | 8             | 4             | 8             | 6             | 6             |
| Females 25 - 29                 | 8             | 9             | 15            | 8             | 15            | 17            |
| Females 30 - 34                 | 32            | 16            | 25            | 17            | 22            | 21            |
| Females 35 - 39                 | 49            | 52            | 39            | 49            | 48            | 37            |
| Females 40 - 44                 | 105           | 104           | 113           | 116           | 90            | 105           |
| Females 45 - 49                 | 228           | 178           | 182           | 163           | 205           | 164           |
| Females 50 - 54                 | 273           | 266           | 295           | 293           | 293           | 326           |
| Females 55 - 59                 | 420           | 432           | 408           | 417           | 415           | 466           |
| Females 60 - 64                 | 685           | 640           | 683           | 674           | 685           | 664           |
| Females 65 - 69                 | 890           | 844           | 829           | 837           | 856           | 866           |
| Females 70 - 74                 | 1,048         | 1,077         | 1,057         | 1,077         | 1,020         | 1,079         |
| Females 75 - 79                 | 1,199         | 1,264         | 1,195         | 1,228         | 1,176         | 1,262         |
| Females 80 - 84                 | 1,157         | 1,203         | 1,170         | 1,210         | 1,179         | 1,303         |
| Females 85 - 89                 | 839           | 928           | 926           | 858           | 886           | 940           |
| Females 90 - 94                 | 406           | 381           | 368           | 426           | 417           | 488           |
| Females 95 - 99                 | 116           | 109           | 116           | 111           | 108           | 118           |
| Females 100+                    | 15            | 12            | 13            | 13            | 13            | 16            |
| Males 0 - 4                     | 9             | 1             | 2             | 6             | 3             | 7             |
| Males 5 - 9                     | 1             | 3             | 3             | 4             | 4             | 2             |
| Males 10 - 14                   | 7             | 5             | 2             | 0             | 3             | 1             |
| Males 15 - 19                   | 6             | 7             | 6             | 6             | 6             | 8             |
| Males 20 - 24                   | 11            | 12            | 4             | 8             | 9             | 2             |
| Males 25 - 29                   | 12            | 10            | 12            | 14            | 18            | 6             |
| Males 30 - 34                   | 15            | 10            | 13            | 19            | 18            | 20            |
| Males 35 - 39                   | 33            | 42            | 28            | 28            | 24            | 35            |
| Males 40 - 44                   | 66            | 69            | 76            | 52            | 80            | 64            |
| Males 45 - 49                   | 126           | 166           | 140           | 132           | 130           | 122           |
| Males 50 - 54                   | 284           | 267           | 277           | 286           | 236           | 258           |
| Males 55 - 59                   | 505           | 511           | 498           | 468           | 460           | 441           |
| Males 60 - 64                   | 821           | 808           | 788           | 825           | 776           | 781           |
| Males 65 - 69                   | 983           | 1,058         | 1,042         | 991           | 1,022         | 1,054         |
| Males 70 - 74                   | 1,333         | 1,312         | 1,299         | 1,244         | 1,352         | 1,313         |
| Males 75 - 79                   | 1,418         | 1,270         | 1,396         | 1,404         | 1,406         | 1,394         |
| Males 80 - 84                   | 1,186         | 1,165         | 1,138         | 1,262         | 1,284         | 1,237         |
| Males 85 - 89                   | 661           | 707           | 724           | 740           | 806           | 846           |
| Males 90 - 94                   | 253           | 250           | 222           | 276           | 299           | 338           |
| Males 95 - 99                   | 48            | 54            | 59            | 42            | 65            | 45            |
| Males 100+                      | 5             | 2             | 2             | 0             | 4             | 4             |
| <b>Cancer Deaths</b>            | <b>15,274</b> | <b>15,269</b> | <b>15,187</b> | <b>15,323</b> | <b>15,457</b> | <b>15,864</b> |
| <b>Percentage of All Deaths</b> | <b>27.28%</b> | <b>27.41%</b> | <b>28.20%</b> | <b>28.39%</b> | <b>28.80%</b> | <b>28.88%</b> |

1  
2  
3  
4  
5  
6  
7  
8  
9  
10  
11  
12  
13  
14  
15  
16  
17  
18  
19  
20  
21  
22  
23  
24  
25  
26  
27  
28  
29  
30  
31  
32  
33  
34  
35  
36  
37  
38  
39  
40  
41  
42  
43  
44  
45  
46  
47  
48  
49  
50  
51  
52  
53  
54  
55  
56  
57  
58  
59  
60

| 2013   | 2014   | 2015   | 2016   | 2017   | 2018   | 2019   | 2020   | 2021   |
|--------|--------|--------|--------|--------|--------|--------|--------|--------|
| 4      | 2      | 2      | 1      | 5      | 6      | 6      | 6      | 7      |
| 1      | 2      | 1      | 1      | 3      | 2      | 2      | 2      | 2      |
| 2      | 4      | 1      | 4      | 4      | 3      | 3      | 3      | 3      |
| 9      | 6      | 3      | 4      | 5      | 4      | 4      | 4      | 5      |
| 4      | 5      | 7      | 7      | 6      | 6      | 6      | 5      | 5      |
| 9      | 10     | 19     | 13     | 8      | 10     | 10     | 10     | 10     |
| 30     | 20     | 32     | 23     | 24     | 26     | 26     | 25     | 25     |
| 49     | 34     | 36     | 49     | 44     | 35     | 34     | 34     | 33     |
| 84     | 99     | 66     | 95     | 63     | 50     | 47     | 44     | 42     |
| 168    | 166    | 182    | 153    | 149    | 145    | 134    | 125    | 115    |
| 310    | 298    | 304    | 288    | 322    | 313    | 308    | 301    | 297    |
| 434    | 443    | 421    | 435    | 438    | 433    | 433    | 435    | 432    |
| 644    | 592    | 554    | 555    | 566    | 537    | 535    | 532    | 529    |
| 919    | 868    | 913    | 863    | 878    | 850    | 832    | 824    | 823    |
| 1,077  | 1,081  | 1,096  | 1,045  | 1,091  | 1,164  | 1,191  | 1,221  | 1,244  |
| 1,238  | 1,248  | 1,222  | 1,225  | 1,323  | 1,292  | 1,312  | 1,326  | 1,361  |
| 1,208  | 1,196  | 1,202  | 1,198  | 1,233  | 1,252  | 1,266  | 1,278  | 1,276  |
| 942    | 990    | 980    | 989    | 963    | 946    | 958    | 968    | 977    |
| 492    | 504    | 519    | 489    | 514    | 485    | 492    | 502    | 511    |
| 106    | 103    | 134    | 142    | 149    | 141    | 145    | 144    | 146    |
| 18     | 23     | 21     | 19     | 14     | 12     | 11     | 13     | 14     |
| 6      | 4      | 2      | 2      | 2      | 2      | 1      | 1      | 0      |
| 2      | 6      | 3      | 6      | 2      | 3      | 3      | 3      | 4      |
| 2      | 2      | 6      | 1      | 4      | 3      | 3      | 3      | 3      |
| 6      | 5      | 5      | 5      | 5      | 5      | 5      | 5      | 5      |
| 4      | 4      | 4      | 8      | 3      | 3      | 2      | 2      | 2      |
| 12     | 5      | 19     | 13     | 8      | 7      | 6      | 6      | 5      |
| 16     | 14     | 23     | 21     | 18     | 15     | 16     | 16     | 17     |
| 22     | 29     | 25     | 21     | 31     | 29     | 29     | 29     | 29     |
| 65     | 64     | 64     | 70     | 57     | 51     | 51     | 52     | 53     |
| 141    | 138    | 145    | 168    | 132    | 107    | 102    | 97     | 93     |
| 264    | 248    | 288    | 268    | 242    | 216    | 206    | 195    | 187    |
| 474    | 462    | 469    | 448    | 413    | 412    | 406    | 400    | 389    |
| 724    | 745    | 730    | 726    | 679    | 654    | 651    | 651    | 648    |
| 1,101  | 1,125  | 1,209  | 1,192  | 1,066  | 1,032  | 1,007  | 991    | 988    |
| 1,298  | 1,307  | 1,334  | 1,272  | 1,389  | 1,487  | 1,517  | 1,554  | 1,573  |
| 1,368  | 1,411  | 1,425  | 1,351  | 1,436  | 1,361  | 1,382  | 1,393  | 1,434  |
| 1,327  | 1,256  | 1,273  | 1,352  | 1,427  | 1,399  | 1,428  | 1,446  | 1,449  |
| 874    | 922    | 845    | 898    | 957    | 954    | 982    | 1,016  | 1,043  |
| 353    | 342    | 442    | 396    | 421    | 398    | 411    | 424    | 442    |
| 47     | 51     | 63     | 77     | 104    | 98     | 109    | 116    | 124    |
| 4      | 6      | 4      | 6      | 5      | 3      | 2      | 2      | 1      |
| 15,858 | 15,840 | 16,093 | 15,899 | 16,203 | 15,949 | 16,075 | 16,206 | 16,343 |
| 28.99% | 29.20% | 27.95% | 28.03% | 28.00% | 28.40% | 28.51% | 28.61% | 28.73% |

1  
2  
3  
4  
5  
6  
7  
8  
9  
10  
11  
12  
13  
14  
15  
16  
17  
18  
19  
20  
21  
22  
23  
24  
25  
26  
27  
28  
29  
30  
31  
32  
33  
34  
35  
36  
37  
38  
39  
40  
41  
42  
43  
44  
45  
46  
47  
48  
49  
50  
51  
52  
53  
54  
55  
56  
57  
58  
59  
60

## Projected

| 2022   | 2023   | 2024   | 2025   | 2026   | 2027   | 2028   | 2029   | 2030   |
|--------|--------|--------|--------|--------|--------|--------|--------|--------|
| 7      | 7      | 7      | 7      | 7      | 7      | 8      | 8      | 8      |
| 2      | 2      | 2      | 2      | 2      | 2      | 2      | 2      | 2      |
| 3      | 3      | 3      | 2      | 2      | 2      | 2      | 2      | 2      |
| 5      | 5      | 5      | 5      | 5      | 5      | 6      | 5      | 6      |
| 5      | 4      | 4      | 4      | 4      | 4      | 4      | 4      | 4      |
| 10     | 10     | 9      | 9      | 9      | 9      | 8      | 8      | 8      |
| 24     | 23     | 23     | 22     | 20     | 19     | 18     | 16     | 15     |
| 33     | 32     | 32     | 31     | 31     | 31     | 30     | 29     | 28     |
| 40     | 38     | 36     | 33     | 30     | 27     | 24     | 22     | 19     |
| 105    | 98     | 94     | 90     | 87     | 86     | 84     | 81     | 78     |
| 292    | 282    | 269    | 260    | 248    | 236    | 228    | 228    | 229    |
| 426    | 417    | 408    | 395    | 387    | 376    | 360    | 342    | 327    |
| 526    | 522    | 517    | 514    | 503    | 492    | 477    | 461    | 441    |
| 830    | 837    | 847    | 862    | 875    | 885    | 894    | 901    | 910    |
| 1,182  | 1,154  | 1,139  | 1,137  | 1,145  | 1,163  | 1,181  | 1,204  | 1,226  |
| 1,456  | 1,511  | 1,556  | 1,605  | 1,646  | 1,575  | 1,548  | 1,540  | 1,547  |
| 1,284  | 1,303  | 1,326  | 1,342  | 1,378  | 1,479  | 1,538  | 1,587  | 1,640  |
| 985    | 1,001  | 1,013  | 1,022  | 1,021  | 1,027  | 1,044  | 1,063  | 1,077  |
| 525    | 533    | 542    | 551    | 562    | 572    | 586    | 597    | 607    |
| 147    | 149    | 152    | 156    | 161    | 166    | 170    | 175    | 181    |
| 14     | 14     | 14     | 14     | 14     | 14     | 13     | 14     | 14     |
| 0      | 0      | 0      | 0      | 0      | 0      | 0      | 0      | 0      |
| 4      | 4      | 4      | 5      | 5      | 5      | 5      | 5      | 6      |
| 3      | 3      | 3      | 3      | 3      | 3      | 2      | 2      | 2      |
| 5      | 5      | 5      | 5      | 5      | 5      | 5      | 5      | 5      |
| 1      | 1      | 1      | 1      | 1      | 1      | 0      | 0      | 0      |
| 5      | 5      | 4      | 4      | 3      | 3      | 3      | 3      | 2      |
| 17     | 17     | 17     | 17     | 17     | 17     | 16     | 16     | 16     |
| 29     | 29     | 29     | 30     | 30     | 31     | 30     | 30     | 30     |
| 54     | 55     | 56     | 56     | 56     | 56     | 57     | 58     | 59     |
| 88     | 84     | 83     | 83     | 83     | 84     | 85     | 84     | 83     |
| 177    | 167    | 156    | 147    | 137    | 128    | 121    | 118    | 115    |
| 378    | 365    | 352    | 335    | 322    | 307    | 291    | 275    | 261    |
| 646    | 644    | 639    | 635    | 624    | 610    | 594    | 578    | 555    |
| 995    | 1,000  | 1,008  | 1,026  | 1,041  | 1,051  | 1,061  | 1,066  | 1,073  |
| 1,490  | 1,448  | 1,424  | 1,414  | 1,421  | 1,441  | 1,459  | 1,480  | 1,507  |
| 1,540  | 1,599  | 1,633  | 1,674  | 1,695  | 1,610  | 1,567  | 1,545  | 1,536  |
| 1,470  | 1,494  | 1,538  | 1,570  | 1,636  | 1,780  | 1,872  | 1,935  | 2,007  |
| 1,066  | 1,102  | 1,134  | 1,158  | 1,168  | 1,194  | 1,228  | 1,277  | 1,314  |
| 466    | 486    | 505    | 527    | 547    | 564    | 590    | 612    | 630    |
| 129    | 135    | 143    | 152    | 164    | 178    | 190    | 203    | 218    |
| 1      | 0      | 0      | 0      | 0      | 0      | 0      | 0      | 0      |
| 16,461 | 16,588 | 16,731 | 16,903 | 17,096 | 17,242 | 17,402 | 17,579 | 17,787 |
| 28.80% | 28.88% | 28.97% | 29.08% | 29.21% | 29.26% | 29.32% | 29.39% | 29.49% |



1  
2  
3  
4  
5  
6  
7  
8  
9  
10  
11  
12  
13  
14  
15  
16  
17  
18  
19  
20  
21  
22  
23  
24  
25  
26  
27  
28  
29  
30  
31  
32  
33  
34  
35  
36  
37  
38  
39  
40  
41  
42  
43  
44  
45  
46  
47  
48  
49  
50  
51  
52  
53  
54  
55  
56  
57  
58  
59  
60

| 2031   | 2032   | 2033   | 2034   | 2035   | 2036   | 2037   | 2038   | 2039   |
|--------|--------|--------|--------|--------|--------|--------|--------|--------|
| 8      | 8      | 8      | 8      | 8      | 8      | 8      | 8      | 9      |
| 2      | 2      | 2      | 2      | 2      | 2      | 2      | 2      | 2      |
| 2      | 2      | 2      | 2      | 2      | 2      | 2      | 2      | 2      |
| 6      | 5      | 6      | 6      | 6      | 6      | 6      | 6      | 6      |
| 4      | 4      | 3      | 3      | 3      | 3      | 3      | 3      | 3      |
| 8      | 8      | 8      | 9      | 8      | 9      | 9      | 8      | 8      |
| 14     | 12     | 11     | 10     | 10     | 9      | 8      | 8      | 7      |
| 27     | 25     | 24     | 23     | 21     | 20     | 19     | 17     | 17     |
| 16     | 14     | 11     | 8      | 5      | 2      | 0      | 0      | 0      |
| 74     | 70     | 67     | 64     | 60     | 57     | 54     | 50     | 47     |
| 232    | 240    | 246    | 248    | 249    | 250    | 249    | 252    | 254    |
| 309    | 292    | 282    | 278    | 277    | 279    | 286    | 290    | 291    |
| 427    | 409    | 387    | 364    | 343    | 320    | 298    | 284    | 276    |
| 909    | 903    | 892    | 876    | 854    | 840    | 821    | 792    | 757    |
| 1,248  | 1,270  | 1,291  | 1,309  | 1,329  | 1,334  | 1,334  | 1,324  | 1,308  |
| 1,567  | 1,604  | 1,641  | 1,684  | 1,725  | 1,768  | 1,809  | 1,849  | 1,885  |
| 1,682  | 1,615  | 1,593  | 1,590  | 1,602  | 1,629  | 1,672  | 1,715  | 1,765  |
| 1,105  | 1,191  | 1,241  | 1,281  | 1,320  | 1,350  | 1,300  | 1,286  | 1,287  |
| 610    | 619    | 637    | 655    | 668    | 689    | 755    | 794    | 823    |
| 187    | 194    | 201    | 208    | 214    | 217    | 224    | 234    | 245    |
| 14     | 15     | 15     | 15     | 16     | 16     | 17     | 17     | 18     |
| 0      | 0      | 0      | 0      | 0      | 0      | 0      | 0      | 0      |
| 6      | 5      | 5      | 4      | 5      | 4      | 4      | 4      | 4      |
| 2      | 2      | 2      | 2      | 2      | 2      | 2      | 2      | 2      |
| 5      | 5      | 5      | 5      | 6      | 6      | 6      | 6      | 6      |
| 0      | 0      | 0      | 0      | 0      | 0      | 0      | 0      | 0      |
| 2      | 2      | 2      | 2      | 2      | 2      | 1      | 1      | 1      |
| 15     | 15     | 14     | 14     | 14     | 14     | 15     | 15     | 15     |
| 29     | 28     | 28     | 27     | 26     | 25     | 24     | 23     | 23     |
| 60     | 60     | 60     | 60     | 59     | 58     | 56     | 55     | 53     |
| 83     | 82     | 83     | 83     | 83     | 83     | 84     | 83     | 81     |
| 114    | 113    | 112    | 110    | 108    | 105    | 103    | 101    | 100    |
| 246    | 231    | 220    | 215    | 212    | 211    | 212    | 213    | 210    |
| 538    | 517    | 495    | 471    | 450    | 428    | 406    | 389    | 384    |
| 1,067  | 1,058  | 1,043  | 1,026  | 996    | 979    | 952    | 922    | 888    |
| 1,531  | 1,555  | 1,578  | 1,595  | 1,614  | 1,613  | 1,608  | 1,592  | 1,573  |
| 1,546  | 1,571  | 1,593  | 1,619  | 1,651  | 1,678  | 1,706  | 1,733  | 1,752  |
| 2,055  | 1,977  | 1,949  | 1,945  | 1,957  | 1,994  | 2,049  | 2,102  | 2,159  |
| 1,377  | 1,518  | 1,611  | 1,676  | 1,742  | 1,785  | 1,735  | 1,726  | 1,738  |
| 640    | 659    | 686    | 722    | 748    | 789    | 883    | 944    | 987    |
| 232    | 247    | 266    | 283    | 299    | 309    | 328    | 352    | 381    |
| 0      | 0      | 0      | 0      | 0      | 0      | 0      | 0      | 0      |
| 17,998 | 18,146 | 18,320 | 18,502 | 18,698 | 18,894 | 19,047 | 19,206 | 19,366 |
| 29.59% | 29.57% | 29.59% | 29.61% | 29.66% | 29.71% | 29.69% | 29.68% | 29.69% |

|    |             |
|----|-------------|
| 1  |             |
| 2  |             |
| 3  |             |
| 4  | <b>2040</b> |
| 5  | 9           |
| 6  | 2           |
| 7  | 2           |
| 8  | 6           |
| 9  | 3           |
| 10 | 8           |
| 11 | 6           |
| 12 | 16          |
| 13 | 0           |
| 14 | 42          |
| 15 | 256         |
| 16 | 291         |
| 17 | 272         |
| 18 | 728         |
| 19 | 1,282       |
| 20 | 1,924       |
| 21 | 1,813       |
| 22 | 1,300       |
| 23 | 848         |
| 24 | 253         |
| 25 | 18          |
| 26 | 0           |
| 27 | 4           |
| 28 | 2           |
| 29 | 6           |
| 30 | 0           |
| 31 | 1           |
| 32 | 15          |
| 33 | 22          |
| 34 | 52          |
| 35 | 80          |
| 36 | 99          |
| 37 | 208         |
| 38 | 383         |
| 39 | 858         |
| 40 | 1,536       |
| 41 | 1,774       |
| 42 | 2,224       |
| 43 | 1,764       |
| 44 | 1,025       |
| 45 | 403         |
| 46 | 0           |
| 47 |             |
| 48 |             |
| 49 | 19,535      |
| 50 | 29.71%      |
| 51 |             |
| 52 |             |
| 53 |             |
| 54 |             |
| 55 |             |
| 56 |             |
| 57 |             |
| 58 |             |
| 59 |             |
| 60 |             |

For peer review only

1  
2  
3  
4  
5  
6  
7  
8  
9  
10  
11  
12  
13  
14  
15  
16  
17  
18  
19  
20  
21  
22  
23  
24  
25  
26  
27  
28  
29  
30  
31  
32  
33  
34  
35  
36  
37  
38  
39  
40  
41  
42  
43  
44  
45  
46  
47  
48  
49  
50  
51  
52  
53  
54  
55  
56  
57  
58  
59  
60

|                                 | Baseline |        |        |        |        |        |
|---------------------------------|----------|--------|--------|--------|--------|--------|
| Group                           | 2007     | 2008   | 2009   | 2010   | 2011   | 2012   |
| Females 0 - 4                   | 2        | 2      | 1      | 1      | 0      | 2      |
| Females 5 - 9                   | 1        | 1      | 0      | 0      | 2      | 0      |
| Females 10 - 14                 | 2        | 2      | 0      | 3      | 0      | 1      |
| Females 15 - 19                 | 3        | 2      | 3      | 0      | 2      | 1      |
| Females 20 - 24                 | 6        | 3      | 6      | 3      | 5      | 3      |
| Females 25 - 29                 | 13       | 4      | 4      | 5      | 7      | 7      |
| Females 30 - 34                 | 12       | 14     | 19     | 17     | 14     | 16     |
| Females 35 - 39                 | 41       | 41     | 39     | 30     | 39     | 23     |
| Females 40 - 44                 | 60       | 63     | 67     | 62     | 59     | 59     |
| Females 45 - 49                 | 99       | 99     | 95     | 97     | 103    | 85     |
| Females 50 - 54                 | 173      | 152    | 159    | 141    | 158    | 125    |
| Females 55 - 59                 | 232      | 249    | 222    | 199    | 193    | 168    |
| Females 60 - 64                 | 346      | 374    | 334    | 348    | 314    | 300    |
| Females 65 - 69                 | 540      | 505    | 471    | 504    | 428    | 500    |
| Females 70 - 74                 | 825      | 783    | 729    | 718    | 704    | 717    |
| Females 75 - 79                 | 1,175    | 1,223  | 1,111  | 1,020  | 1,050  | 1,040  |
| Females 80 - 84                 | 1,586    | 1,470  | 1,385  | 1,429  | 1,369  | 1,413  |
| Females 85 - 89                 | 1,552    | 1,543  | 1,488  | 1,380  | 1,339  | 1,456  |
| Females 90 - 94                 | 962      | 894    | 872    | 911    | 923    | 958    |
| Females 95 - 99                 | 355      | 393    | 365    | 376    | 373    | 328    |
| Females 100+                    | 62       | 52     | 60     | 66     | 58     | 69     |
| Males 0 - 4                     | 1        | 2      | 0      | 1      | 2      | 3      |
| Males 5 - 9                     | 0        | 1      | 2      | 2      | 0      | 1      |
| Males 10 - 14                   | 1        | 0      | 0      | 1      | 2      | 3      |
| Males 15 - 19                   | 3        | 2      | 3      | 1      | 4      | 3      |
| Males 20 - 24                   | 10       | 3      | 4      | 3      | 4      | 4      |
| Males 25 - 29                   | 10       | 13     | 7      | 19     | 12     | 11     |
| Males 30 - 34                   | 42       | 23     | 28     | 23     | 28     | 34     |
| Males 35 - 39                   | 84       | 75     | 68     | 72     | 59     | 47     |
| Males 40 - 44                   | 186      | 135    | 144    | 138    | 142    | 107    |
| Males 45 - 49                   | 231      | 263    | 230    | 236    | 203    | 227    |
| Males 50 - 54                   | 397      | 337    | 362    | 378    | 312    | 310    |
| Males 55 - 59                   | 582      | 534    | 415    | 473    | 438    | 444    |
| Males 60 - 64                   | 722      | 702    | 695    | 668    | 667    | 625    |
| Males 65 - 69                   | 926      | 923    | 837    | 775    | 767    | 825    |
| Males 70 - 74                   | 1,196    | 1,083  | 998    | 1,021  | 998    | 946    |
| Males 75 - 79                   | 1,398    | 1,317  | 1,210  | 1,207  | 1,142  | 1,196  |
| Males 80 - 84                   | 1,419    | 1,306  | 1,307  | 1,248  | 1,235  | 1,147  |
| Males 85 - 89                   | 1,028    | 1,025  | 1,078  | 977    | 1,035  | 1,077  |
| Males 90 - 94                   | 450      | 407    | 356    | 467    | 438    | 482    |
| Males 95 - 99                   | 99       | 95     | 139    | 110    | 108    | 115    |
| Males 100+                      | 12       | 15     | 12     | 16     | 12     | 10     |
| <b>Organ Failure Deaths</b>     | 16,844   | 16,130 | 15,325 | 15,146 | 14,748 | 14,888 |
| <b>Percentage of All Deaths</b> | 30.09%   | 28.96% | 28.46% | 28.07% | 27.48% | 27.10% |

|    | 2013   | 2014   | 2015   | 2016   | 2017   | 2018   | 2019   | 2020   | 2021   |
|----|--------|--------|--------|--------|--------|--------|--------|--------|--------|
| 1  |        |        |        |        |        |        |        |        |        |
| 2  |        |        |        |        |        |        |        |        |        |
| 3  |        |        |        |        |        |        |        |        |        |
| 4  |        |        |        |        |        |        |        |        |        |
| 5  | 2      | 0      | 0      | 1      | 2      | 2      | 2      | 2      | 2      |
| 6  | 0      | 0      | 0      | 1      | 0      | 0      | 0      | 0      | 0      |
| 7  | 3      | 1      | 1      | 0      | 2      | 1      | 1      | 1      | 1      |
| 8  | 2      | 2      | 1      | 2      | 2      | 2      | 2      | 2      | 2      |
| 9  | 4      | 1      | 1      | 2      | 3      | 3      | 2      | 2      | 2      |
| 10 | 7      | 3      | 6      | 6      | 5      | 5      | 5      | 4      | 3      |
| 11 | 14     | 11     | 12     | 15     | 13     | 15     | 15     | 16     | 16     |
| 12 | 30     | 17     | 31     | 26     | 20     | 14     | 12     | 11     | 9      |
| 13 | 48     | 61     | 55     | 47     | 52     | 43     | 42     | 42     | 43     |
| 14 | 94     | 94     | 97     | 85     | 74     | 73     | 69     | 65     | 61     |
| 15 | 146    | 114    | 135    | 148    | 151    | 142    | 136    | 128    | 122    |
| 16 | 194    | 213    | 221    | 200    | 221    | 217    | 215    | 213    | 210    |
| 17 | 282    | 278    | 280    | 316    | 349    | 338    | 343    | 348    | 354    |
| 18 | 465    | 482    | 466    | 502    | 482    | 462    | 448    | 439    | 434    |
| 19 | 663    | 589    | 695    | 707    | 722    | 757    | 761    | 767    | 767    |
| 20 | 1,001  | 937    | 1,008  | 970    | 927    | 874    | 857    | 836    | 827    |
| 21 | 1,286  | 1,239  | 1,308  | 1,249  | 1,212  | 1,188  | 1,160  | 1,130  | 1,088  |
| 22 | 1,343  | 1,347  | 1,424  | 1,398  | 1,384  | 1,324  | 1,303  | 1,281  | 1,257  |
| 23 | 991    | 946    | 1,096  | 960    | 1,018  | 942    | 939    | 939    | 940    |
| 24 | 329    | 320    | 376    | 372    | 421    | 394    | 402    | 398    | 401    |
| 25 | 68     | 74     | 84     | 67     | 61     | 54     | 51     | 58     | 61     |
| 26 |        |        |        |        |        |        |        |        |        |
| 27 | 0      | 1      | 1      | 1      | 2      | 2      | 2      | 2      | 2      |
| 28 | 1      | 0      | 0      | 0      | 1      | 2      | 2      | 2      | 2      |
| 29 | 4      | 2      | 1      | 2      | 0      | 0      | 0      | 0      | 0      |
| 30 | 1      | 1      | 4      | 2      | 4      | 4      | 4      | 4      | 4      |
| 31 | 4      | 5      | 5      | 4      | 4      | 4      | 4      | 3      | 3      |
| 32 | 8      | 12     | 7      | 18     | 10     | 9      | 9      | 8      | 8      |
| 33 | 30     | 22     | 28     | 20     | 30     | 24     | 24     | 23     | 22     |
| 34 | 45     | 53     | 48     | 40     | 56     | 50     | 48     | 46     | 44     |
| 35 | 139    | 119    | 105    | 104    | 86     | 71     | 65     | 59     | 53     |
| 36 | 209    | 212    | 202    | 184    | 228    | 183    | 174    | 165    | 156    |
| 37 | 338    | 304    | 298    | 336    | 309    | 272    | 258    | 241    | 227    |
| 38 | 442    | 409    | 418    | 485    | 459    | 456    | 447    | 439    | 426    |
| 39 | 568    | 525    | 592    | 565    | 612    | 591    | 590    | 591    | 590    |
| 40 | 809    | 834    | 829    | 842    | 840    | 798    | 764    | 738    | 722    |
| 41 | 976    | 940    | 1,021  | 968    | 982    | 1,025  | 1,020  | 1,019  | 1,005  |
| 42 | 1,188  | 1,146  | 1,147  | 1,127  | 1,148  | 1,064  | 1,055  | 1,040  | 1,045  |
| 43 | 1,263  | 1,224  | 1,307  | 1,250  | 1,238  | 1,174  | 1,157  | 1,131  | 1,094  |
| 44 | 955    | 1,012  | 1,076  | 991    | 1,059  | 1,018  | 1,010  | 1,006  | 994    |
| 45 | 559    | 581    | 592    | 569    | 558    | 511    | 511    | 510    | 513    |
| 46 | 127    | 113    | 143    | 146    | 156    | 143    | 154    | 159    | 165    |
| 47 | 12     | 16     | 19     | 21     | 25     | 16     | 15     | 18     | 20     |
| 48 |        |        |        |        |        |        |        |        |        |
| 49 |        |        |        |        |        |        |        |        |        |
| 50 | 14,650 | 14,260 | 15,140 | 14,749 | 14,928 | 14,267 | 14,077 | 13,887 | 13,696 |
| 51 | 26.78% | 26.29% | 26.30% | 26.00% | 25.80% | 25.41% | 24.96% | 24.52% | 24.08% |
| 52 |        |        |        |        |        |        |        |        |        |
| 53 |        |        |        |        |        |        |        |        |        |
| 54 |        |        |        |        |        |        |        |        |        |
| 55 |        |        |        |        |        |        |        |        |        |
| 56 |        |        |        |        |        |        |        |        |        |
| 57 |        |        |        |        |        |        |        |        |        |
| 58 |        |        |        |        |        |        |        |        |        |
| 59 |        |        |        |        |        |        |        |        |        |
| 60 |        |        |        |        |        |        |        |        |        |

1  
2  
3  
4  
5  
6  
7  
8  
9  
10  
11  
12  
13  
14  
15  
16  
17  
18  
19  
20  
21  
22  
23  
24  
25  
26  
27  
28  
29  
30  
31  
32  
33  
34  
35  
36  
37  
38  
39  
40  
41  
42  
43  
44  
45  
46  
47  
48  
49  
50  
51  
52  
53  
54  
55  
56  
57  
58  
59  
60

|        |        |        |        |        |        |        | Projected |        |  |
|--------|--------|--------|--------|--------|--------|--------|-----------|--------|--|
| 2022   | 2023   | 2024   | 2025   | 2026   | 2027   | 2028   | 2029      | 2030   |  |
| 2      | 2      | 3      | 3      | 3      | 3      | 3      | 3         | 3      |  |
| 0      | 0      | 0      | 0      | 0      | 0      | 0      | 0         | 0      |  |
| 1      | 1      | 1      | 1      | 1      | 1      | 1      | 1         | 1      |  |
| 2      | 2      | 2      | 2      | 2      | 2      | 2      | 1         | 1      |  |
| 2      | 1      | 1      | 1      | 1      | 1      | 1      | 0         | 0      |  |
| 2      | 1      | 0      | 0      | 0      | 0      | 0      | 0         | 0      |  |
| 16     | 16     | 17     | 17     | 17     | 16     | 16     | 15        | 15     |  |
| 7      | 5      | 3      | 1      | 0      | 0      | 0      | 0         | 0      |  |
| 44     | 44     | 44     | 44     | 44     | 43     | 43     | 43        | 43     |  |
| 57     | 54     | 53     | 52     | 52     | 52     | 53     | 52        | 51     |  |
| 116    | 108    | 100    | 93     | 85     | 78     | 73     | 70        | 68     |  |
| 205    | 199    | 192    | 184    | 179    | 172    | 163    | 153       | 145    |  |
| 359    | 363    | 367    | 372    | 373    | 372    | 368    | 363       | 355    |  |
| 433    | 432    | 433    | 436    | 438    | 438    | 438    | 437       | 436    |  |
| 717    | 687    | 667    | 654    | 647    | 645    | 644    | 645       | 645    |  |
| 854    | 854    | 847    | 842    | 830    | 764    | 722    | 690       | 665    |  |
| 1,055  | 1,031  | 1,010  | 984    | 971    | 1,001  | 1,000  | 989       | 979    |  |
| 1,232  | 1,216  | 1,195  | 1,170  | 1,133  | 1,105  | 1,089  | 1,073     | 1,051  |  |
| 946    | 943    | 940    | 938    | 937    | 935    | 939    | 938       | 935    |  |
| 400    | 401    | 407    | 414    | 424    | 435    | 442    | 451       | 462    |  |
| 63     | 62     | 62     | 62     | 63     | 63     | 63     | 65        | 66     |  |
| 2      | 2      | 2      | 3      | 3      | 3      | 3      | 3         | 3      |  |
| 2      | 2      | 2      | 3      | 3      | 3      | 3      | 3         | 3      |  |
| 0      | 0      | 0      | 0      | 0      | 0      | 0      | 0         | 0      |  |
| 4      | 4      | 4      | 5      | 5      | 5      | 5      | 5         | 5      |  |
| 3      | 3      | 2      | 2      | 2      | 2      | 2      | 2         | 2      |  |
| 8      | 8      | 7      | 7      | 7      | 6      | 6      | 6         | 6      |  |
| 21     | 20     | 19     | 18     | 17     | 15     | 14     | 13        | 12     |  |
| 42     | 40     | 39     | 37     | 35     | 34     | 32     | 29        | 27     |  |
| 48     | 43     | 36     | 30     | 23     | 17     | 10     | 4         | 0      |  |
| 147    | 140    | 137    | 136    | 135    | 136    | 136    | 133       | 132    |  |
| 213    | 198    | 183    | 169    | 156    | 143    | 133    | 127       | 122    |  |
| 411    | 396    | 379    | 359    | 344    | 327    | 308    | 289       | 273    |  |
| 590    | 589    | 586    | 584    | 575    | 564    | 551    | 537       | 517    |  |
| 714    | 703    | 696    | 694    | 691    | 683    | 676    | 665       | 656    |  |
| 928    | 878    | 841    | 813    | 795    | 784    | 772    | 761       | 754    |  |
| 1,096  | 1,110  | 1,106  | 1,105  | 1,090  | 1,009  | 956    | 917       | 887    |  |
| 1,071  | 1,050  | 1,041  | 1,023  | 1,026  | 1,074  | 1,085  | 1,077     | 1,072  |  |
| 977    | 972    | 960    | 941    | 910    | 891    | 877    | 872       | 857    |  |
| 522    | 526    | 527    | 529    | 529    | 525    | 527    | 524       | 518    |  |
| 167    | 169    | 175    | 181    | 190    | 200    | 208    | 216       | 226    |  |
| 21     | 22     | 22     | 23     | 24     | 24     | 24     | 25        | 25     |  |
| 13,497 | 13,300 | 13,110 | 12,931 | 12,758 | 12,570 | 12,383 | 12,198    | 12,015 |  |
| 23.62% | 23.16% | 22.70% | 22.25% | 21.80% | 21.33% | 20.86% | 20.39%    | 19.92% |  |

|    | 2031   | 2032   | 2033   | 2034   | 2035   | 2036   | 2037   | 2038   | 2039   |
|----|--------|--------|--------|--------|--------|--------|--------|--------|--------|
| 1  |        |        |        |        |        |        |        |        |        |
| 2  |        |        |        |        |        |        |        |        |        |
| 3  |        |        |        |        |        |        |        |        |        |
| 4  |        |        |        |        |        |        |        |        |        |
| 5  | 3      | 3      | 3      | 3      | 3      | 3      | 3      | 3      | 3      |
| 6  | 0      | 0      | 0      | 0      | 0      | 0      | 0      | 0      | 0      |
| 7  | 1      | 1      | 1      | 1      | 1      | 1      | 1      | 1      | 0      |
| 8  | 1      | 1      | 1      | 1      | 1      | 1      | 1      | 1      | 1      |
| 9  | 0      | 0      | 0      | 0      | 0      | 0      | 0      | 0      | 0      |
| 10 | 0      | 0      | 0      | 0      | 0      | 0      | 0      | 0      | 0      |
| 11 | 15     | 14     | 14     | 13     | 14     | 14     | 14     | 14     | 14     |
| 12 | 0      | 0      | 0      | 0      | 0      | 0      | 0      | 0      | 0      |
| 13 | 43     | 43     | 42     | 42     | 41     | 40     | 38     | 37     | 35     |
| 14 | 50     | 49     | 48     | 48     | 47     | 47     | 46     | 45     | 44     |
| 15 | 66     | 65     | 64     | 62     | 59     | 57     | 54     | 52     | 50     |
| 16 | 136    | 127    | 121    | 118    | 116    | 116    | 117    | 118    | 117    |
| 17 | 350    | 343    | 332    | 318    | 307    | 292    | 279    | 271    | 269    |
| 18 | 431    | 424    | 414    | 402    | 388    | 377    | 365    | 348    | 329    |
| 19 | 645    | 644    | 643    | 640    | 638    | 629    | 617    | 602    | 583    |
| 20 | 646    | 633    | 620    | 609    | 596    | 583    | 568    | 552    | 535    |
| 21 | 962    | 883    | 832    | 792    | 761    | 736    | 718    | 698    | 680    |
| 22 | 1,043  | 1,086  | 1,092  | 1,087  | 1,079  | 1,062  | 984    | 935    | 898    |
| 23 | 920    | 914    | 921    | 927    | 925    | 934    | 1,001  | 1,031  | 1,044  |
| 24 | 475    | 488    | 503    | 516    | 528    | 533    | 544    | 566    | 587    |
| 25 | 69     | 71     | 72     | 75     | 79     | 82     | 86     | 89     | 93     |
| 26 |        |        |        |        |        |        |        |        |        |
| 27 | 3      | 3      | 3      | 3      | 3      | 3      | 3      | 3      | 3      |
| 28 | 3      | 3      | 3      | 3      | 3      | 2      | 3      | 2      | 2      |
| 29 | 0      | 0      | 0      | 0      | 0      | 0      | 0      | 0      | 0      |
| 30 | 5      | 5      | 5      | 5      | 5      | 5      | 5      | 6      | 5      |
| 31 | 2      | 2      | 2      | 2      | 2      | 2      | 1      | 1      | 1      |
| 32 | 6      | 6      | 6      | 6      | 6      | 6      | 6      | 6      | 6      |
| 33 | 11     | 10     | 9      | 8      | 7      | 6      | 6      | 5      | 5      |
| 34 | 24     | 22     | 19     | 17     | 15     | 13     | 11     | 9      | 7      |
| 35 | 0      | 0      | 0      | 0      | 0      | 0      | 0      | 0      | 0      |
| 36 | 129    | 128    | 127    | 127    | 125    | 125    | 124    | 122    | 119    |
| 37 | 118    | 115    | 112    | 107    | 102    | 97     | 92     | 88     | 84     |
| 38 | 256    | 239    | 226    | 220    | 216    | 213    | 213    | 213    | 209    |
| 39 | 503    | 485    | 466    | 444    | 425    | 406    | 386    | 371    | 367    |
| 40 | 639    | 620    | 599    | 577    | 548    | 526    | 501    | 474    | 446    |
| 41 | 743    | 733    | 722    | 708    | 694    | 672    | 649    | 622    | 594    |
| 42 | 867    | 856    | 843    | 831    | 821    | 808    | 795    | 781    | 763    |
| 43 | 1,051  | 968    | 913    | 870    | 835    | 810    | 792    | 771    | 751    |
| 44 | 856    | 898    | 906    | 895    | 881    | 853    | 782    | 732    | 692    |
| 45 | 503    | 495    | 491    | 492    | 485    | 485    | 514    | 518    | 510    |
| 46 | 235    | 243    | 255    | 264    | 272    | 274    | 282    | 295    | 312    |
| 47 | 26     | 27     | 28     | 28     | 29     | 29     | 30     | 30     | 30     |
| 48 |        |        |        |        |        |        |        |        |        |
| 49 | 11,836 | 11,647 | 11,457 | 11,260 | 11,057 | 10,842 | 10,630 | 10,411 | 10,188 |
| 50 | 19.46% | 18.98% | 18.50% | 18.02% | 17.54% | 17.05% | 16.57% | 16.09% | 15.62% |
| 51 |        |        |        |        |        |        |        |        |        |
| 52 |        |        |        |        |        |        |        |        |        |
| 53 |        |        |        |        |        |        |        |        |        |
| 54 |        |        |        |        |        |        |        |        |        |
| 55 |        |        |        |        |        |        |        |        |        |
| 56 |        |        |        |        |        |        |        |        |        |
| 57 |        |        |        |        |        |        |        |        |        |
| 58 |        |        |        |        |        |        |        |        |        |
| 59 |        |        |        |        |        |        |        |        |        |
| 60 |        |        |        |        |        |        |        |        |        |

|    |             |
|----|-------------|
| 1  |             |
| 2  |             |
| 3  |             |
| 4  | <b>2040</b> |
| 5  | 3           |
| 6  | 0           |
| 7  | 0           |
| 8  | 1           |
| 9  | 0           |
| 10 | 0           |
| 11 | 0           |
| 12 | 14          |
| 13 | 0           |
| 14 | 34          |
| 15 | 43          |
| 16 | 47          |
| 17 | 115         |
| 18 | 271         |
| 19 | 313         |
| 20 | 561         |
| 21 | 518         |
| 22 | 660         |
| 23 | 869         |
| 24 | 1,051       |
| 25 | 602         |
| 26 | 96          |
| 27 |             |
| 28 | 3           |
| 29 | 2           |
| 30 | 0           |
| 31 | 5           |
| 32 | 1           |
| 33 | 6           |
| 34 | 4           |
| 35 | 6           |
| 36 | 0           |
| 37 | 115         |
| 38 | 80          |
| 39 | 205         |
| 40 | 367         |
| 41 | 421         |
| 42 | 561         |
| 43 | 746         |
| 44 | 731         |
| 45 | 657         |
| 46 | 498         |
| 47 | 321         |
| 48 | 29          |
| 49 |             |
| 50 | 9,957       |
| 51 | 15.14%      |
| 52 |             |
| 53 |             |
| 54 |             |
| 55 |             |
| 56 |             |
| 57 |             |
| 58 |             |
| 59 |             |
| 60 |             |

For peer review only

1  
2  
3  
4  
5  
6  
7  
8  
9  
10  
11  
12  
13  
14  
15  
16  
17  
18  
19  
20  
21  
22  
23  
24  
25  
26  
27  
28  
29  
30  
31  
32  
33  
34  
35  
36  
37  
38  
39  
40  
41  
42  
43  
44  
45  
46  
47  
48  
49  
50  
51  
52  
53  
54  
55  
56  
57  
58  
59  
60

|                                 | Baseline     |              |              |              |              |              |
|---------------------------------|--------------|--------------|--------------|--------------|--------------|--------------|
| Group                           | 2007         | 2008         | 2009         | 2010         | 2011         | 2012         |
| Females 0 - 4                   | 0            | 0            | 0            | 0            | 0            | 0            |
| Females 5 - 9                   | 0            | 0            | 0            | 0            | 0            | 0            |
| Females 10 - 14                 | 0            | 0            | 0            | 0            | 0            | 0            |
| Females 15 - 19                 | 0            | 0            | 0            | 0            | 0            | 0            |
| Females 20 - 24                 | 0            | 0            | 0            | 0            | 0            | 0            |
| Females 25 - 29                 | 0            | 0            | 0            | 0            | 0            | 0            |
| Females 30 - 34                 | 0            | 0            | 0            | 0            | 0            | 0            |
| Females 35 - 39                 | 0            | 0            | 0            | 0            | 0            | 0            |
| Females 40 - 44                 | 0            | 0            | 0            | 0            | 0            | 0            |
| Females 45 - 49                 | 1            | 1            | 2            | 1            | 0            | 0            |
| Females 50 - 54                 | 0            | 5            | 0            | 1            | 2            | 0            |
| Females 55 - 59                 | 2            | 7            | 3            | 1            | 4            | 4            |
| Females 60 - 64                 | 14           | 13           | 15           | 9            | 13           | 14           |
| Females 65 - 69                 | 28           | 19           | 32           | 25           | 23           | 40           |
| Females 70 - 74                 | 71           | 86           | 73           | 87           | 65           | 98           |
| Females 75 - 79                 | 194          | 231          | 206          | 214          | 213          | 275          |
| Females 80 - 84                 | 438          | 466          | 406          | 438          | 497          | 598          |
| Females 85 - 89                 | 611          | 695          | 778          | 737          | 837          | 948          |
| Females 90 - 94                 | 588          | 578          | 585          | 624          | 777          | 955          |
| Females 95 - 99                 | 309          | 313          | 273          | 351          | 378          | 435          |
| Females 100+                    | 71           | 69           | 91           | 86           | 90           | 102          |
| Males 0 - 4                     | 0            | 0            | 0            | 0            | 0            | 0            |
| Males 5 - 9                     | 0            | 0            | 0            | 0            | 0            | 0            |
| Males 10 - 14                   | 0            | 0            | 0            | 0            | 0            | 0            |
| Males 15 - 19                   | 0            | 0            | 0            | 0            | 0            | 0            |
| Males 20 - 24                   | 0            | 0            | 0            | 0            | 0            | 0            |
| Males 25 - 29                   | 0            | 0            | 0            | 0            | 0            | 0            |
| Males 30 - 34                   | 0            | 0            | 0            | 0            | 0            | 0            |
| Males 35 - 39                   | 0            | 0            | 0            | 0            | 0            | 0            |
| Males 40 - 44                   | 0            | 0            | 0            | 0            | 0            | 0            |
| Males 45 - 49                   | 1            | 0            | 0            | 1            | 0            | 0            |
| Males 50 - 54                   | 1            | 2            | 3            | 1            | 1            | 3            |
| Males 55 - 59                   | 2            | 2            | 2            | 3            | 1            | 2            |
| Males 60 - 64                   | 12           | 11           | 22           | 16           | 14           | 16           |
| Males 65 - 69                   | 29           | 24           | 28           | 29           | 17           | 37           |
| Males 70 - 74                   | 70           | 79           | 77           | 58           | 76           | 75           |
| Males 75 - 79                   | 144          | 139          | 140          | 181          | 164          | 179          |
| Males 80 - 84                   | 221          | 271          | 249          | 276          | 336          | 360          |
| Males 85 - 89                   | 228          | 220          | 275          | 270          | 380          | 402          |
| Males 90 - 94                   | 134          | 154          | 136          | 176          | 208          | 271          |
| Males 95 - 99                   | 45           | 52           | 50           | 61           | 77           | 77           |
| Males 100+                      | 2            | 12           | 9            | 11           | 6            | 15           |
| <b>Dementia Deaths</b>          | <b>3,216</b> | <b>3,449</b> | <b>3,455</b> | <b>3,657</b> | <b>4,179</b> | <b>4,906</b> |
| <b>Percentage of All Deaths</b> | <b>5.74%</b> | <b>6.19%</b> | <b>6.42%</b> | <b>6.78%</b> | <b>7.79%</b> | <b>8.93%</b> |



1  
2  
3  
4  
5  
6  
7  
8  
9  
10  
11  
12  
13  
14  
15  
16  
17  
18  
19  
20  
21  
22  
23  
24  
25  
26  
27  
28  
29  
30  
31  
32  
33  
34  
35  
36  
37  
38  
39  
40  
41  
42  
43  
44  
45  
46  
47  
48  
49  
50  
51  
52  
53  
54  
55  
56  
57  
58  
59  
60

|  | 2013  | 2014  | 2015   | 2016   | 2017   | 2018   | 2019   | 2020   | 2021   |
|--|-------|-------|--------|--------|--------|--------|--------|--------|--------|
|  | 0     | 0     | 0      | 0      | 0      | 0      | 0      | 0      | 0      |
|  | 0     | 0     | 0      | 0      | 0      | 0      | 0      | 0      | 0      |
|  | 0     | 0     | 0      | 0      | 0      | 0      | 0      | 0      | 0      |
|  | 0     | 0     | 0      | 0      | 0      | 0      | 0      | 0      | 0      |
|  | 0     | 0     | 0      | 0      | 0      | 0      | 0      | 0      | 0      |
|  | 0     | 0     | 0      | 0      | 0      | 0      | 0      | 0      | 0      |
|  | 0     | 0     | 0      | 0      | 0      | 0      | 0      | 0      | 0      |
|  | 0     | 0     | 0      | 0      | 0      | 0      | 0      | 0      | 0      |
|  | 0     | 0     | 0      | 0      | 0      | 0      | 0      | 0      | 0      |
|  | 0     | 0     | 0      | 0      | 0      | 0      | 0      | 0      | 0      |
|  | 0     | 0     | 0      | 0      | 0      | 0      | 0      | 0      | 0      |
|  | 0     | 0     | 0      | 0      | 0      | 0      | 0      | 0      | 0      |
|  | 0     | 0     | 0      | 0      | 0      | 0      | 0      | 0      | 0      |
|  | 0     | 0     | 0      | 0      | 0      | 0      | 0      | 0      | 0      |
|  | 2     | 0     | 1      | 0      | 0      | 0      | 0      | 0      | 0      |
|  | 1     | 0     | 1      | 2      | 1      | 1      | 1      | 1      | 1      |
|  | 1     | 7     | 6      | 9      | 2      | 2      | 2      | 2      | 2      |
|  | 17    | 12    | 14     | 16     | 21     | 21     | 22     | 23     | 24     |
|  | 36    | 24    | 51     | 46     | 38     | 38     | 38     | 38     | 39     |
|  | 105   | 94    | 108    | 115    | 119    | 131    | 139    | 147    | 154    |
|  | 251   | 282   | 290    | 308    | 361    | 365    | 383    | 399    | 421    |
|  | 652   | 666   | 691    | 633    | 788    | 828    | 866    | 902    | 928    |
|  | 1,021 | 945   | 1,162  | 1,096  | 1,316  | 1,349  | 1,421  | 1,492  | 1,562  |
|  | 1,000 | 1,035 | 1,176  | 1,091  | 1,269  | 1,243  | 1,308  | 1,380  | 1,454  |
|  | 420   | 409   | 485    | 495    | 543    | 525    | 553    | 564    | 585    |
|  | 107   | 97    | 98     | 103    | 97     | 88     | 86     | 101    | 109    |
|  | 0     | 0     | 0      | 0      | 0      | 0      | 0      | 0      | 0      |
|  | 0     | 0     | 0      | 0      | 0      | 0      | 0      | 0      | 0      |
|  | 0     | 0     | 0      | 0      | 0      | 0      | 0      | 0      | 0      |
|  | 0     | 0     | 0      | 0      | 0      | 0      | 0      | 0      | 0      |
|  | 0     | 0     | 0      | 0      | 0      | 0      | 0      | 0      | 0      |
|  | 0     | 0     | 0      | 0      | 0      | 0      | 0      | 0      | 0      |
|  | 0     | 0     | 0      | 0      | 0      | 0      | 0      | 0      | 0      |
|  | 0     | 0     | 0      | 0      | 0      | 0      | 0      | 0      | 0      |
|  | 0     | 0     | 1      | 0      | 0      | 0      | 0      | 0      | 0      |
|  | 1     | 0     | 0      | 0      | 0      | 0      | 0      | 0      | 0      |
|  | 2     | 2     | 2      | 2      | 1      | 1      | 1      | 1      | 1      |
|  | 1     | 4     | 3      | 3      | 5      | 5      | 6      | 6      | 6      |
|  | 8     | 15    | 11     | 10     | 11     | 11     | 11     | 11     | 11     |
|  | 36    | 33    | 35     | 45     | 31     | 30     | 29     | 29     | 29     |
|  | 78    | 68    | 93     | 105    | 113    | 125    | 131    | 139    | 144    |
|  | 194   | 204   | 257    | 217    | 313    | 312    | 332    | 350    | 376    |
|  | 352   | 398   | 438    | 426    | 511    | 522    | 554    | 582    | 604    |
|  | 451   | 479   | 566    | 548    | 665    | 692    | 742    | 798    | 849    |
|  | 288   | 328   | 374    | 378    | 424    | 419    | 450    | 483    | 522    |
|  | 74    | 87    | 91     | 108    | 131    | 126    | 142    | 154    | 168    |
|  | 9     | 12    | 8      | 22     | 16     | 11     | 12     | 15     | 19     |
|  | 5,107 | 5,201 | 5,962  | 5,778  | 6,776  | 6,846  | 7,230  | 7,617  | 8,008  |
|  | 9.34% | 9.59% | 10.36% | 10.19% | 11.71% | 12.19% | 12.82% | 13.45% | 14.08% |

1  
2  
3  
4  
5  
6  
7  
8  
9  
10  
11  
12  
13  
14  
15  
16  
17  
18  
19  
20  
21  
22  
23  
24  
25  
26  
27  
28  
29  
30  
31  
32  
33  
34  
35  
36  
37  
38  
39  
40  
41  
42  
43  
44  
45  
46  
47  
48  
49  
50  
51  
52  
53  
54  
55  
56  
57  
58  
59  
60

## Projected

| 2022   | 2023   | 2024   | 2025   | 2026   | 2027   | 2028   | 2029   | 2030   |
|--------|--------|--------|--------|--------|--------|--------|--------|--------|
| 0      | 0      | 0      | 0      | 0      | 0      | 0      | 0      | 0      |
| 0      | 0      | 0      | 0      | 0      | 0      | 0      | 0      | 0      |
| 0      | 0      | 0      | 0      | 0      | 0      | 0      | 0      | 0      |
| 0      | 0      | 0      | 0      | 0      | 0      | 0      | 0      | 0      |
| 0      | 0      | 0      | 0      | 0      | 0      | 0      | 0      | 0      |
| 0      | 0      | 0      | 0      | 0      | 0      | 0      | 0      | 0      |
| 0      | 0      | 0      | 0      | 0      | 0      | 0      | 0      | 0      |
| 0      | 0      | 0      | 0      | 0      | 0      | 0      | 0      | 0      |
| 0      | 0      | 0      | 0      | 0      | 0      | 0      | 0      | 0      |
| 0      | 0      | 0      | 0      | 0      | 0      | 0      | 0      | 0      |
| 0      | 0      | 0      | 0      | 0      | 0      | 0      | 0      | 0      |
| 0      | 0      | 0      | 0      | 0      | 0      | 0      | 0      | 0      |
| 0      | 0      | 0      | 0      | 0      | 0      | 0      | 0      | 0      |
| 0      | 0      | 0      | 0      | 0      | 0      | 0      | 0      | 0      |
| 0      | 0      | 0      | 0      | 0      | 0      | 0      | 0      | 0      |
| 1      | 1      | 1      | 1      | 1      | 1      | 1      | 1      | 1      |
| 2      | 2      | 2      | 2      | 2      | 2      | 2      | 1      | 1      |
| 25     | 26     | 26     | 27     | 28     | 28     | 29     | 29     | 29     |
| 41     | 42     | 43     | 45     | 47     | 48     | 50     | 51     | 52     |
| 151    | 151    | 153    | 157    | 161    | 168    | 174    | 181    | 189    |
| 463    | 494    | 521    | 551    | 577    | 565    | 567    | 575    | 589    |
| 960    | 1,001  | 1,044  | 1,083  | 1,139  | 1,249  | 1,327  | 1,398  | 1,473  |
| 1,630  | 1,713  | 1,789  | 1,860  | 1,911  | 1,977  | 2,065  | 2,158  | 2,240  |
| 1,540  | 1,612  | 1,687  | 1,765  | 1,848  | 1,930  | 2,026  | 2,117  | 2,203  |
| 602    | 621    | 647    | 677    | 711    | 750    | 781    | 818    | 858    |
| 116    | 118    | 122    | 125    | 131    | 134    | 138    | 145    | 153    |
| 0      | 0      | 0      | 0      | 0      | 0      | 0      | 0      | 0      |
| 0      | 0      | 0      | 0      | 0      | 0      | 0      | 0      | 0      |
| 0      | 0      | 0      | 0      | 0      | 0      | 0      | 0      | 0      |
| 0      | 0      | 0      | 0      | 0      | 0      | 0      | 0      | 0      |
| 0      | 0      | 0      | 0      | 0      | 0      | 0      | 0      | 0      |
| 0      | 0      | 0      | 0      | 0      | 0      | 0      | 0      | 0      |
| 0      | 0      | 0      | 0      | 0      | 0      | 0      | 0      | 0      |
| 0      | 0      | 0      | 0      | 0      | 0      | 0      | 0      | 0      |
| 0      | 0      | 0      | 0      | 0      | 0      | 0      | 0      | 0      |
| 1      | 1      | 1      | 1      | 1      | 1      | 1      | 1      | 1      |
| 6      | 6      | 7      | 7      | 7      | 7      | 7      | 7      | 7      |
| 11     | 11     | 11     | 11     | 11     | 11     | 11     | 11     | 10     |
| 29     | 29     | 29     | 30     | 30     | 30     | 30     | 31     | 31     |
| 140    | 140    | 141    | 143    | 147    | 153    | 158    | 164    | 170    |
| 420    | 454    | 480    | 510    | 535    | 524    | 527    | 535    | 548    |
| 633    | 664    | 704    | 739    | 791    | 883    | 952    | 1,007  | 1,068  |
| 898    | 959    | 1,018  | 1,070  | 1,110  | 1,165  | 1,229  | 1,309  | 1,379  |
| 569    | 615    | 659    | 708    | 757    | 803    | 862    | 919    | 970    |
| 178    | 188    | 203    | 219    | 239    | 262    | 283    | 306    | 332    |
| 21     | 24     | 26     | 30     | 33     | 36     | 39     | 44     | 49     |
| 8,436  | 8,870  | 9,315  | 9,761  | 10,216 | 10,727 | 11,258 | 11,805 | 12,351 |
| 14.76% | 15.44% | 16.13% | 16.79% | 17.45% | 18.21% | 18.97% | 19.73% | 20.48% |

1  
2  
3  
4  
5  
6  
7  
8  
9  
10  
11  
12  
13  
14  
15  
16  
17  
18  
19  
20  
21  
22  
23  
24  
25  
26  
27  
28  
29  
30  
31  
32  
33  
34  
35  
36  
37  
38  
39  
40  
41  
42  
43  
44  
45  
46  
47  
48  
49  
50  
51  
52  
53  
54  
55  
56  
57  
58  
59  
60

| 2031   | 2032   | 2033   | 2034   | 2035   | 2036   | 2037   | 2038   | 2039   |
|--------|--------|--------|--------|--------|--------|--------|--------|--------|
| 0      | 0      | 0      | 0      | 0      | 0      | 0      | 0      | 0      |
| 0      | 0      | 0      | 0      | 0      | 0      | 0      | 0      | 0      |
| 0      | 0      | 0      | 0      | 0      | 0      | 0      | 0      | 0      |
| 0      | 0      | 0      | 0      | 0      | 0      | 0      | 0      | 0      |
| 0      | 0      | 0      | 0      | 0      | 0      | 0      | 0      | 0      |
| 0      | 0      | 0      | 0      | 0      | 0      | 0      | 0      | 0      |
| 0      | 0      | 0      | 0      | 0      | 0      | 0      | 0      | 0      |
| 0      | 0      | 0      | 0      | 0      | 0      | 0      | 0      | 0      |
| 0      | 0      | 0      | 0      | 0      | 0      | 0      | 0      | 0      |
| 0      | 0      | 0      | 0      | 0      | 0      | 0      | 0      | 0      |
| 0      | 0      | 0      | 0      | 0      | 0      | 0      | 0      | 0      |
| 0      | 0      | 0      | 0      | 0      | 0      | 0      | 0      | 0      |
| 0      | 0      | 0      | 0      | 0      | 0      | 0      | 0      | 0      |
| 0      | 0      | 0      | 0      | 0      | 0      | 0      | 0      | 0      |
| 0      | 0      | 0      | 0      | 0      | 0      | 0      | 0      | 0      |
| 2      | 2      | 2      | 2      | 2      | 2      | 2      | 2      | 2      |
| 1      | 1      | 1      | 1      | 1      | 1      | 1      | 1      | 1      |
| 29     | 29     | 28     | 28     | 27     | 26     | 25     | 25     | 25     |
| 53     | 54     | 54     | 54     | 54     | 53     | 53     | 52     | 50     |
| 196    | 203    | 210    | 217    | 225    | 229    | 233    | 235    | 236    |
| 607    | 633    | 658    | 687    | 715    | 743    | 772    | 800    | 827    |
| 1,540  | 1,505  | 1,511  | 1,533  | 1,571  | 1,622  | 1,690  | 1,760  | 1,837  |
| 2,354  | 2,595  | 2,766  | 2,917  | 3,068  | 3,201  | 3,145  | 3,170  | 3,231  |
| 2,263  | 2,346  | 2,464  | 2,586  | 2,690  | 2,828  | 3,158  | 3,383  | 3,568  |
| 904    | 950    | 1,002  | 1,050  | 1,098  | 1,132  | 1,182  | 1,255  | 1,328  |
| 163    | 173    | 181    | 193    | 207    | 223    | 238    | 254    | 271    |
| 0      | 0      | 0      | 0      | 0      | 0      | 0      | 0      | 0      |
| 0      | 0      | 0      | 0      | 0      | 0      | 0      | 0      | 0      |
| 0      | 0      | 0      | 0      | 0      | 0      | 0      | 0      | 0      |
| 0      | 0      | 0      | 0      | 0      | 0      | 0      | 0      | 0      |
| 0      | 0      | 0      | 0      | 0      | 0      | 0      | 0      | 0      |
| 0      | 0      | 0      | 0      | 0      | 0      | 0      | 0      | 0      |
| 0      | 0      | 0      | 0      | 0      | 0      | 0      | 0      | 0      |
| 0      | 0      | 0      | 0      | 0      | 0      | 0      | 0      | 0      |
| 0      | 0      | 0      | 0      | 0      | 0      | 0      | 0      | 0      |
| 0      | 0      | 0      | 0      | 0      | 0      | 0      | 0      | 0      |
| 1      | 1      | 1      | 1      | 1      | 1      | 1      | 1      | 1      |
| 6      | 6      | 6      | 6      | 7      | 7      | 7      | 7      | 8      |
| 10     | 10     | 9      | 9      | 9      | 8      | 8      | 8      | 8      |
| 30     | 30     | 30     | 29     | 28     | 28     | 27     | 26     | 25     |
| 176    | 182    | 188    | 193    | 199    | 202    | 205    | 206    | 207    |
| 567    | 592    | 616    | 642    | 671    | 699    | 727    | 755    | 780    |
| 1,118  | 1,098  | 1,104  | 1,123  | 1,152  | 1,194  | 1,249  | 1,302  | 1,359  |
| 1,478  | 1,665  | 1,803  | 1,914  | 2,027  | 2,115  | 2,092  | 2,118  | 2,168  |
| 1,008  | 1,063  | 1,131  | 1,216  | 1,287  | 1,385  | 1,581  | 1,722  | 1,834  |
| 358    | 384    | 417    | 449    | 478    | 499    | 532    | 576    | 629    |
| 55     | 63     | 70     | 77     | 87     | 95     | 107    | 121    | 133    |
| 12,920 | 13,585 | 14,253 | 14,929 | 15,602 | 16,294 | 17,035 | 17,780 | 18,528 |
| 21.24% | 22.14% | 23.02% | 23.89% | 24.75% | 25.62% | 26.55% | 27.48% | 28.40% |

|    |             |
|----|-------------|
| 1  |             |
| 2  |             |
| 3  |             |
| 4  | <b>2040</b> |
| 5  | 0           |
| 6  | 0           |
| 7  | 0           |
| 8  | 0           |
| 9  | 0           |
| 10 | 0           |
| 11 | 0           |
| 12 | 0           |
| 13 | 0           |
| 14 | 0           |
| 15 | 0           |
| 16 | 0           |
| 17 | 2           |
| 18 | 1           |
| 19 | 26          |
| 20 | 49          |
| 21 | 234         |
| 22 | 855         |
| 23 | 1,912       |
| 24 | 3,323       |
| 25 | 3,738       |
| 26 | 1,389       |
| 27 | 288         |
| 28 |             |
| 29 |             |
| 30 |             |
| 31 |             |
| 32 | 0           |
| 33 | 0           |
| 34 | 0           |
| 35 | 0           |
| 36 | 0           |
| 37 | 0           |
| 38 | 0           |
| 39 | 0           |
| 40 | 0           |
| 41 | 0           |
| 42 | 0           |
| 43 | 0           |
| 44 | 1           |
| 45 | 8           |
| 46 | 8           |
| 47 | 24          |
| 48 | 205         |
| 49 | 807         |
| 50 | 1,422       |
| 51 | 2,235       |
| 52 | 1,940       |
| 53 | 670         |
| 54 | 146         |
| 55 |             |
| 56 |             |
| 57 |             |
| 58 | 19,284      |
| 59 | 29.33%      |
| 60 |             |

For peer review only

| Group                               | Baseline |        |        |        |       |       |
|-------------------------------------|----------|--------|--------|--------|-------|-------|
|                                     | 2007     | 2008   | 2009   | 2010   | 2011  | 2012  |
| Females 0 - 4                       | 0        | 0      | 0      | 0      | 1     | 1     |
| Females 5 - 9                       | 0        | 2      | 0      | 0      | 0     | 0     |
| Females 10 - 14                     | 1        | 1      | 0      | 0      | 1     | 0     |
| Females 15 - 19                     | 1        | 2      | 0      | 2      | 1     | 1     |
| Females 20 - 24                     | 1        | 1      | 0      | 0      | 1     | 0     |
| Females 25 - 29                     | 2        | 1      | 2      | 1      | 2     | 3     |
| Females 30 - 34                     | 5        | 9      | 1      | 6      | 3     | 2     |
| Females 35 - 39                     | 13       | 10     | 12     | 6      | 9     | 6     |
| Females 40 - 44                     | 27       | 19     | 20     | 14     | 11    | 16    |
| Females 45 - 49                     | 32       | 33     | 35     | 36     | 22    | 42    |
| Females 50 - 54                     | 44       | 37     | 44     | 47     | 57    | 49    |
| Females 55 - 59                     | 52       | 53     | 57     | 54     | 53    | 53    |
| Females 60 - 64                     | 102      | 114    | 89     | 102    | 76    | 80    |
| Females 65 - 69                     | 134      | 141    | 123    | 112    | 124   | 123   |
| Females 70 - 74                     | 237      | 234    | 247    | 217    | 206   | 231   |
| Females 75 - 79                     | 446      | 463    | 394    | 383    | 395   | 375   |
| Females 80 - 84                     | 732      | 728    | 678    | 667    | 617   | 583   |
| Females 85 - 89                     | 870      | 895    | 815    | 815    | 775   | 730   |
| Females 90 - 94                     | 619      | 578    | 550    | 514    | 544   | 589   |
| Females 95 - 99                     | 260      | 251    | 244    | 242    | 234   | 246   |
| Females 100+                        | 31       | 37     | 54     | 37     | 48    | 37    |
| Males 0 - 4                         | 0        | 2      | 1      | 0      | 0     | 0     |
| Males 5 - 9                         | 0        | 0      | 0      | 0      | 0     | 0     |
| Males 10 - 14                       | 1        | 0      | 0      | 0      | 0     | 0     |
| Males 15 - 19                       | 1        | 1      | 1      | 2      | 0     | 0     |
| Males 20 - 24                       | 2        | 0      | 1      | 4      | 2     | 0     |
| Males 25 - 29                       | 1        | 4      | 2      | 3      | 2     | 1     |
| Males 30 - 34                       | 8        | 7      | 3      | 4      | 6     | 7     |
| Males 35 - 39                       | 10       | 15     | 15     | 9      | 9     | 10    |
| Males 40 - 44                       | 24       | 25     | 31     | 26     | 23    | 11    |
| Males 45 - 49                       | 50       | 43     | 27     | 37     | 30    | 31    |
| Males 50 - 54                       | 61       | 66     | 57     | 42     | 44    | 44    |
| Males 55 - 59                       | 67       | 65     | 64     | 66     | 68    | 80    |
| Males 60 - 64                       | 110      | 126    | 107    | 110    | 115   | 85    |
| Males 65 - 69                       | 156      | 182    | 152    | 151    | 169   | 142   |
| Males 70 - 74                       | 280      | 289    | 277    | 227    | 249   | 220   |
| Males 75 - 79                       | 418      | 390    | 377    | 409    | 338   | 354   |
| Males 80 - 84                       | 485      | 491    | 458    | 499    | 469   | 459   |
| Males 85 - 89                       | 435      | 430    | 436    | 412    | 379   | 382   |
| Males 90 - 94                       | 207      | 181    | 174    | 176    | 215   | 207   |
| Males 95 - 99                       | 49       | 55     | 45     | 69     | 42    | 51    |
| Males 100+                          | 2        | 8      | 6      | 4      | 6     | 5     |
| <b>Other Palliative Care Deaths</b> | 5,976    | 5,989  | 5,599  | 5,505  | 5,346 | 5,256 |
| <b>Percentage of All Deaths</b>     | 10.67%   | 10.75% | 10.40% | 10.20% | 9.96% | 9.57% |

1  
2  
3  
4  
5  
6  
7  
8  
9  
10  
11  
12  
13  
14  
15  
16  
17  
18  
19  
20  
21  
22  
23  
24  
25  
26  
27  
28  
29  
30  
31  
32  
33  
34  
35  
36  
37  
38  
39  
40  
41  
42  
43  
44  
45  
46  
47  
48  
49  
50  
51  
52  
53  
54  
55  
56  
57  
58  
59  
60

|  | 2013  | 2014  | 2015  | 2016  | 2017  | 2018  | 2019  | 2020  | 2021  |
|--|-------|-------|-------|-------|-------|-------|-------|-------|-------|
|  | 0     | 0     | 0     | 0     | 0     | 0     | 0     | 0     | 0     |
|  | 0     | 0     | 0     | 0     | 0     | 0     | 0     | 0     | 0     |
|  | 0     | 0     | 0     | 0     | 0     | 0     | 0     | 0     | 0     |
|  | 0     | 0     | 1     | 1     | 0     | 0     | 0     | 0     | 0     |
|  | 0     | 2     | 1     | 1     | 1     | 1     | 1     | 1     | 1     |
|  | 3     | 1     | 1     | 1     | 1     | 1     | 1     | 1     | 1     |
|  | 4     | 6     | 1     | 4     | 2     | 2     | 2     | 1     | 1     |
|  | 5     | 8     | 12    | 5     | 9     | 7     | 7     | 6     | 6     |
|  | 18    | 9     | 13    | 21    | 16    | 13    | 12    | 11    | 11    |
|  | 23    | 26    | 32    | 30    | 26    | 26    | 25    | 24    | 22    |
|  | 45    | 50    | 42    | 40    | 39    | 37    | 35    | 33    | 32    |
|  | 59    | 56    | 53    | 58    | 59    | 59    | 59    | 60    | 60    |
|  | 94    | 77    | 84    | 99    | 85    | 81    | 80    | 80    | 80    |
|  | 126   | 130   | 146   | 127   | 115   | 110   | 106   | 103   | 102   |
|  | 240   | 181   | 201   | 203   | 187   | 194   | 192   | 191   | 189   |
|  | 388   | 343   | 351   | 340   | 319   | 297   | 287   | 276   | 269   |
|  | 575   | 547   | 570   | 532   | 503   | 486   | 468   | 448   | 424   |
|  | 714   | 663   | 618   | 640   | 653   | 610   | 586   | 561   | 535   |
|  | 540   | 545   | 596   | 497   | 510   | 457   | 440   | 424   | 407   |
|  | 211   | 193   | 215   | 204   | 203   | 180   | 173   | 161   | 152   |
|  | 33    | 45    | 38    | 39    | 33    | 29    | 28    | 32    | 34    |
|  | 0     | 0     | 0     | 0     | 0     | 0     | 0     | 0     | 0     |
|  | 0     | 0     | 1     | 1     | 0     | 0     | 0     | 0     | 0     |
|  | 2     | 0     | 0     | 0     | 1     | 1     | 1     | 1     | 1     |
|  | 0     | 0     | 0     | 0     | 1     | 1     | 1     | 1     | 1     |
|  | 0     | 1     | 1     | 0     | 0     | 0     | 0     | 0     | 0     |
|  | 2     | 0     | 2     | 5     | 2     | 2     | 2     | 2     | 2     |
|  | 6     | 0     | 8     | 3     | 6     | 5     | 5     | 5     | 5     |
|  | 10    | 9     | 9     | 6     | 11    | 10    | 10    | 11    | 11    |
|  | 13    | 20    | 18    | 17    | 20    | 18    | 18    | 18    | 18    |
|  | 35    | 17    | 24    | 37    | 30    | 22    | 20    | 17    | 14    |
|  | 44    | 49    | 51    | 49    | 50    | 44    | 42    | 40    | 38    |
|  | 67    | 72    | 63    | 86    | 68    | 69    | 70    | 70    | 70    |
|  | 92    | 94    | 102   | 97    | 111   | 109   | 110   | 112   | 114   |
|  | 155   | 139   | 179   | 158   | 148   | 141   | 136   | 132   | 130   |
|  | 230   | 211   | 231   | 237   | 242   | 254   | 254   | 256   | 254   |
|  | 370   | 334   | 358   | 310   | 359   | 334   | 334   | 331   | 334   |
|  | 470   | 428   | 464   | 471   | 418   | 396   | 389   | 380   | 367   |
|  | 408   | 390   | 411   | 404   | 373   | 349   | 337   | 325   | 311   |
|  | 231   | 211   | 246   | 229   | 236   | 214   | 211   | 208   | 207   |
|  | 49    | 56    | 57    | 67    | 63    | 56    | 59    | 59    | 60    |
|  | 8     | 7     | 6     | 7     | 9     | 6     | 6     | 8     | 10    |
|  | 5,270 | 4,920 | 5,206 | 5,026 | 4,909 | 4,621 | 4,507 | 4,390 | 4,270 |
|  | 9.63% | 9.07% | 9.04% | 8.86% | 8.48% | 8.23% | 7.99% | 7.75% | 7.51% |

1  
2  
3  
4  
5  
6  
7  
8  
9  
10  
11  
12  
13  
14  
15  
16  
17  
18  
19  
20  
21  
22  
23  
24  
25  
26  
27  
28  
29  
30  
31  
32  
33  
34  
35  
36  
37  
38  
39  
40  
41  
42  
43  
44  
45  
46  
47  
48  
49  
50  
51  
52  
53  
54  
55  
56  
57  
58  
59  
60

| Projected |       |       |       |       |       |       |       |       |   |
|-----------|-------|-------|-------|-------|-------|-------|-------|-------|---|
| 2022      | 2023  | 2024  | 2025  | 2026  | 2027  | 2028  | 2029  | 2030  |   |
| 0         | 0     | 0     | 0     | 0     | 0     | 0     | 0     | 0     | 0 |
| 0         | 0     | 0     | 0     | 0     | 0     | 0     | 0     | 0     | 0 |
| 0         | 0     | 0     | 0     | 0     | 0     | 0     | 0     | 0     | 0 |
| 0         | 0     | 0     | 0     | 0     | 0     | 0     | 0     | 0     | 0 |
| 1         | 1     | 1     | 1     | 1     | 1     | 1     | 1     | 1     | 1 |
| 1         | 1     | 0     | 0     | 0     | 0     | 0     | 0     | 0     | 0 |
| 1         | 0     | 0     | 0     | 0     | 0     | 0     | 0     | 0     | 0 |
| 5         | 5     | 5     | 4     | 4     | 4     | 3     | 3     | 2     |   |
| 10        | 10    | 9     | 8     | 7     | 7     | 6     | 5     | 4     |   |
| 21        | 20    | 20    | 20    | 20    | 20    | 21    | 20    | 20    |   |
| 30        | 28    | 26    | 24    | 23    | 21    | 19    | 19    | 18    |   |
| 60        | 59    | 58    | 57    | 56    | 55    | 53    | 50    | 49    |   |
| 79        | 79    | 78    | 78    | 76    | 75    | 73    | 70    | 67    |   |
| 101       | 100   | 100   | 100   | 100   | 100   | 99    | 98    | 98    |   |
| 174       | 164   | 157   | 152   | 148   | 145   | 142   | 140   | 137   |   |
| 273       | 268   | 261   | 254   | 246   | 221   | 203   | 189   | 177   |   |
| 404       | 387   | 371   | 353   | 340   | 341   | 331   | 317   | 302   |   |
| 508       | 485   | 460   | 433   | 402   | 374   | 349   | 325   | 298   |   |
| 393       | 374   | 355   | 336   | 317   | 297   | 278   | 258   | 236   |   |
| 142       | 132   | 123   | 114   | 106   | 97    | 87    | 77    | 67    |   |
| 35        | 35    | 36    | 36    | 37    | 37    | 38    | 39    | 40    |   |
| 0         | 0     | 0     | 0     | 0     | 0     | 0     | 0     | 0     |   |
| 0         | 0     | 0     | 0     | 0     | 0     | 0     | 0     | 0     |   |
| 1         | 1     | 1     | 1     | 1     | 1     | 1     | 1     | 1     |   |
| 1         | 1     | 1     | 1     | 1     | 1     | 1     | 1     | 1     |   |
| 0         | 0     | 0     | 0     | 0     | 0     | 0     | 0     | 0     |   |
| 2         | 2     | 2     | 2     | 2     | 2     | 2     | 2     | 2     |   |
| 4         | 4     | 4     | 4     | 4     | 4     | 3     | 3     | 3     |   |
| 11        | 11    | 11    | 12    | 12    | 12    | 12    | 12    | 12    |   |
| 19        | 19    | 19    | 19    | 19    | 19    | 19    | 20    | 20    |   |
| 12        | 10    | 8     | 7     | 5     | 4     | 2     | 0     | 0     |   |
| 36        | 33    | 31    | 29    | 27    | 25    | 24    | 23    | 22    |   |
| 69        | 68    | 67    | 65    | 64    | 62    | 60    | 58    | 56    |   |
| 116       | 117   | 118   | 120   | 120   | 119   | 118   | 117   | 114   |   |
| 129       | 128   | 127   | 128   | 128   | 127   | 127   | 125   | 125   |   |
| 236       | 225   | 217   | 211   | 208   | 207   | 205   | 204   | 204   |   |
| 353       | 359   | 360   | 363   | 360   | 336   | 320   | 310   | 302   |   |
| 358       | 351   | 347   | 340   | 341   | 356   | 358   | 355   | 352   |   |
| 295       | 281   | 266   | 248   | 227   | 208   | 190   | 174   | 155   |   |
| 207       | 205   | 202   | 199   | 195   | 189   | 186   | 180   | 173   |   |
| 59        | 58    | 58    | 58    | 58    | 59    | 59    | 58    | 58    |   |
| 11        | 12    | 13    | 14    | 16    | 17    | 18    | 20    | 22    |   |
| 4,155     | 4,035 | 3,914 | 3,791 | 3,669 | 3,541 | 3,409 | 3,274 | 3,138 |   |
| 7.27%     | 7.03% | 6.78% | 6.52% | 6.27% | 6.01% | 5.74% | 5.47% | 5.20% |   |

1  
2  
3  
4  
5  
6  
7  
8  
9  
10  
11  
12  
13  
14  
15  
16  
17  
18  
19  
20  
21  
22  
23  
24  
25  
26  
27  
28  
29  
30  
31  
32  
33  
34  
35  
36  
37  
38  
39  
40  
41  
42  
43  
44  
45  
46  
47  
48  
49  
50  
51  
52  
53  
54  
55  
56  
57  
58  
59  
60

|  | 2031  | 2032  | 2033  | 2034  | 2035  | 2036  | 2037  | 2038  | 2039  |
|--|-------|-------|-------|-------|-------|-------|-------|-------|-------|
|  | 0     | 0     | 0     | 0     | 0     | 0     | 0     | 0     | 0     |
|  | 0     | 0     | 0     | 0     | 0     | 0     | 0     | 0     | 0     |
|  | 0     | 0     | 0     | 0     | 0     | 0     | 0     | 0     | 0     |
|  | 0     | 0     | 0     | 0     | 0     | 0     | 0     | 0     | 0     |
|  | 1     | 1     | 1     | 1     | 1     | 1     | 1     | 1     | 1     |
|  | 0     | 0     | 0     | 0     | 0     | 0     | 0     | 0     | 0     |
|  | 0     | 0     | 0     | 0     | 0     | 0     | 0     | 0     | 0     |
|  | 2     | 2     | 1     | 1     | 0     | 0     | 0     | 0     | 0     |
|  | 4     | 3     | 2     | 2     | 1     | 0     | 0     | 0     | 0     |
|  | 20    | 20    | 20    | 20    | 20    | 20    | 20    | 20    | 20    |
|  | 18    | 18    | 17    | 17    | 16    | 16    | 15    | 14    | 14    |
|  | 46    | 44    | 43    | 42    | 43    | 43    | 45    | 46    | 46    |
|  | 65    | 62    | 59    | 56    | 53    | 49    | 46    | 44    | 43    |
|  | 96    | 94    | 91    | 88    | 84    | 82    | 78    | 74    | 70    |
|  | 135   | 132   | 129   | 126   | 122   | 118   | 113   | 107   | 101   |
|  | 166   | 157   | 148   | 138   | 129   | 119   | 108   | 98    | 86    |
|  | 286   | 251   | 225   | 202   | 182   | 163   | 146   | 127   | 109   |
|  | 275   | 263   | 240   | 213   | 184   | 152   | 112   | 78    | 45    |
|  | 211   | 187   | 166   | 144   | 119   | 95    | 73    | 46    | 15    |
|  | 56    | 44    | 32    | 19    | 5     | 0     | 0     | 0     | 0     |
|  | 42    | 44    | 45    | 48    | 50    | 53    | 56    | 59    | 62    |
|  | 0     | 0     | 0     | 0     | 0     | 0     | 0     | 0     | 0     |
|  | 0     | 0     | 0     | 0     | 0     | 0     | 0     | 0     | 0     |
|  | 1     | 1     | 1     | 1     | 1     | 1     | 1     | 1     | 1     |
|  | 1     | 1     | 1     | 1     | 1     | 1     | 1     | 1     | 1     |
|  | 0     | 0     | 0     | 0     | 0     | 0     | 0     | 0     | 0     |
|  | 2     | 2     | 2     | 2     | 2     | 2     | 2     | 2     | 2     |
|  | 2     | 2     | 2     | 2     | 2     | 2     | 2     | 2     | 1     |
|  | 12    | 12    | 12    | 12    | 12    | 11    | 11    | 11    | 10    |
|  | 20    | 20    | 20    | 20    | 20    | 19    | 19    | 18    | 17    |
|  | 0     | 0     | 0     | 0     | 0     | 0     | 0     | 0     | 0     |
|  | 22    | 21    | 21    | 20    | 20    | 19    | 19    | 18    | 18    |
|  | 54    | 52    | 50    | 50    | 51    | 51    | 53    | 54    | 54    |
|  | 112   | 110   | 107   | 103   | 100   | 97    | 93    | 91    | 91    |
|  | 122   | 119   | 116   | 113   | 108   | 104   | 100   | 95    | 91    |
|  | 203   | 202   | 201   | 199   | 197   | 193   | 188   | 182   | 177   |
|  | 298   | 297   | 295   | 293   | 293   | 291   | 290   | 288   | 285   |
|  | 344   | 316   | 297   | 281   | 269   | 260   | 253   | 244   | 237   |
|  | 137   | 124   | 104   | 79    | 53    | 25    | 0     | 0     | 0     |
|  | 162   | 154   | 147   | 141   | 131   | 124   | 122   | 113   | 100   |
|  | 57    | 56    | 55    | 53    | 51    | 47    | 44    | 42    | 39    |
|  | 25    | 28    | 31    | 34    | 38    | 42    | 47    | 53    | 57    |
|  | 2,997 | 2,839 | 2,681 | 2,521 | 2,357 | 2,199 | 2,056 | 1,927 | 1,791 |
|  | 4.93% | 4.63% | 4.33% | 4.03% | 3.74% | 3.46% | 3.20% | 2.98% | 2.75% |



|    |             |
|----|-------------|
| 1  |             |
| 2  |             |
| 3  |             |
| 4  | <b>2040</b> |
| 5  | 0           |
| 6  | 0           |
| 7  | 0           |
| 8  | 0           |
| 9  | 0           |
| 10 | 1           |
| 11 | 0           |
| 12 | 0           |
| 13 | 0           |
| 14 | 0           |
| 15 | 0           |
| 16 | 19          |
| 17 | 13          |
| 18 | 46          |
| 19 | 42          |
| 20 | 66          |
| 21 | 94          |
| 22 | 75          |
| 23 | 89          |
| 24 | 12          |
| 25 | 0           |
| 26 | 0           |
| 27 | 64          |
| 28 |             |
| 29 |             |
| 30 |             |
| 31 |             |
| 32 | 0           |
| 33 | 0           |
| 34 | 1           |
| 35 | 1           |
| 36 | 0           |
| 37 | 2           |
| 38 | 1           |
| 39 | 10          |
| 40 | 17          |
| 41 | 0           |
| 42 | 17          |
| 43 | 55          |
| 44 | 92          |
| 45 | 86          |
| 46 | 169         |
| 47 | 282         |
| 48 | 229         |
| 49 | 0           |
| 50 | 85          |
| 51 | 35          |
| 52 | 62          |
| 53 |             |
| 54 |             |
| 55 |             |
| 56 |             |
| 57 |             |
| 58 | 1,668       |
| 59 | 2.54%       |
| 60 |             |

For peer review only

1  
2  
3  
4  
5  
6  
7  
8  
9  
10  
11  
12  
13  
14  
15  
16  
17  
18  
19  
20  
21  
22  
23  
24  
25  
26  
27  
28  
29  
30  
31  
32  
33  
34  
35  
36  
37  
38  
39  
40  
41  
42  
43  
44  
45  
46  
47  
48  
49  
50  
51  
52  
53  
54  
55  
56  
57  
58  
59  
60

| Group                                       | 2007   | 2008   | 2009   | 2010   | 2011   |
|---------------------------------------------|--------|--------|--------|--------|--------|
| Females 0 - 4                               | 0      | 0      | 0      | 0      | 0      |
| Females 5 - 9                               | 1      | 1      | 0      | 1      | 0      |
| Females 10 - 14                             | 0      | 1      | 1      | 0      | 0      |
| Females 15 - 19                             | 1      | 1      | 1      | 2      | 1      |
| Females 20 - 24                             | 0      | 3      | 0      | 0      | 1      |
| Females 25 - 29                             | 1      | 0      | 2      | 0      | 0      |
| Females 30 - 34                             | 6      | 2      | 6      | 5      | 2      |
| Females 35 - 39                             | 6      | 5      | 4      | 4      | 6      |
| Females 40 - 44                             | 24     | 12     | 12     | 18     | 10     |
| Females 45 - 49                             | 37     | 26     | 30     | 38     | 37     |
| Females 50 - 54                             | 55     | 46     | 46     | 60     | 61     |
| Females 55 - 59                             | 105    | 103    | 103    | 101    | 112    |
| Females 60 - 64                             | 194    | 194    | 184    | 206    | 186    |
| Females 65 - 69                             | 340    | 305    | 297    | 322    | 310    |
| Females 70 - 74                             | 518    | 519    | 466    | 566    | 503    |
| Females 75 - 79                             | 813    | 934    | 818    | 863    | 785    |
| Females 80 - 84                             | 1,363  | 1,294  | 1,284  | 1,362  | 1,270  |
| Females 85 - 89                             | 1,410  | 1,551  | 1,588  | 1,541  | 1,458  |
| Females 90 - 94                             | 1,017  | 955    | 936    | 1,055  | 1,019  |
| Females 95 - 99                             | 425    | 409    | 392    | 410    | 430    |
| Females 100+                                | 67     | 73     | 64     | 73     | 89     |
| Males 0 - 4                                 | 0      | 0      | 0      | 0      | 1      |
| Males 5 - 9                                 | 0      | 0      | 0      | 0      | 0      |
| Males 10 - 14                               | 1      | 1      | 0      | 0      | 2      |
| Males 15 - 19                               | 2      | 1      | 1      | 0      | 0      |
| Males 20 - 24                               | 3      | 1      | 1      | 0      | 1      |
| Males 25 - 29                               | 1      | 2      | 0      | 0      | 1      |
| Males 30 - 34                               | 2      | 4      | 0      | 7      | 5      |
| Males 35 - 39                               | 14     | 8      | 4      | 10     | 3      |
| Males 40 - 44                               | 9      | 12     | 18     | 19     | 18     |
| Males 45 - 49                               | 35     | 41     | 31     | 31     | 31     |
| Males 50 - 54                               | 68     | 72     | 73     | 69     | 63     |
| Males 55 - 59                               | 151    | 147    | 154    | 128    | 114    |
| Males 60 - 64                               | 282    | 263    | 264    | 287    | 259    |
| Males 65 - 69                               | 467    | 497    | 438    | 448    | 464    |
| Males 70 - 74                               | 732    | 686    | 739    | 678    | 733    |
| Males 75 - 79                               | 1,053  | 931    | 1,002  | 1,003  | 956    |
| Males 80 - 84                               | 1,130  | 1,142  | 1,108  | 1,209  | 1,186  |
| Males 85 - 89                               | 870    | 875    | 1,009  | 932    | 1,014  |
| Males 90 - 94                               | 411    | 368    | 348    | 424    | 458    |
| Males 95 - 99                               | 92     | 111    | 109    | 135    | 118    |
| Males 100+                                  | 10     | 14     | 10     | 12     | 10     |
| <b>Deaths with More Than 1 Condition</b>    | 11,716 | 11,610 | 11,543 | 12,019 | 11,717 |
| <b>Percentage of All Deaths</b>             | 20.93% | 20.84% | 21.43% | 22.27% | 21.84% |
| <b>Percentage of Palliative Care Deaths</b> | 23.68% | 23.65% | 24.20% | 25.05% | 24.67% |

1  
2 **(underlying and contributory causes)**  
3  
4  
5  
6  
7  
8  
9  
10  
11  
12  
13  
14  
15  
16  
17  
18  
19  
20  
21  
22  
23  
24  
25  
26  
27  
28  
29  
30  
31  
32  
33  
34  
35  
36  
37  
38  
39  
40  
41  
42  
43  
44  
45  
46  
47  
48  
49  
50  
51  
52  
53  
54  
55  
56  
57  
58  
59  
60

For peer review only

1  
2  
3  
4  
5  
6  
7  
8  
9  
10  
11  
12  
13  
14  
15  
16  
17  
18  
19  
20  
21  
22  
23  
24  
25  
26  
27  
28  
29  
30  
31  
32  
33  
34  
35  
36  
37  
38  
39  
40  
41  
42  
43  
44  
45  
46  
47  
48  
49  
50  
51  
52  
53  
54  
55  
56  
57  
58  
59  
60

For peer review only

1  
2  
3  
4  
5  
6  
7  
8  
9  
10  
11  
12  
13  
14  
15  
16  
17  
18  
19  
20  
21  
22  
23  
24  
25  
26  
27  
28  
29  
30  
31  
32  
33  
34  
35  
36  
37  
38  
39  
40  
41  
42  
43  
44  
45  
46  
47  
48  
49  
50  
51  
52  
53  
54  
55  
56  
57  
58  
59  
60

| Baseline |        |        |        |        |        |        |        |        |  |  |
|----------|--------|--------|--------|--------|--------|--------|--------|--------|--|--|
| 2012     | 2013   | 2014   | 2015   | 2016   | 2017   | 2018   | 2019   | 2020   |  |  |
| 1        | 1      | 0      | 0      | 0      | 1      | 1      | 1      | 1      |  |  |
| 1        | 0      | 0      | 0      | 0      | 0      | 0      | 0      | 0      |  |  |
| 0        | 1      | 0      | 0      | 1      | 1      | 1      | 1      | 1      |  |  |
| 0        | 2      | 0      | 1      | 1      | 0      | 0      | 0      | 0      |  |  |
| 0        | 0      | 1      | 0      | 2      | 0      | 0      | 0      | 0      |  |  |
| 1        | 4      | 2      | 2      | 2      | 2      | 3      | 3      | 3      |  |  |
| 0        | 1      | 2      | 4      | 2      | 5      | 6      | 6      | 6      |  |  |
| 6        | 9      | 3      | 8      | 8      | 8      | 7      | 7      | 7      |  |  |
| 13       | 10     | 10     | 13     | 20     | 13     | 10     | 9      | 9      |  |  |
| 32       | 23     | 26     | 35     | 33     | 35     | 36     | 34     | 33     |  |  |
| 67       | 54     | 61     | 70     | 73     | 75     | 74     | 74     | 73     |  |  |
| 94       | 109    | 116    | 110    | 120    | 133    | 134    | 136    | 139    |  |  |
| 197      | 198    | 176    | 220    | 212    | 222    | 217    | 223    | 228    |  |  |
| 301      | 318    | 326    | 403    | 377    | 377    | 369    | 365    | 365    |  |  |
| 551      | 549    | 535    | 635    | 639    | 626    | 677    | 701    | 727    |  |  |
| 917      | 919    | 894    | 999    | 1,051  | 1,038  | 1,025  | 1,053  | 1,076  |  |  |
| 1,290    | 1,348  | 1,297  | 1,506  | 1,469  | 1,551  | 1,583  | 1,611  | 1,634  |  |  |
| 1,540    | 1,528  | 1,615  | 1,837  | 1,894  | 2,035  | 2,038  | 2,100  | 2,160  |  |  |
| 1,177    | 1,159  | 1,250  | 1,547  | 1,412  | 1,567  | 1,502  | 1,550  | 1,605  |  |  |
| 441      | 411    | 412    | 572    | 570    | 623    | 594    | 619    | 623    |  |  |
| 75       | 70     | 97     | 98     | 88     | 84     | 75     | 73     | 86     |  |  |
| 1        | 0      | 0      | 0      | 1      | 0      | 0      | 0      | 0      |  |  |
| 0        | 0      | 0      | 0      | 0      | 0      | 0      | 0      | 0      |  |  |
| 0        | 1      | 0      | 1      | 0      | 0      | 0      | 0      | 0      |  |  |
| 0        | 1      | 1      | 4      | 0      | 1      | 1      | 1      | 1      |  |  |
| 0        | 1      | 0      | 0      | 0      | 0      | 0      | 0      | 0      |  |  |
| 0        | 1      | 1      | 1      | 4      | 4      | 4      | 4      | 4      |  |  |
| 6        | 2      | 2      | 4      | 3      | 3      | 3      | 3      | 3      |  |  |
| 6        | 5      | 6      | 10     | 4      | 12     | 11     | 11     | 11     |  |  |
| 9        | 8      | 12     | 18     | 13     | 13     | 12     | 13     | 13     |  |  |
| 30       | 31     | 23     | 31     | 44     | 40     | 33     | 31     | 30     |  |  |
| 65       | 64     | 50     | 87     | 93     | 91     | 84     | 84     | 83     |  |  |
| 142      | 146    | 132    | 159    | 184    | 153    | 156    | 157    | 158    |  |  |
| 279      | 249    | 281    | 309    | 354    | 313    | 310    | 316    | 324    |  |  |
| 459      | 483    | 481    | 627    | 595    | 534    | 519    | 509    | 504    |  |  |
| 688      | 724    | 716    | 864    | 839    | 921    | 1,002  | 1,037  | 1,078  |  |  |
| 979      | 1,005  | 1,031  | 1,138  | 1,152  | 1,225  | 1,175  | 1,208  | 1,233  |  |  |
| 1,193    | 1,193  | 1,282  | 1,500  | 1,518  | 1,595  | 1,585  | 1,637  | 1,678  |  |  |
| 1,036    | 1,078  | 1,170  | 1,287  | 1,305  | 1,390  | 1,397  | 1,450  | 1,511  |  |  |
| 555      | 563    | 599    | 752    | 744    | 799    | 766    | 801    | 837    |  |  |
| 109      | 111    | 125    | 170    | 180    | 206    | 195    | 217    | 231    |  |  |
| 11       | 13     | 17     | 16     | 17     | 29     | 19     | 19     | 23     |  |  |
| 12,272   | 12,393 | 12,752 | 15,038 | 15,024 | 15,725 | 15,623 | 16,061 | 16,497 |  |  |
| 22.34%   | 22.66% | 23.51% | 26.12% | 26.49% | 27.17% | 27.82% | 28.48% | 29.13% |  |  |
| 25.14%   | 25.43% | 26.34% | 29.14% | 29.59% | 30.15% | 30.76% | 31.43% | 32.07% |  |  |

1  
2  
3  
4  
5  
6  
7  
8  
9  
10  
11  
12  
13  
14  
15  
16  
17  
18  
19  
20  
21  
22  
23  
24  
25  
26  
27  
28  
29  
30  
31  
32  
33  
34  
35  
36  
37  
38  
39  
40  
41  
42  
43  
44  
45  
46  
47  
48  
49  
50  
51  
52  
53  
54  
55  
56  
57  
58  
59  
60

For peer review only

1  
2  
3  
4  
5  
6  
7  
8  
9  
10  
11  
12  
13  
14  
15  
16  
17  
18  
19  
20  
21  
22  
23  
24  
25  
26  
27  
28  
29  
30  
31  
32  
33  
34  
35  
36  
37  
38  
39  
40  
41  
42  
43  
44  
45  
46  
47  
48  
49  
50  
51  
52  
53  
54  
55  
56  
57  
58  
59  
60

For peer review only

1  
2  
3  
4  
5  
6  
7  
8  
9  
10  
11  
12  
13  
14  
15  
16  
17  
18  
19  
20  
21  
22  
23  
24  
25  
26  
27  
28  
29  
30  
31  
32  
33  
34  
35  
36  
37  
38  
39  
40  
41  
42  
43  
44  
45  
46  
47  
48  
49  
50  
51  
52  
53  
54  
55  
56  
57  
58  
59  
60

Projected

| 2021   | 2022   | 2023   | 2024   | 2025   | 2026   | 2027   | 2028   | 2029   |
|--------|--------|--------|--------|--------|--------|--------|--------|--------|
| 1      | 2      | 2      | 2      | 2      | 2      | 2      | 2      | 2      |
| 0      | 0      | 0      | 0      | 0      | 0      | 0      | 0      | 0      |
| 1      | 1      | 1      | 1      | 1      | 1      | 1      | 1      | 1      |
| 0      | 0      | 0      | 0      | 0      | 0      | 0      | 0      | 0      |
| 0      | 0      | 0      | 0      | 0      | 0      | 0      | 0      | 0      |
| 3      | 3      | 3      | 3      | 3      | 3      | 3      | 3      | 3      |
| 6      | 5      | 5      | 5      | 5      | 5      | 5      | 5      | 4      |
| 7      | 7      | 7      | 8      | 8      | 8      | 8      | 8      | 8      |
| 8      | 7      | 7      | 6      | 5      | 5      | 4      | 3      | 2      |
| 32     | 30     | 29     | 30     | 30     | 30     | 31     | 32     | 33     |
| 73     | 72     | 70     | 68     | 66     | 64     | 61     | 60     | 60     |
| 140    | 141    | 140    | 139    | 137    | 136    | 134    | 130    | 126    |
| 234    | 240    | 245    | 250    | 256    | 258    | 260    | 259    | 258    |
| 368    | 375    | 382    | 390    | 401    | 411    | 419    | 427    | 434    |
| 749    | 720    | 710    | 709    | 715    | 727    | 746    | 765    | 787    |
| 1,116  | 1,206  | 1,263  | 1,313  | 1,367  | 1,414  | 1,365  | 1,353  | 1,356  |
| 1,640  | 1,658  | 1,691  | 1,728  | 1,758  | 1,813  | 1,953  | 2,041  | 2,114  |
| 2,218  | 2,273  | 2,349  | 2,415  | 2,474  | 2,507  | 2,559  | 2,640  | 2,725  |
| 1,661  | 1,730  | 1,783  | 1,838  | 1,895  | 1,958  | 2,019  | 2,095  | 2,163  |
| 639    | 650    | 664    | 685    | 709    | 738    | 772    | 796    | 826    |
| 92     | 97     | 98     | 101    | 103    | 108    | 109    | 112    | 117    |
| 0      | 0      | 0      | 0      | 0      | 0      | 0      | 0      | 0      |
| 0      | 0      | 0      | 0      | 0      | 0      | 0      | 0      | 0      |
| 0      | 0      | 0      | 0      | 0      | 0      | 0      | 0      | 0      |
| 1      | 1      | 1      | 1      | 1      | 1      | 1      | 1      | 1      |
| 0      | 0      | 0      | 0      | 0      | 0      | 0      | 0      | 0      |
| 4      | 4      | 4      | 4      | 4      | 4      | 4      | 4      | 4      |
| 3      | 3      | 3      | 3      | 3      | 3      | 3      | 3      | 3      |
| 11     | 11     | 11     | 11     | 11     | 11     | 11     | 11     | 10     |
| 14     | 15     | 15     | 16     | 17     | 17     | 18     | 18     | 19     |
| 29     | 28     | 27     | 27     | 27     | 27     | 28     | 28     | 28     |
| 82     | 81     | 80     | 78     | 76     | 74     | 72     | 70     | 71     |
| 157    | 155    | 153    | 151    | 146    | 144    | 140    | 135    | 130    |
| 331    | 338    | 345    | 350    | 356    | 358    | 358    | 357    | 354    |
| 504    | 510    | 515    | 522    | 533    | 543    | 551    | 558    | 563    |
| 1,107  | 1,063  | 1,047  | 1,043  | 1,049  | 1,068  | 1,096  | 1,122  | 1,152  |
| 1,284  | 1,394  | 1,464  | 1,511  | 1,566  | 1,602  | 1,538  | 1,512  | 1,506  |
| 1,701  | 1,745  | 1,794  | 1,866  | 1,924  | 2,025  | 2,226  | 2,362  | 2,464  |
| 1,563  | 1,609  | 1,676  | 1,737  | 1,785  | 1,813  | 1,864  | 1,929  | 2,019  |
| 883    | 941    | 995    | 1,044  | 1,101  | 1,156  | 1,205  | 1,273  | 1,335  |
| 247    | 259    | 270    | 288    | 307    | 331    | 359    | 385    | 412    |
| 27     | 30     | 32     | 34     | 37     | 40     | 42     | 44     | 48     |
| 16,936 | 17,404 | 17,883 | 18,376 | 18,880 | 19,404 | 19,966 | 20,545 | 21,139 |
| 29.77% | 30.45% | 31.13% | 31.81% | 32.48% | 33.15% | 33.89% | 34.62% | 35.34% |
| 32.71% | 33.39% | 34.06% | 34.73% | 35.39% | 36.03% | 36.74% | 37.44% | 38.13% |



1  
2  
3  
4  
5  
6  
7  
8  
9  
10  
11  
12  
13  
14  
15  
16  
17  
18  
19  
20  
21  
22  
23  
24  
25  
26  
27  
28  
29  
30  
31  
32  
33  
34  
35  
36  
37  
38  
39  
40  
41  
42  
43  
44  
45  
46  
47  
48  
49  
50  
51  
52  
53  
54  
55  
56  
57  
58  
59  
60

For peer review only

1  
2  
3  
4  
5  
6  
7  
8  
9  
10  
11  
12  
13  
14  
15  
16  
17  
18  
19  
20  
21  
22  
23  
24  
25  
26  
27  
28  
29  
30  
31  
32  
33  
34  
35  
36  
37  
38  
39  
40  
41  
42  
43  
44  
45  
46  
47  
48  
49  
50  
51  
52  
53  
54  
55  
56  
57  
58  
59  
60

For peer review only

1  
2  
3  
4  
5  
6  
7  
8  
9  
10  
11  
12  
13  
14  
15  
16  
17  
18  
19  
20  
21  
22  
23  
24  
25  
26  
27  
28  
29  
30  
31  
32  
33  
34  
35  
36  
37  
38  
39  
40  
41  
42  
43  
44  
45  
46  
47  
48  
49  
50  
51  
52  
53  
54  
55  
56  
57  
58  
59  
60

|  | 2030   | 2031   | 2032   | 2033   | 2034   | 2035   | 2036   | 2037   | 2038   |
|--|--------|--------|--------|--------|--------|--------|--------|--------|--------|
|  | 2      | 2      | 2      | 2      | 2      | 2      | 2      | 2      | 2      |
|  | 0      | 0      | 0      | 0      | 0      | 0      | 0      | 0      | 0      |
|  | 1      | 1      | 1      | 1      | 1      | 1      | 1      | 1      | 1      |
|  | 0      | 0      | 0      | 0      | 0      | 0      | 0      | 0      | 0      |
|  | 0      | 0      | 0      | 0      | 0      | 0      | 0      | 0      | 0      |
|  | 3      | 3      | 3      | 3      | 4      | 4      | 4      | 4      | 4      |
|  | 4      | 4      | 3      | 3      | 3      | 3      | 3      | 3      | 3      |
|  | 8      | 8      | 8      | 8      | 8      | 8      | 8      | 7      | 7      |
|  | 2      | 1      | 0      | 0      | 0      | 0      | 0      | 0      | 0      |
|  | 33     | 33     | 33     | 33     | 34     | 34     | 35     | 35     | 35     |
|  | 61     | 62     | 65     | 67     | 68     | 69     | 70     | 70     | 71     |
|  | 122    | 117    | 112    | 109    | 109    | 110    | 113    | 117    | 120    |
|  | 254    | 253    | 249    | 243    | 234    | 228    | 218    | 209    | 205    |
|  | 443    | 446    | 447    | 445    | 441    | 433    | 429    | 423    | 411    |
|  | 809    | 831    | 853    | 875    | 894    | 916    | 926    | 933    | 934    |
|  | 1,374  | 1,402  | 1,445  | 1,489  | 1,539  | 1,587  | 1,637  | 1,686  | 1,734  |
|  | 2,193  | 2,258  | 2,177  | 2,155  | 2,158  | 2,183  | 2,227  | 2,293  | 2,361  |
|  | 2,797  | 2,907  | 3,173  | 3,348  | 3,497  | 3,646  | 3,772  | 3,675  | 3,675  |
|  | 2,226  | 2,263  | 2,323  | 2,416  | 2,512  | 2,590  | 2,700  | 2,991  | 3,179  |
|  | 860    | 899    | 939    | 982    | 1,023  | 1,063  | 1,088  | 1,129  | 1,191  |
|  | 123    | 131    | 138    | 144    | 153    | 163    | 175    | 186    | 198    |
|  | 0      | 0      | 0      | 0      | 0      | 0      | 0      | 0      | 0      |
|  | 0      | 0      | 0      | 0      | 0      | 0      | 0      | 0      | 0      |
|  | 0      | 0      | 0      | 0      | 0      | 0      | 0      | 0      | 0      |
|  | 1      | 1      | 1      | 1      | 1      | 1      | 1      | 1      | 1      |
|  | 0      | 0      | 0      | 0      | 0      | 0      | 0      | 0      | 0      |
|  | 4      | 4      | 4      | 5      | 5      | 5      | 5      | 5      | 5      |
|  | 3      | 3      | 3      | 3      | 3      | 3      | 3      | 3      | 3      |
|  | 10     | 10     | 10     | 9      | 9      | 9      | 8      | 8      | 7      |
|  | 20     | 21     | 21     | 22     | 22     | 22     | 22     | 22     | 22     |
|  | 28     | 28     | 28     | 29     | 29     | 29     | 30     | 30     | 30     |
|  | 72     | 73     | 76     | 78     | 80     | 81     | 82     | 83     | 85     |
|  | 126    | 121    | 116    | 113    | 113    | 114    | 115    | 118    | 121    |
|  | 348    | 344    | 338    | 331    | 321    | 313    | 303    | 294    | 287    |
|  | 569    | 569    | 566    | 560    | 553    | 539    | 532    | 519    | 504    |
|  | 1,186  | 1,218  | 1,250  | 1,282  | 1,309  | 1,338  | 1,350  | 1,358  | 1,357  |
|  | 1,513  | 1,537  | 1,577  | 1,614  | 1,656  | 1,704  | 1,747  | 1,792  | 1,837  |
|  | 2,579  | 2,664  | 2,584  | 2,569  | 2,584  | 2,621  | 2,689  | 2,785  | 2,877  |
|  | 2,090  | 2,204  | 2,443  | 2,606  | 2,726  | 2,848  | 2,933  | 2,865  | 2,865  |
|  | 1,388  | 1,423  | 1,480  | 1,554  | 1,650  | 1,725  | 1,835  | 2,072  | 2,233  |
|  | 443    | 473    | 504    | 543    | 580    | 613    | 635    | 673    | 723    |
|  | 52     | 57     | 63     | 68     | 74     | 81     | 87     | 95     | 105    |
|  | 21,746 | 22,371 | 23,034 | 23,710 | 24,395 | 25,084 | 25,785 | 26,487 | 27,196 |
|  | 36.06% | 36.78% | 37.54% | 38.29% | 39.04% | 39.79% | 40.55% | 41.29% | 42.03% |
|  | 38.81% | 39.49% | 40.21% | 40.91% | 41.60% | 42.29% | 42.98% | 43.63% | 44.29% |

1  
2  
3  
4  
5  
6  
7  
8  
9  
10  
11  
12  
13  
14  
15  
16  
17  
18  
19  
20  
21  
22  
23  
24  
25  
26  
27  
28  
29  
30  
31  
32  
33  
34  
35  
36  
37  
38  
39  
40  
41  
42  
43  
44  
45  
46  
47  
48  
49  
50  
51  
52  
53  
54  
55  
56  
57  
58  
59  
60

For peer review only

1  
2  
3  
4  
5  
6  
7  
8  
9  
10  
11  
12  
13  
14  
15  
16  
17  
18  
19  
20  
21  
22  
23  
24  
25  
26  
27  
28  
29  
30  
31  
32  
33  
34  
35  
36  
37  
38  
39  
40  
41  
42  
43  
44  
45  
46  
47  
48  
49  
50  
51  
52  
53  
54  
55  
56  
57  
58  
59  
60

For peer review only

|    | <b>2039</b> | <b>2040</b> |
|----|-------------|-------------|
| 1  |             |             |
| 2  |             |             |
| 3  |             |             |
| 4  | <b>2039</b> | <b>2040</b> |
| 5  | 2           | 2           |
| 6  | 0           | 0           |
| 7  | 0           | 0           |
| 8  | 2           | 1           |
| 9  | 0           | 0           |
| 10 | 0           | 0           |
| 11 | 4           | 4           |
| 12 | 3           | 3           |
| 13 | 7           | 7           |
| 14 | 0           | 0           |
| 15 | 0           | 0           |
| 16 | 35          | 35          |
| 17 | 73          | 74          |
| 18 | 122         | 124         |
| 19 | 205         | 208         |
| 20 | 396         | 384         |
| 21 | 930         | 918         |
| 22 | 1,778       | 1,826       |
| 23 | 2,437       | 2,511       |
| 24 | 3,717       | 3,796       |
| 25 | 3,327       | 3,460       |
| 26 | 1,254       | 1,304       |
| 27 | 210         | 223         |
| 28 |             |             |
| 29 |             |             |
| 30 |             |             |
| 31 |             |             |
| 32 | 0           | 0           |
| 33 | 0           | 0           |
| 34 | 0           | 0           |
| 35 | 1           | 1           |
| 36 | 0           | 0           |
| 37 | 5           | 5           |
| 38 | 3           | 3           |
| 39 | 7           | 7           |
| 40 | 22          | 22          |
| 41 | 30          | 29          |
| 42 | 87          | 89          |
| 43 | 122         | 123         |
| 44 | 288         | 293         |
| 45 | 488         | 473         |
| 46 | 1,354       | 1,333       |
| 47 | 1,873       | 1,912       |
| 48 | 2,976       | 3,087       |
| 49 | 2,898       | 2,955       |
| 50 | 2,354       | 2,466       |
| 51 | 784         | 831         |
| 52 | 113         | 121         |
| 53 |             |             |
| 54 |             |             |
| 55 |             |             |
| 56 |             |             |
| 57 |             |             |
| 58 | 27,907      | 28,629      |
| 59 | 42.78%      | 43.54%      |
| 60 | 44.95%      | 45.62%      |

For peer review only

1  
2  
3  
4  
5  
6  
7  
8  
9  
10  
11  
12  
13  
14  
15  
16  
17  
18  
19  
20  
21  
22  
23  
24  
25  
26  
27  
28  
29  
30  
31  
32  
33  
34  
35  
36  
37  
38  
39  
40  
41  
42  
43  
44  
45  
46  
47  
48  
49  
50  
51  
52  
53  
54  
55  
56  
57  
58  
59  
60

For peer review only

1  
2  
3  
4  
5  
6  
7  
8  
9  
10  
11  
12  
13  
14  
15  
16  
17  
18  
19  
20  
21  
22  
23  
24  
25  
26  
27  
28  
29  
30  
31  
32  
33  
34  
35  
36  
37  
38  
39  
40  
41  
42  
43  
44  
45  
46  
47  
48  
49  
50  
51  
52  
53  
54  
55  
56  
57  
58  
59  
60

For peer review only



## STROBE STATEMENT

|                              | Item No | Recommendation                                                                                                                                                                       | Page No                                                           |
|------------------------------|---------|--------------------------------------------------------------------------------------------------------------------------------------------------------------------------------------|-------------------------------------------------------------------|
| <b>Title and abstract</b>    | 1       | (a) Indicate the study's design with a commonly used term in the title or the abstract                                                                                               | P4                                                                |
|                              |         | (b) Provide in the abstract an informative and balanced summary of what was done and what was found                                                                                  | P4-5                                                              |
| <b>Introduction</b>          |         |                                                                                                                                                                                      |                                                                   |
| Background/rationale         | 2       | Explain the scientific background and rationale for the investigation being reported                                                                                                 | P7-8                                                              |
| Objectives                   | 3       | State specific objectives, including any prespecified hypotheses                                                                                                                     | P8                                                                |
| <b>Methods</b>               |         |                                                                                                                                                                                      |                                                                   |
| Study design                 | 4       | Present key elements of study design early in the paper                                                                                                                              | P8                                                                |
| Setting                      | 5       | Describe the setting, locations, and relevant dates, including periods of recruitment, exposure, follow-up, and data collection                                                      | P9 & P12                                                          |
| Participants                 | 6       | (a) Give the eligibility criteria, and the sources and methods of selection of participants. Describe methods of follow-up                                                           | P9                                                                |
|                              |         | (b) For matched studies, give matching criteria and number of exposed and unexposed                                                                                                  | NA                                                                |
| Variables                    | 7       | Clearly define all outcomes, exposures, predictors, potential confounders, and effect modifiers. Give diagnostic criteria, if applicable                                             | P10-12                                                            |
| Data sources/<br>measurement | 8*      | For each variable of interest, give sources of data and details of methods of assessment (measurement). Describe comparability of assessment methods if there is more than one group | P9 Datasources, and Supplementary file 2                          |
| Bias                         | 9       | Describe any efforts to address potential sources of bias                                                                                                                            | Use of a range of methods to estimate future palliative care need |
| Study size                   | 10      | Explain how the study size was arrived at                                                                                                                                            | National dataset – P9                                             |
| Quantitative variables       | 11      | Explain how quantitative variables were handled in the analyses. If applicable, describe which groupings were chosen and why                                                         | NA                                                                |
| Statistical methods          | 12      | (a) Describe all statistical methods, including those used to control for confounding                                                                                                | P10-11                                                            |

|                  |     |                                                                                                                                                                                                   |                                                                                                         |
|------------------|-----|---------------------------------------------------------------------------------------------------------------------------------------------------------------------------------------------------|---------------------------------------------------------------------------------------------------------|
|                  |     | (b) Describe any methods used to examine subgroups and interactions                                                                                                                               | NA                                                                                                      |
|                  |     | (c) Explain how missing data were addressed                                                                                                                                                       | NA                                                                                                      |
|                  |     | (d) If applicable, explain how loss to follow-up was addressed                                                                                                                                    | NA                                                                                                      |
|                  |     | (e) Describe any sensitivity analyses                                                                                                                                                             | Alternative models described                                                                            |
| <b>Results</b>   |     |                                                                                                                                                                                                   |                                                                                                         |
| Participants     | 13* | (a) Report numbers of individuals at each stage of study—eg numbers potentially eligible, examined for eligibility, confirmed eligible, included in the study, completing follow-up, and analysed | NA for quantitative analysis; P19 for and supplementary file 1 for participation in expert consultation |
|                  |     | (b) Give reasons for non-participation at each stage                                                                                                                                              | NA for quantitative analysis' not known for expert consultation/survey.                                 |
|                  |     | (c) Consider use of a flow diagram                                                                                                                                                                | NA                                                                                                      |
| Descriptive data | 14* | (a) Give characteristics of study participants (eg demographic, clinical, social) and information on exposures and potential confounders                                                          | For expert consultation see supplementary material 1                                                    |
|                  |     | (b) Indicate number of participants with missing data for each variable of interest                                                                                                               | NA                                                                                                      |
|                  |     | (c) Summarise follow-up time (eg, average and total amount)                                                                                                                                       | NA                                                                                                      |
| Outcome data     | 15* | Report numbers of outcome events or summary measures over time                                                                                                                                    | Estimates of palliative care need over time shown in results.                                           |
