# Supplementary material for: How many people will need palliative care in Scotland by 2040? A mixed-method study of projected palliative care need and recommendations for service delivery
Source: PubMed Central journal article supplement — BMJ Open. 2021 Feb 3;11(2):e041317. doi: 10.1136/bmjopen-2020-041317 (PMC7868264; doi:10.1136/bmjopen-2020-041317), 2021-02-03
Supplement: bmjopen-2020-041317supp001.pdf [file bmjopen-2020-041317supp001.pdf]

## Supplementary File 1

**Page 2:**

International Classification of Disease-10 codes used to estimate palliative care need

**Page 3:**

Role of participants in the expert consultation

**Page 4 - 8:**

Strength of agreement with survey items

**Page 9 – 10**

Strobe Statement (reporting guideline)

**International Classification of Disease-10 codes used to estimate palliative care need**

| <b>Disease Group</b> | <b>ICD10 Code</b>                                                                 | <b>Conditions included</b>                                                                                                                                                                      |
|----------------------|-----------------------------------------------------------------------------------|-------------------------------------------------------------------------------------------------------------------------------------------------------------------------------------------------|
| Cancer               | C00 – C97                                                                         | All deaths from malignant neoplasms.                                                                                                                                                            |
| Organ Failure        | I00 – I52 (excl. I12 & I13)<br>J40-47, J96<br>I12, I13, N17, N18, N28<br>K70 - 77 | Heart disease and heart failure.<br>Chronic lower respiratory disease, respiratory failure.<br>Reno-vascular disease, renal failure.<br>Liver disease.                                          |
| Dementia             | F01, F03, G30, R54                                                                | Dementia, vascular dementia, Alzheimer's disease, senility.                                                                                                                                     |
| Other                | G10, G12.2, G20, G23.1, G35, G90.3<br>I60 – I69<br>B20-24                         | Huntington's disease, motor neurone disease, Parkinson's disease, progressive supranuclear palsy, multiple sclerosis, multi-system atrophy. Haemorrhagic, ischaemic and unspecified stroke. HIV |

**Source:** Murtagh FEM, Verne J, Bausewein C, et al. How many people need palliative care? 2014.  
DOI: <https://doi.org/10.1177/0269216313489367>.

**Role of participants in the expert consultation**

| <b>Area/role</b>                                                                                          | <b>Number of participants</b> |
|-----------------------------------------------------------------------------------------------------------|-------------------------------|
| Service manager (3 x NHS; 2 x Hospices)                                                                   | 5                             |
| Policy (Government x 1, Specialist palliative care x 2; palliative care x 1; independent care sector x 1) | 4                             |
| Data analyst (Government)                                                                                 | 4                             |
| GP                                                                                                        | 4                             |
| Researcher (University x 2; charity x 2)                                                                  | 4                             |
| Palliative care specialist (doctor x 2; nurse x 2)                                                        | 4                             |
| Quality Improvement Facilitator (NHS)                                                                     | 2                             |
| Hospice manager                                                                                           | 2                             |
| PPI                                                                                                       | 1                             |
| Project manager (Advocacy organisation)                                                                   | 1                             |
| Volunteer (Hospice)                                                                                       | 1                             |
| Administrator                                                                                             | 1                             |
| Chief Executive (advocacy organisation)                                                                   | 1                             |
| <b>Grand Total</b>                                                                                        | <b>34</b>                     |

## Strength of agreement with survey items

| Area                    | Recommended actions                                                                                                                                                     | Agreement rating 1 (strongly disagree) to 9 (strongly agree) |     |        |     |     |     | Action indicated, equivocal or not indicated | Consensus / Strength of agreement |
|-------------------------|-------------------------------------------------------------------------------------------------------------------------------------------------------------------------|--------------------------------------------------------------|-----|--------|-----|-----|-----|----------------------------------------------|-----------------------------------|
|                         |                                                                                                                                                                         | Mean                                                         | SD  | Median | IQR | Min | Max |                                              |                                   |
| Digital technology      | Invest in the national digital platform so it is fully resourced and can be used by all                                                                                 | 8.5                                                          | 0.7 | 9      | 1   | 7   | 9   | Indicated                                    | Close agreement                   |
|                         | Ensure that integrated electronic care records are accessible to all health and social care professionals involved in the care of the person, and the person themselves | 8.5                                                          | 0.9 | 9      | 1   | 6   | 9   | Indicated                                    | Close agreement                   |
|                         | Adopt digital technology such as videoconferencing and telemedicine to facilitate access to support for people with palliative care needs and their carers at home      | 7.6                                                          | 1.5 | 8      | 3   | 4   | 9   | Indicated                                    | Broad agreement                   |
| Person centred approach | Prioritise the patient/carer perspective, value the views of the person receiving care and use this information to provide services tailored to their needs.            | 8.5                                                          | 1.0 | 9      | 1   | 5   | 9   | Indicated                                    | Close agreement                   |
|                         | Encourage systems that promote person centred rather than task-oriented care                                                                                            | 8.3                                                          | 1.1 | 9      | 1   | 5   | 9   | Indicated                                    | Close agreement                   |
|                         | Personalise settings that aren't home (hospices, care home, hospital)                                                                                                   | 7.8                                                          | 1.3 | 8      | 2   | 5   | 9   | Indicated                                    | Close agreement                   |

|                                               |                                                                                                                                                                                                                |     |     |     |   |   |   |           |                 |
|-----------------------------------------------|----------------------------------------------------------------------------------------------------------------------------------------------------------------------------------------------------------------|-----|-----|-----|---|---|---|-----------|-----------------|
| <b>Specialist/generalist palliative care</b>  | Increase capacity and enhance community specialist palliative care services to support primary care                                                                                                            | 7.8 | 1.1 | 8   | 2 | 6 | 9 | Indicated | Close agreement |
|                                               | Prioritise models that improve communication between specialist and non-specialist services to improve the patient journey                                                                                     | 7.7 | 1.4 | 8   | 2 | 5 | 9 | Indicated | Close agreement |
|                                               | Build specialist palliative care capacity to provide education and support to generalists.                                                                                                                     | 7.3 | 1.2 | 7.5 | 2 | 5 | 9 | Indicated | Close agreement |
| <b>Informal carer &amp; community support</b> | Create opportunities to facilitate and improve conversations around death and dying both in clinical practice and in society in general.                                                                       | 8.0 | 1.2 | 8.5 | 2 | 5 | 9 | Indicated | Close agreement |
|                                               | Support communities to start compassionate community initiatives with a focus on improving people's experiences of deteriorating health, death, dying and bereavement, by providing advice on ways to do this. | 7.9 | 1.2 | 8   | 2 | 5 | 9 | Indicated | Close agreement |
|                                               | Build community capacity for informal care; not just formal volunteers, but also "active, engaged citizens"                                                                                                    | 7.9 | 1.2 | 8   | 2 | 5 | 9 | Indicated | Close agreement |
| <b>Research, data &amp; evidence</b>          | Collect and collate care data to increase understanding of unmet needs in order to inform service design and workforce planning                                                                                | 7.9 | 1.0 | 8   | 2 | 5 | 9 | Indicated | Close agreement |
|                                               | Access and use evidence to improve our understanding of people's needs                                                                                                                                         | 7.8 | 1.1 | 8   | 2 | 5 | 9 | Indicated | Close agreement |

|                                     |                                                                                                                                                 |     |     |     |   |   |   |           |                 |
|-------------------------------------|-------------------------------------------------------------------------------------------------------------------------------------------------|-----|-----|-----|---|---|---|-----------|-----------------|
|                                     | and outcomes in palliative care and inform service planning.                                                                                    |     |     |     |   |   |   |           |                 |
| <b>Workforce</b>                    | Better integrate workforce planning and investment to meet projected increases in future palliative care need                                   | 8.0 | 1.4 | 8.5 | 2 | 4 | 9 | Indicated | Close agreement |
|                                     | Increase investment in the community-based workforce including GPs, community nurses, social care staff and nurse specialists                   | 7.9 | 1.5 | 8.5 | 2 | 4 | 9 | Indicated | Close agreement |
|                                     | Prioritise investment in recruitment, retention, education and training for social care staff                                                   | 7.7 | 1.5 | 8   | 2 | 4 | 9 | Indicated | Close agreement |
|                                     | Promote approaches that make both health and social care professionals feel part of the same team.                                              | 7.5 | 1.5 | 8   | 3 | 4 | 9 | Indicated | Broad agreement |
| <b>Governance and commissioning</b> | Encourage Scottish Government to invest in palliative care and to re-establish palliative care policy framework and recommendations             | 8.1 | 1.4 | 9   | 1 | 5 | 9 | Indicated | Close agreement |
|                                     | Conduct evidence based strategic planning to facilitate decision-making regarding models of care and resource use                               | 7.5 | 1.4 | 8   | 3 | 4 | 9 | Indicated | Broad agreement |
|                                     | Increase accountability for embedding existing evidence based good practice                                                                     | 6.9 | 1.5 | 7   | 2 | 4 | 9 | Indicated | Broad agreement |
| <b>Models or approaches to care</b> | Realign palliative care in the health service system. Move away from focus on disease specific and episodic care to management of complex needs | 7.5 | 1.3 | 8   | 2 | 5 | 9 | Indicated | Close agreement |

|                                     |                                                                                                                                                                 |     |     |     |   |   |   |           |                 |
|-------------------------------------|-----------------------------------------------------------------------------------------------------------------------------------------------------------------|-----|-----|-----|---|---|---|-----------|-----------------|
|                                     | Improve efficiency and flexibility of bed use in community settings (e.g. respite admissions to NHS complex care units or care homes) to benefit more people    | 7.5 | 1.4 | 8   | 2 | 4 | 9 | Indicated | Close agreement |
|                                     | Improve coordination and greater use of multi-disciplinary teams for people with dementia                                                                       | 7.4 | 1.5 | 7.5 | 2 | 4 | 9 | Indicated | Close agreement |
|                                     | Reform commissioning processes in social care to enable compassion-led, relationship-centred, time flexible care.                                               | 7.4 | 1.4 | 7   | 3 | 5 | 9 | Indicated | Broad agreement |
|                                     | Promote use of formal tools and approaches to improve early identification for a palliative care approach                                                       | 7.3 | 1.4 | 7   | 3 | 5 | 9 | Indicated | Broad agreement |
| <b>Staff training and wellbeing</b> | Train care home and social care staff in the principles of palliative care to increase their confidence in identifying and caring for people at the end of life | 8.1 | 0.9 | 8   | 2 | 6 | 9 | Indicated | Close agreement |
|                                     | Promote and encourage self-compassion, self-reliance and empathy amongst staff                                                                                  | 7.3 | 1.8 | 8   | 3 | 4 | 9 | Indicated | Broad agreement |
|                                     | Invest in palliative care training for generalists in all settings                                                                                              | 7.6 | 1.5 | 8   | 3 | 5 | 9 | Indicated | Broad agreement |
|                                     | Increase social care staff training to recognise and respond to clients' psychological needs                                                                    | 7.2 | 1.5 | 7   | 3 | 5 | 9 | Indicated | Broad agreement |
|                                     | Prioritise education and training in communication and listening skills                                                                                         | 7.2 | 1.7 | 7   | 3 | 3 | 9 | Indicated | Broad agreement |

|  |                                                                                                    |     |     |     |   |   |   |           |                 |
|--|----------------------------------------------------------------------------------------------------|-----|-----|-----|---|---|---|-----------|-----------------|
|  | Organisations providing care should invest in compassionate and supportive systems for their staff | 7.3 | 1.4 | 7   | 3 | 5 | 9 | Indicated | Broad agreement |
|  | Provide education and training for leaders including compassionate care.                           | 6.5 | 1.6 | 6.5 | 2 | 3 | 9 | Equivocal | Broad agreement |



## STROBE STATEMENT

|                              | Item No | Recommendation                                                                                                                                                                       | Page No                                                           |
|------------------------------|---------|--------------------------------------------------------------------------------------------------------------------------------------------------------------------------------------|-------------------------------------------------------------------|
| <b>Title and abstract</b>    | 1       | (a) Indicate the study's design with a commonly used term in the title or the abstract                                                                                               | P4                                                                |
|                              |         | (b) Provide in the abstract an informative and balanced summary of what was done and what was found                                                                                  | P4-5                                                              |
| <b>Introduction</b>          |         |                                                                                                                                                                                      |                                                                   |
| Background/rationale         | 2       | Explain the scientific background and rationale for the investigation being reported                                                                                                 | P7-8                                                              |
| Objectives                   | 3       | State specific objectives, including any prespecified hypotheses                                                                                                                     | P8                                                                |
| <b>Methods</b>               |         |                                                                                                                                                                                      |                                                                   |
| Study design                 | 4       | Present key elements of study design early in the paper                                                                                                                              | P8                                                                |
| Setting                      | 5       | Describe the setting, locations, and relevant dates, including periods of recruitment, exposure, follow-up, and data collection                                                      | P9 & P12                                                          |
| Participants                 | 6       | (a) Give the eligibility criteria, and the sources and methods of selection of participants. Describe methods of follow-up                                                           | P9                                                                |
|                              |         | (b) For matched studies, give matching criteria and number of exposed and unexposed                                                                                                  | NA                                                                |
| Variables                    | 7       | Clearly define all outcomes, exposures, predictors, potential confounders, and effect modifiers. Give diagnostic criteria, if applicable                                             | P10-12                                                            |
| Data sources/<br>measurement | 8*      | For each variable of interest, give sources of data and details of methods of assessment (measurement). Describe comparability of assessment methods if there is more than one group | P9 Datasources, and Supplementary file 2                          |
| Bias                         | 9       | Describe any efforts to address potential sources of bias                                                                                                                            | Use of a range of methods to estimate future palliative care need |
| Study size                   | 10      | Explain how the study size was arrived at                                                                                                                                            | National dataset – P9                                             |
| Quantitative variables       | 11      | Explain how quantitative variables were handled in the analyses. If applicable, describe which groupings were chosen and why                                                         | NA                                                                |
| Statistical methods          | 12      | (a) Describe all statistical methods, including those used to control for confounding                                                                                                | P10-11                                                            |

|                  |     |                                                                                                                                                                                                   |                                                                                                         |
|------------------|-----|---------------------------------------------------------------------------------------------------------------------------------------------------------------------------------------------------|---------------------------------------------------------------------------------------------------------|
|                  |     | (b) Describe any methods used to examine subgroups and interactions                                                                                                                               | NA                                                                                                      |
|                  |     | (c) Explain how missing data were addressed                                                                                                                                                       | NA                                                                                                      |
|                  |     | (d) If applicable, explain how loss to follow-up was addressed                                                                                                                                    | NA                                                                                                      |
|                  |     | (e) Describe any sensitivity analyses                                                                                                                                                             | Alternative models described                                                                            |
| <b>Results</b>   |     |                                                                                                                                                                                                   |                                                                                                         |
| Participants     | 13* | (a) Report numbers of individuals at each stage of study—eg numbers potentially eligible, examined for eligibility, confirmed eligible, included in the study, completing follow-up, and analysed | NA for quantitative analysis; P19 for and supplementary file 1 for participation in expert consultation |
|                  |     | (b) Give reasons for non-participation at each stage                                                                                                                                              | NA for quantitative analysis' not known for expert consultation/survey.                                 |
|                  |     | (c) Consider use of a flow diagram                                                                                                                                                                | NA                                                                                                      |
| Descriptive data | 14* | (a) Give characteristics of study participants (eg demographic, clinical, social) and information on exposures and potential confounders                                                          | For expert consultation see supplementary material 1                                                    |
|                  |     | (b) Indicate number of participants with missing data for each variable of interest                                                                                                               | NA                                                                                                      |
|                  |     | (c) Summarise follow-up time (eg, average and total amount)                                                                                                                                       | NA                                                                                                      |
| Outcome data     | 15* | Report numbers of outcome events or summary measures over time                                                                                                                                    | Estimates of palliative care need over time shown in results.                                           |
